# Supplementary material for: Infectious hematopoietic necrosis virus (IHNV) persistence in Sockeye Salmon: influence on brain transcriptome and subsequent response to the viral mimic poly(I:C)
Source: BMC Genomics. 2015 Aug 26;16(1):634. doi: 10.1186/s12864-015-1759-y (PMC4549833; doi:10.1186/s12864-015-1759-y)
Supplement: Additional file 2: Table S1. — Complete list of significantly differentially expressed probes that were affected by IHNV status (survivor, carrier), poly(I:C)-injection and an interaction effect of both factors. [file 12864_2015_1759_MOESM2_ESM.xlsx]

## Sheet: MFX-IHNV status-1510
Spot ID	p-value(IHNV status)	p-value(IHNV status-polyIC)	p-value(polyIC)	Fold change([control-survivor] vs [control-naive])	Log Fold change([control-survivor] vs [control-naive])	Fold change([control-z_carrier] vs [control-naive])	Log Fold change([control-z_carrier] vs [control-naive])	Fold change([polyIC-naive] vs [control-naive])	Log Fold change([polyIC-naive] vs [control-naive])	Fold change([control-z_carrier] vs [control-survivor])	Log Fold change([control-z_carrier] vs [control-survivor])	Fold change([polyIC-survivor] vs [control-survivor])	Log Fold change([polyIC-survivor] vs [control-survivor])	Fold change([polyIC-z_carrier] vs [control-z_carrier])	Log Fold change([polyIC-z_carrier] vs [control-z_carrier])	Fold change([polyIC-survivor] vs [polyIC-naive])	Log Fold change([polyIC-survivor] vs [polyIC-naive])	Fold change([polyIC-z_carrier] vs [polyIC-naive])	Log Fold change([polyIC-z_carrier] vs [polyIC-naive])	Fold change([polyIC-z_carrier] vs [polyIC-survivor])	Log Fold change([polyIC-z_carrier] vs [polyIC-survivor])	Description	GeneId	UniGene
C034R001	0.00871593	0.0105723	0.65745	1.07431	0.103414	1.0482	0.0679138	1.17767	0.235941	-1.02491	-0.0354999	1.24921	0.321016	-1.65532	-0.727109	1.13957	0.188489	-1.85978	-0.895136	-2.11935	-1.08362	UNKNOWN
C054R001	2.37786e-08	0.222772	0.155741	1.62617	0.701479	1.59461	0.673205	1.04229	0.0597577	-1.01979	-0.0282743	-1.07673	-0.106653	-1.22144	-0.288587	1.44901	0.535069	1.25254	0.32486	-1.15686	-0.210209	RNA 3'-terminal phosphate cyclase-like protein	59028	Mm.28630
C100R001	0.00018133	0.167983	0.800609	-1.18328	-0.242793	-1.29744	-0.375668	1.18238	0.24169	-1.09648	-0.132875	-1.1144	-0.156267	-1.00511	-0.00735512	-1.55914	-0.640749	-1.5419	-0.624713	1.01118	0.0160367	Microfibrillar-associated protein 2 precursor	17150	Mm.7386
C101R001	0.00015556	0.104961	4.65642e-07	2.4365	1.28481	1.18464	0.244449	-1.73585	-0.795646	-2.05674	-1.04036	-3.09485	-1.62987	-2.31227	-1.20931	1.3666	0.450586	-1.12445	-0.169214	-1.53666	-0.6198	Beta-1,3-glucosyltransferase	145173	Hs.13205
C115R001	3.09902e-09	0.312796	0.0307599	1.67588	0.744918	1.34002	0.422256	-1.32363	-0.404498	-1.25064	-0.322662	-1.13743	-0.185783	-1.03779	-0.0535081	1.95021	0.963632	1.70911	0.773245	-1.14107	-0.190387	UNKNOWN
C122R001	0.00297176	0.253984	0.0104423	-1.11073	-0.151506	-1.26157	-0.33522	-1.19318	-0.254815	-1.1358	-0.183714	-1.03017	-0.0428881	-1.27339	-0.348672	1.04277	0.0604211	-1.34637	-0.429077	-1.40396	-0.489498	Retinoic acid receptor RXR-beta-A	30530	Dr.351
C177R001	0.00133353	0.538613	0.00223602	1.56905	0.649889	1.14317	0.193041	-1.34364	-0.426151	-1.37254	-0.456848	-1.55319	-0.635238	-1.20618	-0.270451	1.35736	0.440802	1.27345	0.348741	-1.06589	-0.0920608	Superoxide dismutase [Cu-Zn]	30553	Dr.75822
C184R001	0.00394625	0.0815103	0.822101	-1.48793	-0.573303	-1.36305	-0.44684	-1.17255	-0.229651	1.09161	0.126463	1.1694	0.225766	1.04995	0.070324	-1.08514	-0.117886	-1.10716	-0.146865	-1.02029	-0.028979	Splicing factor, arginine/serine-rich 7	225027	Mm.292016
C203R001	0.000701548	0.0646772	0.000394578	1.04641	0.0654419	-1.1462	-0.196855	-1.20922	-0.274081	-1.19939	-0.262296	-1.11584	-0.158136	-1.77811	-0.830345	1.13397	0.181388	-1.68543	-0.753118	-1.91124	-0.934505	Nascent polypeptide-associated complex subunit alpha	513312	Bt.24178
C239R001	1.03946e-05	0.0549076	4.8057e-09	1.24339	0.314284	1.10749	0.147299	-1.32812	-0.409384	-1.12271	-0.166985	-1.2896	-0.366928	-1.71127	-0.775069	1.28053	0.356741	-1.16343	-0.218386	-1.48981	-0.575127	Cystatin-B
C055R002	2.45224e-05	0.194975	0.299098	-1.32815	-0.409419	-1.22069	-0.287699	1.16304	0.217904	1.08803	0.121719	1.1579	0.211507	-1.12085	-0.164599	-1.33405	-0.415816	-1.5913	-0.670202	-1.19283	-0.254386	Heterogeneous nuclear ribonucleoprotein Q	56403	Mm.260545
C101R002	0.00083241	0.665337	5.3092e-05	1.16117	0.215583	1.17979	0.23853	-1.23334	-0.302575	1.01603	0.0229471	-1.16486	-0.220151	-1.27926	-0.355311	1.22945	0.298007	1.13744	0.185794	-1.08089	-0.112213	60S ribosomal protein L27
C111R002	0.000480579	0.291058	0.00137487	1.375	0.459429	1.3382	0.42029	-1.45765	-0.543646	-1.0275	-0.0391386	-1.53936	-0.622327	-1.08555	-0.118424	1.30202	0.380748	1.7969	0.845512	1.38009	0.464764	Integral membrane protein 2B	395969	Gga.9467
C120R002	0.00246925	0.817229	0.520934	1.2659	0.340166	1.08282	0.114797	-1.10905	-0.14932	-1.16908	-0.225369	-1.0307	-0.0436231	-1.00322	-0.00463276	1.36213	0.445863	1.19705	0.259484	-1.1379	-0.186379	UNKNOWN
C185R002	0.00219141	0.441374	0.669716	-1.05388	-0.0757172	-1.35041	-0.433393	-1.06065	-0.0849525	-1.28136	-0.357676	1.03476	0.0492958	1.08957	0.123759	1.0414	0.0585311	-1.16852	-0.224682	-1.2169	-0.283213	Probable D-tyrosyl-tRNA(Tyr) deacylase 2	100002107; 445510	Dr.113280; Dr.88725
C205R002	0.000650479	0.993987	0.145743	-1.23492	-0.30442	-1.38779	-0.47279	1.08789	0.121534	-1.12379	-0.168369	1.1016	0.139594	1.10218	0.140353	-1.21956	-0.28636	-1.3698	-0.45397	-1.1232	-0.16761	Coronin-1C	23603	Hs.681389
C207R002	0.00162443	0.400961	0.138007	1.43119	0.517211	-1.06074	-0.0850733	-1.10352	-0.142113	-1.51812	-0.602285	-1.28564	-0.362484	1.00105	0.00150938	1.22845	0.29684	1.04142	0.0585489	-1.17959	-0.238291	Macrophage migration inhibitory factor	4282	Hs.407995
C245R002	0.00299464	0.249008	0.302246	-1.13575	-0.183644	-1.15592	-0.209043	-1.06079	-0.0851372	-1.01776	-0.0253984	-1.14665	-0.197429	1.05982	0.0838181	-1.22768	-0.295936	-1.02818	-0.0400875	1.19404	0.255849	Cytochrome b-c1 complex subunit 2, mitochondrial precursor	7385	Hs.592048
C031R003	0.00131269	0.357939	0.00381875	-1.3036	-0.382505	-1.43562	-0.521676	-1.30157	-0.380258	-1.10127	-0.13917	-1.10702	-0.146681	-1.47505	-0.560768	-1.10875	-0.148928	-1.62697	-0.702185	-1.4674	-0.553257	UNKNOWN
C041R003	0.000116138	0.639115	0.0170269	-1.35878	-0.442312	-1.52818	-0.611814	-1.17733	-0.23552	-1.12467	-0.169503	-1.13911	-0.187901	-1.39849	-0.483874	-1.31466	-0.394692	-1.81525	-0.860168	-1.38077	-0.465476	Structural maintenance of chromosomes protein 2		Mm.2999
C076R003	0.000853569	0.029107	0.0711367	1.60989	0.686962	1.27471	0.350174	-1.02256	-0.0321831	-1.26294	-0.336788	-1.4756	-0.561297	1.00936	0.0134346	1.11562	0.157848	1.31566	0.395792	1.17931	0.237944	Clusterin precursor
C081R003	0.00139435	0.749065	0.0489879	1.54052	0.623419	2.57405	1.36404	-1.47165	-0.557438	1.67089	0.740618	-1.78713	-0.837647	-1.23941	-0.309654	1.26858	0.34321	3.05638	1.61182	2.4093	1.26861	Ig kappa-b4 chain C region
C155R003	0.000408796	0.360358	0.0596893	-1.11399	-0.155738	-1.24197	-0.31263	-1.00614	-0.00882503	-1.11488	-0.156892	-1.1173	-0.160011	-1.23156	-0.300486	-1.23707	-0.306924	-1.52023	-0.604291	-1.2289	-0.297368	Histone H3.3	117056	Rn.124815; Rn.198918; Rn.29857
C164R003	0.00175155	0.0171686	6.35262e-08	1.3789	0.463515	1.05534	0.0777023	2.33962	1.22628	-1.3066	-0.385813	8.77885	3.13403	13.955	3.80271	5.17397	2.37127	6.29468	2.65413	1.2166	0.282861	Proteasome subunit beta type-8 precursor	24968	Rn.203098
C190R003	0.000179015	0.634858	0.141143	1.50896	0.593552	2.48124	1.31106	-1.41155	-0.497279	1.64434	0.717509	-1.52774	-0.611402	1.00087	0.00126106	1.39419	0.479429	3.50545	1.8096	2.51433	1.33017	Ig kappa chain V region 3368
C203R003	0.00231298	0.807216	0.0210191	1.27949	0.35557	1.2156	0.281663	-1.25445	-0.327053	-1.05256	-0.0739072	-1.21895	-0.285645	-1.10765	-0.147507	1.31675	0.396978	1.3767	0.461209	1.04553	0.0642309	Cardiolipin synthetase	54675	Hs.224764
C218R003	0.00589359	0.853431	0.636549	1.23049	0.299235	1.23506	0.304587	-1.04785	-0.0674309	1.00372	0.00535221	1.01789	0.0255755	-1.0744	-0.103525	1.31243	0.392241	1.20455	0.268492	-1.08956	-0.123749	Disabled homolog 2	1601	Hs.481980
C017R004	7.72985e-05	0.164458	0.142911	-1.89853	-0.924879	-1.62806	-0.703158	-1.10395	-0.142675	1.16612	0.221721	1.18664	0.246879	1.44432	0.530389	-1.44927	-0.535324	-1.02108	-0.0300937	1.41935	0.50523	UNKNOWN
C019R004	0.00195672	0.192432	0.191419	-1.43013	-0.516146	-1.33213	-0.41374	1.07429	0.103387	1.07356	0.102406	1.33928	0.421454	-1.05282	-0.0742593	-1.14717	-0.198079	-1.50669	-0.591386	-1.3134	-0.393307	UNKNOWN
C032R004	0.00789397	0.215511	0.0918176	1.42219	0.508118	1.40268	0.488182	1.028	0.0398338	-1.01391	-0.0199358	-1.10079	-0.138536	-1.45825	-0.544237	1.25679	0.329748	-1.06872	-0.0958881	-1.34316	-0.425637	UNKNOWN
C048R004	0.00227551	0.0133813	0.000430182	-1.06946	-0.0968823	-1.09027	-0.12468	-1.10438	-0.143242	-1.01945	-0.0277979	-1.10539	-0.144549	-1.92404	-0.944136	-1.07043	-0.0981896	-1.89944	-0.925574	-1.77447	-0.827385	Methylmalonyl-CoA epimerase, mitochondrial precursor	84693	Hs.94949
C052R004	0.000946379	0.358985	0.121036	2.44115	1.28756	5.85074	2.54862	-4.01323	-2.00476	2.39672	1.26106	-1.08049	-0.111682	-1.9737	-0.9809	9.06711	3.18064	11.8967	3.57248	1.31207	0.391841	Cytosolic non-specific dipeptidase	55748	Hs.149185
C092R004	3.98693e-05	0.066796	0.00412075	1.31606	0.396225	1.28858	0.365779	-1.09997	-0.137463	-1.02133	-0.0304466	-1.3186	-0.399007	-1.04216	-0.0595732	1.09785	0.134681	1.36006	0.443668	1.23884	0.308987	40S ribosomal protein S23
C141R004	0.000308108	0.145069	0.0578359	-1.8221	-0.865599	-1.52878	-0.612382	-1.05667	-0.0795246	1.19186	0.253217	1.19525	0.257312	1.64282	0.716173	-1.44269	-0.528762	1.13549	0.183316	1.63816	0.712078	Collagen alpha-1(XVIII) chain precursor	12822	Mm.4352
C144R004	0.00572977	0.324163	0.145902	1.7572	0.813277	1.6117	0.688584	1.01365	0.019556	-1.09028	-0.124693	-1.41162	-0.497348	-1.21106	-0.27627	1.22805	0.296372	1.3129	0.392758	1.06909	0.0963857	5'-nucleotidase domain-containing protein 2	290558	Rn.2956
C163R004	0.00318103	0.1884	0.464074	1.09957	0.136941	1.25057	0.32259	1.01274	0.0182683	1.13733	0.185649	1.17123	0.22802	-1.06177	-0.0864645	1.27164	0.346692	1.163	0.217857	-1.09341	-0.128835	Proteasome activator complex subunit 3	420017	Gga.5999
C165R004	0.00299684	0.34429	0.0525762	2.81022	1.49068	3.25674	1.70343	-1.72878	-0.789756	1.15889	0.212748	-1.08882	-0.12276	-4.01882	-2.00677	4.46196	2.15768	1.40096	0.486413	-3.18494	-1.67127	Soluble guanylate cyclase 88E	41825	Dm.16858
C206R004	0.00221347	0.0776041	6.10224e-05	-1.10445	-0.143324	-1.23797	-0.30798	-1.3084	-0.3878	-1.1209	-0.164656	-1.28982	-0.367168	-2.24552	-1.16705	-1.08876	-0.122693	-2.12466	-1.08723	-1.95144	-0.964539	Membrane metallo-endopeptidase-like 1	79258	Hs.591453
C215R004	0.000867432	0.878857	0.271966	1.23658	0.306359	1.03059	0.0434767	-1.0226	-0.0322436	-1.19987	-0.262882	-1.06375	-0.0891562	-1.08187	-0.113531	1.18875	0.249446	-1.02656	-0.037811	-1.22032	-0.287257	Zinc finger protein ZPR1	504523	Bt.2531
C231R004	0.00614854	0.195883	0.00793416	1.71525	0.77842	1.48418	0.569661	-1.12265	-0.166907	-1.15569	-0.208759	-1.65412	-0.726066	-1.31182	-0.391574	1.16414	0.219261	1.27015	0.344994	1.09106	0.125733	Ictacalcin
C240R004	0.000593817	0.717363	0.167365	1.66898	0.73897	1.49123	0.576504	-1.11333	-0.154884	-1.1192	-0.162466	-1.29495	-0.372898	-1.08362	-0.115864	1.43491	0.520956	1.53211	0.615523	1.06775	0.0945678	Claudin-6	9074	Hs.533779
C247R004	0.000338052	0.511427	0.23474	-1.16361	-0.218609	-1.26719	-0.341635	-1.06001	-0.0840784	-1.08902	-0.123026	1.01282	0.0183841	-1.12368	-0.168235	-1.08384	-0.116146	-1.34331	-0.425791	-1.2394	-0.309645	Histone H3
C017R005	0.00946995	0.880147	0.0959383	1.20246	0.265992	1.07647	0.106306	-1.16305	-0.217911	-1.11704	-0.159686	-1.09269	-0.127886	-1.09879	-0.135912	1.27989	0.356017	1.13942	0.188305	-1.12328	-0.167712	AP-2 complex subunit mu-1-B	321051	Dr.76279
C026R005	0.00303836	0.679857	0.652384	1.38672	0.471672	1.09057	0.12508	1.02082	0.0297312	-1.27155	-0.346593	-1.0482	-0.0679106	1.14099	0.190281	1.29597	0.374031	1.21894	0.28563	-1.06319	-0.088401	Heat shock 70 kDa protein 1
C046R005	0.00324314	0.586234	0.0143547	1.42327	0.509211	1.34548	0.428121	-1.32231	-0.403058	-1.05782	-0.0810901	-1.44461	-0.530683	-1.10919	-0.149506	1.30277	0.381587	1.604	0.681673	1.23122	0.300087	Annexin A5	428767	Gga.1168
C061R005	0.00911832	0.283394	0.000423827	1.29038	0.367799	1.04511	0.0636615	-1.1625	-0.217229	-1.23468	-0.304137	-1.37038	-0.454573	-1.18216	-0.241423	1.09464	0.130455	1.02773	0.0394671	-1.0651	-0.0909879	Crystallin J1A
C065R005	0.00924734	0.0764193	0.00167679	-1.59324	-0.671964	-1.15242	-0.204664	1.15457	0.20736	1.38252	0.4673	1.68596	0.753572	1.21522	0.281218	-1.09108	-0.125752	-1.09491	-0.130806	-1.00351	-0.00505393	Citrate synthase, mitochondrial precursor
C090R005	0.00178082	0.272337	0.0762748	1.06291	0.0880187	1.16091	0.215252	1.05883	0.0824759	1.0922	0.127233	-1.00528	-0.00759521	1.18025	0.239087	-1.00142	-0.00205246	1.29402	0.371863	1.29586	0.373915	Transposable element Tc1 transposase
C104R005	0.00635162	0.541763	5.87772e-05	1.25438	0.326975	1.07592	0.105576	-1.4046	-0.490162	-1.16586	-0.221399	-1.43492	-0.520965	-1.19878	-0.261572	1.22788	0.296172	1.26065	0.334167	1.02669	0.0379942	60S ribosomal protein L3	6122	Hs.119598
C105R005	0.00571037	0.0389026	0.0740786	1.33464	0.416456	1.33372	0.415461	1.08292	0.114929	-1.00069	-0.000994652	-1.17067	-0.227333	-1.22255	-0.289889	1.05277	0.0741942	1.0074	0.0106431	-1.04503	-0.0635512	Tubulin beta-4 chain
C126R005	0.0048181	0.317002	5.26961e-05	1.38356	0.468383	1.23397	0.303306	-1.29597	-0.374029	-1.12123	-0.165077	-1.56874	-0.649602	-1.28309	-0.359618	1.14299	0.192809	1.24636	0.317717	1.09044	0.124908	CD209 antigen-like protein E	170780	Mm.52281
C133R005	0.00054186	0.0393433	0.0114185	-1.15429	-0.207002	-1.13067	-0.177173	1.01043	0.0149751	1.02089	0.029829	-1.08934	-0.123448	-1.54421	-0.626867	-1.27052	-0.345425	-1.7642	-0.819014	-1.38856	-0.47359	UNKNOWN
C143R005	7.47824e-05	0.939876	0.48155	1.22558	0.29347	1.14318	0.193053	-1.03182	-0.0451923	-1.07208	-0.100417	-1.0445	-0.0628073	-1.00772	-0.0110933	1.21071	0.275855	1.17052	0.227152	-1.03433	-0.0487029	UNKNOWN
C154R005	0.000757177	0.250468	0.274861	1.32728	0.408472	1.40742	0.493048	1.02723	0.038761	1.06038	0.0845763	-1.18808	-0.248627	-1.05069	-0.0713384	1.08755	0.121084	1.304	0.382949	1.19903	0.261865	UNKNOWN
C156R005	0.00314747	0.970603	0.192434	1.00526	0.00756726	1.37499	0.459425	-1.11142	-0.152404	1.3678	0.451858	-1.12459	-0.169395	-1.07272	-0.101279	-1.00655	-0.00942439	1.42459	0.51055	1.43393	0.519974	Nuclear receptor subfamily 2 group F member 1	30418	Dr.16
C176R005	0.00381376	0.472934	0.003102	-1.13338	-0.180636	1.0344	0.0487919	1.25283	0.325186	1.17237	0.229428	1.14944	0.200936	1.09114	0.125832	-1.23532	-0.304886	-1.11	-0.150562	1.1129	0.154324	Protein farnesyltransferase subunit beta	327686	Bt.4529
C177R005	0.00139063	0.930733	1.00089e-06	1.1657	0.221203	-1.14413	-0.194247	-1.48641	-0.571835	-1.33371	-0.415449	-1.4196	-0.505488	-1.46514	-0.551036	1.22057	0.28755	-1.12775	-0.173448	-1.37649	-0.460997	ATP synthase lipid-binding protein, mitochondrial precursor	228033	Mm.2966
C182R005	0.00543164	0.443351	0.18023	-1.25501	-0.3277	-1.30225	-0.381001	1.01105	0.0158542	-1.03764	-0.0533011	1.17115	0.227925	1.06732	0.0939859	-1.08345	-0.115629	-1.2336	-0.302869	-1.13858	-0.187241	Histone-binding protein RBBP4	321726	Dr.76462
C233R005	0.00401366	0.146979	0.0534936	-1.04128	-0.0583643	-1.10686	-0.146467	-1.02762	-0.0393122	-1.06297	-0.0881025	-1.00446	-0.00641523	-1.24701	-0.318468	-1.01781	-0.0254673	-1.34315	-0.425622	-1.31965	-0.400155	Histone H3.3	117056	Rn.124815; Rn.198918; Rn.29857
C014R006	0.000380122	0.763158	0.082438	1.22824	0.296589	2.64104	1.4011	-1.55994	-0.641495	2.15027	1.10452	-1.60067	-0.678673	-1.12153	-0.165464	1.19699	0.259411	3.67345	1.87714	3.06891	1.61772	Ig kappa-b4 chain C region
C025R006	5.84572e-10	0.301463	0.85151	-1.91275	-0.935646	-2.029	-1.02077	1.15382	0.206413	-1.06078	-0.0851192	-1.13323	-0.180445	-1.06936	-0.0967509	-2.501	-1.3225	-2.50347	-1.32393	-1.00099	-0.00142556	UNKNOWN
C101R006	0.00280566	0.746642	0.00609186	1.21876	0.285412	1.02044	0.0291844	-1.16673	-0.222466	-1.19435	-0.256228	-1.20425	-0.268136	-1.09208	-0.127081	1.18078	0.239742	1.09018	0.124569	-1.0831	-0.115173	Hydroxyacylglutathione hydrolase	509274	Bt.20141
C115R006	0.00402409	0.557354	0.0467072	-1.23771	-0.307669	-1.3334	-0.415114	-1.07006	-0.0976914	-1.07732	-0.107445	-1.28894	-0.366185	-1.35738	-0.440821	-1.49088	-0.576162	-1.69143	-0.758243	-1.13452	-0.182082	Farnesyl pyrophosphate synthetase		Gga.42725
C155R006	4.32803e-06	0.253653	0.12019	1.43772	0.523784	2.1111	1.078	-1.02111	-0.0301315	1.46837	0.554214	1.09169	0.126557	1.71595	0.779011	1.60266	0.680472	3.69901	1.88714	2.30804	1.20667	H-2 class II histocompatibility antigen gamma chain		Rn.33804
C165R006	0.00930836	0.137362	0.459065	-1.18329	-0.242808	-1.08478	-0.117399	-1.02146	-0.0306274	1.09082	0.125409	1.11023	0.150856	-1.01118	-0.0160372	-1.04342	-0.0613245	-1.07386	-0.102809	-1.02917	-0.0414846	E3 ubiquitin-protein ligase UBR5	51366	Hs.591856
C200R006	0.00213808	0.0574422	0.0464173	1.07779	0.108081	1.07692	0.106906	-1.31736	-0.397653	-1.00081	-0.00117471	1.00611	0.00878429	-1.08589	-0.118883	1.42852	0.514518	1.30647	0.385676	-1.09342	-0.128842	Protein BCCIP homolog	444344	Xl.78605
C214R006	0.00035069	0.823478	0.909971	1.21339	0.279048	1.10448	0.143369	-1.04356	-0.0615158	-1.09861	-0.135679	1.01297	0.0185937	1.01346	0.0192905	1.28268	0.359158	1.16811	0.224175	-1.09808	-0.134982	Coiled-coil domain-containing protein 82	66396	Mm.290620
C228R006	7.05562e-05	0.49272	0.520609	1.29938	0.377818	1.12458	0.169393	1.02324	0.033141	-1.15543	-0.208426	-1.03828	-0.054198	1.10725	0.146984	1.22305	0.290479	1.21692	0.283236	-1.00503	-0.00724384	UNKNOWN
C091R007	0.00106772	0.970901	0.331526	-1.13679	-0.184967	-1.2638	-0.337769	-1.03532	-0.0500704	-1.11173	-0.152803	-1.05942	-0.0832796	-1.04823	-0.0679502	-1.16326	-0.218176	-1.27956	-0.355649	-1.09998	-0.137473	UNKNOWN
C107R007	0.00956566	0.0194657	1.36019e-09	1.03548	0.0503024	1.11301	0.15446	2.89296	1.53255	1.07487	0.104158	9.34564	3.22429	10.4877	3.39063	3.3451	1.74205	4.03493	2.01254	1.20622	0.270493	UNKNOWN
C145R007	0.00217708	0.167885	0.0689447	1.00039	0.000558585	1.19399	0.25579	-1.02284	-0.0325853	1.19353	0.255231	1.18221	0.241484	1.15272	0.205047	1.20968	0.274628	1.40778	0.493422	1.16376	0.218794	UNKNOWN
C149R007	0.00010187	0.990185	0.669315	2.02675	1.01917	1.7498	0.807193	-1.04189	-0.0592048	-1.15828	-0.211978	-1.08356	-0.115776	-1.06029	-0.0844525	1.94882	0.9626	1.71945	0.781945	-1.1334	-0.180655	Basic leucine zipper and W2 domain-containing protein 2	393892	Dr.75376
C167R007	0.0078574	0.836094	0.153047	-1.17986	-0.23861	1.02186	0.0311952	1.0488	0.0687368	1.20565	0.269805	1.0694	0.0967952	1.14826	0.199445	-1.15713	-0.210552	1.11876	0.161904	1.29455	0.372456	UNKNOWN
C186R007	0.000228279	0.403181	0.123791	-1.15495	-0.207825	-1.23558	-0.305192	1.00741	0.010657	-1.06982	-0.0973668	-1.08594	-0.118941	-1.19647	-0.258785	-1.2635	-0.337423	-1.4893	-0.574634	-1.17871	-0.23721	Histone H3.3	117056	Rn.124815; Rn.198918; Rn.29857
C195R007	9.09905e-06	0.220706	0.000109869	-1.58653	-0.665872	-1.44669	-0.532753	1.14955	0.201074	1.09666	0.13312	1.41158	0.497314	1.39942	0.484833	-1.29202	-0.369632	-1.18838	-0.248994	1.08722	0.120639	ELAV-like protein 3	1995	Hs.1701
C198R007	0.00177717	0.229954	0.769319	1.16496	0.22028	1.16203	0.216648	-1.0506	-0.0712174	-1.00252	-0.00363279	1.12332	0.167769	-1.1265	-0.171849	1.37484	0.459267	1.08374	0.116016	-1.26861	-0.343252	tRNA-dihydrouridine synthase 4-like	11062	Hs.97627
C221R007	4.38982e-06	0.475999	0.324647	2.3026	1.20326	2.17593	1.12164	1.05837	0.0818487	-1.05821	-0.0816277	-1.24936	-0.321188	-1.20724	-0.271714	1.74137	0.800226	1.70299	0.768073	-1.02254	-0.0321531	Lysozyme g
C054R008	0.000970487	0.715772	0.0398649	-1.05213	-0.07331	1.36466	0.448544	1.22214	0.289411	1.4358	0.521854	1.08905	0.123074	1.22184	0.289054	-1.1807	-0.239647	1.36432	0.448187	1.61086	0.687834	Coiled-coil domain-containing protein 37
C088R008	0.00899483	0.512574	0.00568123	1.28692	0.363926	1.12443	0.169192	-1.24068	-0.311128	-1.14451	-0.194734	-1.33852	-0.420636	-1.09178	-0.126687	1.19285	0.254418	1.27777	0.353633	1.07119	0.0992148	Mitotic spindle assembly checkpoint protein MAD2B	10459	Hs.19400
C110R008	0.00888555	0.24749	0.0126519	1.39243	0.47761	1.2267	0.294779	-1.05176	-0.0727989	-1.13511	-0.18283	-1.31521	-0.395295	-1.21841	-0.285001	1.11351	0.155113	1.05891	0.0825772	-1.05156	-0.0725362	UNKNOWN
C132R008	0.00757159	0.611892	0.355155	-1.19646	-0.258768	1.24629	0.317646	-1.26239	-0.336154	1.49114	0.576413	-1.14279	-0.192561	1.05813	0.0815108	-1.08311	-0.115175	1.66476	0.73531	1.80311	0.850485	UNKNOWN
C172R008	0.000261197	0.5909	0.743727	-1.36446	-0.448332	-1.47021	-0.556019	1.014	0.0200532	-1.0775	-0.107687	-1.07702	-0.107047	1.14858	0.199848	-1.49012	-0.575433	-1.29794	-0.376224	1.14807	0.199208	Elongation of very long chain fatty acids protein 1	64834	Hs.25597
C219R008	0.00287243	0.543109	1.04507e-05	1.32703	0.408206	1.02696	0.0383746	-1.33488	-0.416715	-1.2922	-0.369831	-1.50479	-0.589564	-1.31012	-0.389699	1.1772	0.235357	1.04637	0.0653909	-1.12503	-0.169966	60S ribosomal protein L10	286790; 782629	Bt.46990
C123R009	0.00225384	0.827485	0.185028	1.25349	0.325948	2.12381	1.08666	-1.20746	-0.271976	1.69432	0.760708	-1.39878	-0.484171	-1.11606	-0.158409	1.08204	0.113753	2.29775	1.20022	2.12354	1.08647	Ig kappa chain V-IV region JI precursor
C124R009	0.000347361	0.232724	0.826423	-1.13012	-0.176478	-1.27746	-0.353274	1.03177	0.0451181	-1.13037	-0.176796	-1.09718	-0.133799	1.0959	0.132118	-1.27934	-0.355395	-1.2027	-0.266274	1.06372	0.0891209	26S proteasome non-ATPase regulatory subunit 6	9861	Hs.152536
C148R009	0.00526248	0.428469	0.750319	-1.08224	-0.114015	-1.06882	-0.0960231	1.074	0.102996	1.01255	0.0179919	-1.01838	-0.026277	-1.01821	-0.0260403	-1.18369	-0.243288	-1.16883	-0.225059	1.01272	0.0182287	CCR4-NOT transcription complex subunit 3	4849	Hs.343571
C152R009	0.00367556	0.690822	0.530141	-1.31996	-0.400496	-1.39649	-0.481801	1.15555	0.208579	-1.05797	-0.0813048	-1.03798	-0.0537746	1.10003	0.137538	-1.58321	-0.66285	-1.46697	-0.552842	1.07923	0.110008	Cytochrome P450 4B1	24307	Rn.86651
C234R009	0.00344114	0.037533	0.000963473	-1.10546	-0.144646	-1.00384	-0.00552389	-1.03389	-0.0480843	1.10123	0.139122	-1.07767	-0.107911	-1.3303	-0.411752	-1.15227	-0.204473	-1.29163	-0.369192	-1.12095	-0.164719	L-lactate dehydrogenase B chain
C252R009	0.000364689	0.184008	0.184067	1.25118	0.323289	1.09573	0.131893	-1.29161	-0.369173	-1.14187	-0.191396	-1.10235	-0.140582	1.0772	0.107293	1.46599	0.551879	1.52452	0.608358	1.03992	0.0564788	Protein BCCIP homolog	541348	Dr.105218
C012R010	2.6374e-05	0.0596513	0.0040673	1.23758	0.307521	1.50076	0.585695	1.02646	0.0376734	1.21266	0.278174	1.26393	0.337915	2.02794	1.02001	1.52389	0.607762	2.96501	1.56804	1.94568	0.960273	Oocyte zinc finger protein XlCOF20
C045R010	0.00735858	0.252135	0.159183	-1.12869	-0.174652	-1.27453	-0.349966	-1.07783	-0.108124	-1.12921	-0.175313	-1.24498	-0.316117	1.03291	0.0467183	-1.30373	-0.382645	-1.14482	-0.195123	1.13881	0.187522	Glutathione S-transferase kappa 1	373156	Hs.390667
C057R010	0.00169464	0.0755114	0.2548	1.09175	0.12664	1.11246	0.153758	1.04837	0.0681422	1.01897	0.0271183	-1.04487	-0.0633277	1.08002	0.111063	-1.00335	-0.00483009	1.14606	0.196679	1.1499	0.201509	U4/U6 small nuclear ribonucleoprotein Prp31	393476	Dr.76439
C065R010	5.70941e-05	0.563731	0.000942854	3.45445	1.78846	2.0809	1.05721	2.18963	1.13069	-1.66007	-0.731247	1.63142	0.706132	2.90778	1.53992	2.5738	1.3639	2.76338	1.46644	1.07366	0.102537	Galectin-3-binding protein precursor	3959	Hs.514535
C078R010	8.69646e-07	0.532394	0.488249	1.60666	0.684061	4.41293	2.14174	-1.41032	-0.496024	2.74666	1.45768	-1.33468	-0.416499	1.24751	0.319049	1.69771	0.763586	7.76405	2.95681	4.57326	2.19322	Ig mu chain C region membrane-bound form
C093R010	0.00107387	0.95605	0.149264	-1.31054	-0.390156	-1.22309	-0.290534	1.11316	0.154663	1.07149	0.0996224	1.07817	0.108587	1.13146	0.17818	-1.35307	-0.436232	-1.20332	-0.267017	1.12445	0.169216	UNKNOWN
C105R010	0.0032655	0.0465129	8.42913e-06	1.67935	0.747905	2.15469	1.10748	-1.23431	-0.30371	1.28305	0.359577	-1.92369	-0.943873	-2.27813	-1.18785	1.07754	0.107742	1.16744	0.223345	1.08343	0.115602	Endothelial lipase precursor	9388	Hs.465102
C115R010	9.68327e-05	0.586741	0.425108	-1.22926	-0.297787	-1.37534	-0.459784	-1.09648	-0.132876	-1.11884	-0.161997	-1.00101	-0.00145803	-1.01638	-0.0234373	-1.12223	-0.166368	-1.27487	-0.350345	-1.13601	-0.183977	UNKNOWN
C136R010	0.000714074	0.361361	0.0652216	-1.30442	-0.38341	-1.17261	-0.22972	1.231	0.299833	1.11241	0.15369	1.00362	0.00521249	1.32049	0.401068	-1.59996	-0.678031	-1.09315	-0.128485	1.46363	0.549546	Contactin-associated protein-like 2 precursor
C167R010	0.00147814	0.8586	2.19115e-06	1.99879	0.999124	1.42121	0.507116	-2.28813	-1.19417	-1.4064	-0.492008	-2.68197	-1.42329	-2.32151	-1.21506	1.70527	0.77	1.40077	0.486224	-1.21738	-0.283776	Beta-1,3-glucosyltransferase	145173	Hs.13205
C194R010	0.00683775	0.249758	0.00533235	1.0845	0.11703	-1.3833	-0.468112	1.0954	0.131453	-1.50019	-0.585142	1.50486	0.58963	1.47663	0.562313	1.48989	0.575207	-1.02616	-0.0372522	-1.52886	-0.61246	RING finger protein C1orf166 homolog	553180	Dr.87077
C221R010	0.00967896	0.828431	0.0125736	1.31657	0.396788	-1.03814	-0.0539962	-1.1849	-0.24477	-1.36678	-0.450784	-1.27795	-0.353832	-1.36074	-0.444396	1.22071	0.287726	-1.1922	-0.253621	-1.45533	-0.541347	UNKNOWN
C053R011	0.00548221	0.510299	0.229132	1.06721	0.0938453	-1.27365	-0.348964	1.23354	0.302805	-1.35925	-0.44281	1.24276	0.313549	-1.06894	-0.0961858	1.07519	0.10459	-1.67941	-0.747955	-1.80568	-0.852545	Cytochrome b	808306
C057R011	0.00613832	0.62719	0.11085	-1.14083	-0.190088	-1.00191	-0.0027601	1.15956	0.213582	1.13865	0.187328	1.0491	0.0691586	1.06739	0.094091	-1.26095	-0.334512	-1.08843	-0.122251	1.1585	0.212261	Cyclin-I	10983	Hs.699208
C072R011	0.00150569	0.154884	0.00369423	-1.21831	-0.284881	-1.02864	-0.0407438	1.11489	0.156903	1.18438	0.244137	1.10807	0.148048	1.55488	0.636806	-1.22581	-0.293736	1.35581	0.43916	1.66197	0.732895	103038 PRK07764, PRK07764, DNA polymerase III subunits gamma and tau; Validated.
C100R011	0.00804493	0.181565	7.41232e-06	1.27483	0.350306	1.06668	0.0931243	-1.22334	-0.290825	-1.19514	-0.257182	-1.4444	-0.530469	-1.22102	-0.288092	1.07972	0.110662	1.0687	0.0958576	-1.01031	-0.0148046	Vacuolar ATP synthase subunit e 1	338075	Bt.2450
C119R011	0.00500647	0.375037	0.00394245	1.14232	0.191972	1.292	0.369606	1.19823	0.260911	1.13103	0.177635	1.15797	0.211604	1.56496	0.64613	1.10394	0.142665	1.68743	0.754826	1.52855	0.612161	UNKNOWN
C137R011	0.00433415	0.537904	3.65396e-05	1.20792	0.272528	1.16346	0.218427	-1.25392	-0.326449	-1.03821	-0.0541009	-1.35114	-0.434176	-1.18412	-0.24381	1.12101	0.164801	1.23205	0.301066	1.09906	0.136265	60S ribosomal protein L26
C151R011	0.000257899	0.214514	0.044523	1.15773	0.211299	1.28143	0.357751	-1.01017	-0.0145986	1.10684	0.146452	1.24177	0.312401	1.25056	0.322576	1.45226	0.538299	1.6188	0.694926	1.11468	0.156627	UNKNOWN
C182R011	0.00764486	0.295533	0.327766	1.18436	0.244109	1.35161	0.434683	1.00659	0.00947556	1.14122	0.190574	1.02811	0.0400011	-1.23129	-0.300166	1.20969	0.274634	1.09054	0.125041	-1.10926	-0.149593	MAK16-like protein RBM13	192312	Dr.76904
C229R011	0.000561279	0.39026	0.00442559	1.49653	0.581623	1.16831	0.224422	-1.14012	-0.189181	-1.28094	-0.357201	-1.38066	-0.465354	-1.20613	-0.270381	1.2358	0.305449	1.10437	0.143222	-1.11901	-0.162227	Keratin, type II cytoskeletal 8	352911; 797433	Dr.104509; Dr.107385
C241R011	0.00517078	0.624008	0.00342645	-1.11042	-0.1511	-1.26594	-0.340213	-1.18849	-0.249124	-1.14006	-0.189113	-1.14552	-0.196007	-1.34941	-0.432329	-1.07028	-0.0979819	-1.43736	-0.523418	-1.34298	-0.425436	Mitochondrial carrier homolog 2
C249R011	0.000344096	0.109609	0.00144713	-1.85798	-0.893739	-1.65415	-0.726089	1.07221	0.100586	1.12323	0.16765	1.47174	0.557523	1.8114	0.857108	-1.3536	-0.436802	1.02132	0.0304326	1.38246	0.467235	Myelin-associated glycoprotein precursor	4099	Hs.643440
C006R012	0.000440907	0.156122	0.186374	1.39566	0.480949	1.43547	0.52152	-1.0107	-0.0153536	1.02852	0.0405711	-1.28866	-0.365866	-1.0043	-0.00618657	1.09462	0.130436	1.44462	0.530687	1.31974	0.400251	UNKNOWN
C048R012	0.000526071	0.0186406	0.461316	1.156	0.209137	1.28175	0.358114	1.13512	0.18284	1.10878	0.148977	-1.08938	-0.123512	1.03785	0.0535943	-1.06971	-0.0972141	1.17192	0.228869	1.25361	0.326083	Annexin A11	311	Hs.530291
C073R012	0.00470579	0.0297266	0.332401	-1.01475	-0.0211307	-1.13315	-0.18034	1.06189	0.0866288	-1.11668	-0.15921	-1.19341	-0.255092	-1.00858	-0.0123193	-1.28597	-0.362852	-1.2136	-0.279288	1.05963	0.0835632	Negative elongation factor A	24116	Mm.332320
C127R012	0.00198956	0.24963	0.022016	-1.31468	-0.39471	1.11339	0.15496	1.01894	0.0270703	1.46375	0.54967	1.26817	0.342754	1.45255	0.538593	-1.0563	-0.0790264	1.5872	0.666483	1.67657	0.745509	UNKNOWN
C165R012	0.00186425	0.357959	0.0534337	-1.20114	-0.264405	-1.00781	-0.0112218	1.30215	0.380896	1.19183	0.253184	1.04229	0.0597531	1.165	0.220331	-1.50061	-0.585548	-1.12645	-0.171787	1.33215	0.413761	Zinc finger protein 135	508062	Bt.25281
C172R012	0.00111205	0.0250032	0.307299	-1.28935	-0.36664	1.02502	0.0356584	-1.18917	-0.249958	1.32161	0.402299	1.12036	0.163963	1.29546	0.373463	1.03332	0.0472802	1.57908	0.65908	1.52816	0.6118	Protein NDRG3	448498	Str.7333
C178R012	0.00429982	0.209132	0.00361756	1.36467	0.448555	1.42967	0.51568	-1.06309	-0.0882646	1.04763	0.067125	-1.22671	-0.294795	-1.46026	-0.546222	1.18265	0.242024	1.04082	0.0577226	-1.13627	-0.184301	Extracellular matrix protein 1 precursor	116662	Rn.97792
C196R012	0.00613255	0.30229	0.260096	-1.18382	-0.243445	-1.22926	-0.297786	1.00428	0.00615788	-1.03838	-0.054341	1.15112	0.203041	1.01254	0.0179768	-1.0328	-0.0465617	-1.21923	-0.285967	-1.18051	-0.239405	UNKNOWN
C225R012	0.00104313	0.896044	0.138052	-1.17029	-0.226864	-1.21176	-0.277098	1.1014	0.139332	-1.03543	-0.0502348	1.05244	0.0737354	1.07542	0.104901	-1.22473	-0.292461	-1.24102	-0.31153	-1.01331	-0.0190689	Tubulin alpha-1 chain		Gga.35012
C043R013	0.00164766	0.244987	2.30613e-06	1.19164	0.252949	1.1475	0.198498	-1.37707	-0.461599	-1.03846	-0.0544513	-1.44562	-0.531686	-1.16471	-0.219972	1.13513	0.182863	1.35672	0.440125	1.19521	0.257263	rRNA 2'-O-methyltransferase fibrillarin		Xl.8139
C045R013	0.00497634	0.0760223	0.00236626	1.38006	0.464729	1.07101	0.0989746	-1.06965	-0.0971445	-1.28856	-0.365755	-1.39111	-0.47624	-1.17009	-0.226614	1.06115	0.085634	-1.02136	-0.0304943	-1.08382	-0.116128	Protein CutA homolog precursor	447112	Xl.35115
C062R013	0.00511756	0.574727	0.653338	-1.07657	-0.106448	1.06349	0.0888024	-1.01846	-0.0263942	1.14492	0.195251	-1.01453	-0.0208092	1.09088	0.125486	-1.07241	-0.100863	1.18155	0.240683	1.26711	0.341546	UNKNOWN
C068R013	0.000149134	0.21314	0.373464	1.25296	0.32534	1.87314	0.905456	-1.04912	-0.06918	1.49497	0.580116	-1.44007	-0.526141	1.11348	0.155076	-1.09552	-0.131621	2.18815	1.12971	2.39717	1.26133	UNKNOWN
C142R013	0.000478785	0.330135	0.0799814	1.6332	0.7077	2.06297	1.04472	-1.22859	-0.297001	1.26314	0.33702	-1.69183	-0.758585	-1.02648	-0.0377064	1.18601	0.246116	2.46915	1.30401	2.0819	1.0579	Cathepsin S precursor	403400	Cfa.1661
C170R013	0.000668731	0.0536803	0.00422076	-1.6751	-0.744244	-1.34409	-0.426634	-1.01588	-0.0227293	1.24626	0.31761	1.36854	0.452634	1.61776	0.693998	-1.20487	-0.268881	1.22272	0.290093	1.47322	0.558974	Leucine-rich repeat-containing G-protein coupled receptor 4 precursor	55366	Hs.502176
C187R013	0.000954189	0.0995617	0.000281077	1.22344	0.290944	1.72834	0.789385	1.29036	0.367771	1.41269	0.498441	2.7968	1.48377	2.67924	1.42183	2.65176	1.40695	3.58865	1.84344	1.35331	0.436493	Proteasome subunit beta type-6 precursor	510069	Bt.2116
C011R014	0.00592352	0.0775319	0.00668621	-1.09762	-0.134383	1.08325	0.115364	-1.007	-0.0100617	1.189	0.249746	1.19994	0.262959	1.3061	0.385267	1.10087	0.138638	1.42473	0.510692	1.29419	0.372054	UNKNOWN
C016R014	0.000275036	0.708142	0.00364861	1.52269	0.606623	1.20575	0.269931	-1.29143	-0.368975	-1.26286	-0.336691	-1.4043	-0.48985	-1.18363	-0.243218	1.40031	0.485748	1.31557	0.395688	-1.06441	-0.0900596	Receptor expression-enhancing protein 5
C048R014	0.000605997	0.236883	5.38355e-11	1.23115	0.300001	1.55297	0.635029	2.79904	1.48493	1.2614	0.335028	3.57337	1.83729	5.02624	2.32948	1.57173	0.652353	2.78867	1.47957	1.77427	0.827222	Tapasin precursor	21356	Mm.154457; Mm.392082
C071R014	0.00122093	0.447046	0.167828	1.48556	0.571008	1.34301	0.425475	1.18014	0.238958	-1.10614	-0.145533	-1.01724	-0.0246665	1.20739	0.271897	1.23746	0.307383	1.37403	0.458414	1.11036	0.15103	UNKNOWN
C100R014	0.00162162	0.283284	4.97629e-07	1.38301	0.467813	1.28369	0.360292	1.73603	0.795788	-1.07738	-0.107521	2.2542	1.17261	2.91373	1.54287	1.79581	0.844637	2.15453	1.10737	1.19975	0.262735	Antigen peptide transporter 1
C172R014	0.00031053	0.901472	0.0452294	1.14228	0.19192	1.06306	0.0882261	-1.08644	-0.119605	-1.07452	-0.103694	-1.05693	-0.0798838	-1.0606	-0.084877	1.17417	0.231641	1.08896	0.122954	-1.07825	-0.108687	NADH-ubiquinone oxidoreductase 75 kDa subunit, mitochondrial precursor	4719	Hs.471207
C173R014	0.00616583	0.199689	0.0123082	-1.0788	-0.109433	-1.09911	-0.136337	-1.02215	-0.0316093	-1.01882	-0.0269035	-1.1239	-0.168518	-1.30442	-0.383403	-1.1862	-0.246342	-1.40263	-0.488131	-1.18246	-0.241789	Mitochondrial import inner membrane translocase subunit Tim8 A	445243; 554762	Dr.30891
C194R014	0.00901698	0.98738	0.674452	-1.22004	-0.286924	-1.19074	-0.251862	-1.03452	-0.0489665	1.0246	0.0350618	-1.03457	-0.0490358	-1.01015	-0.0145696	-1.22009	-0.286993	-1.16269	-0.217465	1.04937	0.069528	Nuclear cap-binding protein subunit 2	22916	Hs.591671
C226R014	0.0025799	0.593104	0.531349	1.25465	0.327284	1.13234	0.179306	1.03079	0.0437513	-1.10802	-0.147978	-1.062	-0.0867871	-1.06151	-0.0861135	1.14611	0.196746	1.03486	0.0494415	-1.1075	-0.147304	Protein SLC7A6OS	492472	Dr.79100
C240R014	0.00998895	0.0868688	0.000821599	-1.21605	-0.282199	-1.2528	-0.325159	1.28602	0.362917	-1.03023	-0.0429604	1.09879	0.135912	1.85764	0.893468	-1.42326	-0.509204	1.153	0.205392	1.64102	0.714596	Protein CDV3 homolog	334102	Dr.32980
C017R015	2.19986e-07	0.719549	0.613238	1.65779	0.729259	9.78222	3.29016	1.10681	0.146403	5.90076	2.5609	-1.28604	-0.362931	-1.21128	-0.27653	1.16467	0.219926	7.29662	2.86723	6.26495	2.6473	Ig mu chain C region membrane-bound form
C034R015	2.90674e-06	0.747725	0.129196	1.77007	0.823806	6.00696	2.58664	-1.24492	-0.316053	3.39363	1.76283	-1.6945	-0.760858	-1.27705	-0.352811	1.30044	0.379001	5.85584	2.54988	4.50297	2.17088	Ig kappa chain V region K29-213
C080R015	1.70533e-05	0.0563004	0.014217	1.39639	0.4817	1.22784	0.296125	-1.18532	-0.245283	-1.13727	-0.185575	-1.35084	-0.433857	1.05426	0.0762371	1.22529	0.293126	1.53437	0.617645	1.25225	0.324519	Receptor expression-enhancing protein 5	7905	Hs.429608
C106R015	0.00793687	0.702791	0.00890004	-1.05932	-0.0831322	1.12631	0.171602	1.09905	0.136258	1.19312	0.254734	1.12468	0.16951	1.22646	0.294495	-1.03518	-0.0498802	1.25687	0.329839	1.30109	0.379719	Transposable element Tcb1 transposase
C108R015	0.00457442	0.325041	0.133325	1.04395	0.0620492	-1.30417	-0.383128	-1.22059	-0.287582	-1.36148	-0.445177	-1.0756	-0.105135	1.0096	0.0137881	1.18468	0.244496	-1.05831	-0.0817572	-1.25375	-0.326253	Cation transport regulator-like protein 1	100007403; 563855	Dr.119543; Dr.119610
C116R015	0.000175033	0.76457	0.223981	1.26224	0.335987	1.01034	0.0148365	-1.11628	-0.158698	-1.24933	-0.32115	-1.07891	-0.109575	-1.00873	-0.0125347	1.30596	0.385109	1.11806	0.160999	-1.16806	-0.22411	UNKNOWN
C141R015	0.000553103	0.031596	1.53534e-10	-1.00453	-0.00651491	1.4966	0.581688	2.17476	1.12086	1.50337	0.588202	4.21183	2.07445	4.01986	2.00715	1.92796	0.947076	2.76634	1.46798	1.43485	0.520902	Interferon-induced helicase C domain-containing protein 1	64135	Hs.163173
C237R015	0.00208273	0.21952	0.00981212	1.39314	0.478336	1.43273	0.518762	-1.2906	-0.368042	1.02842	0.040427	-1.06908	-0.0963758	-1.77379	-0.826838	1.68179	0.750002	1.04244	0.0599669	-1.61332	-0.690035	RNA 3'-terminal phosphate cyclase-like protein	59028	Mm.28630
C027R016	0.000250616	0.284595	0.210605	-1.14476	-0.19504	-1.29134	-0.368873	1.01008	0.0144632	-1.12805	-0.173833	-1.18811	-0.248666	-1.0557	-0.0781997	-1.3738	-0.458169	-1.37701	-0.461535	-1.00234	-0.00336613	110124 pfam01101, HMG14_17, HMG14 and HMG17.
C057R016	0.000268136	0.0418595	0.216209	1.29589	0.373942	1.54827	0.630653	-1.06501	-0.0908709	1.19475	0.256711	-1.51788	-0.60206	1.15491	0.207781	-1.0998	-0.137248	1.90436	0.929305	2.09442	1.06655	COUP transcription factor 2	386585	Gga.4445
C097R016	0.00467089	0.277925	0.000950967	-1.20707	-0.271512	-1.37806	-0.462639	1.33911	0.421273	-1.14166	-0.191128	1.13412	0.181575	1.56813	0.649049	-1.42524	-0.51121	-1.1768	-0.234863	1.21112	0.276346	Endothelin B receptor-like protein 2 precursor	9283	Hs.132049
C172R016	0.00174473	0.701964	0.79497	1.05755	0.0807205	1.24783	0.319424	-1.04024	-0.0569154	1.17993	0.238704	1.03287	0.0466576	-1.02765	-0.0393519	1.13626	0.184293	1.26312	0.336988	1.11164	0.152694	UNKNOWN
C244R016	0.00787107	0.956077	0.381612	-1.27748	-0.353298	-1.80192	-0.849536	-1.08189	-0.113551	-1.41053	-0.496239	-1.17761	-0.235862	-1.14635	-0.197048	-1.3905	-0.475609	-1.90928	-0.933032	-1.37309	-0.457424	Hemoglobin subunit beta-1
C111R017	0.00138555	0.459341	1.76294e-05	1.26164	0.3353	1.03473	0.0492496	-1.18981	-0.250728	-1.2193	-0.286051	-1.32813	-0.409398	-1.35287	-0.436024	1.13024	0.176631	-1.09889	-0.136047	-1.24201	-0.312677	Glyceraldehyde-3-phosphate dehydrogenase	374193	Gga.6383
C112R017	0.00856859	0.213916	7.75133e-05	1.37588	0.460358	1.15031	0.202028	-1.36254	-0.446295	-1.19609	-0.25833	-1.63523	-0.709495	-1.19628	-0.25855	1.14644	0.197158	1.31019	0.389773	1.14283	0.192615	Eukaryotic translation initiation factor 3 subunit K	515326	Bt.53466
C120R017	0.00159665	0.128735	0.379946	1.06153	0.0861477	1.7038	0.768757	-1.73115	-0.791729	1.60504	0.68261	1.09162	0.12647	1.0353	0.0500487	2.00603	1.00435	3.05365	1.61053	1.52223	0.606188	60S acidic ribosomal protein P2	100034001	Eca.137
C140R017	0.00245464	0.0356645	0.569301	1.16239	0.217095	1.26599	0.340263	1.07095	0.0988844	1.08912	0.123168	1.05826	0.081692	-1.21006	-0.275079	1.14862	0.199903	-1.02363	-0.0337006	-1.17577	-0.233604	Major facilitator superfamily domain-containing protein 5
C164R017	0.00212973	0.0553274	0.571986	1.21836	0.284945	1.31842	0.398809	1.14436	0.194537	1.08212	0.113863	1.13028	0.176682	-1.18937	-0.250196	1.20338	0.267091	-1.03234	-0.045924	-1.2423	-0.313014	UNKNOWN
C175R017	0.00539223	0.0573739	0.291391	1.01136	0.0162931	-1.05026	-0.0707453	-1.02689	-0.0382866	-1.06219	-0.0870384	1.08959	0.123782	-1.22032	-0.287255	1.1316	0.178362	-1.24808	-0.319714	-1.41233	-0.498076	UNKNOWN
C218R017	0.00813629	0.493186	0.222926	1.42557	0.511543	1.17156	0.228433	1.01542	0.0220695	-1.21682	-0.28311	-1.1817	-0.240862	-1.15248	-0.204741	1.18806	0.248611	1.00112	0.00162199	-1.18673	-0.246989	Ras-related protein Rap-1b precursor	100048397; 215449	Mm.233009; Mm.392484; Mm.458427
C260R017	0.00330654	0.712495	0.667911	-1.00437	-0.00628471	1.2978	0.376066	1.00983	0.0141145	1.30346	0.382351	-1.03786	-0.0536187	1.12971	0.175954	-1.05264	-0.0740179	1.45186	0.537905	1.5283	0.611923	Polycystic kidney disease protein 1-like 3 precursor	244646	Mm.436810
C014R018	0.000215145	0.250571	0.814815	1.12273	0.167017	1.23076	0.299546	-1.05636	-0.0791078	1.09621	0.132529	1.10554	0.144754	-1.01292	-0.0185165	1.31119	0.390879	1.28355	0.360137	-1.02154	-0.0307412	UNKNOWN
C015R018	0.00111791	0.932913	0.607443	1.11691	0.159519	1.966	0.975265	1.10039	0.138012	1.76021	0.815746	1.00727	0.010451	1.10028	0.13787	1.0224	0.0319576	1.96581	0.975122	1.92274	0.943165	Potassium channel subfamily K member 15	60598	Hs.528664
C073R018	0.00993675	0.550024	0.0358737	-1.27011	-0.344956	-1.27778	-0.353643	1.05353	0.0752305	-1.00604	-0.00868757	1.13685	0.185042	1.25906	0.332351	-1.17702	-0.235144	-1.06919	-0.0965224	1.10085	0.138622	Bleomycin hydrolase	395996	Gga.4171
C082R018	0.00677966	0.152736	0.645126	-1.15177	-0.203856	-1.16344	-0.218393	-1.08214	-0.113882	-1.01013	-0.0145379	-1.11751	-0.160292	1.13428	0.181775	-1.18943	-0.250265	1.05502	0.0772636	1.25486	0.327528	UNKNOWN
C113R018	0.00238974	0.19057	0.02691	1.10851	0.148628	-1.00588	-0.008455	-1.02549	-0.0363113	-1.11503	-0.157083	-1.04039	-0.0571191	-1.23869	-0.308817	1.09264	0.12782	-1.215	-0.280961	-1.32756	-0.408782	Histone H3.3	117056	Rn.124815; Rn.198918; Rn.29857
C143R018	0.00459989	0.102733	0.134361	1.0784	0.108898	1.09628	0.13261	-1.07664	-0.106542	1.01657	0.023712	1.08743	0.120918	1.30428	0.383253	1.26257	0.336359	1.53944	0.622406	1.21929	0.286047	UNKNOWN
C149R018	0.00272648	0.783201	0.000997342	1.32258	0.403351	1.64123	0.714776	1.4859	0.571342	1.24093	0.311424	1.38219	0.46696	1.70739	0.771792	1.23027	0.298969	1.88586	0.915226	1.53289	0.616257	UNKNOWN
C172R018	0.000817371	0.306694	0.665838	1.09799	0.134871	1.16393	0.219001	-1.10318	-0.141666	1.06005	0.0841298	-1.04947	-0.0696551	1.0917	0.12658	1.15419	0.206881	1.40177	0.487247	1.2145	0.280365	Double-strand break repair protein MRE11A	64046	Rn.209040
C191R018	0.00458838	0.233871	0.800324	-1.13267	-0.179727	-1.29084	-0.368312	1.04069	0.0575388	-1.13965	-0.188586	-1.13184	-0.178671	1.14026	0.18936	-1.33416	-0.415936	-1.17812	-0.236492	1.13245	0.179444	Histone H2A.Z	426361	Gga.4671
C217R018	0.0046178	0.0693239	0.00188152	1.17587	0.233732	-1.12117	-0.165009	-1.02319	-0.033068	-1.31836	-0.398741	-1.35129	-0.434336	-1.3944	-0.479648	-1.12314	-0.167536	-1.52794	-0.611589	-1.36042	-0.444053	UNKNOWN
C236R018	0.000638198	0.875587	0.0143033	1.36421	0.448063	1.03038	0.0431756	-1.15017	-0.201841	-1.32399	-0.404887	-1.23291	-0.302064	-1.18944	-0.250277	1.27265	0.34784	-1.00365	-0.00526054	-1.2773	-0.353101	Macrophage migration inhibitory factor	4282	Hs.407995
C250R018	0.00154257	0.377668	0.356289	-1.15462	-0.207416	-1.20645	-0.270763	1.03915	0.0554066	-1.04489	-0.0633471	-1.15048	-0.202239	-1.07818	-0.108601	-1.38038	-0.465061	-1.3517	-0.434771	1.02122	0.0302908	UNKNOWN
C014R019	0.000207444	0.440286	0.410239	1.55978	0.641345	1.47859	0.564226	-1.18062	-0.239549	-1.05491	-0.0771185	-1.24607	-0.317386	1.13607	0.184049	1.47786	0.563507	1.98319	0.987824	1.34194	0.424317	Ceruloplasmin precursor	1356	Hs.558314
C048R019	0.000148344	0.44974	0.00776004	-1.23779	-0.307766	-1.24731	-0.318823	1.18223	0.241515	-1.00769	-0.0110575	1.06755	0.0943004	1.26141	0.335033	-1.37076	-0.45498	-1.16902	-0.225305	1.17257	0.229675	Sarcoplasmic/endoplasmic reticulum calcium ATPase 2	396875	Ssc.22641
C055R019	0.00168267	0.0106644	0.318689	-1.02095	-0.0299072	1.09766	0.134436	1.18225	0.241537	1.12066	0.164343	-1.04421	-0.0624135	-1.02168	-0.0309469	-1.26038	-0.333858	-1.10042	-0.138048	1.14537	0.19581	Transmembrane protein 33	55161	Hs.31082
C062R019	0.00480595	0.0136842	2.09664e-05	3.54869	1.82729	1.2072	0.27166	-1.70192	-0.76716	-2.93961	-1.55563	-5.56487	-2.47635	-2.0221	-1.01586	1.0853	0.118097	1.01604	0.0229632	-1.06816	-0.0951343	Ependymin-2 precursor
C079R019	0.000834102	0.737953	4.99339e-05	-1.25593	-0.328754	-1.13074	-0.177264	1.24122	0.311758	1.11072	0.15149	1.24718	0.318667	1.37693	0.461455	-1.24993	-0.321844	-1.01929	-0.0275668	1.22627	0.294277	Chondroadherin precursor	12643	Mm.440523
C121R019	0.000232618	0.548735	0.568094	1.84432	0.883087	1.89866	0.924979	1.09181	0.12672	1.02946	0.0418916	-1.16373	-0.218753	-1.14293	-0.192734	1.45157	0.537614	1.52153	0.605525	1.0482	0.0679107	UNKNOWN
C144R019	0.00285269	0.305724	0.219286	1.35196	0.435052	1.39775	0.483102	-1.03231	-0.0458717	1.03387	0.0480502	-1.2728	-0.348	-1.00707	-0.0101594	1.09651	0.132924	1.43278	0.518815	1.30667	0.385891	Septin-7	989	Hs.191346
C168R019	9.26696e-08	0.559977	0.206949	-2.07591	-1.05374	-2.32838	-1.21932	1.07613	0.105858	-1.12162	-0.165581	1.30559	0.384705	1.04765	0.0671539	-1.71107	-0.774896	-2.39169	-1.25803	-1.39777	-0.483132	Transforming growth factor-beta-inducible early growth response protein 3		Mm.9616
C170R019	0.00590804	0.148355	0.937164	-1.35865	-0.442178	-1.03119	-0.0443118	1.22648	0.294522	1.31756	0.397866	1.12035	0.163943	-1.40862	-0.494286	-1.48736	-0.572757	-1.78153	-0.83312	-1.19778	-0.260363	Apoptotic protease-activating factor 1	58131	Dr.78833
C203R019	0.000702992	0.60348	0.124401	1.20292	0.266543	1.08462	0.117193	-1.07618	-0.105913	-1.10907	-0.14935	-1.11359	-0.155216	-1.00361	-0.00519962	1.16251	0.217239	1.16304	0.217906	1.00046	0.000666482	40S ribosomal protein S15
C259R019	2.69995e-05	0.211894	0.32743	-1.51592	-0.600194	-1.22723	-0.295404	1.1834	0.242934	1.23524	0.30479	1.22369	0.29124	-1.15632	-0.209542	-1.466	-0.551888	-1.67932	-0.74788	-1.14551	-0.195992	UNKNOWN
C002R020	0.000245962	0.373833	0.0117548	-1.11307	-0.154542	-1.21033	-0.275405	-1.05717	-0.0802125	-1.08739	-0.120863	-1.08755	-0.121076	-1.24886	-0.320609	-1.14505	-0.195405	-1.42979	-0.515801	-1.24867	-0.320396	Tropomyosin-1 alpha chain
C006R020	1.9754e-05	0.810753	0.0646423	1.40958	0.495266	1.61367	0.690343	-1.12647	-0.171814	1.14478	0.195076	-1.21984	-0.286696	-1.10256	-0.140857	1.30169	0.380383	1.64867	0.721299	1.26656	0.340916	Integral membrane protein 2B	395969	Gga.9467
C067R020	0.000799122	0.14437	0.64015	-1.1134	-0.15497	-1.12424	-0.168954	1.12077	0.164494	-1.00974	-0.0139831	-1.08868	-0.122579	1.04107	0.0580617	-1.35853	-0.442043	-1.21032	-0.275385	1.12245	0.166658	Protein disulfide-isomerase A3 precursor	373899	Gga.3802
C081R020	0.00527039	0.0249918	0.00193332	1.25959	0.332949	1.23919	0.309399	-1.02111	-0.0301361	-1.01646	-0.0235496	-1.28701	-0.364023	-1.14208	-0.19167	-1.00065	-0.00093855	1.10793	0.147865	1.10865	0.148804	Eukaryotic translation initiation factor 3 subunit K	515326	Bt.53466
C155R020	0.00291448	0.791871	0.243267	-1.38539	-0.470292	-1.08649	-0.119674	1.23483	0.30431	1.27511	0.350618	1.08517	0.117923	1.07785	0.108154	-1.57645	-0.656679	-1.24473	-0.31583	1.2665	0.340849	Neuron navigator 2	89797	Hs.502116; Hs.551898; Hs.639427; Hs.639428
C162R020	2.47609e-05	0.217834	0.000429183	1.90591	0.930479	1.34147	0.423819	-1.48941	-0.57474	-1.42076	-0.506661	-1.84141	-0.880813	-1.17434	-0.231853	1.54158	0.624406	1.70138	0.766706	1.10366	0.1423	Annexin A5	428767	Gga.1168
C190R020	4.09727e-05	0.484622	0.765496	-1.40649	-0.492096	-1.32106	-0.401701	-1.08969	-0.123917	1.06466	0.0903952	1.04452	0.0628386	-1.00561	-0.00807361	-1.23571	-0.305341	-1.21913	-0.285857	1.0136	0.019483	Ribonucleoside-diphosphate reductase large subunit	30740	Dr.33356
C197R020	0.00560078	0.787666	0.300488	1.22082	0.287849	1.12727	0.172839	-1.05237	-0.0736393	-1.08298	-0.11501	-1.10389	-0.142601	-1.01119	-0.0160501	1.16384	0.218888	1.17318	0.230428	1.00803	0.0115403	Complement C4-A precursor	720	Hs.534847; Hs.655564
C248R020	1.97269e-11	0.681502	0.216772	-2.70337	-1.43476	-2.30055	-1.20198	1.24858	0.320291	1.1751	0.23278	1.1484	0.19963	1.00138	0.00199327	-2.93919	-1.55542	-2.86846	-1.52028	1.02466	0.0351431	Hydroxymethylglutaryl-CoA synthase, cytoplasmic
C020R021	0.00120628	0.393395	0.920044	1.2296	0.298191	1.42881	0.514819	1.02951	0.0419613	1.16201	0.216628	1.09914	0.136369	-1.15409	-0.206761	1.31276	0.392599	1.20255	0.266097	-1.09164	-0.126502	U3 small nucleolar ribonucleoprotein protein IMP4	27993	Mm.291745
C023R021	0.000411075	0.0364723	7.88279e-09	2.15556	1.10806	2.74233	1.4554	-1.95148	-0.964569	1.27221	0.34734	-4.04704	-2.01687	-3.18766	-1.6725	1.03941	0.0557612	1.67885	0.747469	1.61519	0.691708	Ependymin precursor
C058R021	0.000128381	0.927872	0.102915	1.13411	0.181564	2.03652	1.02611	1.15772	0.211289	1.7957	0.844544	1.20309	0.266744	1.30698	0.386241	1.17855	0.237018	2.29909	1.20106	1.95077	0.964042	UNKNOWN
C073R021	0.00386656	0.181357	0.908273	1.58451	0.664033	1.11831	0.161323	-1.09843	-0.135449	-1.41687	-0.50271	-1.23831	-0.308372	1.41443	0.500218	1.40553	0.49111	1.73747	0.79699	1.23617	0.30588	UNKNOWN
C090R021	1.90735e-06	0.469378	1.31739e-06	2.04467	1.03187	1.90689	0.931222	-1.64341	-0.716694	-1.07226	-0.100648	-2.09354	-1.06594	-1.74807	-0.80576	1.60506	0.682623	1.79273	0.842156	1.11693	0.159533	GTP-binding nuclear protein Ran
C138R021	0.0087978	0.989284	0.224197	4.7485	2.24747	6.97802	2.80282	-1.87671	-0.908204	1.46952	0.555345	-2.14527	-1.10116	-1.8135	-0.858774	4.15404	2.05452	7.22125	2.85225	1.73837	0.797733	Pro-MCH 1 precursor
C158R021	0.00224381	0.839639	0.18739	1.2588	0.332047	1.26474	0.338842	-1.14117	-0.190517	1.00472	0.00679436	-1.04882	-0.0687617	-1.12328	-0.167719	1.36965	0.453803	1.28489	0.36164	-1.06597	-0.0921632	Ectonucleotide pyrophosphatase/phosphodiesterase family member 4 precursor	550586	Dr.91177
C184R021	0.000195838	0.444913	0.0218786	1.27686	0.352602	1.49696	0.582038	1.09202	0.126998	1.17238	0.229436	1.19917	0.26204	1.49783	0.582875	1.40215	0.487644	2.05326	1.03792	1.46436	0.550272	fMet-Leu-Phe receptor
C205R021	1.20692e-05	0.874059	0.0101318	1.6825	0.750604	1.6873	0.754712	-1.20118	-0.264457	1.00285	0.00410846	-1.28918	-0.366459	-1.33729	-0.419314	1.56765	0.648602	1.51557	0.599856	-1.03437	-0.0487464	UNKNOWN
C216R021	0.00990967	0.258934	0.0974123	1.15165	0.203699	-1.12858	-0.174505	-1.01287	-0.0184435	-1.29972	-0.378204	-1.18666	-0.246905	-1.06165	-0.0863038	-1.01731	-0.0247628	-1.18293	-0.242365	-1.1628	-0.217602	NADH dehydrogenase [ubiquinone] 1 beta subcomplex subunit 4	100041273; 100042503; 68194	Mm.379154; Mm.390788
C012R022	0.00724809	0.355042	8.47838e-07	1.06021	0.0843458	2.40555	1.26636	3.31024	1.72694	2.26894	1.18202	7.04246	2.81608	6.34527	2.66568	2.25556	1.17349	4.61109	2.20511	2.04432	1.03162	UNKNOWN
C056R022	0.00115226	0.273596	0.00146562	-1.25918	-0.332483	-1.0715	-0.0996288	1.13543	0.183237	1.17516	0.232854	1.15798	0.211612	1.47428	0.560007	-1.23465	-0.304108	1.21179	0.277141	1.49614	0.581249	Gametogenetin-binding protein 2	425053	Gga.19170
C094R022	0.0012438	0.147167	0.843206	-1.22308	-0.290516	-1.64515	-0.718215	1.11244	0.153722	-1.34509	-0.427699	-1.28726	-0.364305	1.23225	0.301295	-1.75144	-0.808542	-1.48518	-0.570641	1.17928	0.237901	Cell division cycle protein 20 homolog
C202R022	3.45531e-05	0.501053	0.010986	1.79719	0.845744	1.40712	0.492748	-1.12007	-0.163595	-1.27721	-0.352996	-1.29328	-0.371037	-1.48449	-0.569967	1.5565	0.638303	1.0617	0.0863757	-1.46604	-0.551927	NFU1 iron-sulfur cluster scaffold homolog		Hs.430439
C255R022	4.87054e-06	0.569894	0.513905	1.86075	0.895883	2.23518	1.16039	1.07624	0.105999	1.20123	0.264508	-1.09175	-0.126637	-1.20622	-0.270491	1.58364	0.663247	1.72178	0.7839	1.08723	0.120653	Succinyl-CoA:3-ketoacid-coenzyme A transferase 1, mitochondrial precursor	396978	Ssc.11096
C008R023	0.00880291	0.580179	0.0848743	-1.21069	-0.275831	-1.20686	-0.271258	1.30919	0.388678	1.00317	0.00457227	1.16146	0.215944	1.04306	0.0608232	-1.36468	-0.448565	-1.51479	-0.599113	-1.10999	-0.150548	Metalloreductase STEAP3	55240	Hs.647822
C040R023	1.88311e-05	0.334676	0.798233	-1.29287	-0.370575	-1.50566	-0.590398	1.0871	0.120485	-1.16459	-0.219823	-1.12033	-0.16393	1.08829	0.122066	-1.5746	-0.654989	-1.50401	-0.588817	1.04694	0.0661723	Histone H3.3	117056	Rn.124815; Rn.198918; Rn.29857
C055R023	0.000106899	0.448804	0.0492194	1.42822	0.514218	2.2464	1.16761	-1.32692	-0.408085	1.57286	0.653394	-1.66255	-0.7334	-1.06168	-0.0863475	1.1399	0.188903	2.80762	1.48935	2.46305	1.30045	Ig kappa chain V region Mem5
C078R023	0.00745711	0.882643	0.955978	1.2019	0.265313	1.33186	0.413447	1.03053	0.0433934	1.10814	0.148135	-1.03518	-0.0498791	1.01561	0.0223459	1.12665	0.17204	1.31258	0.3924	1.16502	0.22036	Protein DEK	7913	Hs.695957
C091R023	0.00749334	0.76599	0.145556	-1.28639	-0.36333	-1.41356	-0.499333	1.13654	0.184648	-1.09886	-0.136003	1.05583	0.0783837	1.25715	0.330156	-1.38472	-0.469594	-1.27794	-0.353825	1.08355	0.115769	Cytochrome P450 51A1	403334	Ssc.5712
C229R023	0.00373504	0.379166	0.000178434	1.50172	0.586617	1.15078	0.202616	-1.45773	-0.54372	-1.30496	-0.384001	-1.71451	-0.777796	-1.25092	-0.322988	1.27681	0.352542	1.34104	0.423348	1.0503	0.0708064	Annexin A5	428767	Gga.1168
C045R024	0.00433181	0.570531	0.360436	-1.31513	-0.395205	-1.0201	-0.0287049	1.05515	0.0774514	1.28922	0.3665	1.15731	0.210777	-1.02282	-0.0325553	-1.19904	-0.261879	-1.10092	-0.138712	1.08912	0.123168	Transducin-like enhancer protein 3	7090	Hs.287362
C056R024	0.000976896	0.0207488	0.161579	1.56775	0.648697	1.2896	0.366928	1.58681	0.666131	-1.21568	-0.281769	1.23624	0.305954	-1.3119	-0.391657	1.22139	0.28852	-1.61425	-0.690861	-1.97162	-0.97938	UNKNOWN
C065R024	0.00884884	0.986466	0.0197709	-1.22815	-0.296481	-1.19273	-0.254263	1.18467	0.24448	1.0297	0.0422184	1.16134	0.21579	1.18637	0.246553	-1.25281	-0.325172	-1.19101	-0.25219	1.05189	0.072982	Protein disulfide-isomerase A6 precursor	10130	Hs.212102
C078R024	0.0046377	0.0114649	0.402758	1.14843	0.199659	1.13541	0.183209	-1.04448	-0.0627785	-1.01147	-0.0164495	-1.27118	-0.346172	1.65859	0.729953	-1.05976	-0.0837348	1.96692	0.975941	2.08446	1.05968	UNKNOWN
C096R024	0.000342556	0.183516	0.0313995	-1.0817	-0.113301	-1.10447	-0.143349	-1.00566	-0.00814085	-1.02105	-0.0300481	-1.1381	-0.186626	-1.09075	-0.125322	-1.22416	-0.291787	-1.19792	-0.26053	1.0219	0.0312565	Voltage-dependent anion-selective channel protein 2
C098R024	0.00568904	0.699629	0.00309344	-1.26129	-0.334905	-1.06889	-0.0961082	1.28337	0.359942	1.18001	0.238797	1.19341	0.255092	1.42745	0.513436	-1.35637	-0.439756	1.04058	0.0573852	1.41141	0.497141	La-related protein 1		Mm.248843
C099R024	0.000446612	0.774145	0.00947648	-1.23354	-0.302808	1.01491	0.0213569	1.2117	0.277037	1.25194	0.324165	1.16541	0.220842	1.09776	0.134564	-1.28254	-0.359003	-1.08758	-0.121116	1.17926	0.237887	AP-3 complex subunit delta-1	11776	Mm.209294
C212R024	0.000164466	0.456912	0.000170723	-1.29961	-0.378075	1.04258	0.0601641	1.27048	0.345379	1.35495	0.438239	1.26206	0.335777	1.58252	0.662222	-1.30829	-0.387677	1.29864	0.377006	1.699	0.764683	ELAV-like protein 2	15569	Mm.318042
C243R024	0.000726445	0.601358	0.858545	-1.13033	-0.176742	-1.29661	-0.374747	-1.02911	-0.0413942	-1.14711	-0.198004	-1.02245	-0.032036	1.07482	0.104095	-1.12302	-0.167384	-1.17223	-0.229257	-1.04382	-0.0618732	Eukaryotic translation initiation factor 1b	10289	Hs.315230
C001R025	0.00549607	0.257016	0.158345	-1.15393	-0.206559	-1.18169	-0.240851	-1.06777	-0.094596	-1.02405	-0.0342921	1.03285	0.0466269	-1.19446	-0.256357	-1.04633	-0.0653361	-1.3219	-0.402612	-1.26337	-0.337276	Inositol hexakisphosphate kinase 2	100009233	Ocu.2563
C048R025	0.00927209	0.890697	0.393593	-1.19706	-0.259497	-1.04298	-0.0607151	-1.01977	-0.0282425	1.14773	0.198782	-1.03646	-0.0516612	-1.09537	-0.131415	-1.21665	-0.282916	-1.1203	-0.163888	1.086	0.119028	UNKNOWN
C058R025	2.0563e-05	0.965167	0.235804	1.24109	0.311608	1.42435	0.510307	1.04958	0.0698109	1.14766	0.198699	1.06503	0.0908892	1.09021	0.124604	1.25936	0.332687	1.47949	0.565101	1.1748	0.232414	Non-receptor tyrosine-protein kinase TYK2	7297	Hs.75516
C068R025	6.19888e-06	0.45198	0.851107	-1.31135	-0.391055	-1.39786	-0.483215	-1.00145	-0.00208679	-1.06597	-0.0921602	-1.10697	-0.146613	1.07418	0.103242	-1.44953	-0.535581	-1.29944	-0.377886	1.1155	0.157695	Tubulin beta-2C chain	10383	Hs.433615
C166R025	0.00287777	0.0998231	0.317855	1.34824	0.431079	1.36138	0.445065	1.06076	0.0850992	1.00974	0.0139868	-1.1781	-0.236462	1.49012	0.575433	1.07887	0.109518	1.91242	0.935399	1.77262	0.825882	UNKNOWN
C180R025	1.37988e-06	0.842441	0.200079	-1.27864	-0.354607	-1.45905	-0.545027	1.02472	0.0352339	-1.1411	-0.19042	1.06592	0.0921049	1.08964	0.123846	-1.22921	-0.297736	-1.37213	-0.456415	-1.11626	-0.158679	UNKNOWN
C186R025	0.00228184	0.164285	0.0188726	1.14227	0.191907	-1.04747	-0.0669142	-1.40256	-0.488058	-1.1965	-0.258821	-1.03255	-0.0462145	-1.23407	-0.303424	1.55159	0.63375	1.08502	0.117719	-1.43002	-0.516031	Splicing factor, arginine/serine-rich 7	225027	Mm.292016
C214R025	0.00343879	0.680106	0.362496	1.20291	0.266535	1.01862	0.0266096	1.00882	0.012673	-1.18093	-0.239925	-1.04341	-0.0612995	-1.10991	-0.15044	1.14279	0.192562	-1.09924	-0.136504	-1.2562	-0.329066	LYR motif-containing protein 1	57149	Hs.185489
C262R025	1.0423e-05	0.250855	0.513027	-1.40812	-0.493766	-1.22339	-0.29088	1.11376	0.155432	1.151	0.202885	-1.04226	-0.0597109	-1.23594	-0.305603	-1.63457	-0.708909	-1.68403	-0.751916	-1.03026	-0.043007	Isopentenyl-diphosphate Delta-isomerase 1
C004R026	0.00442871	0.0676032	0.772138	-1.05692	-0.0798709	-1.25915	-0.332446	1.52036	0.604415	-1.19133	-0.252576	1.25416	0.326723	-1.67672	-0.745646	-1.28126	-0.357563	-3.20985	-1.68251	-2.50523	-1.32494	Short stature homeobox protein	6473	Hs.105932
C044R026	0.00816543	0.664297	0.0242912	-1.44949	-0.535547	-1.18755	-0.247989	-1.22437	-0.292038	1.22057	0.287558	-1.15336	-0.205849	-1.47736	-0.563023	-1.36543	-0.449359	-1.43294	-0.518975	-1.04944	-0.0696164	UNKNOWN
C112R026	0.0006732	0.832343	0.0894802	1.54663	0.629124	2.74522	1.45692	-1.24154	-0.312134	1.77497	0.827795	-1.52423	-0.608085	-1.30511	-0.384171	1.25978	0.333174	2.61151	1.38488	2.07298	1.05171	Ig kappa chain V region Mem5
C127R026	0.00763107	0.53155	0.956126	1.22494	0.292706	-1.25632	-0.329202	-1.0279	-0.0396938	-1.53891	-0.621907	-1.10972	-0.150193	1.1266	0.171972	1.13462	0.182206	-1.08488	-0.117536	-1.23092	-0.299742	Phosphoinositide-3-kinase-interacting protein 1 precursor	386643	Dr.78563
C135R026	0.00507365	0.0493062	0.00099474	-1.0997	-0.137112	1.0142	0.0203398	1.06582	0.0919572	1.11532	0.157452	1.13159	0.178348	1.57965	0.659609	-1.03578	-0.0507221	1.50315	0.587992	1.55694	0.638714	Lysosome-associated membrane glycoprotein 2 precursor	16784	Mm.486
C148R026	0.00455215	0.619133	0.295522	1.21714	0.283496	1.2131	0.278703	1.08741	0.120895	-1.00333	-0.00479314	-1.00738	-0.010611	1.08402	0.116391	1.1111	0.15199	1.20932	0.274199	1.0884	0.122209	Selenoprotein S	735249	Dr.77775
C150R026	0.00352566	0.136513	0.000297363	-1.11928	-0.16257	1.06599	0.0921928	1.08475	0.117365	1.19314	0.254763	1.22604	0.294002	1.43579	0.521848	1.0098	0.0140664	1.41096	0.496676	1.39727	0.48261	Transposable element Tc1 transposase
C155R026	0.00337117	0.194858	0.0229336	-1.06253	-0.0875075	-1.08322	-0.115326	1.13002	0.176348	-1.01947	-0.0278187	1.00607	0.00872735	1.10996	0.15051	-1.19344	-0.255128	-1.10279	-0.141164	1.0822	0.113964	AP-2 complex subunit sigma-1	65046	Rn.37866
C162R026	0.00383191	0.393288	0.683179	-1.05083	-0.0715329	1.21737	0.283766	-1.04788	-0.0674755	1.27925	0.355299	1.09426	0.129949	1.01748	0.0249958	1.09118	0.125892	1.29795	0.376237	1.18949	0.250346	UNKNOWN
C179R026	0.00230759	0.712256	4.65081e-08	1.39453	0.479775	1.33522	0.417075	2.0138	1.00992	-1.04442	-0.0626994	2.34932	1.23224	2.47228	1.30584	1.62687	0.702096	1.63921	0.712999	1.00759	0.010903	Galectin-9-like protein		Hs.656100
C180R026	0.00124377	0.256823	0.892333	-1.30228	-0.38104	-1.10913	-0.149434	-1.0064	-0.00920963	1.17414	0.231607	1.12201	0.166084	-1.09236	-0.127454	-1.15328	-0.205747	-1.20387	-0.267679	-1.04386	-0.0619321	UNKNOWN
C187R026	0.00102963	0.956657	0.845064	-1.2323	-0.301358	-1.27586	-0.351475	-1.00615	-0.00884983	-1.03535	-0.0501168	1.00211	0.00303854	1.03657	0.0518141	-1.22219	-0.28947	-1.22333	-0.290811	-1.00093	-0.00134128	Splicing factor, arginine/serine-rich 1	393565	Dr.77384
C206R026	0.000268001	0.455089	0.0784572	1.26365	0.337601	1.13019	0.176559	-1.24953	-0.321386	-1.11809	-0.161042	-1.05642	-0.0791875	-1.09542	-0.131482	1.49464	0.579799	1.28919	0.366463	-1.15937	-0.213336	Protein BCCIP homolog	444344	Xl.78605
C262R026	0.00336735	0.658695	0.178993	-1.27049	-0.34538	-1.15172	-0.203788	1.1751	0.232787	1.10312	0.141592	1.14632	0.197014	-1.00667	-0.0095892	-1.30238	-0.381153	-1.36241	-0.446165	-1.04609	-0.0650114	Short coiled-coil protein
C056R027	0.00084238	0.113101	0.352187	1.59182	0.670681	1.33142	0.412968	-1.09274	-0.12795	-1.19558	-0.257713	-1.40318	-0.488704	1.18146	0.240576	1.23965	0.309927	1.71891	0.781495	1.38662	0.471568	Uncharacterized protein C16orf14 homolog	618020	Bt.3865
C101R027	0.00345057	0.789908	0.0768652	-1.33701	-0.419012	-1.35738	-0.440829	1.21369	0.279401	-1.01524	-0.0218164	1.25684	0.329797	1.06972	0.0972297	-1.29111	-0.368617	-1.54007	-0.623	-1.19283	-0.254384	Syntaxin-binding protein 6	534718	Bt.88441
C130R027	0.00752094	0.0375923	0.806998	1.14279	0.192563	-1.15412	-0.206799	1.31642	0.396625	-1.31892	-0.399362	-1.11221	-0.153429	-1.11899	-0.162202	-1.2812	-0.357492	-1.70011	-0.765626	-1.32697	-0.408135	Ras-related protein Rab-6A	5870	Hs.12152; Hs.503222; Hs.535586; Hs.591552
C166R027	3.88117e-06	0.948804	0.971195	-1.32981	-0.411222	-1.23189	-0.300877	-1.00531	-0.00764072	1.07949	0.110345	1.02009	0.0287011	-1.00982	-0.0140928	-1.29673	-0.37488	-1.23742	-0.307329	1.04794	0.0675507	RNA-binding protein 4B
C182R027	0.00332937	0.23764	0.0381769	1.30176	0.380462	1.07161	0.0997858	1.07105	0.0990239	-1.21476	-0.280676	1.03699	0.0523984	1.40387	0.489404	1.26036	0.333836	1.40461	0.490166	1.11445	0.15633	Heat shock protein HSP 90-alpha	397028	Ssc.12191
C215R027	0.00377539	0.554035	0.586505	1.22839	0.296772	1.20888	0.273668	-1.02384	-0.033994	-1.01614	-0.0231038	-1.11172	-0.152797	1.04108	0.0580742	1.13129	0.177969	1.28854	0.365737	1.139	0.187768	Eukaryotic translation initiation factor 4E-binding protein 2	13688	Mm.259516
C262R027	0.000860662	0.121389	0.953242	-1.27578	-0.351376	-1.17882	-0.237342	-1.0883	-0.122075	1.08225	0.114034	-1.17454	-0.232101	1.26234	0.336096	-1.37688	-0.461401	1.1654	0.220829	1.60462	0.68223	UNKNOWN
C010R028	0.00025261	0.314706	0.328121	-1.15602	-0.209163	-1.7896	-0.839634	1.04293	0.0606403	-1.54807	-0.630471	-1.33204	-0.413637	-1.07486	-0.104143	-1.60597	-0.68344	-2.00613	-1.00442	-1.24918	-0.320977	DNA topoisomerase 2-alpha	360243	Rn.90996
C026R028	4.34093e-08	0.111688	0.81655	2.6315	1.39588	1.486	0.571435	-1.04259	-0.0601689	-1.77086	-0.82445	-1.3604	-0.444034	1.31807	0.398427	2.01673	1.01202	2.04207	1.03003	1.01256	0.0180105	CCAAT/enhancer-binding protein delta	12609	Mm.347407
C031R028	0.00386226	0.468208	0.403325	1.01089	0.0156194	1.49478	0.579932	-1.00719	-0.0103386	1.47868	0.564312	1.22235	0.289653	1.02572	0.0366422	1.24454	0.315611	1.54426	0.626912	1.24083	0.311302	Zinc finger protein 135	7694	Hs.85863
C039R028	0.00305771	0.865871	0.034774	1.49862	0.583632	1.33636	0.418314	-1.15913	-0.213045	-1.12141	-0.165318	-1.27616	-0.351811	-1.27115	-0.346134	1.36119	0.444866	1.2186	0.285225	-1.11701	-0.15964	UNKNOWN
C046R028	0.0046914	0.976937	0.000440092	1.49323	0.578434	1.32136	0.402028	-1.49752	-0.582575	-1.13007	-0.176406	-1.56599	-0.647074	-1.50985	-0.594409	1.42794	0.513935	1.31057	0.390194	-1.08956	-0.123741	Retinol-binding protein I, cellular	537379	Bt.30846
C108R028	0.0041377	0.824201	0.328197	1.2728	0.348001	1.15735	0.21082	-1.13128	-0.177954	-1.09975	-0.137182	-1.09287	-0.128127	-1.00397	-0.00571957	1.31752	0.397828	1.3041	0.383054	-1.01029	-0.0147742	UNKNOWN
C122R028	0.00857944	0.88613	0.123118	-1.28181	-0.358182	1.02614	0.0372271	1.10547	0.144661	1.31532	0.395409	1.17284	0.230004	1.08545	0.118296	-1.20818	-0.272838	1.00756	0.0108622	1.21731	0.283701	Nucleolar transcription factor 1	7343	Hs.89781
C132R028	0.00481635	0.807575	0.0146774	-1.22725	-0.295424	1.06938	0.0967753	1.15409	0.206754	1.31239	0.392199	1.2215	0.28865	1.11523	0.157341	-1.15952	-0.213527	1.03337	0.0473627	1.19822	0.26089	UNKNOWN
C134R028	0.00376332	0.682437	0.204193	-1.24683	-0.318261	-1.22519	-0.293009	1.01456	0.0208517	1.01766	0.0252523	1.05865	0.0822304	1.15113	0.203045	-1.19489	-0.256883	-1.07984	-0.110816	1.10655	0.146067	Dihydropyrimidinase-related protein 2	1808	Hs.173381
C142R028	0.00120074	0.750998	0.0245351	1.23747	0.30739	1.44078	0.526852	-1.27451	-0.349944	1.1643	0.219463	-1.28897	-0.366223	-1.09917	-0.136411	1.22358	0.291111	1.67062	0.740385	1.36535	0.449274	UNKNOWN
C143R028	0.00502194	0.233072	0.188787	1.49201	0.577259	1.10423	0.14304	-1.17476	-0.232364	-1.35118	-0.434219	-1.36933	-0.45347	1.11201	0.153164	1.28001	0.356153	1.4425	0.528567	1.12694	0.172415	BCL2/adenovirus E1B 19 kDa protein-interacting protein 3	12176	Mm.378890
C149R028	0.0051082	0.0147622	0.0238204	-1.13442	-0.18195	1.03989	0.0564292	-1.10998	-0.150539	1.17967	0.238379	1.1909	0.252056	1.47319	0.558947	1.16525	0.220645	1.70045	0.765915	1.45929	0.54527	Proline-rich protein BCA3	56672	Hs.131180
C150R028	0.00030885	0.90619	0.570379	1.45963	0.545606	1.59104	0.669967	1.00665	0.00955746	1.09002	0.12436	1.04375	0.0617702	1.13521	0.182961	1.51343	0.597819	1.79424	0.84337	1.18555	0.245551	Friend leukemia integration 1 transcription factor	529124	Bt.67771
C244R028	0.00112349	0.27752	0.000101203	1.32358	0.404445	1.03351	0.0475512	-1.26992	-0.344741	-1.28067	-0.356893	-1.42309	-0.509026	-1.14122	-0.190571	1.18112	0.240159	1.15007	0.201721	-1.027	-0.0384385	60S ribosomal protein L10	286790; 782629	Bt.46990
C009R029	7.17596e-05	0.191732	8.59125e-05	1.47549	0.56119	1.46445	0.55036	-1.14325	-0.193142	-1.00754	-0.0108299	-1.40802	-0.493672	-1.39024	-0.47533	1.19803	0.26066	1.20428	0.268171	1.00522	0.00751168	Pleiotrophic factor-beta-1 precursor	444715	Xl.900
C056R029	0.00433843	0.272553	0.430394	1.19491	0.256905	1.12163	0.165595	1.01703	0.0243627	-1.06534	-0.0913095	-1.09971	-0.137118	-1.00528	-0.00759869	1.06838	0.0954245	1.09705	0.133634	1.02684	0.0382095	Ras-related protein Rab-1A	5861	Hs.310645
C085R029	0.00806663	0.523447	0.557248	-1.59884	-0.67703	-1.54889	-0.631231	-1.05524	-0.0775717	1.03225	0.0457994	-1.03997	-0.0565386	1.39798	0.483346	-1.5757	-0.655997	-1.04994	-0.0703131	1.50075	0.585684	Plasticin
C101R029	0.000181706	0.501516	1.67664e-05	1.25948	0.332826	1.23491	0.304411	-1.17217	-0.22918	-1.01989	-0.0284149	-1.29144	-0.368983	-1.23593	-0.305599	1.14316	0.193023	1.1712	0.227992	1.02453	0.0349691	Eukaryotic translation initiation factor 3 subunit K	515326	Bt.53466
C153R029	0.00577771	0.375259	0.0200138	1.15077	0.202595	1.00717	0.0103053	1.04917	0.0692504	-1.14258	-0.19229	1.06265	0.0876619	1.21905	0.285755	1.16555	0.221007	1.17024	0.22681	1.00403	0.00580345	UNKNOWN
C199R029	0.00152078	0.452246	0.000422008	1.09863	0.135708	1.41832	0.504182	1.39222	0.477388	1.29099	0.368474	1.19527	0.25734	1.50044	0.585384	-1.0602	-0.0843397	1.52857	0.612179	1.62059	0.696518	Afadin- and alpha-actinin-binding protein	117178	Hs.22587
C027R030	0.00304702	0.0230239	0.603675	-1.03334	-0.0473208	-1.53406	-0.617353	1.0991	0.136322	-1.48456	-0.570032	-1.4779	-0.563547	1.16301	0.217863	-1.67852	-0.74719	-1.44976	-0.535812	1.15779	0.211378	CPEB-associated factor Maskin		Xl.25749
C125R030	0.00123343	0.864589	0.946096	1.95141	0.964514	1.467	0.552869	1.00927	0.0133112	-1.3302	-0.411645	-1.12033	-0.163927	1.07694	0.106933	1.72581	0.787275	1.56536	0.646491	-1.1025	-0.140784	UNKNOWN
C158R030	0.00953433	0.197587	0.00538739	-1.49103	-0.576308	-1.29344	-0.371218	1.0639	0.089369	1.15276	0.205089	1.40612	0.491716	1.35242	0.435546	-1.12815	-0.17396	-1.01751	-0.0250418	1.10874	0.148918	UNKNOWN
C160R030	0.000182275	0.454757	0.529736	1.87151	0.904206	1.70872	0.772918	1.0959	0.13212	-1.09527	-0.131287	-1.12994	-0.176251	1.30367	0.382574	1.51135	0.595835	2.03267	1.02337	1.34494	0.427538	Lysozyme g
C162R030	0.00316979	0.132089	0.0310273	1.2507	0.322732	1.06225	0.0871289	-1.17277	-0.22992	-1.1774	-0.235604	-1.26661	-0.340972	1.04748	0.0669197	1.15804	0.21168	1.30493	0.383968	1.12684	0.172288	Protein MGR2 homolog	140823	Hs.472564
C180R030	0.00337754	0.994919	0.237833	1.10256	0.140857	1.7383	0.797681	-1.1377	-0.186125	1.57661	0.656823	-1.12919	-0.175284	-1.16308	-0.217954	1.11088	0.151698	1.70037	0.765852	1.53066	0.614153	Tubulin alpha chain
C188R030	0.000308917	0.0199548	0.409006	1.10612	0.145506	1.04874	0.0686592	-1.17436	-0.231869	-1.05471	-0.076847	-1.07707	-0.107111	1.14985	0.20145	1.20603	0.270264	1.41615	0.501978	1.17423	0.231714	Eukaryotic translation initiation factor 3 subunit K	515326	Bt.53466
C213R030	0.00495141	0.328709	0.000264632	1.35824	0.441736	1.12165	0.165629	-1.15453	-0.20731	-1.21092	-0.276107	-1.38283	-0.467622	-1.364	-0.447844	1.134	0.181424	-1.05329	-0.0749058	-1.19444	-0.25633	Eukaryotic translation initiation factor 3 subunit G	8666	Hs.529059
C230R030	3.16527e-08	0.976469	0.00617651	-1.55183	-0.633973	-1.60201	-0.679886	-1.18035	-0.239218	-1.03234	-0.0459126	-1.18272	-0.242111	-1.2199	-0.28676	-1.55495	-0.636866	-1.65569	-0.727429	-1.06479	-0.0905625	Tripartite motif-containing protein 17	618634	Bt.91974
C034R031	0.000448959	0.196807	0.136539	1.5207	0.604733	1.4454	0.531466	-1.14471	-0.194981	-1.0521	-0.0732674	-1.4162	-0.502021	1.0741	0.103135	1.22918	0.297693	1.77717	0.829581	1.44582	0.531888	Mucosa-associated lymphoid tissue lymphoma translocation protein 1	10892	Hs.601217
C077R031	0.00853308	0.563729	0.0697754	1.32468	0.405645	1.17316	0.230399	-1.03476	-0.0492931	-1.12916	-0.175247	-1.14728	-0.198214	-1.24333	-0.314214	1.19476	0.256725	-1.02422	-0.0345223	-1.2237	-0.291247	Sialidase-3	281349	Bt.477
C082R031	0.00241206	0.317607	0.0035127	1.34091	0.423209	1.28492	0.361682	-1.08402	-0.116389	-1.04357	-0.0615274	-1.288	-0.365128	-1.22508	-0.292873	1.12855	0.17447	1.13697	0.185198	1.00746	0.0107284	Methylmalonate-semialdehyde dehydrogenase [acylating], mitochondrial precursor	104776	Mm.247510
C085R031	0.000377525	0.329505	0.526964	2.16187	1.11228	2.00601	1.00433	1.38056	0.465249	-1.0777	-0.107957	-1.07187	-0.100125	1.00168	0.00241852	1.46095	0.54691	1.45548	0.541496	-1.00376	-0.00541374	Lysozyme g
C108R031	0.000391034	0.564347	0.000842581	1.27077	0.345705	1.03248	0.0461124	-1.17165	-0.228546	-1.2308	-0.299592	-1.25991	-0.333319	-1.12155	-0.165488	1.18176	0.240932	1.07861	0.109171	-1.09563	-0.131761	Ribosome maturation protein SBDS	448365	Str.16646
C116R031	0.0046537	0.219404	0.452039	-1.62876	-0.703776	-1.22371	-0.291258	-1.02086	-0.0297778	1.33101	0.412518	1.32553	0.406565	-1.0486	-0.0684696	-1.20366	-0.267434	-1.25697	-0.32995	-1.04429	-0.0625161	UNKNOWN
C120R031	0.000365281	0.0751673	0.00608564	-1.2906	-0.368043	-1.12328	-0.167717	-1.06193	-0.0866871	1.14896	0.200326	-1.07526	-0.104691	-1.55759	-0.63932	-1.30681	-0.386048	-1.64758	-0.72035	-1.26077	-0.334303	High mobility group protein B2	3148	Hs.434953
C125R031	0.00320457	0.139157	0.416575	1.09248	0.127606	1.34469	0.42727	-1.15234	-0.204568	1.23086	0.299665	-1.07722	-0.107319	1.70888	0.773052	1.16866	0.224854	2.64798	1.40489	2.26582	1.18004	Coronin-1A	155151	Rn.6990
C138R031	1.30129e-05	0.078924	0.911548	1.36854	0.452634	1.45499	0.541005	-1.36736	-0.451396	1.06317	0.0883719	-1.00694	-0.00997284	1.33095	0.412455	1.85839	0.894057	2.64791	1.40486	1.42484	0.5108	Butyrate response factor 2	678	Hs.503093; Hs.645068
C152R031	0.000185646	0.0173326	0.727246	1.29803	0.376326	1.10978	0.150271	-1.02422	-0.0345286	-1.16963	-0.226055	-1.16121	-0.215634	1.24869	0.320416	1.1449	0.195221	1.41934	0.505215	1.2397	0.309995	Thioredoxin-dependent peroxide reductase, mitochondrial precursor
C217R031	0.00750905	0.0535287	0.035427	1.038	0.0538002	1.05683	0.0797401	-1.0403	-0.0569967	1.01814	0.0259399	1.2408	0.311269	1.17714	0.235282	1.33985	0.422066	1.29416	0.372019	-1.0353	-0.0500473	UNKNOWN
C263R031	0.00102648	0.734113	0.627925	1.13964	0.188583	1.98762	0.991042	-1.00621	-0.00893491	1.74407	0.802459	1.03583	0.0507909	-1.20602	-0.270257	1.18781	0.248309	1.65832	0.72972	1.39611	0.481411	UNKNOWN
C002R032	0.000177624	0.906306	0.125163	-1.52462	-0.608445	-1.29686	-0.37502	1.11106	0.151941	1.17562	0.233426	1.18686	0.247149	1.10957	0.150001	-1.42725	-0.513238	-1.2986	-0.37696	1.09907	0.136278	UNKNOWN
C008R032	0.00177524	0.931645	0.0003613	1.49016	0.575467	1.41195	0.497685	-1.60878	-0.685966	-1.05539	-0.0777815	-1.59343	-0.672135	-1.45006	-0.536114	1.50451	0.589298	1.56649	0.647537	1.04119	0.0582395	Annexin A5	428767	Gga.1168
C096R032	4.5646e-05	0.0311365	3.0971e-07	1.40856	0.49422	1.26786	0.34239	-1.14832	-0.199531	-1.11098	-0.151829	-1.44427	-0.530337	-1.39715	-0.482485	1.11993	0.163414	1.04206	0.0594358	-1.07473	-0.103978	60S ribosomal protein L12	6136	Hs.408054
C113R032	0.00185938	0.0212879	0.305164	-1.14393	-0.193995	-1.23677	-0.306578	1.14565	0.196169	-1.08116	-0.112583	1.23327	0.302493	-2.10201	-1.07177	-1.06265	-0.0876713	-2.97835	-1.57451	-2.80275	-1.48684	UNKNOWN
C122R032	0.00774463	0.295745	0.702766	-1.06011	-0.08421	-1.12437	-0.16912	1.12768	0.173358	-1.06062	-0.0849098	-1.01833	-0.0262106	-1.04562	-0.0643538	-1.21738	-0.283778	-1.32577	-0.406831	-1.08904	-0.123053	UNKNOWN
C134R032	0.00552137	0.351785	0.0665214	1.32963	0.411023	1.19123	0.252448	-1.27882	-0.354817	-1.11618	-0.158575	-1.33054	-0.412014	1.04044	0.0571968	1.27794	0.353826	1.58498	0.664461	1.24025	0.310636	Caldesmon	800	Hs.490203
C194R032	0.00104433	0.209125	0.0109187	-1.50171	-0.586607	-1.4846	-0.570076	1.03624	0.0513518	1.01152	0.0165308	1.22015	0.287061	1.49146	0.576723	-1.27535	-0.350897	-1.03147	-0.0447045	1.23644	0.306193	Pre-mRNA-splicing factor ISY1 homolog	57905	Mm.241546; Mm.461050
C233R032	0.00612517	0.447371	0.00939721	1.27566	0.351244	1.11831	0.161327	-1.0731	-0.101787	-1.1407	-0.189917	-1.22309	-0.290529	-1.1647	-0.219953	1.11923	0.162502	1.03037	0.0431608	-1.08624	-0.119341	Integral membrane protein 2B	395969	Gga.9467
C249R032	0.00276861	0.309034	0.0016448	1.16096	0.215317	-1.11307	-0.154547	-1.16201	-0.216628	-1.29223	-0.369864	-1.21548	-0.281522	-1.59167	-0.670542	1.1099	0.150424	-1.52463	-0.608461	-1.69218	-0.758885	Cytochrome c oxidase subunit 5A, mitochondrial precursor	444878	Bt.55686
C054R033	0.00755834	0.823281	0.737449	1.33878	0.420924	1.44113	0.5272	-1.03266	-0.0463641	1.07645	0.106276	-1.00536	-0.00771591	1.16739	0.223281	1.37513	0.459572	1.7373	0.796846	1.26337	0.337273	17-beta-hydroxysteroid dehydrogenase 14	282652	Bt.88264
C056R033	0.00206121	0.408871	0.888063	-1.22231	-0.28961	-1.11847	-0.16152	-1.05238	-0.0736553	1.09285	0.128089	-1.05327	-0.0748786	1.13395	0.181355	-1.22335	-0.290833	1.06695	0.0934902	1.30525	0.384323	Microtubule-associated protein 6 homolog
C091R033	0.00414927	0.0879176	0.262733	1.32184	0.402552	1.22669	0.294774	1.1019	0.139995	-1.07757	-0.107778	-1.07703	-0.107062	-1.22932	-0.297865	1.1138	0.155495	-1.10427	-0.143087	-1.22993	-0.298582	MAK16-like protein RBM13	192312	Dr.76904
C093R033	0.00159868	0.0384896	0.32376	-1.05696	-0.0799221	-1.16458	-0.219814	1.14484	0.195149	-1.10182	-0.139891	-1.24524	-0.316423	-1.12211	-0.166216	-1.50681	-0.591495	-1.49607	-0.581179	1.00718	0.0103157	UNKNOWN
C098R033	0.000312337	0.187907	0.000211507	1.42418	0.510132	1.18839	0.249005	-1.11612	-0.15849	-1.19841	-0.261127	-1.31581	-0.395953	-1.47303	-0.558785	1.20804	0.272669	-1.11056	-0.15129	-1.3416	-0.423959	DnaJ homolog subfamily C member 12	619393	Rn.211982; Rn.9583
C123R033	0.00132328	0.387773	0.00220058	-1.12833	-0.174184	-1.13371	-0.181054	-1.07804	-0.10841	-1.00477	-0.00686989	-1.15962	-0.213649	-1.27415	-0.349539	-1.21371	-0.279423	-1.33995	-0.422183	-1.10402	-0.14276	26S proteasome non-ATPase regulatory subunit 7	5713	Hs.696154
C185R033	0.00222116	0.210803	0.384609	1.0841	0.116502	1.06996	0.0975604	-1.12877	-0.174747	-1.01322	-0.0189418	1.01964	0.0280604	-1.00418	-0.00601892	1.24773	0.31931	1.20271	0.266288	-1.03744	-0.0530211	UNKNOWN
C222R033	0.00564955	0.814162	0.121717	1.36803	0.4521	1.51396	0.598326	-1.26774	-0.342261	1.10667	0.146226	-1.09959	-0.136967	-1.27278	-0.347987	1.57723	0.657394	1.50796	0.5926	-1.04594	-0.0647941	Secretogranin-2 precursor	281477	Bt.5427
C246R033	0.00168022	0.122226	0.000241799	-1.60789	-0.685167	-1.32999	-0.41141	1.1596	0.213631	1.20895	0.273757	1.45558	0.541594	1.95918	0.970247	-1.28094	-0.357204	1.27033	0.345205	1.62722	0.702409	Kinesin-like protein KIF1B	23095	Hs.97858
C248R033	0.00618188	0.479092	0.136288	1.20434	0.268237	1.0326	0.0462849	-1.22971	-0.298323	-1.16631	-0.221952	-1.11335	-0.154912	1.00484	0.00695925	1.3302	0.411648	1.27595	0.351567	-1.04252	-0.0600811	Protein BCCIP homolog	444344	Xl.78605
C004R034	0.00165421	0.613917	0.446922	-1.1538	-0.206392	-1.19054	-0.251621	1.03524	0.0499638	-1.03185	-0.0452296	-1.02201	-0.0314125	1.09361	0.129104	-1.22075	-0.287768	-1.12699	-0.172481	1.08319	0.115287	Proteasome subunit alpha type-6	29673	Rn.107278
C104R034	0.00261442	0.392368	0.000677494	1.76668	0.821042	1.65082	0.723183	-1.31299	-0.392854	-1.07018	-0.0978582	-1.81062	-0.856483	-1.56334	-0.644627	1.28113	0.357413	1.38646	0.47141	1.08222	0.113997	Uncharacterized protein C17orf37 homolog	103742	Mm.259614
C114R034	0.000161958	0.212471	0.00541204	1.19736	0.259859	1.11277	0.154158	-1.27096	-0.345921	-1.07602	-0.1057	-1.04667	-0.0658015	-1.25104	-0.323129	1.45395	0.539978	1.13049	0.176951	-1.28612	-0.363028	Ribosome maturation protein SBDS	448365	Str.16646
C127R034	0.000283282	0.193299	0.000388215	1.82898	0.871041	1.36636	0.450333	-1.34749	-0.430278	-1.33858	-0.420708	-1.85223	-0.889265	-1.28019	-0.356357	1.33058	0.412054	1.43819	0.524254	1.08088	0.112201	UNKNOWN
C137R034	0.00456377	0.433902	0.00568281	-1.17161	-0.228492	1.09164	0.126502	1.14577	0.196316	1.27898	0.354995	1.17385	0.231244	1.48094	0.566511	-1.14359	-0.193564	1.41098	0.496698	1.61358	0.690262	UNKNOWN
C208R034	2.74862e-05	0.0974232	0.000760299	1.24212	0.312804	1.49011	0.575423	1.09749	0.134209	1.19966	0.26262	1.4146	0.500394	1.9217	0.942383	1.60102	0.678988	2.60918	1.3836	1.6297	0.704609	Beta-2-microglobulin precursor
C265R034	0.00156102	0.825264	0.01213	1.66689	0.737163	1.64869	0.721319	-1.24711	-0.318593	-1.01104	-0.0158438	-1.40106	-0.486519	-1.47582	-0.561513	1.48374	0.569237	1.3932	0.478398	-1.06499	-0.0908386	Peroxiredoxin
C007R035	0.00107193	0.8561	0.743001	-1.23828	-0.308335	-1.16707	-0.222888	1.05119	0.0720267	1.06102	0.085447	1.03593	0.0509229	-1.03097	-0.0439963	-1.25652	-0.329439	-1.2648	-0.338911	-1.00659	-0.00947224	Interleukin enhancer-binding factor 2 homolog	406517	Dr.76824
C051R035	0.00911122	0.914743	0.104675	-1.20052	-0.26366	-1.43672	-0.522776	1.14988	0.201489	-1.19675	-0.259116	1.10116	0.139018	1.20602	0.270252	-1.25365	-0.32613	-1.36985	-0.454013	-1.09269	-0.127883	Sterile alpha motif domain-containing protein 14	201191	Hs.567769
C109R035	2.44271e-05	0.711022	0.464326	1.41415	0.499932	1.5483	0.630688	-1.16089	-0.215226	1.09487	0.130757	-1.0727	-0.101246	1.03239	0.0459938	1.5304	0.613911	1.85563	0.891908	1.21251	0.277997	Cocaine- and amphetamine-regulated transcript protein precursor	493726	Bt.20015
C116R035	0.00764508	0.588585	0.578689	1.3546	0.437863	1.04893	0.0689126	-1.15328	-0.205737	-1.29141	-0.368951	-1.12353	-0.168033	1.10868	0.148839	1.39047	0.475568	1.34117	0.423489	-1.03676	-0.0520791	BCL2/adenovirus E1B 19 kDa protein-interacting protein 3	12176	Mm.378890
C165R035	0.00489583	0.108179	0.89957	1.16013	0.214283	1.0925	0.127639	-1.2981	-0.376401	-1.0619	-0.086644	1.08098	0.112341	1.24586	0.317148	1.62792	0.703025	1.76686	0.821187	1.08535	0.118162	Fibroleukin precursor	10875	Hs.520989
C167R035	0.00597921	0.349659	0.755988	-1.10214	-0.140313	-1.24259	-0.313349	1.02242	0.0319883	-1.12743	-0.173036	-1.12991	-0.176208	1.04876	0.0686892	-1.27324	-0.348509	-1.21138	-0.276648	1.05107	0.0718615	ATP synthase lipid-binding protein, mitochondrial precursor	228033	Mm.2966
C218R035	0.00250819	0.650379	0.731633	-1.26424	-0.338272	-1.34143	-0.423774	-1.04305	-0.060811	-1.06106	-0.0855028	1.05972	0.0836801	-1.08949	-0.123658	-1.14376	-0.19378	-1.40116	-0.486621	-1.22505	-0.29284	Tetra-peptide repeat homeobox protein 1	284355	Hs.629812
C222R035	0.00636186	0.70701	0.0581951	1.84872	0.886526	1.58734	0.666614	-1.40713	-0.492752	-1.16466	-0.219912	-1.21433	-0.280165	-1.87501	-0.9069	2.14223	1.09911	1.19124	0.252465	-1.79832	-0.846647	Centromere protein J	467235
C043R036	0.00484996	0.352956	0.19373	1.14426	0.194412	1.25857	0.331786	1.10816	0.148165	1.0999	0.137374	-1.0288	-0.0409658	1.14052	0.189691	1.00367	0.00528118	1.29532	0.373312	1.29059	0.368031	Splicing factor 3B subunit 1	399336	Xl.2599
C046R036	0.00926091	0.455216	0.0902307	-1.24691	-0.318359	-1.0713	-0.0993651	-1.02603	-0.0370736	1.16392	0.218994	-1.10364	-0.142268	-1.33773	-0.419788	-1.34123	-0.423554	-1.39676	-0.48208	-1.0414	-0.058526	UNKNOWN
C050R036	0.00275278	0.920635	0.00786733	-1.23611	-0.305805	-1.12248	-0.166686	1.21598	0.282115	1.10123	0.139119	1.15785	0.211446	1.20437	0.268278	-1.29817	-0.376474	-1.1333	-0.180524	1.14548	0.19595	Mitochondrial-processing peptidase subunit beta, mitochondrial precursor
C062R036	0.000109489	0.553161	0.0955451	1.48244	0.567971	1.31327	0.393162	-1.15184	-0.203943	-1.12881	-0.174809	-1.25449	-0.327096	-1.01458	-0.0208765	1.36114	0.444817	1.49095	0.576228	1.09536	0.131411	Receptor expression-enhancing protein 5	7905	Hs.429608
C083R036	0.000527245	0.340434	0.814515	-1.32009	-0.400633	-1.12876	-0.174739	1.20188	0.265295	1.1695	0.225894	-1.08852	-0.122367	-1.03417	-0.0484758	-1.72703	-0.788295	-1.40299	-0.488509	1.23096	0.299785	Ornithine decarboxylase 1		Xl.4223
C199R036	0.00798565	0.875845	0.0733641	1.2516	0.323777	-1.02781	-0.0395711	-1.0867	-0.11996	-1.28641	-0.363348	-1.16161	-0.216122	-1.15128	-0.203245	1.1709	0.227615	-1.08889	-0.122857	-1.27498	-0.350471	Protein MGR2 homolog	140823	Hs.472564
C213R036	0.00405695	0.764027	0.473986	1.16775	0.223736	-1.26755	-0.342043	1.01346	0.0192954	-1.48019	-0.565779	-1.10441	-0.143275	-1.09237	-0.127465	1.04331	0.0611653	-1.40328	-0.488803	-1.46405	-0.549969	Protein CASP	1523	Hs.654389
C217R036	0.00696453	0.201434	0.00251754	1.2497	0.321576	-1.09093	-0.125556	-1.17605	-0.233947	-1.36333	-0.447133	-1.34627	-0.428969	-1.06252	-0.0874882	1.09168	0.126555	1.01459	0.0209029	-1.07598	-0.105652	Sperm-associated antigen 7	100048812; 216873	Mm.432524
C257R036	0.000318393	0.839646	0.99689	-1.3427	-0.425138	-1.16093	-0.215286	1.05469	0.0768217	1.15657	0.209851	-1.0233	-0.0332306	-1.03155	-0.044807	-1.44913	-0.53519	-1.26305	-0.336915	1.14733	0.198275	UNKNOWN
C032R037	0.0021846	0.7807	0.648111	1.18491	0.244777	1.89687	0.923624	-1.01083	-0.0155423	1.60086	0.678847	-1.02332	-0.0332561	1.27186	0.346935	1.17045	0.227063	2.43868	1.2861	2.08354	1.05904	Kelch-like protein 6	89857	Hs.659147; Hs.677418
C090R037	0.0028494	0.251504	0.600069	1.43941	0.525482	1.30061	0.379192	1.15419	0.206885	-1.10672	-0.14629	-1.0925	-0.127632	1.0547	0.0768265	1.14153	0.190965	1.18849	0.249133	1.04114	0.0581683	Transposable element Tcb1 transposase
C139R037	0.00647693	0.258464	0.0333492	-1.39991	-0.485336	-2.18831	-1.12982	-1.53522	-0.618441	-1.56318	-0.644482	-1.77669	-0.829191	1.05506	0.077329	-1.6201	-0.696086	-1.35102	-0.434049	1.19917	0.262037	cAMP-regulated phosphoprotein 19	282658	Bt.4823
C207R037	0.000154547	0.0615307	0.0959254	1.29574	0.373781	1.09409	0.129727	1.03573	0.0506466	-1.18432	-0.244054	-1.051	-0.0717675	1.28965	0.366978	1.19033	0.251367	1.36231	0.446058	1.14448	0.194691	116831 pfam08246, Inhibitor_I29, Cathepsin propeptide inhibitor domain (I29). This domain is found at the N-terminus of some C1 peptidases such as Cathepsin L where it acts as a propeptide. There are also a number of proteins that are composed solely ...
C220R037	0.00128375	0.492304	0.0185794	1.21096	0.276149	1.08108	0.112475	1.05747	0.0806203	-1.12014	-0.163674	1.15779	0.211379	1.26098	0.334547	1.32584	0.406908	1.28913	0.366402	-1.02847	-0.0405063	UNKNOWN
C241R037	0.00277306	0.465598	0.108306	-1.32195	-0.402663	-1.10174	-0.139781	1.10944	0.149828	1.19987	0.262882	1.21804	0.284566	1.00221	0.0031847	-1.20407	-0.267925	-1.21961	-0.286424	-1.01291	-0.0184998	UNKNOWN
C257R037	0.00856546	0.801074	0.0489195	1.02824	0.0401791	1.2138	0.279535	1.11299	0.154435	1.18047	0.239356	1.08709	0.120475	1.04188	0.0591833	1.00432	0.00621877	1.13625	0.184284	1.13137	0.178065	Transposable element Tcb1 transposase
C261R037	0.00633481	0.593919	0.0011852	-1.21932	-0.286074	-1.04164	-0.0588528	1.46364	0.549557	1.17058	0.227221	1.235	0.304506	1.3398	0.422019	-1.44506	-0.531125	-1.13791	-0.186391	1.26992	0.344734	Ubiquitin thioesterase OTUB1	100046081; 107260	Mm.203921
C262R037	0.00319046	0.350338	0.000154811	1.50482	0.589594	1.47063	0.556435	-1.22771	-0.295969	-1.02325	-0.0331589	-1.50008	-0.585037	-1.62518	-0.700601	1.23159	0.300525	1.11096	0.151802	-1.10859	-0.148723	Zinc finger protein 706	768824	Gga.1074
C038R038	0.00737594	0.831179	0.010306	-1.31293	-0.392786	-1.21236	-0.277819	-1.20197	-0.265405	1.08295	0.114967	-1.27585	-0.351462	-1.39139	-0.476527	-1.39362	-0.478842	-1.40341	-0.48894	-1.00702	-0.0100981	Platelet-derived growth factor receptor-like protein precursor	515017	Bt.47512
C046R038	0.00530423	0.0762024	2.78252e-09	1.13482	0.182465	1.42062	0.506524	3.31252	1.72793	1.25185	0.324059	6.72743	2.75006	12.3149	3.62233	2.30472	1.20459	5.28141	2.40092	2.29156	1.19633	Interferon-induced protein 44	456971
C057R038	0.00598174	0.72609	0.302209	-1.28881	-0.366035	-1.06895	-0.0961927	-1.09429	-0.129997	1.20568	0.269842	-1.00231	-0.00332493	-1.10182	-0.139894	-1.18047	-0.239363	-1.07631	-0.10609	1.09678	0.133273	Eukaryotic translation initiation factor 4E type 2	9470	Hs.292026
C073R038	3.57555e-05	0.0125662	3.5719e-09	-1.01618	-0.0231621	1.1857	0.245734	1.22687	0.294986	1.20489	0.268897	1.56428	0.645499	1.76401	0.818862	1.25471	0.327351	1.70481	0.76961	1.35873	0.442259	HIRA-interacting protein 3	8479	Hs.592046
C075R038	0.000347619	0.0574386	0.682463	-1.72352	-0.785358	-2.63696	-1.39888	-1.13616	-0.184171	-1.52999	-0.61352	-1.3904	-0.475499	1.89538	0.922489	-2.10919	-1.07669	-1.22452	-0.292217	1.72246	0.784469	Histone H1
C145R038	0.000607231	0.622223	0.106817	1.29341	0.371183	1.29163	0.369188	-1.26608	-0.340371	-1.00138	-0.00199521	-1.11036	-0.151027	-1.06321	-0.0884319	1.47481	0.560527	1.53808	0.621127	1.0429	0.0606	Translation initiation factor eIF-2B subunit beta
C219R038	0.00633246	0.129197	0.475776	-1.13272	-0.179793	-1.1876	-0.248047	1.13014	0.176505	-1.04845	-0.0682546	1.0565	0.0792862	-1.45892	-0.544897	-1.21168	-0.277011	-1.95809	-0.969448	-1.61601	-0.692437	Single-stranded DNA-binding protein 2	23635	Hs.699214
C004R039	0.00100444	0.0380348	0.00481373	1.01911	0.0273033	-1.12389	-0.168497	1.02169	0.0309599	-1.14536	-0.195801	-1.202	-0.265434	-1.31551	-0.395625	-1.20505	-0.26909	-1.51056	-0.595082	-1.25353	-0.325992	Transposable element Tcb1 transposase
C010R039	0.00241774	0.416209	0.00427438	1.33531	0.417173	1.14951	0.201016	-1.56262	-0.643966	-1.16163	-0.216156	-1.37851	-0.46311	-1.11941	-0.162739	1.51365	0.598029	1.60463	0.682243	1.06011	0.0842141	mTERF domain-containing protein 1, mitochondrial precursor	51001	Hs.308613
C036R039	1.90084e-06	0.065704	0.0519784	-1.30393	-0.382872	-1.2921	-0.369717	1.01428	0.0204503	1.00916	0.0131548	-1.01021	-0.0146483	1.2867	0.363672	-1.33605	-0.417971	-1.01853	-0.0264955	1.31173	0.391475	EH domain-containing protein 1	13660	Mm.30169; Mm.457826
C065R039	0.00335414	0.19236	4.8761e-06	1.21582	0.281925	1.07214	0.100491	-1.58389	-0.663476	-1.13401	-0.181433	-1.52459	-0.608425	-1.17475	-0.232351	1.26311	0.336976	1.44555	0.531616	1.14444	0.19464	60S ribosomal protein L18a
C072R039	4.17433e-05	0.485246	0.05404	-1.21525	-0.281257	-1.469	-0.55483	1.06438	0.0900141	-1.2088	-0.273573	1.04151	0.0586778	1.21854	0.285158	-1.24194	-0.312593	-1.28315	-0.359686	-1.03318	-0.047093	UNKNOWN
C083R039	0.00505787	0.0935176	0.00868621	1.37996	0.464626	1.37725	0.461789	-1.03723	-0.05274	-1.00197	-0.00283694	-1.37949	-0.46413	-1.18476	-0.2446	1.03759	0.053236	1.20575	0.269929	1.16207	0.216693	Eukaryotic translation initiation factor 6	3692	Hs.654848
C085R039	0.00496414	0.806732	0.0170444	-1.30264	-0.381438	1.10203	0.140157	1.17444	0.231974	1.43554	0.521595	1.25263	0.324955	1.3776	0.46216	-1.22133	-0.288457	1.29266	0.370344	1.57877	0.658801	Casein kinase II subunit beta	30428	Dr.30945
C105R039	0.00319596	0.281145	2.48031e-05	1.45429	0.540317	1.17661	0.234633	-1.24173	-0.312353	-1.236	-0.305684	-1.54925	-0.631569	-1.52462	-0.608446	1.16562	0.221102	-1.04352	-0.06146	-1.21635	-0.282562	Dynein light chain roadblock-type 2	768062	Bt.18339
C109R039	0.00551635	0.703941	0.265358	-1.16572	-0.221221	-1.20805	-0.272678	-1.01406	-0.0201443	-1.03631	-0.0514569	-1.04715	-0.0664625	-1.16441	-0.219604	-1.20375	-0.267539	-1.38716	-0.472138	-1.15237	-0.204598	Up-regulated during skeletal muscle growth protein 5	84833	Hs.500921
C181R039	0.00171948	0.795255	0.0694993	1.37044	0.454636	1.03764	0.0533126	-1.27039	-0.345266	-1.32072	-0.401324	-1.18688	-0.247177	-1.08914	-0.123192	1.46685	0.552725	1.21032	0.275386	-1.21196	-0.277338	AN1-type zinc finger protein 2B	363253	Rn.32162
C215R039	0.00768481	0.603139	0.0697929	3.40571	1.76795	4.19838	2.06983	-2.01491	-1.01072	1.23275	0.30188	-1.33261	-0.414259	-4.16261	-2.05749	5.14943	2.36441	2.03223	1.02306	-2.53389	-1.34135	Protein phosphatase methylesterase 1	535390	Bt.51583
C227R039	0.00239657	0.435917	0.0581354	1.24331	0.314191	1.21795	0.284451	-1.36541	-0.44933	-1.02083	-0.02974	-1.17292	-0.2301	-1.0352	-0.0499145	1.44736	0.533422	1.60644	0.683867	1.10991	0.150445	UNKNOWN
C053R040	0.00249586	0.392562	3.89219e-05	1.31201	0.391777	1.06102	0.0854501	-1.54919	-0.631518	-1.23656	-0.306327	-1.53111	-0.614579	-1.20554	-0.26968	1.3275	0.408715	1.36347	0.447288	1.0271	0.0385726	Serine/threonine-protein kinase receptor R3 precursor	94	Hs.591026
C078R040	0.00360277	0.102265	0.0107809	1.03889	0.0550454	1.09304	0.12835	1.06938	0.0967729	1.05212	0.0733049	1.00625	0.00898252	1.23202	0.301032	-1.02296	-0.032745	1.25929	0.332609	1.2882	0.365354	Transposable element Tcb1 transposase
C137R040	1.16819e-05	0.536258	0.39522	1.65896	0.73028	1.20981	0.274779	1.0284	0.0404068	-1.37126	-0.4555	-1.02472	-0.0352313	-1.25028	-0.322249	1.57422	0.654642	-1.0628	-0.0878763	-1.67309	-0.742518	Tissue factor pathway inhibitor 2 precursor	360007	Bt.29514
C158R040	0.00396782	0.489064	0.0204197	1.15375	0.206332	1.06406	0.0895788	-1.23219	-0.30122	-1.08429	-0.116753	-1.1251	-0.170058	-1.05777	-0.0810232	1.26356	0.337495	1.23952	0.309776	-1.0194	-0.0277185	Uncharacterized protein C11orf73 homolog	446847	Xl.6804
C194R040	0.000471761	0.765065	0.15334	-1.31723	-0.397505	-1.52308	-0.606989	-1.05464	-0.0767553	-1.15627	-0.209484	-1.20197	-0.2654	-1.1961	-0.258342	-1.50123	-0.586149	-1.72737	-0.788575	-1.15063	-0.202426	Sterol-4-alpha-carboxylate 3-dehydrogenase, decarboxylating	50814	Hs.57698
C250R040	0.000883077	0.109518	0.0683061	1.38159	0.466327	1.45721	0.543207	1.27604	0.351675	1.05473	0.0768799	-1.02925	-0.0415978	1.14897	0.20034	1.05194	0.0730543	1.31209	0.391872	1.24731	0.318818	Secretogranin-2 precursor	281477	Bt.5427
C018R041	0.00766208	0.995607	0.810557	-1.12032	-0.163915	-1.13099	-0.177584	1.00965	0.0138595	-1.00952	-0.0136695	1.00451	0.00648689	1.01299	0.0186175	-1.12606	-0.171288	-1.12726	-0.172826	-1.00107	-0.00153889	Aspartate aminotransferase, mitochondrial precursor	14719	Mm.230169
C036R041	0.000567075	0.572092	0.000325222	1.50506	0.589818	1.21439	0.280232	-1.24031	-0.310699	-1.23935	-0.309586	-1.40118	-0.486646	-1.52505	-0.608858	1.33226	0.413871	-1.0125	-0.017927	-1.34891	-0.431798	Cathepsin D precursor
C044R041	0.000583601	0.0988492	0.0865191	1.44881	0.534866	1.26084	0.334387	1.04775	0.0672924	-1.14908	-0.200479	-1.21995	-0.286827	-1.15674	-0.210065	1.13347	0.180746	1.04032	0.0570297	-1.08954	-0.123717	C-factor
C048R041	0.00105316	0.441549	0.918366	1.38652	0.471472	2.56026	1.35629	1.26139	0.335018	1.84653	0.884819	-1.15721	-0.210645	-1.04132	-0.0584192	-1.05277	-0.0741901	1.94916	0.962854	2.05202	1.03704	UNKNOWN
C068R041	2.89187e-05	0.314425	0.0205734	-1.21077	-0.275927	-1.18644	-0.246638	-1.05765	-0.0808562	1.02051	0.0292884	-1.22712	-0.295274	-1.10034	-0.137948	-1.40478	-0.490344	-1.23433	-0.30373	1.13809	0.186614	Ras-related protein Rab-37	58222	Mm.143789
C069R041	0.000741964	0.245296	0.00972279	-1.21783	-0.284316	-1.15236	-0.204586	1.07165	0.0998299	1.05682	0.0797299	1.06297	0.0880966	1.30243	0.381201	-1.22778	-0.296049	1.05466	0.0767845	1.29489	0.372834	14-3-3 protein gamma-1
C083R041	0.00602263	0.610955	0.196439	1.4606	0.546561	1.40238	0.487875	-1.01082	-0.0155213	-1.04152	-0.0586864	-1.11173	-0.152803	-1.29591	-0.373962	1.32802	0.409279	1.09386	0.129434	-1.21406	-0.279845	Retinal rod rhodopsin-sensitive cGMP 3',5'-cyclic phosphodiesterase subunit delta	403781	Cfa.723
C090R041	0.00342335	0.82846	0.608869	1.37232	0.456617	1.2639	0.33788	1.00564	0.00811087	-1.08578	-0.118737	-1.08997	-0.124287	-1.03528	-0.0500183	1.25199	0.324219	1.21399	0.279751	-1.0313	-0.0444686	Fatty-acid amide hydrolase 2-A	436973	Dr.76507
C151R041	0.00694269	0.522863	0.0124267	1.08413	0.116538	1.17983	0.23858	1.11632	0.158756	1.08827	0.122042	1.06188	0.0866263	1.2218	0.289009	1.03126	0.0444084	1.29131	0.368833	1.25216	0.324425	Transposable element Tcb1 transposase
C170R041	7.19577e-07	0.880625	0.437557	1.80488	0.851902	4.75084	2.24818	-1.27878	-0.354763	2.63222	1.39628	-1.2104	-0.275482	-1.00004	-6.1214e-05	1.90684	0.931183	6.075	2.60288	3.1859	1.6717	Ig mu chain C region membrane-bound form
C178R041	4.78691e-05	0.863045	0.0328522	1.35463	0.437894	1.25601	0.328848	-1.20289	-0.26651	-1.07851	-0.109046	-1.1488	-0.200123	-1.10464	-0.14358	1.41842	0.504281	1.36773	0.451778	-1.03706	-0.0525024	UNKNOWN
C017R042	0.00314316	0.210608	0.149149	-1.1508	-0.202638	-1.16537	-0.220783	-1.11844	-0.16149	-1.01266	-0.0181445	-1.07645	-0.106282	1.04316	0.0609661	-1.10759	-0.14743	1.00116	0.0016737	1.10888	0.149104	Coiled-coil domain-containing protein 47 precursor	447812	Dr.79744
C043R042	0.00613009	0.163566	0.00137222	1.39606	0.481358	1.14124	0.190602	-1.15412	-0.20679	-1.22328	-0.290756	-1.45178	-0.537818	-1.15899	-0.212868	1.10982	0.150331	1.13644	0.184524	1.02398	0.034193	UNKNOWN
C072R042	0.00728781	0.233808	0.0131712	1.37396	0.458337	1.12696	0.172432	-1.07921	-0.109981	-1.21917	-0.285904	-1.33334	-0.41504	-1.13242	-0.179412	1.11209	0.153279	1.07401	0.103002	-1.03546	-0.0502771	NADH dehydrogenase [ubiquinone] 1 beta subcomplex subunit 9	327660	Bt.3117
C078R042	0.00140987	0.314525	0.00195137	-1.63668	-0.710772	-1.33998	-0.422208	1.1998	0.262794	1.22142	0.288564	1.35629	0.439666	1.87807	0.90925	-1.44784	-0.5339	1.16817	0.224247	1.69132	0.758147	Heat shock 70 kDa protein 4	3308	Hs.90093
C084R042	0.0020647	0.17139	0.394619	1.36256	0.446324	1.33564	0.41753	-1.04949	-0.0696843	-1.02016	-0.0287938	-1.28937	-0.366662	1.11174	0.152817	1.10907	0.149346	1.55836	0.640031	1.40511	0.490685	2-amino-3-ketobutyrate coenzyme A ligase, mitochondrial precursor	23464	Hs.54609
C116R042	0.00733392	0.537627	0.60521	-1.18449	-0.244268	-1.39257	-0.477753	1.23232	0.301371	-1.17567	-0.233485	1.10168	0.139703	-1.13643	-0.184506	-1.32495	-0.405936	-1.95021	-0.96363	-1.47191	-0.557694	Neural cell adhesion molecule 1, 180 kDa isoform precursor
C136R042	0.000163407	0.537958	3.95638e-05	1.1909	0.252052	1.2469	0.318351	-1.22373	-0.291288	1.04703	0.0662986	-1.29972	-0.378198	-1.15408	-0.206745	1.12128	0.165142	1.32216	0.402893	1.17915	0.237751	40S ribosomal protein S25	443521	Oar.1096
C144R042	7.59216e-05	0.372206	0.891727	-1.13402	-0.181446	-1.04524	-0.0638318	1.03181	0.0451764	1.08494	0.117614	-1.05661	-0.0794415	1.03813	0.0539847	-1.23633	-0.306064	-1.03888	-0.0550234	1.19007	0.251041	UNKNOWN
C174R042	6.20551e-06	0.302437	0.556869	-1.45622	-0.542225	-1.46139	-0.547339	-1.08019	-0.111286	-1.00355	-0.00511426	1.04152	0.0586939	1.14175	0.191248	-1.29437	-0.372246	-1.18493	-0.244806	1.09235	0.12744	High mobility group protein B2	397130	Ssc.226
C182R042	0.00212705	0.183828	0.000582183	1.3111	0.390781	1.04482	0.0632576	-1.08376	-0.116048	-1.25486	-0.327523	-1.30758	-0.386899	-1.31823	-0.3986	1.08668	0.119929	-1.16416	-0.219295	-1.26508	-0.339224	Fumarylacetoacetate hydrolase domain-containing protein 1	302980	Rn.3918
C211R042	0.00879693	0.31381	0.714073	-1.25055	-0.322564	-1.35973	-0.443324	-1.01311	-0.0187861	-1.08731	-0.12076	1.20419	0.268059	-1.0898	-0.124058	-1.02507	-0.0357181	-1.46266	-0.548596	-1.42689	-0.512877	Heparan sulfate glucosamine 3-O-sulfotransferase 2	293451	Rn.49010
C216R042	0.000736095	0.247392	0.0878861	1.33054	0.412015	1.18344	0.242988	-1.0037	-0.00533512	-1.1243	-0.169027	-1.1811	-0.240125	-1.08362	-0.11586	1.13071	0.177225	1.09616	0.132463	-1.03151	-0.0447618	UNKNOWN
C242R042	0.00345226	0.799729	9.81631e-05	1.21959	0.286397	1.33227	0.41389	-1.26167	-0.335333	1.09239	0.127493	-1.36719	-0.451212	-1.30171	-0.380413	1.12546	0.170518	1.29129	0.368811	1.14734	0.198293	B-cell receptor-associated protein 31
C256R042	0.0093354	0.0455572	0.00193075	-1.00762	-0.010952	1.06846	0.0955349	1.26438	0.338434	1.0766	0.106487	1.01368	0.0196005	1.70654	0.771077	-1.25683	-0.329785	1.44211	0.528178	1.81248	0.857964	Sodium-dependent neutral amino acid transporter B(0)	664630	Rn.213283
C006R043	0.000581594	0.0380979	0.000710425	1.33873	0.420868	1.32738	0.408585	-1.10455	-0.143461	-1.00855	-0.0122828	-1.11676	-0.159324	-1.7209	-0.783166	1.32409	0.405005	-1.17375	-0.23112	-1.55415	-0.636125	Transmembrane protein 50A	23585	Hs.523054
C019R043	0.00237652	0.935522	1.77384e-05	-1.34837	-0.431214	-1.00654	-0.00940731	1.43566	0.521719	1.3396	0.421806	1.51377	0.598143	1.51148	0.595966	-1.2788	-0.354789	1.04597	0.0648403	1.33758	0.419629	Staphylococcal nuclease domain-containing protein 1	64635	Rn.36148
C027R043	0.00812832	0.118078	0.000551337	1.41381	0.499584	-1.00017	-0.000247901	-1.29134	-0.368872	-1.41405	-0.499832	-1.60172	-0.679618	-1.10433	-0.143171	1.13985	0.188838	1.16914	0.225454	1.0257	0.0366154	Hepatitis A virus cellular receptor 1 homolog precursor	171283	Mm.17771
C034R043	0.000159062	0.980448	0.0278263	-1.40021	-0.485641	-1.26484	-0.338955	-1.15884	-0.212685	1.10702	0.146687	-1.17832	-0.236735	-1.20182	-0.265221	-1.42375	-0.509691	-1.31175	-0.391491	1.08538	0.118201	86283 pfam03247, Prothymosin, Prothymosin/parathymosin family. Prothymosin alpha and parathymosin are two ubiquitous small acidic nuclear proteins that are thought to be involved in cell cycle progression, proliferation, and cell differentiation..
C124R043	0.00396922	0.111061	0.173631	1.0847	0.1173	1.22568	0.293582	-1.10181	-0.139876	1.12997	0.176282	1.07103	0.0989934	-1.18929	-0.250103	1.28002	0.356169	1.13552	0.183354	-1.12726	-0.172815	NFU1 iron-sulfur cluster scaffold homolog	56748	Mm.23809
C143R043	0.00552355	0.332128	0.368266	-1.11068	-0.151439	1.4455	0.531574	-1.20841	-0.273107	1.60549	0.683013	1.07835	0.108827	-1.13977	-0.188747	1.17324	0.230494	1.53255	0.615933	1.30626	0.385439	Retinoic acid receptor RXR-gamma-A	30464	Dr.348
C174R043	0.00162852	0.667023	0.0465828	-1.17637	-0.234336	-1.10651	-0.14602	1.05533	0.0776933	1.06313	0.0883163	1.11603	0.158382	1.05018	0.0706298	-1.11238	-0.153648	-1.11194	-0.153083	1.00039	0.000564508	UNKNOWN
C182R043	0.00448286	0.71647	0.835128	1.79515	0.844105	1.5991	0.677256	1.19326	0.254908	-1.1226	-0.166848	1.02764	0.0393414	-1.12199	-0.166056	1.546	0.628538	1.1944	0.256292	-1.29437	-0.372246	Lysozyme g
C183R043	0.000689192	0.310632	0.241288	1.36383	0.447664	1.26761	0.342106	-1.04429	-0.0625229	-1.07591	-0.105558	1.36267	0.446435	1.14718	0.198094	1.94076	0.956621	1.51858	0.602723	-1.27801	-0.353899	UNKNOWN
C187R043	0.00592501	0.115258	0.009684	1.06367	0.0890521	-1.04261	-0.0602059	-1.07177	-0.0999898	-1.109	-0.149258	-1.04356	-0.0615142	-1.40857	-0.494229	1.09242	0.127528	-1.37026	-0.454445	-1.4969	-0.581973	Reticulon-3	359721	Bt.16079
C192R043	0.00092025	0.990614	0.000417921	1.36554	0.449474	1.17716	0.235311	-1.31172	-0.391464	-1.16003	-0.214163	-1.33205	-0.413645	-1.34175	-0.424119	1.34471	0.427292	1.15081	0.202655	-1.16848	-0.224637	CD63 antigen	12512	Mm.277857; Mm.371552
C229R043	2.09659e-06	0.193978	0.582105	1.34626	0.428955	1.38956	0.474627	1.07595	0.105615	1.03216	0.0456715	-1.02536	-0.0361361	-1.12246	-0.166667	1.22027	0.287204	1.15057	0.202344	-1.06058	-0.0848596	Pituitary tumor-transforming gene 1 protein-interacting protein precursor	754	Hs.474010
C023R044	2.21692e-05	0.77066	2.46316e-05	-1.4733	-0.559048	-1.20369	-0.267464	1.30738	0.386681	1.22398	0.291585	1.426	0.511973	1.33674	0.41872	-1.35075	-0.433756	-1.17725	-0.235425	1.14737	0.198331	Heterogeneous nuclear ribonucleoprotein A1	15382; 654467	Mm.237064; Mm.432031
C042R044	0.00073124	0.50351	0.0021109	-1.57576	-0.656047	-1.34264	-0.425071	1.17023	0.22679	1.17363	0.230976	1.39366	0.478874	1.44207	0.528138	-1.32314	-0.403962	-1.08954	-0.123723	1.2144	0.280239	Neural cadherin-2 precursor
C050R044	0.00546744	0.0184281	0.174913	1.40847	0.494131	1.24031	0.310705	1.07481	0.104078	-1.13558	-0.183426	-1.28435	-0.361036	-1.04486	-0.0633059	1.02032	0.0290174	1.10444	0.143321	1.08245	0.114304	Protein MGR2 homolog	140823	Hs.472564
C104R044	0.000281164	0.0342879	0.0501936	1.51921	0.603323	1.1094	0.149777	1.11919	0.162458	-1.3694	-0.453545	-1.20864	-0.273379	-1.46076	-0.546716	1.1231	0.167485	-1.47365	-0.559397	-1.65506	-0.726882	Protein LBH
C117R044	0.000848841	0.0945132	0.0142139	-1.55257	-0.634662	-1.38016	-0.46484	-1.02127	-0.0303609	1.12492	0.169822	1.28651	0.363462	1.38022	0.464903	-1.18168	-0.240839	1.02131	0.0304239	1.20686	0.271263	G1/S-specific cyclin-D2	374047	Gga.3974
C123R044	0.0087755	0.218368	0.774418	1.09538	0.131431	1.17737	0.23557	-1.24705	-0.318524	1.07485	0.104138	-1.00093	-0.00133569	1.15945	0.213446	1.36473	0.448619	1.70236	0.767539	1.2474	0.31892	Probable tRNA pseudouridine synthase 2	496499	Str.15106
C157R044	0.00224686	0.577754	0.0238087	1.31107	0.390748	1.09438	0.130108	-1.09925	-0.136517	-1.19801	-0.26064	-1.2265	-0.294545	-1.10205	-0.140193	1.17505	0.23272	1.09159	0.126432	-1.07645	-0.106288	NADH dehydrogenase [ubiquinone] 1 beta subcomplex subunit 2, mitochondrial precursor
C162R044	0.00837421	0.143522	0.851487	1.07509	0.104451	1.16411	0.219222	-1.2115	-0.276794	1.0828	0.114771	1.12192	0.165968	1.03418	0.0484858	1.46126	0.547213	1.45852	0.544501	-1.00188	-0.0027113	Nucleolin		Xl.3189
C193R044	0.000898914	0.498318	0.646561	1.33658	0.418543	1.25596	0.328792	1.07794	0.108277	-1.06419	-0.0897513	-1.05648	-0.0792616	1.06032	0.0845005	1.17365	0.231004	1.23543	0.305015	1.05264	0.0740109	UNKNOWN
C199R044	0.00381847	0.0738592	0.411624	1.22952	0.29809	-1.14705	-0.197925	-1.42611	-0.512087	-1.41031	-0.496016	-1.08812	-0.121836	1.23163	0.300572	1.61143	0.688341	1.53127	0.614733	-1.05235	-0.0736081	Aryl hydrocarbon receptor nuclear translocator-like protein 1	374115	Gga.1329
C201R044	0.00610259	0.150016	2.43096e-05	-1.37567	-0.460136	-1.34354	-0.426043	1.18064	0.239571	1.02391	0.034093	1.50616	0.590879	1.41535	0.501159	-1.07835	-0.108827	-1.12074	-0.164455	-1.03931	-0.0556273	UNKNOWN
C205R044	0.00759265	0.879436	0.171279	1.21272	0.278252	1.0269	0.0382922	-1.11024	-0.150874	-1.18096	-0.239959	-1.10847	-0.148572	-1.03345	-0.0474711	1.21466	0.280554	1.1032	0.141696	-1.10103	-0.138859	Histone H1x	8971	Hs.75307
C214R044	0.00208511	0.0681183	0.698194	-1.41788	-0.503737	-1.40128	-0.486748	-1.10927	-0.149605	1.01185	0.0169885	1.22905	0.297548	-1.0268	-0.0381612	-1.04	-0.0565834	-1.29711	-0.375304	-1.24722	-0.318721	UNKNOWN
C017R045	0.000130093	0.579489	0.0031019	1.24522	0.316405	1.72163	0.783779	1.21731	0.283691	1.38259	0.467374	1.43462	0.52067	1.58896	0.668083	1.46752	0.553384	2.24726	1.16817	1.53133	0.614787	Beta-2-microglobulin precursor
C027R045	0.000244021	0.74017	0.0165547	1.34294	0.425394	1.29769	0.375941	-1.23177	-0.300731	-1.03487	-0.0494524	-1.24823	-0.319884	-1.09092	-0.125539	1.32523	0.406241	1.46524	0.551133	1.10565	0.144892	UNKNOWN
C070R045	0.000479582	0.55046	0.013803	1.3918	0.476957	1.64795	0.720669	1.21252	0.278014	1.18404	0.243712	1.23579	0.30543	1.67785	0.746612	1.41851	0.504372	2.28037	1.18927	1.60758	0.684895	Beta-2-microglobulin precursor
C099R045	0.00065663	0.161816	0.00345118	1.71831	0.780994	1.39345	0.478659	-1.09504	-0.13098	-1.23314	-0.302336	-1.53324	-0.616582	-1.34568	-0.428336	1.22722	0.295393	1.13391	0.181303	-1.08229	-0.11409	Tetraspanin-14	52588	Mm.28876
C150R045	0.00301549	0.563455	0.0247253	1.33942	0.421605	1.31242	0.39223	-1.18167	-0.240822	-1.02057	-0.029375	-1.32569	-0.406747	-1.08755	-0.121087	1.1939	0.25568	1.42599	0.511965	1.1944	0.256286	CD63 antigen	12512	Mm.277857; Mm.371552
C169R045	0.00203595	0.527623	0.639999	1.3625	0.446255	1.0512	0.0720411	-1.18675	-0.247016	-1.29613	-0.374214	-1.06464	-0.0903661	1.109	0.149263	1.51877	0.602904	1.3835	0.468319	-1.09778	-0.134585	Uncharacterized protein C3orf54	389119	Hs.86674
C225R045	0.00208221	0.0433828	0.221585	1.03392	0.0481255	-2.03901	-1.02787	1.09997	0.137463	-2.10818	-1.07599	-1.94636	-0.960778	1.00842	0.0121036	-2.0707	-1.05012	-2.22411	-1.15323	-1.07409	-0.103113	Hemoglobin subunit beta-1
C061R046	0.00101626	0.42614	0.00292707	1.29686	0.375019	1.30151	0.380189	-1.08356	-0.115783	1.00359	0.00516919	-1.19494	-0.256938	-1.282	-0.358397	1.17598	0.233864	1.10005	0.137574	-1.06902	-0.0962906	Lysosomal-associated transmembrane protein 4A	421959	Gga.2419
C065R046	0.000901222	0.367594	0.858521	1.38492	0.469801	1.46351	0.549434	1.03797	0.0537612	1.05675	0.0796333	1.13213	0.179041	-1.23197	-0.300969	1.51056	0.59508	1.14449	0.194704	-1.31985	-0.400376	5-aminolevulinate synthase, nonspecific, mitochondrial precursor
C069R046	0.00982488	0.674868	1.14474e-05	-1.08279	-0.114758	1.12644	0.171774	1.33273	0.414388	1.21971	0.286533	1.31695	0.397205	1.51425	0.598605	-1.09577	-0.131941	1.27986	0.355991	1.40243	0.487932	Pinin	5411	Hs.409965
C103R046	0.000453574	0.254524	0.665048	-1.23575	-0.305383	-1.56721	-0.648199	1.04427	0.0624917	-1.26823	-0.342816	-1.14394	-0.194005	1.2132	0.278821	-1.47619	-0.56188	-1.34898	-0.431869	1.0943	0.130011	UNKNOWN
C104R046	0.000590426	0.090211	0.00245367	1.38056	0.465249	1.27408	0.349459	-1.04235	-0.059844	-1.08357	-0.11579	-1.17005	-0.226569	-1.50981	-0.594367	1.22988	0.298523	-1.13687	-0.185064	-1.39822	-0.483588	Abhydrolase domain-containing protein 4	509896	Bt.28090
C114R046	0.0085505	0.0150263	1.05818e-05	1.17611	0.234024	-1.00101	-0.00145307	-1.11977	-0.163205	-1.1773	-0.235477	-1.50847	-0.593083	-2.12809	-1.08956	-1.1454	-0.195854	-1.90238	-0.927809	-1.66089	-0.731955	Scrapie-responsive protein 1 precursor	11341	Hs.7122
C159R046	8.89003e-09	0.302872	0.0875008	-1.77138	-0.824876	-1.91847	-0.939958	-1.05842	-0.0819103	-1.08304	-0.115082	-1.37049	-0.454687	-1.08629	-0.119411	-2.29366	-1.19765	-1.96899	-0.977459	1.16489	0.220195	Arrestin domain-containing protein 1	92714	Hs.12999
C168R046	0.00454474	0.467986	0.000902793	-1.36263	-0.446392	-1.042	-0.0593537	1.16881	0.225038	1.30771	0.387039	1.37013	0.454316	1.42633	0.512306	-1.16241	-0.217115	1.17114	0.227914	1.36134	0.445029	Transposable element Tcb1 transposase
C194R046	0.000162459	0.830896	0.000229677	1.40007	0.485501	1.20228	0.265775	-1.31864	-0.39905	-1.16451	-0.219726	-1.3777	-0.46226	-1.24372	-0.314665	1.34005	0.422291	1.2747	0.35016	-1.05127	-0.0721308	60S ribosomal protein L30
C205R046	0.00118972	0.13547	0.361496	1.29639	0.3745	1.07211	0.100455	-1.20707	-0.27151	-1.20919	-0.274045	-1.18378	-0.243402	1.18135	0.240431	1.3219	0.402608	1.5288	0.612396	1.15652	0.209788	Nucleolar GTP-binding protein 1	69237	Mm.41800
C223R046	0.00498767	0.0267963	1.38695e-11	1.1347	0.182311	-1.02996	-0.0425918	2.5742	1.36412	-1.1687	-0.224903	5.12754	2.35827	5.52047	2.46479	2.26021	1.17646	2.08216	1.05808	-1.08551	-0.118379	Signal transducer and activator of transcription 1-alpha/beta	6772	Hs.699271
C238R046	0.00172643	0.293178	0.215297	2.12042	1.08435	5.31873	2.41108	-3.4712	-1.79543	2.50833	1.32673	1.20385	0.267653	-1.8826	-0.912728	8.86082	3.14744	9.80683	3.29379	1.10676	0.146348	Cytosolic non-specific dipeptidase	55748	Hs.149185
C245R046	0.000660388	0.041137	0.434031	1.68882	0.756017	1.16369	0.218705	-1.18929	-0.250096	-1.45127	-0.537312	-1.47843	-0.564064	1.38179	0.466536	1.35853	0.442048	1.91234	0.935337	1.40765	0.493289	Mucosa-associated lymphoid tissue lymphoma translocation protein 1	10892	Hs.601217
C020R047	0.00224912	0.34165	0.00749377	6.11157	2.61154	4.28506	2.09931	-1.94176	-0.957364	-1.42625	-0.512229	-2.27512	-1.18594	-10.5462	-3.39865	5.21608	2.38297	-1.26749	-0.341975	-6.61133	-2.72494	Parvalbumin, thymic	396531	Gga.878
C030R047	0.00123242	0.238634	0.00226986	1.45461	0.540633	1.4893	0.574637	-1.13223	-0.179167	1.02385	0.0340039	-1.46363	-0.549552	-1.26459	-0.338669	1.12525	0.170248	1.33342	0.415135	1.185	0.244887	CD63 antigen	12512	Mm.277857; Mm.371552
C038R047	0.00190237	0.82117	0.286743	-1.01344	-0.0192604	1.57865	0.658692	1.03296	0.0467883	1.59987	0.677952	1.16681	0.22257	1.15591	0.209032	1.1146	0.156522	1.76655	0.820935	1.58492	0.664414	Glucocorticoid receptor DNA-binding factor 1	232906	Mm.28646; Mm.400358
C044R047	0.00789026	0.811971	0.0127872	1.31899	0.399428	1.05322	0.0748052	-1.16359	-0.218584	-1.25234	-0.324623	-1.27175	-0.346818	-1.18355	-0.243119	1.20681	0.271194	1.03546	0.0502701	-1.16548	-0.220924	Tetraspanin-4	64540	Mm.259477
C098R047	0.00837365	0.549102	0.0642714	1.28097	0.357242	1.28464	0.361369	-1.08656	-0.119767	1.00286	0.00412707	-1.07367	-0.102556	-1.32269	-0.403472	1.29635	0.374454	1.05531	0.0776642	-1.22841	-0.29679	UNKNOWN
C120R047	0.000598125	0.597799	0.011278	1.23846	0.308549	1.73497	0.794913	1.18813	0.248696	1.40091	0.486365	1.49469	0.579842	1.46425	0.550161	1.558	0.639695	2.13817	1.09638	1.37238	0.456684	Beta-2-microglobulin precursor
C137R047	0.00709206	0.41893	0.041427	-1.27948	-0.35556	-1.395	-0.480265	1.10483	0.143831	-1.09028	-0.124705	1.06885	0.0960656	1.40111	0.486573	-1.32255	-0.403325	-1.10001	-0.137522	1.2023	0.265803	FMRFamide-related neuropeptides precursor
C208R047	2.88911e-05	0.932134	0.542448	-1.52488	-0.608695	-1.46953	-0.555357	1.09657	0.133004	1.03766	0.0533382	1.05563	0.0780987	1.01064	0.0152662	-1.58403	-0.6636	-1.59449	-0.673094	-1.0066	-0.00949424	Contactin-associated protein-like 2 precursor	66797	Mm.440084
C012R048	0.00795318	0.545763	0.142245	1.46278	0.548711	1.23733	0.307228	1.17177	0.228687	-1.18221	-0.241483	1.0069	0.00991753	1.29253	0.370193	1.25696	0.329942	1.36484	0.448734	1.08583	0.118792	Annexin A11	100009511	Ocu.6390
C030R048	0.000433905	0.444744	0.668986	1.03961	0.0560363	1.63824	0.712143	1.14815	0.199311	1.57582	0.656107	-1.10292	-0.141329	1.08351	0.115715	-1.21808	-0.284604	1.54601	0.628547	1.88315	0.913151	COUP transcription factor 2	386585	Gga.4445
C034R048	0.00489782	0.0609172	0.595733	-1.0707	-0.0985533	1.09314	0.128474	1.17643	0.234418	1.17042	0.227027	-1.00595	-0.00856099	-1.09072	-0.125284	-1.2671	-0.341532	-1.17383	-0.231228	1.07946	0.110304	Kelch domain-containing protein 4	54758	Hs.123450
C035R048	7.10232e-08	0.0645043	0.623677	-1.47332	-0.559074	-1.23098	-0.299809	1.11172	0.152791	1.19687	0.259265	1.05937	0.0832044	-1.27914	-0.355179	-1.54613	-0.628661	-1.75051	-0.807779	-1.13219	-0.179118	UNKNOWN
C123R048	2.09059e-05	0.724595	0.474527	-1.77902	-0.831086	-2.33583	-1.22393	-1.22104	-0.288105	-1.31298	-0.392847	-1.08043	-0.11161	1.03009	0.0427704	-1.57417	-0.654591	-1.85711	-0.893058	-1.17974	-0.238467	Glutamate receptor U1 precursor	394374	Xl.1198
C125R048	0.0017652	0.264904	0.000533164	1.15161	0.203652	1.42653	0.512507	1.26982	0.344621	1.23872	0.308855	1.44633	0.532402	2.11831	1.08292	1.3117	0.391432	2.37974	1.2508	1.81425	0.859371	Beta-2-microglobulin precursor
C133R048	0.000868882	0.641929	2.23013e-06	1.21974	0.286572	1.18145	0.240559	-1.39949	-0.484905	-1.03241	-0.0460125	-1.29517	-0.373138	-1.47016	-0.555971	1.31799	0.398339	1.12466	0.169493	-1.1719	-0.228845	Eukaryotic translation initiation factor 3 subunit M	334626	Dr.25567
C178R048	0.00802985	0.0524291	0.00825097	-1.27157	-0.34661	-1.07944	-0.110283	-1.01374	-0.0196852	1.17799	0.236326	1.17722	0.235381	1.654	0.725961	-1.06551	-0.0915439	1.55333	0.635363	1.65509	0.726907	Myomodulin neuropeptides precursor
C182R048	9.57818e-05	0.577907	0.0152668	1.61066	0.68765	1.13608	0.184059	-1.3834	-0.468221	-1.41774	-0.503591	-1.37649	-0.460993	-1.08361	-0.115844	1.61875	0.694878	1.45039	0.536437	-1.11608	-0.158441	Ictacalcin
C205R048	0.00402094	0.17147	0.137192	1.09424	0.129928	1.0175	0.0250219	-1.03515	-0.0498352	-1.07542	-0.104906	1.05747	0.0806199	1.16509	0.22044	1.1978	0.260383	1.22714	0.295298	1.0245	0.0349146	Uncharacterized protein KIAA1279 homolog	423694	Gga.16847
C093R049	0.00972789	0.12353	2.45738e-10	1.17906	0.237635	1.22727	0.295456	2.98924	1.57978	1.04089	0.0578216	5.72203	2.51653	5.24162	2.39001	2.25697	1.17439	2.15202	1.10569	-1.04877	-0.0686933	Interferon-induced guanylate-binding protein 1
C170R049	0.00448594	0.538044	0.00370453	1.19916	0.26202	1.17602	0.233913	-1.16098	-0.215343	-1.01967	-0.028107	-1.11247	-0.153766	-1.31278	-0.392622	1.25145	0.323596	1.04004	0.0566331	-1.20327	-0.266963	mRNA turnover protein 4 homolog	51154	Hs.463797
C189R049	0.00702516	0.873724	0.0365925	1.29126	0.368781	1.02886	0.0410516	-1.11485	-0.15685	-1.25504	-0.327729	-1.18561	-0.245626	-1.211	-0.2762	1.2142	0.280004	-1.05577	-0.078299	-1.28192	-0.358303	NADH dehydrogenase [ubiquinone] iron-sulfur protein 4, mitochondrial precursor	4724	Hs.528222
C192R049	0.000374317	0.127945	0.867422	1.74961	0.807036	1.78374	0.834905	1.11324	0.154766	1.01951	0.0278688	-1.35254	-0.435675	1.15083	0.202677	1.16199	0.216595	1.84397	0.882816	1.58691	0.666221	UNKNOWN
C193R049	1.39142e-07	0.424518	0.608197	1.26463	0.338714	1.35102	0.434049	1.0141	0.0201994	1.06831	0.0953358	1.02467	0.0351617	-1.09633	-0.132684	1.27781	0.353676	1.21518	0.281166	-1.05154	-0.0725096	RNA-binding protein NOB1	360191	Bt.49199
C233R049	0.00109179	0.184308	0.0138604	-1.04567	-0.0644289	-1.45545	-0.541465	-1.09165	-0.126507	-1.39188	-0.477036	-1.43536	-0.521411	-1.14512	-0.195496	-1.37491	-0.459333	-1.52674	-0.610454	-1.11043	-0.151121	Nucleoredoxin-like protein 2	75124	Mm.179243
C244R049	0.00770894	0.0356145	0.00586034	-1.18942	-0.250254	-1.16412	-0.21924	-1.17067	-0.227339	1.02173	0.0310142	1.01506	0.0215694	-1.69818	-0.763989	-1.00093	-0.00134563	-1.68867	-0.75589	-1.6871	-0.754545	112077 pfam03247, Prothymosin, Prothymosin/parathymosin family. Prothymosin alpha and parathymosin are two ubiquitous small acidic nuclear proteins that are thought to be involved in cell cycle progression, proliferation, and cell differentiation.
C040R050	0.000214809	0.486154	0.000356302	-1.08443	-0.116941	1.39369	0.478907	1.28468	0.361404	1.51136	0.595848	1.32282	0.403618	1.68184	0.750037	-1.05316	-0.0747269	1.82455	0.86754	1.92155	0.942267	1-phosphatidylinositol-4,5-bisphosphate phosphodiesterase gamma-2	5336	Hs.413111
C047R050	0.00701256	0.061482	0.531005	-1.03933	-0.0556496	-1.04756	-0.0670315	1.10668	0.146243	-1.00792	-0.0113819	-1.08789	-0.121535	1.0567	0.079572	-1.2513	-0.323428	-1.09711	-0.133703	1.14055	0.189725	Protein pob	406826	Dr.80620
C075R050	0.000181281	0.0910751	0.000285633	4.39535	2.13598	1.75726	0.813324	-1.56896	-0.649808	-2.50126	-1.32265	-4.01583	-2.0057	-2.07026	-1.04981	1.71723	0.780086	1.33175	0.413322	-1.28946	-0.366764	Serotransferrin-2 precursor
C078R050	0.00186423	0.548329	0.353611	-1.17244	-0.229514	-1.06153	-0.0861384	-1.06381	-0.0892435	1.10449	0.143376	-1.11486	-0.156864	1.03375	0.0478819	-1.2287	-0.297135	1.03597	0.050987	1.2729	0.348122	Neuromodulin	380030	Xl.1133
C092R050	0.00040744	0.802846	0.501758	1.40005	0.485475	1.68171	0.749928	-1.05221	-0.0734186	1.20118	0.264452	-1.15944	-0.213428	1.00286	0.00411481	1.27056	0.345466	1.77456	0.827461	1.39667	0.481995	Cocaine- and amphetamine-regulated transcript protein precursor	493726	Bt.20015
C106R050	0.00293505	0.0534549	0.141296	-1.0191	-0.027298	-1.12265	-0.16691	1.11936	0.16267	-1.10161	-0.139612	-1.13073	-0.177256	-1.32094	-0.401569	-1.28987	-0.367224	-1.65996	-0.73115	-1.28692	-0.363926	U6 snRNA-associated Sm-like protein LSm4	25804	Hs.515255
C109R050	2.15675e-06	0.177478	0.00536974	1.98522	0.989302	1.76831	0.822371	-1.09184	-0.126762	-1.12267	-0.16693	-1.51272	-0.597148	-1.29995	-0.378453	1.43288	0.518916	1.48522	0.570681	1.03653	0.0517645	Ictacalcin
C140R050	0.00166412	0.860286	0.0128957	-1.12072	-0.16442	1.17301	0.230209	1.10858	0.148716	1.3146	0.394629	1.1642	0.219343	1.18172	0.240884	-1.06717	-0.0937924	1.25039	0.322377	1.33438	0.416169	Zinc finger BED domain-containing protein 5	612956	Cfa.1579
C155R050	0.000677386	0.385232	0.0447306	1.45424	0.540261	1.26205	0.335767	-1.02364	-0.0337133	-1.15228	-0.204494	-1.16075	-0.215059	-1.32243	-0.403189	1.28246	0.358915	-1.02364	-0.0337087	-1.31278	-0.392624	Phosducin-like protein 3	68833	Mm.28121
C177R050	0.000478034	0.994468	0.600327	-1.17297	-0.230161	-1.20491	-0.268929	-1.02622	-0.0373455	-1.02724	-0.0387676	-1.01806	-0.0258187	-1.01909	-0.027283	-1.16363	-0.218634	-1.19654	-0.258866	-1.02828	-0.0402319	Iron-responsive element-binding protein 2	64831	Rn.10132
C217R050	0.00025539	0.759021	0.247695	-1.30077	-0.379363	-1.47507	-0.560786	-1.05124	-0.0720876	-1.134	-0.181423	-1.17744	-0.235656	-1.06788	-0.0947476	-1.45693	-0.542932	-1.49842	-0.583447	-1.02848	-0.0405142	AP-2 complex subunit mu-1	116563	Rn.3172
C224R050	0.00515614	0.203572	0.00469482	1.26904	0.343739	-1.04822	-0.0679481	-1.06008	-0.0841752	-1.33024	-0.411688	-1.30334	-0.38221	-1.2167	-0.282969	1.03219	0.0457043	-1.20309	-0.266742	-1.24181	-0.312446	26S proteasome non-ATPase regulatory subunit 9	161475	Rn.24127
C258R050	0.00348565	0.719577	0.00245712	-1.3753	-0.459748	1.18932	0.250139	1.62817	0.703251	1.63568	0.709887	1.46486	0.55076	1.2849	0.361658	-1.52863	-0.61224	-1.06544	-0.0914541	1.43474	0.520786	THO complex subunit 2	57187	Hs.592243
C109R051	0.00451397	0.414442	0.608747	-1.22089	-0.287937	-1.21099	-0.276192	-1.02176	-0.0310523	1.00817	0.0117452	-1.04539	-0.0640402	1.16879	0.225012	-1.24913	-0.320925	-1.01405	-0.0201273	1.23183	0.300798	Inhibitor of growth protein 4	418281	Gga.7799
C202R051	0.00985284	0.683005	0.966751	1.14364	0.193629	1.10603	0.145385	1.00125	0.00180177	-1.03401	-0.0482441	1.05815	0.081542	-1.05297	-0.0744601	1.20863	0.273369	1.04908	0.0691229	-1.15208	-0.204246	UNKNOWN
C204R051	0.00835986	0.810806	0.0511128	1.23587	0.305526	1.13739	0.185727	-1.10112	-0.138978	-1.08658	-0.119798	-1.17004	-0.226563	-1.08405	-0.116434	1.16307	0.21794	1.1553	0.20827	-1.00673	-0.00966951	Activator of basal transcription 1
C218R051	0.00453677	0.655983	0.000181665	1.31648	0.396689	1.46132	0.547269	1.50181	0.586706	1.11002	0.15058	1.37762	0.462175	1.75884	0.814623	1.20761	0.272158	1.71141	0.775186	1.41719	0.503028	SH3 and PX domain-containing protein 2B	268396
C222R051	0.000264638	0.52499	0.964613	1.63601	0.710185	1.27731	0.353103	-1.01896	-0.0271019	-1.28083	-0.357082	-1.135	-0.182693	1.17131	0.228127	1.46876	0.554594	1.5245	0.608333	1.03795	0.0537387	Peroxiredoxin-5, mitochondrial precursor	25824	Hs.502823
C233R051	0.000242168	0.682141	0.127159	1.42789	0.513882	1.35923	0.442788	1.07128	0.0993364	-1.05051	-0.0710942	1.26637	0.340699	1.15124	0.203186	1.68792	0.755244	1.46068	0.546638	-1.15557	-0.208607	Keratin, type I cytoskeletal 18
C056R052	0.00857603	0.322244	0.206918	-1.23109	-0.29994	1.13145	0.178178	-1.00004	-6.29425e-05	1.39293	0.478118	1.20317	0.266837	1.05242	0.0737139	-1.02317	-0.0330402	1.19082	0.251955	1.21841	0.284995	FK506-binding protein 8		Hs.173464
C069R052	0.0089001	0.955293	0.0334347	-1.44478	-0.53085	1.1323	0.17926	1.26715	0.341585	1.63593	0.71011	1.36601	0.449963	1.33622	0.418157	-1.34022	-0.422472	1.19402	0.255832	1.60026	0.678304	Bromodomain-containing protein 4	57261	Mm.253518; Mm.395253
C111R052	0.00541142	0.326226	6.20645e-05	-1.37134	-0.455582	-1.10603	-0.145386	1.3162	0.396381	1.23988	0.310196	1.54921	0.631532	1.23522	0.304767	-1.16508	-0.220432	-1.17854	-0.237	-1.01155	-0.0165681	75061 PRK05648, PRK05648, DNA polymerase III subunits gamma and tau.
C129R052	0.000891719	0.405186	0.568036	-1.1111	-0.151983	-1.16253	-0.217269	1.11059	0.151329	-1.04629	-0.065286	-1.00634	-0.00911277	-1.01997	-0.0285229	-1.24179	-0.312425	-1.31688	-0.397121	-1.06046	-0.0846961	Ras-related protein Rab-11B
C160R052	0.000615675	0.705164	0.0590189	-1.4928	-0.578017	-1.25246	-0.324765	1.37126	0.455502	1.19189	0.253251	1.23518	0.304723	1.0942	0.12987	-1.65725	-0.728795	-1.5696	-0.650397	1.05585	0.0783984	Low molecular weight neuronal intermediate filament
C195R052	0.00138777	0.828421	8.56414e-05	1.40392	0.489463	1.25352	0.325987	-1.32159	-0.402276	-1.11998	-0.163476	-1.44225	-0.528318	-1.41608	-0.501901	1.28647	0.363421	1.16988	0.226363	-1.09966	-0.137059	60S ribosomal protein L4-A		Xl.8672
C204R052	0.00671917	0.465707	0.135411	1.18301	0.242462	-1.1133	-0.154847	-1.18843	-0.249055	-1.31705	-0.397308	-1.13712	-0.185382	1.0252	0.0359042	1.23639	0.306134	1.09438	0.130113	-1.12976	-0.176022	39S ribosomal protein L51, mitochondrial precursor	797002	Dr.80762
C217R052	0.00770854	0.273378	4.05321e-05	1.7965	0.845189	1.00247	0.00355273	-1.6675	-0.737685	-1.79208	-0.841636	-2.38525	-1.25414	-1.54531	-0.627895	1.25591	0.328733	1.08173	0.113343	-1.16102	-0.21539	Ependymin-2 precursor
C030R053	0.00155717	0.29198	0.00437448	-1.38518	-0.470073	-1.10852	-0.148634	1.20064	0.263805	1.24958	0.321439	1.1778	0.236095	1.73644	0.796135	-1.41204	-0.497783	1.30468	0.383696	1.84226	0.881479	Neuromodulin
C031R053	0.0015691	0.131885	0.0613969	1.24545	0.316669	1.34207	0.424463	1.02843	0.0404454	1.07758	0.107794	-1.15294	-0.205317	-1.15264	-0.204937	1.05038	0.0709068	1.13216	0.179081	1.07786	0.108174	Nucleolar protein 66	79697	Hs.509916
C101R053	0.00913411	0.409936	0.578235	1.2524	0.324701	1.3395	0.421696	1.0439	0.0619839	1.06954	0.0969955	1.0301	0.0427897	-1.20472	-0.2687	1.23585	0.305506	1.06512	0.0910119	-1.1603	-0.214494	UNKNOWN
C160R053	0.00124644	0.289834	0.208992	2.07707	1.05455	5.12502	2.35756	-3.45849	-1.79014	2.46743	1.30301	1.14672	0.197515	-1.71305	-0.776569	8.23748	3.0422	10.3469	3.37113	1.25608	0.328928	Cytosolic non-specific dipeptidase	55748	Hs.149185
C161R053	0.00401964	0.453183	0.851055	-1.56742	-0.648396	-1.35225	-0.435359	-1.06152	-0.0861291	1.15913	0.213036	1.18365	0.243242	-1.05607	-0.0787008	-1.24749	-0.319025	-1.3453	-0.427931	-1.07841	-0.108906	Heat shock factor-binding protein 1	767979	Bt.49471
C162R053	0.00552477	0.856513	1.08006e-06	1.46497	0.550869	-1.04092	-0.0578653	-1.8381	-0.878216	-1.52492	-0.608734	-2.03446	-1.02464	-1.80487	-0.851894	1.32358	0.404442	-1.0221	-0.0315429	-1.35283	-0.435985	UNKNOWN
C196R053	0.00445702	0.736825	0.000362059	1.2866	0.363562	1.08533	0.118138	-1.23085	-0.299652	-1.18544	-0.245424	-1.3377	-0.419752	-1.22512	-0.292919	1.18383	0.243462	1.09041	0.124871	-1.08567	-0.118591	UNKNOWN
C226R053	0.0043907	0.845814	0.000290516	1.22686	0.294973	-1.19454	-0.256461	-1.34322	-0.425692	-1.46554	-0.551435	-1.43619	-0.522247	-1.52494	-0.608756	1.14744	0.198419	-1.35616	-0.439525	-1.55611	-0.637944	Brain protein 44-like protein	55951	Mm.288510
C041R054	0.00497566	0.0212827	0.00420474	1.1613	0.21574	1.25988	0.333287	1.31889	0.399329	1.08489	0.117546	-1.0448	-0.0632214	1.42094	0.506848	-1.18658	-0.24681	1.35736	0.440805	1.61062	0.687615	Transmembrane protein 63A	208795	Mm.185518
C095R054	1.21626e-05	0.267054	0.0636457	1.68801	0.755325	1.42741	0.513399	-1.04627	-0.0652553	-1.18257	-0.241927	-1.31958	-0.400083	-1.09548	-0.131557	1.33839	0.420498	1.36329	0.447097	1.01861	0.0265987	Peroxiredoxin-5, mitochondrial precursor	25824	Hs.502823
C105R054	0.00142991	0.359534	0.906098	-1.1167	-0.159241	-1.24587	-0.31715	1.11469	0.156643	-1.11567	-0.157909	1.01168	0.0167591	-1.15469	-0.207505	-1.2304	-0.299125	-1.60358	-0.681298	-1.3033	-0.382173	UNKNOWN
C172R054	3.12626e-05	0.841657	0.00849965	1.1814	0.2405	1.42723	0.513219	-1.20539	-0.269497	1.20808	0.272719	-1.13032	-0.17673	-1.16304	-0.217901	1.25986	0.333267	1.4792	0.564815	1.17409	0.231548	Methyltransferase-like protein 9 precursor	416623	Gga.7118
C175R054	0.00440318	0.967689	0.0876835	1.33212	0.413727	1.14792	0.199023	-1.12623	-0.1715	-1.16047	-0.214704	-1.16645	-0.222126	-1.12581	-0.170959	1.28619	0.363102	1.14835	0.199564	-1.12003	-0.163538	Histone deacetylase complex subunit SAP18	615692	Bt.48904
C244R054	0.00126443	0.769211	0.000625913	1.45996	0.545933	1.24043	0.310839	-1.40183	-0.487311	-1.17698	-0.235094	-1.49691	-0.58199	-1.27299	-0.348225	1.36723	0.451255	1.36597	0.449926	-1.00092	-0.00132929	Alpha-2-macroglobulin precursor
C245R054	0.00578671	0.0656335	9.30296e-14	1.1129	0.154321	1.32869	0.410006	5.26017	2.39511	1.1939	0.255685	11.3517	3.50484	9.90001	3.30743	2.40169	1.26405	2.50069	1.32233	1.04122	0.0582776	BAG family molecular chaperone regulator 3	9531	Hs.523309
C082R055	0.00150481	0.151334	0.926554	1.20419	0.268059	1.29188	0.369474	1.04327	0.0611059	1.07283	0.101415	-1.14503	-0.195381	1.11425	0.156067	1.00805	0.011572	1.37978	0.464435	1.36875	0.452863	Cytochrome c oxidase subunit 1	808314
C163R055	0.000112289	0.713679	7.91375e-05	-1.50006	-0.585019	-1.01027	-0.014745	1.31745	0.397747	1.48481	0.570274	1.48756	0.57295	1.46723	0.553095	-1.32852	-0.409816	1.10237	0.140603	1.46451	0.550418	Nuclear ubiquitous casein and cyclin-dependent kinases substrate	98415	Mm.246869; Mm.392848; Mm.436518; Mm.450754
C164R055	0.00019149	0.662747	0.000798428	1.36576	0.4497	1.29536	0.373355	-1.15631	-0.209527	-1.05434	-0.0763453	-1.2673	-0.34176	-1.28223	-0.358652	1.24614	0.317468	1.16815	0.22423	-1.06676	-0.0932377	Transmembrane protein 50A	71817	Mm.88349
C202R055	0.00124078	0.552572	0.000761793	1.40318	0.488696	1.08261	0.114511	-1.18992	-0.250868	-1.29611	-0.374185	-1.37872	-0.463325	-1.29277	-0.370466	1.21103	0.27624	-1.00353	-0.00508705	-1.21531	-0.281327	Eukaryotic translation initiation factor 3 subunit K	515326	Bt.53466
C205R055	1.39918e-05	0.421736	0.937986	-1.3126	-0.392432	-1.41069	-0.496402	1.11793	0.160835	-1.07473	-0.10397	-1.07713	-0.107189	-1.02085	-0.0297712	-1.58058	-0.660456	-1.60994	-0.687009	-1.01858	-0.0265526	UNKNOWN
C216R055	0.000353319	0.615146	0.0569153	1.31976	0.400279	1.12561	0.170709	-1.18296	-0.242403	-1.17249	-0.229571	-1.18515	-0.245071	-1.02229	-0.0318027	1.31733	0.397612	1.30252	0.38131	-1.01136	-0.0163023	UNKNOWN
C256R055	0.00219802	0.0360122	0.000187551	1.07596	0.10563	1.07343	0.102227	1.05608	0.0787227	-1.00236	-0.00340298	1.46364	0.549563	1.51883	0.602956	1.4912	0.57647	1.54377	0.62646	1.03526	0.0499902	Probable G-protein coupled receptor 97 precursor	222487	Hs.383403
C005R056	0.00606057	0.148785	0.526331	1.46478	0.55068	1.69536	0.76159	1.10872	0.148898	1.15742	0.21091	-1.36413	-0.447979	1.00653	0.00939482	-1.03254	-0.0461978	1.5391	0.622086	1.58918	0.668284	Protachykinin-1 precursor	100009275	Ocu.2078
C032R056	1.61723e-05	0.871085	0.0441001	-1.40612	-0.491722	-1.3618	-0.445519	1.08623	0.119327	1.03254	0.0462031	1.14862	0.199902	1.14833	0.199534	-1.32974	-0.411146	-1.28816	-0.365312	1.03228	0.0458348	Caprin-1	362173	Rn.22572
C042R056	0.00106379	0.277319	0.633379	-1.80972	-0.855768	-1.50139	-0.586297	-1.16267	-0.217436	1.20537	0.269471	1.1914	0.25266	1.13233	0.179301	-1.30647	-0.385671	-1.14042	-0.18956	1.14561	0.196111	Dystrobrevin alpha	1837	Hs.695993
C043R056	0.00559699	0.241293	0.00697192	1.50155	0.586449	-1.01158	-0.0166076	-1.08875	-0.12267	-1.51893	-0.603056	-1.48787	-0.573245	-1.37048	-0.454681	1.09876	0.135874	-1.27334	-0.348619	-1.39909	-0.484492	UNKNOWN
C050R056	0.00587866	0.175059	3.5109e-05	1.29758	0.375825	1.2478	0.319382	-1.16318	-0.218073	-1.0399	-0.0564428	-1.41594	-0.501759	-1.27815	-0.35406	1.06595	0.0921379	1.13555	0.183394	1.0653	0.0912563	60S ribosomal protein L12	6136	Hs.408054
C052R056	0.00845343	0.175065	0.0208956	1.0147	0.0210499	1.13942	0.188301	1.00499	0.00717463	1.12292	0.167251	1.15812	0.211781	1.40563	0.491221	1.16931	0.225656	1.59366	0.672348	1.36291	0.446692	Leupaxin	107321	Mm.313136
C109R056	1.6558e-05	0.152092	0.0336255	-1.3458	-0.428469	-1.6117	-0.688584	1.00289	0.00415897	-1.19757	-0.260116	-1.49086	-0.576145	-1.32325	-0.404081	-2.0122	-1.00877	-2.13883	-1.09682	-1.06293	-0.0880517	Farnesyl pyrophosphate synthetase		Gga.42725
C171R056	5.88655e-05	0.848526	0.00720266	1.48862	0.573971	1.27141	0.346432	-1.20123	-0.264507	-1.17084	-0.227539	-1.28631	-0.363243	-1.18144	-0.240552	1.39014	0.475235	1.2927	0.370387	-1.07538	-0.104848	Receptor expression-enhancing protein 5
C215R056	0.00274715	0.911484	9.80814e-06	1.37691	0.461432	1.09445	0.130201	-1.48808	-0.57345	-1.25809	-0.331231	-1.57301	-0.653524	-1.46301	-0.548937	1.30257	0.381358	1.1132	0.154714	-1.17011	-0.226643	Eukaryotic translation initiation factor 3 subunit K	515326	Bt.53466
C032R057	0.0042361	0.413463	0.00790288	1.14308	0.192921	1.30164	0.380329	-1.13681	-0.184995	1.13872	0.187408	-1.30232	-0.381088	-1.10697	-0.146615	-1.0022	-0.00317246	1.33673	0.418709	1.33967	0.421881	UNKNOWN
C038R057	0.00621768	0.701658	0.00267368	-1.19853	-0.261271	1.12323	0.167654	1.16162	0.216137	1.34623	0.428925	1.28378	0.360396	1.31147	0.39119	-1.08449	-0.117012	1.26813	0.342707	1.37527	0.459719	110496 pfam01498, Transposase_5, Transposase. Transposase proteins are necessary for efficient DNA transposition. This family includes the amino-terminal region of Tc1, Tc1A, Tc1B and Tc2B transposases of C.elegans. The region encompasses the specific...
C060R057	4.76997e-05	0.122771	0.00437342	1.06018	0.0843092	1.48985	0.575168	1.04162	0.0588243	1.40528	0.490859	1.4256	0.511571	1.37707	0.461598	1.45101	0.537056	1.96965	0.977941	1.35744	0.440885	Mitogen-activated protein kinase kinase kinase 14	9020	Hs.404183
C144R057	0.00390589	0.566125	0.480595	1.26478	0.338882	-1.19546	-0.257565	-1.20632	-0.270616	-1.51199	-0.596447	-1.07353	-0.102358	1.06566	0.0917411	1.42123	0.50714	1.07534	0.104792	-1.32166	-0.402348	Serine hydrolase-like protein 2	253190	Hs.360940; Hs.656672
C156R057	0.00294578	0.845245	0.23511	1.36619	0.450163	1.18551	0.245504	-1.10695	-0.146589	-1.15241	-0.204659	-1.15924	-0.213178	-1.03122	-0.0443583	1.30457	0.383574	1.27256	0.347735	-1.02515	-0.0358389	Clusterin precursor
C184R057	0.00669239	0.115932	0.403839	1.35224	0.435354	1.1834	0.242943	-1.21873	-0.285379	-1.14267	-0.192411	-1.34087	-0.423171	1.28005	0.356205	1.22907	0.297562	1.84616	0.884527	1.50208	0.586965	Syntaxin-binding protein 2	403880	Cfa.3744
C202R057	0.0040783	0.458447	0.262983	-1.18779	-0.248278	-1.21936	-0.286125	1.04001	0.0565966	-1.02658	-0.0378479	-1.11291	-0.154342	-1.22954	-0.298115	-1.37479	-0.459216	-1.55923	-0.640837	-1.13416	-0.181621	Nuclear autoantigenic sperm protein	100009592	Ocu.1939
C223R057	0.00596951	0.651007	0.469975	1.35134	0.43439	2.00918	1.00661	1.18935	0.250177	1.48681	0.572216	-1.07811	-0.108498	1.28723	0.364267	1.05388	0.0757147	2.17452	1.1207	2.06334	1.04498	Thyroliberin type A precursor
C022R058	0.00682837	0.356756	0.0265895	-1.15455	-0.207327	1.14288	0.19268	1.0373	0.0528337	1.31951	0.400007	1.22114	0.288225	1.17589	0.233748	1.01964	0.0280646	1.29558	0.373595	1.27062	0.34553	UNKNOWN
C040R058	0.00483078	0.161481	0.458505	1.2095	0.274411	1.42241	0.508332	-1.00825	-0.011848	1.17603	0.233922	-1.33771	-0.41977	1.10556	0.144778	-1.09696	-0.133511	1.58552	0.664959	1.73926	0.79847	Prolyl 3-hydroxylase 2 precursor	414143	Gga.20087
C126R058	0.000170264	0.84959	0.0258472	-1.29004	-0.36742	-1.11233	-0.153585	1.1023	0.140523	1.15977	0.213835	1.15603	0.209181	1.09371	0.129229	-1.23009	-0.298762	-1.12107	-0.164879	1.09724	0.133883	UNKNOWN
C136R058	0.00726878	0.478288	0.0760743	-1.16226	-0.216939	-1.21877	-0.285431	1.18947	0.250315	-1.04862	-0.0684926	1.22162	0.288792	-1.00907	-0.0130254	-1.13168	-0.178461	-1.46284	-0.548771	-1.29263	-0.37031	Serine/threonine-protein kinase N2		Rn.30325
C139R058	2.29542e-08	0.476616	0.373521	-3.50784	-1.81058	-2.4534	-1.29478	1.26441	0.338468	1.42979	0.515805	1.39974	0.485162	-1.17022	-0.226785	-3.1687	-1.66389	-3.63016	-1.86003	-1.14563	-0.196143	Transforming growth factor-beta-inducible early growth response protein 3		Mm.9616
C174R058	5.16363e-05	0.402673	0.372589	-1.47038	-0.556189	-1.40702	-0.492642	1.11439	0.15626	1.04503	0.0635474	1.2074	0.271902	-1.09277	-0.127988	-1.35712	-0.440547	-1.71343	-0.77689	-1.26255	-0.336343	UNKNOWN
C175R058	2.09391e-05	0.518774	0.00027645	-2.25794	-1.17501	-1.91379	-0.93643	1.38774	0.472734	1.17983	0.238576	1.78196	0.833467	1.86806	0.901539	-1.75841	-0.814274	-1.42171	-0.507626	1.23683	0.306648	Paired box protein Pax[Zf-a]	30567	Dr.24244
C179R058	0.000858833	0.967765	1.64249e-06	1.22343	0.290937	1.12644	0.171774	-1.30425	-0.383225	-1.08611	-0.119164	-1.32948	-0.410864	-1.296	-0.374067	1.20022	0.263298	1.13362	0.180931	-1.05875	-0.0823672	WW domain-binding protein 2	23558	Hs.514489
C202R058	0.0074922	0.0705633	0.0289892	1.04135	0.0584493	1.03117	0.044277	-1.0195	-0.0278546	-1.00987	-0.0141724	1.19307	0.25468	1.13503	0.182725	1.26662	0.340984	1.19322	0.254856	-1.06152	-0.0861274	Apoptotic chromatin condensation inducer in the nucleus	22985	Hs.124490
C214R058	0.000285999	0.104388	0.561892	-1.17091	-0.227632	-1.21173	-0.277065	1.25766	0.330739	-1.03486	-0.0494322	-1.08682	-0.12011	-1.01892	-0.0270475	-1.60045	-0.678481	-1.55278	-0.634851	1.0307	0.0436302	UNKNOWN
C001R059	0.000694033	0.432049	0.107348	1.20445	0.268371	1.24794	0.319553	-1.07234	-0.100763	1.03611	0.0511814	-1.00438	-0.00630515	-1.1983	-0.26099	1.28595	0.362829	1.11677	0.159326	-1.15149	-0.203504	Glycogen phosphorylase, muscle form	5837	Hs.154084
C043R059	0.000386177	0.05893	0.000305264	1.43539	0.52144	1.39979	0.485214	-1.08942	-0.123554	-1.02543	-0.0362267	-1.43998	-0.526052	-1.2612	-0.334797	1.08594	0.118943	1.20913	0.273971	1.11344	0.155028	60S ribosomal protein L4-B		Xl.8805
C062R059	0.000355139	0.746477	0.0236707	-1.369	-0.453124	1.04798	0.0676101	-1.13325	-0.180468	1.43469	0.520734	-1.14037	-0.189503	-1.30282	-0.381633	-1.3776	-0.46216	-1.09699	-0.133556	1.2558	0.328604	Calpain-1 catalytic subunit	396240	Gga.1707
C081R059	0.00237051	0.179754	0.0772074	-1.0812	-0.11263	1.08787	0.121511	1.01937	0.0276765	1.17621	0.234141	1.01368	0.0196034	1.33726	0.419281	-1.08726	-0.120703	1.42713	0.513116	1.55167	0.633819	Peripheral myelin protein 22	5376	Hs.372031
C092R059	0.00469592	0.157884	5.82212e-07	1.29456	0.372457	1.25437	0.326968	1.6707	0.740448	-1.03203	-0.0454892	1.6476	0.720369	2.77914	1.47464	1.27666	0.352378	2.08661	1.06116	1.63442	0.708781	Eukaryotic initiation factor 4A-II	395232	Gga.4580
C122R059	0.000905143	0.629576	0.0617024	-1.44175	-0.52782	-1.29264	-0.370318	1.05148	0.0724208	1.11535	0.157502	1.18367	0.243272	1.22288	0.290282	-1.28073	-0.356969	-1.11146	-0.152457	1.1523	0.204512	Probable cation-transporting ATPase 13A1	57130	Hs.501794
C129R059	3.5306e-05	0.0319765	0.131829	1.68832	0.755585	1.14639	0.197095	-1.18584	-0.245909	-1.47273	-0.558491	-1.46368	-0.549605	1.20809	0.272726	1.36783	0.45189	1.64231	0.71573	1.20067	0.26384	Forkhead box protein C1		Mm.12949
C143R059	1.31672e-05	0.448274	1.05788e-05	1.21258	0.278082	1.34191	0.424286	-1.13758	-0.185967	1.10665	0.146204	-1.21906	-0.285766	-1.26564	-0.339864	1.13154	0.178283	1.20613	0.270389	1.06593	0.0921062	Nascent polypeptide-associated complex subunit alpha	195823	Dr.29735
C187R059	0.00971416	0.0322806	0.000196904	1.11052	0.151234	1.1976	0.260147	1.58724	0.666519	1.07842	0.108913	1.12853	0.174446	2.89495	1.53354	-1.26649	-0.34084	2.18429	1.12716	2.76639	1.468	SH3 adapter protein SPIN90	80987	Mm.192416
C206R059	1.6101e-05	0.181312	0.0779325	1.65825	0.729661	1.36196	0.445685	-1.44814	-0.534201	-1.21755	-0.283976	-1.36406	-0.44791	1.13337	0.180622	1.76046	0.815952	2.23536	1.16051	1.26976	0.344556	Angiopoietin-related protein 5 precursor	253935	Hs.318370
C227R059	3.78903e-05	0.740839	0.811502	-1.14803	-0.199159	-1.31215	-0.391935	1.03679	0.0521198	-1.14296	-0.192776	-1.02907	-0.0413441	1.02359	0.0336338	-1.22487	-0.292623	-1.32907	-0.410421	-1.08508	-0.117798	Histone H2A.x	444528	Xl.15663
C253R059	0.00140633	0.104408	0.0111639	-1.05466	-0.0767755	1.07877	0.109391	1.19582	0.258004	1.13774	0.186167	-1.00729	-0.0104837	1.27438	0.349797	-1.27038	-0.345264	1.14964	0.201184	1.46049	0.546448	UNKNOWN
C020R060	0.00418241	0.483521	0.0408172	1.36663	0.450627	1.92255	0.943022	-1.07607	-0.105773	1.40678	0.492395	-1.21266	-0.278177	-1.5113	-0.595787	1.2127	0.278223	1.36889	0.453007	1.1288	0.174785	Nck-associated protein 1-like		Hs.182014
C031R060	0.00391063	0.669795	0.0530376	-1.25806	-0.331198	-1.0278	-0.0395599	1.06902	0.0962915	1.22403	0.291638	1.11552	0.157714	1.25134	0.323472	-1.20562	-0.269775	1.13888	0.18762	1.37306	0.457396	Forkhead box protein M1	496385	Xl.32475
C154R060	0.0055015	0.721398	0.404358	1.35634	0.439715	1.08007	0.111129	-1.05935	-0.0831855	-1.25578	-0.328585	-1.15039	-0.202126	1.00932	0.0133866	1.249	0.320774	1.15485	0.207701	-1.08153	-0.113073	Peroxisomal NADH pyrophosphatase NUDT12	67993	Mm.36507
C200R060	0.0013781	0.456314	0.0211811	1.32085	0.401465	1.01044	0.014988	-1.0519	-0.073002	-1.3072	-0.386477	-1.20316	-0.266829	-1.25372	-0.32622	1.1548	0.207638	-1.17954	-0.23823	-1.36213	-0.445868	NADH dehydrogenase [ubiquinone] 1 beta subcomplex subunit 6	4712	Hs.493668
C204R060	0.00215557	0.429582	4.57709e-06	1.40648	0.492094	1.13956	0.188475	-1.31071	-0.390349	-1.23424	-0.303618	-1.55549	-0.637371	-1.5012	-0.586115	1.18515	0.245071	-1.00507	-0.00729126	-1.19116	-0.252363	60S ribosomal protein L15
C004R061	0.00054631	0.729191	8.28089e-05	1.6189	0.69501	1.02208	0.0315082	-1.46363	-0.549546	-1.58392	-0.663502	-1.66588	-0.736286	-1.79472	-0.843762	1.42234	0.50827	-1.19973	-0.262708	-1.70643	-0.770977	Glutamine synthetase	403443	Cfa.1407
C008R061	0.000646805	0.504701	0.0939005	1.4484	0.53446	1.75746	0.813492	-1.03679	-0.0521198	1.21338	0.279032	-1.11996	-0.163444	-1.37183	-0.456104	1.34084	0.423136	1.32823	0.409508	-1.00949	-0.0136283	40S ribosomal protein SA	29236	Rn.121972; Rn.161973; Rn.999
C105R061	0.000208042	0.853802	0.14348	-1.51012	-0.594661	-1.5072	-0.591871	-1.08402	-0.116387	1.00194	0.00278974	-1.19177	-0.253105	-1.23807	-0.308094	-1.66023	-0.731379	-1.7214	-0.783579	-1.03684	-0.0521995	Tropomodulin-2	100048637; 50876	Mm.291880; Mm.457005
C107R061	0.00516938	0.880883	0.35944	1.42716	0.513144	1.49383	0.579019	-1.15985	-0.213941	1.04672	0.0658753	-1.18221	-0.241488	-1.01424	-0.0203981	1.40016	0.485597	1.7083	0.772562	1.22007	0.286965	UNKNOWN
C184R061	0.00751167	0.222751	0.500766	1.09914	0.136376	1.08619	0.119272	-1.04498	-0.0634766	-1.01193	-0.0171035	1.07575	0.105342	-1.12939	-0.175545	1.23559	0.305195	1.00501	0.00720426	-1.22943	-0.29799	Protein enabled homolog	13800	Mm.389224; Mm.87759
C197R061	0.00240412	0.287888	0.00015099	1.65947	0.730725	1.50515	0.589911	-1.24743	-0.318963	-1.10253	-0.140814	-1.63509	-0.709369	-1.72615	-0.787556	1.26604	0.340319	1.08773	0.121318	-1.16393	-0.219001	47392 smart00043, CY, Cystatin-like domain; Cystatins are a family of cysteine protease inhibitors that occur mainly as single domain proteins. However some extracellular proteins such as kininogen, His-rich glycoprotein and fetuin also contain these d...
C224R061	0.000659744	0.494497	0.00550831	-1.10819	-0.14821	-1.1503	-0.202012	1.19069	0.251803	-1.038	-0.0538017	1.08867	0.122566	1.09726	0.133905	-1.21205	-0.277447	-1.24825	-0.31991	-1.02987	-0.0424626	Clathrin light chain A	281078	Bt.1617
C252R061	0.00338505	0.484384	0.00263917	1.40217	0.487666	1.44607	0.532133	-1.17212	-0.22912	1.0313	0.0444667	-1.41842	-0.50428	-1.29606	-0.374131	1.1587	0.212506	1.30778	0.387122	1.12866	0.174616	GTP cyclohydrolase 1 feedback regulatory protein	393735	Dr.82968
C005R062	0.0031621	0.0769766	2.76589e-09	1.33632	0.418265	1.03754	0.0531635	2.27969	1.18884	-1.28797	-0.365101	3.89723	1.96245	5.453	2.44705	2.2845	1.19188	2.48178	1.31138	1.08636	0.119501	Deoxycytidine kinase	1633	Hs.709
C020R062	0.00724236	0.0643317	8.19157e-10	1.04723	0.0665726	1.20201	0.265453	1.90558	0.930228	1.14781	0.19888	3.15411	1.65723	3.11138	1.63755	1.73337	0.793579	1.96262	0.972779	1.13226	0.179201	UNKNOWN
C047R062	0.000520236	0.465304	0.114712	1.2551	0.327807	1.2034	0.267111	-1.01651	-0.0236244	-1.04297	-0.0606961	-1.12814	-0.173945	-1.06693	-0.0934633	1.13091	0.177487	1.14653	0.197272	1.01381	0.0197855	Serine incorporator 1	57515	Hs.146668
C079R062	0.00107025	0.0645528	0.172694	-1.18097	-0.239972	-1.30311	-0.381956	1.02992	0.042526	-1.10342	-0.141984	-1.5049	-0.589665	-1.01289	-0.0184808	-1.83041	-0.872163	-1.35939	-0.442963	1.34649	0.429201	Mid1-interacting protein 1	404280	Rn.8267
C105R062	0.000473536	0.0444025	1.37437e-06	1.41148	0.497213	1.26381	0.337784	-1.20286	-0.266464	-1.11684	-0.159428	-1.4031	-0.488613	-1.86305	-0.897666	1.21005	0.275063	-1.22554	-0.293418	-1.48296	-0.568481	Eukaryotic translation initiation factor 3 subunit G	8666	Hs.529059
C137R062	0.000329395	0.173974	0.00134649	1.38274	0.467526	1.54092	0.62379	-1.08038	-0.111544	1.1144	0.156264	-1.35789	-0.441365	-1.30552	-0.384627	1.10015	0.137705	1.27519	0.350707	1.1591	0.213002	60S ribosomal protein L21
C145R062	0.00374269	0.736652	0.0131112	-1.19158	-0.252874	-1.28179	-0.358162	1.26356	0.337497	-1.07571	-0.105287	1.13207	0.178964	1.22141	0.288546	-1.32998	-0.411407	-1.32603	-0.407112	1.00298	0.00429501	F-box/LRR-repeat protein 17	64839	Hs.657225
C177R062	0.00146014	0.784468	1.56602e-05	1.32161	0.402294	1.16776	0.223747	-1.30323	-0.382092	-1.13174	-0.178548	-1.37673	-0.461242	-1.45378	-0.539811	1.25106	0.323145	1.04683	0.0660283	-1.19509	-0.257117	Ezrin-radixin-moesin-binding phosphoprotein 50	59114	Rn.35142
C178R062	0.0022784	0.663287	0.100595	-1.32078	-0.401393	-1.38364	-0.468464	-1.13013	-0.176495	-1.04759	-0.0670704	-1.30979	-0.389337	-1.09071	-0.125268	-1.53075	-0.614235	-1.33537	-0.417237	1.14631	0.196999	UNKNOWN
C198R062	0.000980104	0.279164	0.0473694	1.99115	0.9936	1.51586	0.600133	-1.20492	-0.268938	-1.31355	-0.393467	-1.70862	-0.772832	-1.07769	-0.107944	1.40416	0.489706	1.69481	0.761127	1.207	0.27142	Ceruloplasmin precursor	1356	Hs.558314
C236R062	0.0046659	0.0532574	1.30679e-05	1.15379	0.206379	1.35295	0.436104	1.52067	0.604704	1.17261	0.229725	3.94381	1.97959	4.37114	2.12801	2.99232	1.58127	3.88903	1.95941	1.29967	0.378145	Interferon-induced protein 44	10561	Hs.82316
C259R062	0.00497061	0.913473	0.123688	1.23873	0.308861	1.3786	0.463205	1.13582	0.18374	1.11292	0.154344	1.08213	0.113873	1.16934	0.225694	1.18017	0.238994	1.41928	0.50516	1.20261	0.266166	Heterogeneous nuclear ribonucleoprotein U-like protein 1	232989	Mm.254223
C073R063	0.00342729	0.528998	0.000188849	-1.50236	-0.587234	-1.13735	-0.185675	1.41016	0.495858	1.32093	0.401559	1.653	0.725083	1.31588	0.396031	-1.28166	-0.358009	-1.21883	-0.285502	1.05154	0.0725066	General transcription factor II-I repeat domain-containing protein 2B	389524	Hs.647017; Hs.647027; Hs.647039
C117R063	0.000431184	0.392501	0.281906	-1.20889	-0.273677	-1.13667	-0.184818	1.14785	0.198939	1.06353	0.0888588	1.08884	0.122792	-1.05385	-0.0756737	-1.27441	-0.349824	-1.375	-0.459431	-1.07893	-0.109606	Calreticulin precursor	64202	Rn.974
C170R063	0.00323087	0.939464	0.0103926	1.26895	0.343639	1.46487	0.550775	-1.28431	-0.360994	1.15439	0.207137	-1.22093	-0.287975	-1.30842	-0.387827	1.33483	0.416657	1.43788	0.523942	1.0772	0.107285	Vimentin
C194R063	0.00869665	0.176769	0.332108	-1.02843	-0.0404421	-1.17943	-0.238087	1.06055	0.0848188	-1.14682	-0.197645	-1.17097	-0.227707	-1.06979	-0.097322	-1.27719	-0.352968	-1.33814	-0.420228	-1.04772	-0.0672597	Cysteine-rich with EGF-like domain protein 1 precursor		Bt.5333
C222R063	0.0075821	0.676172	0.0047528	1.19694	0.259355	1.05069	0.0713327	-1.28722	-0.364255	-1.1392	-0.188022	-1.21583	-0.281943	-1.11738	-0.160121	1.26722	0.341667	1.21039	0.275467	-1.04696	-0.0662	Calcium and integrin-binding protein 1	10519	Hs.135471
C250R063	0.000147245	0.95762	0.575084	-1.29938	-0.377826	-1.152	-0.204136	1.01967	0.0280996	1.12794	0.17369	1.01569	0.0224585	1.05711	0.0801195	-1.30447	-0.383467	-1.1112	-0.152116	1.17393	0.231351	Tubulin alpha-1 chain		Gga.35012
C253R063	3.64166e-05	0.278483	0.0516027	1.78065	0.832405	1.56555	0.646668	-1.07974	-0.110691	-1.1374	-0.185736	-1.41581	-0.50163	-1.10955	-0.149975	1.35798	0.441465	1.52349	0.607384	1.12188	0.165919	Ictacalcin
C017R064	0.00628486	0.0300928	0.271782	-1.38389	-0.468727	1.19361	0.255335	-1.31323	-0.393125	1.65183	0.724063	1.39235	0.477519	1.38874	0.473781	1.32126	0.401916	2.17685	1.12224	1.64755	0.720325	Homeobox protein Hox-A2b	30325	Dr.82597
C032R064	0.00318625	0.467027	0.858892	1.46891	0.554748	1.08243	0.114277	-1.15603	-0.209181	-1.35705	-0.440471	-1.11564	-0.15787	1.21753	0.283956	1.5221	0.60606	1.52353	0.607415	1.00094	0.00135469	UNKNOWN
C034R064	0.00710458	0.158278	0.0593605	-1.02652	-0.0377584	1.27077	0.3457	1.09564	0.13178	1.30447	0.383459	1.19658	0.258912	-1.03112	-0.044219	1.06391	0.0893736	1.12483	0.169702	1.05726	0.0803281	UNKNOWN
C036R064	0.00120958	0.438074	0.000717607	1.59355	0.672241	1.768	0.822121	1.69085	0.757751	1.10948	0.14988	1.28317	0.359708	1.53685	0.619975	1.20932	0.274198	1.60697	0.684345	1.32882	0.410147	Coiled-coil domain-containing protein 77	446402	Xl.7566
C045R064	0.00462135	0.0588712	0.000108373	1.63732	0.711337	1.37647	0.460972	-1.13407	-0.181505	-1.18951	-0.250365	-1.68667	-0.754179	-1.55667	-0.638465	1.10088	0.138663	1.00278	0.00401193	-1.09783	-0.134651	Cytochrome b5	414799	Ssc.12198
C046R064	0.00615075	0.0380214	0.979697	1.19466	0.256597	1.44751	0.533573	1.19342	0.2551	1.21165	0.276976	-1.13464	-0.182232	-1.05643	-0.0791961	-1.13346	-0.180734	1.14812	0.199277	1.30135	0.380011	Lysosomal acid lipase/cholesteryl ester hydrolase precursor	3988	Hs.643030
C052R064	0.00843889	0.681569	0.0021634	-1.25532	-0.32806	-1.07143	-0.0995432	1.14247	0.192151	1.17163	0.228516	1.23472	0.304182	1.29639	0.374503	-1.16153	-0.216029	1.05908	0.0828081	1.23015	0.298837	Ras GTPase-activating protein-binding protein 2
C112R064	0.000413874	0.203187	0.0164289	1.53753	0.620616	1.54481	0.627426	-1.18236	-0.241664	1.00473	0.00681061	-1.06757	-0.0943369	-1.7724	-0.825705	1.70284	0.767943	1.03053	0.043385	-1.65239	-0.724557	Cytochrome b reductase 1	445864	Xl.6189
C118R064	0.00252443	0.825392	0.0626569	1.20389	0.267705	1.38675	0.47171	-1.08551	-0.118371	1.15189	0.204005	-1.09859	-0.135649	-1.19716	-0.259621	1.18956	0.250427	1.25741	0.330459	1.05704	0.0800324	mRNA turnover protein 4 homolog	51154	Hs.463797
C151R064	0.000764779	0.0617586	0.0218291	1.65598	0.727684	1.41998	0.505867	-1.00783	-0.01125	-1.1662	-0.221817	-1.4708	-0.556602	-1.1732	-0.230447	1.13472	0.182331	1.21982	0.28667	1.075	0.104339	Ribosome biogenesis protein NSA2 homolog	10412	Hs.482526
C186R064	3.11954e-06	0.531213	0.219844	1.48968	0.575003	1.18657	0.2468	-1.01019	-0.0146269	-1.25545	-0.328203	1.07952	0.110385	1.21478	0.280701	1.62452	0.700015	1.45612	0.542128	-1.11565	-0.157887	Claudin-6	9074	Hs.533779
C001R065	0.00225624	0.0423488	0.0521294	1.08821	0.121961	1.0263	0.037452	-1.30078	-0.379379	-1.06033	-0.0845088	1.08579	0.118743	-1.26388	-0.337857	1.53696	0.620082	1.05627	0.0789739	-1.45509	-0.541108	60S ribosomal export protein NMD3	541444	Dr.79205
C070R065	0.00677022	0.0150751	6.39588e-06	1.39781	0.483173	1.22861	0.297022	-1.17497	-0.232628	-1.13772	-0.18615	-1.62811	-0.703201	-1.2608	-0.334342	1.00877	0.0126004	1.14497	0.195309	1.13501	0.182709	60S ribosomal protein L10a	323305	Dr.26808
C078R065	0.000925386	0.38488	7.10325e-05	1.32195	0.402662	1.66807	0.738177	-1.57705	-0.657233	1.26183	0.335515	-1.95161	-0.964664	-1.37345	-0.457804	1.06824	0.0952312	1.91535	0.937606	1.793	0.842375	Adenosine deaminase	436919	Dr.120392; Dr.88169
C112R065	0.00411446	0.302077	0.174236	-1.08832	-0.122108	-1.11092	-0.151756	1.03031	0.0430727	-1.02076	-0.0296473	-1.10573	-0.144997	-1.13658	-0.184703	-1.23986	-0.310178	-1.30092	-0.379531	-1.04925	-0.069353	Peptidyl-prolyl cis-trans isomerase, mitochondrial precursor	105675	Mm.41656
C113R065	0.000497577	0.90478	0.260333	1.48954	0.57487	1.48339	0.568901	-1.10752	-0.147327	-1.00415	-0.00596864	-1.17285	-0.230014	-1.05885	-0.0824962	1.40657	0.492182	1.55157	0.633732	1.10309	0.14155	Uncharacterized protein LOC399947 homolog precursor	780237	Str.53963
C129R065	0.00048919	0.0296066	0.594601	-1.43199	-0.518018	-1.00703	-0.010101	1.15179	0.203878	1.422	0.507917	1.27358	0.348895	-1.31142	-0.391128	-1.29504	-0.373001	-1.52109	-0.605107	-1.17455	-0.232105	Steroid hormone receptor ERR2	299210	Hs.435845; Rn.104984
C143R065	0.000499681	0.13305	8.20523e-07	1.21027	0.275329	1.22495	0.292728	1.42086	0.506769	1.01213	0.0173983	2.0094	1.00677	1.65528	0.727073	1.71158	0.775327	1.42705	0.513031	-1.19939	-0.262296	UNKNOWN
C162R065	0.000935559	0.127945	2.42631e-05	1.45187	0.537908	1.25187	0.324088	-1.25209	-0.32434	-1.15975	-0.213819	-1.59806	-0.676318	-1.26466	-0.338755	1.13755	0.18593	1.23943	0.309674	1.08956	0.123744	Epididymal secretory protein E1 precursor	282673; 799702	Dr.118973; Dr.4376
C180R065	0.00997402	0.709017	0.0670959	1.44781	0.533867	1.68922	0.756361	1.33841	0.420518	1.16675	0.222493	1.11725	0.159947	1.44172	0.52779	1.20857	0.273296	1.81961	0.863633	1.5056	0.590337	Protein-tyrosine sulfotransferase 2	540183	Bt.65031
C185R065	0.0083059	0.214731	0.00408808	-1.01837	-0.0262598	-1.09678	-0.133277	-1.06403	-0.0895357	-1.077	-0.107017	-1.09174	-0.126633	-1.30984	-0.389392	-1.04489	-0.0633567	-1.35016	-0.433133	-1.29215	-0.369776	Ras-related protein Rab-7a	29448	Rn.1425
C225R065	0.000451859	0.29032	0.01013	-1.33441	-0.416198	-1.27075	-0.345685	1.06325	0.0884801	1.05009	0.070513	1.11847	0.161521	1.35834	0.441843	-1.26853	-0.343157	1.00534	0.00767763	1.2753	0.350835	UNKNOWN
C229R065	6.19202e-05	0.250349	0.742556	-1.30904	-0.388509	-1.29693	-0.375104	1.19861	0.261359	1.00934	0.0134057	-1.0947	-0.130533	-1.01079	-0.015484	-1.71761	-0.780402	-1.57129	-0.651947	1.09312	0.128455	Squalene synthetase	2222	Hs.593928
C026R066	2.11468e-06	0.365996	0.199282	-1.18493	-0.244805	-1.22419	-0.291824	1.02098	0.029953	-1.03313	-0.0470193	-1.06024	-0.0843849	-1.11872	-0.161853	-1.28266	-0.359143	-1.39826	-0.48363	-1.09012	-0.124487	Proteasome subunit alpha type-6	29673	Rn.107278
C063R066	0.000969158	0.330831	0.253667	1.13517	0.182912	1.26579	0.340037	1.01707	0.0244247	1.11506	0.157125	-1.0222	-0.0316804	1.24007	0.310423	1.09187	0.126807	1.54332	0.626036	1.41346	0.499229	UNKNOWN
C105R066	1.40081e-05	0.231176	0.710366	-1.45061	-0.536659	-1.44696	-0.533028	1.01643	0.023516	1.00252	0.00363132	1.18488	0.244735	-1.11971	-0.163127	-1.24439	-0.31544	-1.64681	-0.719671	-1.32338	-0.404231	Ras-related protein Rab-11B
C130R066	0.0056142	0.843066	0.115282	1.26778	0.342305	1.41917	0.50505	1.09822	0.135173	1.11941	0.162745	1.23172	0.300673	1.21228	0.277721	1.42189	0.507805	1.56656	0.647597	1.10175	0.139792	17-beta-hydroxysteroid dehydrogenase 14	282652	Bt.88264
C185R066	0.000536985	0.145733	0.000319021	-1.4303	-0.516313	-1.39909	-0.484489	1.20555	0.269693	1.0223	0.0318238	1.2191	0.285815	1.79465	0.843699	-1.4144	-0.500191	1.06401	0.0895165	1.50494	0.589708	Uncharacterized protein KIAA0232		Hs.79276
C220R066	0.00806703	0.94108	0.10381	1.19202	0.253411	-1.03637	-0.0515372	-1.12018	-0.163726	-1.23537	-0.304948	-1.08508	-0.117804	-1.14882	-0.20015	1.23057	0.299332	-1.06287	-0.0879611	-1.30794	-0.387293	Sarcolemmal membrane-associated protein	7871	Hs.476432
C247R066	0.00177343	0.600803	0.0500344	1.43518	0.521233	2.92676	1.54931	-1.12964	-0.175862	2.0393	1.02807	-1.48595	-0.571389	-1.66381	-0.734492	1.09104	0.125706	1.98711	0.990675	1.8213	0.864969	Ig kappa chain V-IV region B17 precursor
C036R067	0.00487954	0.375437	0.00157255	1.36896	0.453083	1.3103	0.3899	-1.11649	-0.158973	-1.04477	-0.0631828	-1.29709	-0.375282	-1.39125	-0.476381	1.17835	0.236774	1.05153	0.0724923	-1.12061	-0.164282	UNKNOWN
C058R067	0.00251548	0.951232	0.00768481	1.3432	0.425679	1.17653	0.234542	-1.24803	-0.319647	-1.14166	-0.191136	-1.27113	-0.346115	-1.1945	-0.25641	1.31879	0.399211	1.22925	0.297779	-1.07284	-0.101431	Transcription initiation factor TFIID subunit 10	6881	Hs.5158
C070R067	0.00113894	0.10994	9.68304e-10	1.24219	0.31288	1.46722	0.55309	2.54383	1.347	1.18116	0.24021	4.64362	2.21525	4.95413	2.30863	2.26754	1.18113	2.85743	1.51472	1.26015	0.333591	UNKNOWN
C079R067	4.18181e-07	0.40181	0.0325715	-2.00208	-1.0015	-2.56565	-1.35932	1.16617	0.22178	-1.28149	-0.357821	1.10582	0.145117	1.63841	0.7123	-2.11135	-1.07816	-1.82615	-0.868802	1.15618	0.209362	Histone H3	318847; 3771723; 3771729; 3771771; 3771792; 3771959; 3772032; 3772149; 3772163; 3772173; 3772189; 3772191; 3772198; 3772231; 3772370; 3772374; 3772421; 3772489; 3772517; 3772518; 3772552; 3772607; 3772619	Dm.29515; Dm.34559; Dm.34566; Dm.34567
C095R067	0.007585	0.270802	0.0201761	1.48605	0.571483	1.359	0.442549	-1.05918	-0.0829449	-1.09349	-0.128934	-1.38271	-0.467497	-1.23452	-0.303945	1.13834	0.18693	1.16598	0.221549	1.02429	0.034619	Nucleotide-binding protein 1	26425	Mm.29037; Mm.325732
C115R067	0.00107391	0.573002	3.357e-06	1.71443	0.777726	1.47503	0.560746	-2.49665	-1.32	-1.1623	-0.21698	-1.9757	-0.982366	-2.97002	-1.57047	2.16649	1.11536	1.23994	0.310271	-1.74725	-0.805086	Ependymin-2 precursor
C123R067	0.000483236	0.741771	0.0330516	1.41089	0.496601	1.4439	0.529968	-1.14119	-0.190541	1.0234	0.0333666	-1.27425	-0.349643	-1.14414	-0.194263	1.26356	0.337499	1.44018	0.526246	1.13977	0.188747	GTP cyclohydrolase 1 feedback regulatory protein	393735	Dr.82968
C131R067	0.00911302	0.481032	0.837271	-1.25169	-0.323878	1.08003	0.111072	1.05976	0.083731	1.35186	0.43495	1.10094	0.13874	-1.12015	-0.163695	-1.20486	-0.268869	-1.09912	-0.136354	1.0962	0.132515	IQ calmodulin-binding motif-containing protein 1	320299	Mm.222934
C255R067	5.65775e-05	0.760083	0.0449803	1.58915	0.668256	1.83046	0.872208	-1.12892	-0.174943	1.15185	0.203952	-1.18056	-0.239467	-1.35868	-0.442201	1.51964	0.603733	1.52093	0.604951	1.00084	0.00121805	GTP-binding nuclear protein Ran
C014R068	0.00342308	0.622981	0.00563237	-1.32185	-0.40256	-1.19019	-0.251194	1.11106	0.151931	1.11062	0.151366	1.2332	0.302409	1.2561	0.32895	-1.19092	-0.252082	-1.05276	-0.074175	1.13124	0.177907	Nck-associated protein 1	58823	Rn.2611
C053R068	0.00247011	0.664718	0.720884	-1.17676	-0.234824	-1.37963	-0.46428	1.04489	0.0633482	-1.17239	-0.229456	-1.10652	-0.146028	-1.02891	-0.0411165	-1.36056	-0.444201	-1.48323	-0.568745	-1.09016	-0.124544	UNKNOWN
C106R068	1.17291e-06	0.842038	0.339434	-1.90467	-0.929542	-1.61991	-0.695912	-1.11574	-0.157995	1.17579	0.233631	-1.18335	-0.242875	-1.01412	-0.0202292	-2.02009	-1.01442	-1.47238	-0.558146	1.372	0.456277	Diphosphomevalonate decarboxylase	492781	Dr.90184
C139R068	0.00183338	0.358941	0.235891	-1.3955	-0.480784	-1.15293	-0.205308	1.30269	0.381493	1.21039	0.275477	1.21266	0.278178	-1.11099	-0.151847	-1.4991	-0.584099	-1.66861	-0.738648	-1.11307	-0.154549	UNKNOWN
C165R068	3.89168e-05	0.267534	0.0755264	-1.47104	-0.556833	-1.78582	-0.836583	-1.31149	-0.391203	-1.21398	-0.27975	-1.19924	-0.262117	1.05041	0.0709503	-1.34513	-0.427747	-1.29633	-0.374429	1.03765	0.0533179	UNKNOWN
C228R068	0.000291011	0.750562	0.616033	1.59341	0.672115	1.35968	0.443271	-1.03738	-0.0529498	-1.1719	-0.228845	-1.14592	-0.196509	1.03417	0.0484702	1.44248	0.528556	1.45871	0.544691	1.01125	0.0161347	Peroxiredoxin-5, mitochondrial precursor	25824	Hs.502823
C246R068	2.72205e-05	0.123027	1.05803e-05	-1.62961	-0.704523	-1.26578	-0.34003	1.21179	0.277142	1.28743	0.364493	1.58664	0.665977	1.42863	0.51463	-1.2446	-0.315687	-1.07366	-0.102542	1.15921	0.213146	Staphylococcal nuclease domain-containing protein 1	64635	Rn.36148
C265R068	0.00384415	0.0282182	0.670948	1.51912	0.60324	1.3596	0.443188	1.18959	0.250463	-1.11733	-0.160052	-1.24212	-0.312803	1.14546	0.195927	1.0281	0.0399738	1.30917	0.388652	1.27339	0.348678	Beta-soluble NSF attachment protein	63908	Hs.269471
C103R069	4.96644e-06	0.0861882	0.611543	-1.25568	-0.328473	-1.38263	-0.467415	1.18239	0.241705	-1.1011	-0.138941	-1.01565	-0.0224085	-1.30019	-0.378721	-1.50795	-0.592587	-2.12556	-1.08784	-1.40957	-0.495254	Cyclin-dependent kinase 2-associated protein 1	8099	Hs.433201
C106R069	5.47005e-05	0.198162	0.0397619	1.43132	0.517346	1.46842	0.554268	1.01336	0.01915	1.02592	0.036922	-1.15077	-0.202594	-1.2645	-0.338565	1.2274	0.295603	1.14596	0.196553	-1.07107	-0.0990496	Neuroendocrine protein 7B2 precursor	6447	Hs.156540
C114R069	0.00184845	0.52781	4.23597e-05	1.35831	0.441807	1.03916	0.055414	-1.25378	-0.32628	-1.30712	-0.386394	-1.45001	-0.536065	-1.39931	-0.484716	1.17448	0.232023	-1.07402	-0.103022	-1.26142	-0.335044	ATP synthase subunit gamma, mitochondrial precursor	327668	Bt.20727
C129R069	0.00622153	0.467312	0.18963	-1.51947	-0.603567	-1.18033	-0.239187	-1.01666	-0.0238361	1.28733	0.364379	1.2203	0.28724	1.20221	0.265694	-1.22475	-0.292491	1.03551	0.050343	1.26825	0.342834	Transposable element Tcb1 transposase
C179R069	0.00602654	0.943808	0.00286973	-1.18399	-0.243656	-1.0469	-0.0661172	1.17909	0.237668	1.13095	0.177539	1.16021	0.214383	1.21563	0.281707	-1.20325	-0.266941	-1.01542	-0.022079	1.18498	0.244863	Nucleolar transcription factor 1		Mm.2845
C189R069	0.00139916	0.231417	0.00192865	1.40206	0.487551	1.18749	0.247919	-1.28524	-0.362038	-1.18069	-0.239632	-1.17693	-0.235029	-1.88105	-0.91154	1.53109	0.61456	-1.2325	-0.301584	-1.88706	-0.916143	Lysyl-tRNA synthetase
C198R069	0.00744616	0.109938	0.291333	1.26784	0.342371	1.0906	0.12512	1.10525	0.144372	-1.16252	-0.217251	-1.05865	-0.0822302	-1.26812	-0.342692	1.08355	0.115768	-1.28516	-0.361945	-1.39253	-0.477713	Putative all-trans-retinol 13,14-reductase precursor	325922	Dr.80063
C208R069	0.00591121	0.707684	0.0508828	1.2838	0.360416	1.07103	0.0989966	1.1281	0.17389	-1.19866	-0.26142	1.06519	0.0911115	1.22053	0.287513	1.21221	0.277638	1.15879	0.21262	-1.0461	-0.0650185	UNKNOWN
C230R069	9.51717e-06	0.894421	0.080683	1.80445	0.851559	1.39614	0.48144	-1.26476	-0.338861	-1.29246	-0.370119	-1.14483	-0.195139	-1.23523	-0.30478	1.99347	0.995281	1.42951	0.515521	-1.39451	-0.47976	EMILIN-2 precursor	246707	Mm.23462
C257R069	4.01664e-05	0.953303	0.704805	1.1914	0.252654	1.26964	0.344414	1.00422	0.00607532	1.06567	0.0917597	1.00662	0.00952378	1.03697	0.0523785	1.19425	0.256103	1.31105	0.390717	1.0978	0.134614	Sequestosome-1	18412	Mm.458013
C018R070	8.6825e-05	0.256421	5.97225e-06	-1.03021	-0.0429369	1.21772	0.284183	1.14367	0.193677	1.25451	0.32712	1.29396	0.37179	1.29087	0.368345	1.09823	0.135177	1.37445	0.458851	1.25151	0.323674	DNA-repair protein XRCC4	7518	Hs.567359
C034R070	0.00209332	0.731824	0.218467	-1.14242	-0.192092	1.1015	0.139468	-1.01888	-0.026986	1.25837	0.33156	-1.03802	-0.053837	-1.11709	-0.159751	-1.16388	-0.218943	1.00466	0.00670338	1.1693	0.225646	Leucine-rich repeat neuronal protein 1 precursor	539619	Bt.17579
C146R070	0.00352618	0.832374	0.00184931	1.38166	0.466405	1.56762	0.648575	1.45569	0.541708	1.13459	0.182171	1.58412	0.663685	1.33842	0.420535	1.50356	0.588382	1.44133	0.527403	-1.04317	-0.0609786	Tumor necrosis factor receptor superfamily member 1A precursor	21937	Mm.1258; Mm.466360
C161R070	0.00656664	0.736401	0.000503182	1.32117	0.401812	1.01763	0.0252067	-1.26707	-0.341496	-1.29828	-0.376606	-1.40266	-0.488168	-1.26888	-0.343554	1.19345	0.25514	1.01618	0.0231492	-1.17445	-0.231991	Tubulin polyglutamylase complex subunit 1	91978	Hs.369613
C175R070	1.25954e-05	0.0813995	1.91676e-05	2.43076	1.2814	1.73604	0.795801	-1.54223	-0.62502	-1.40017	-0.485604	-2.51659	-1.33147	-1.49274	-0.577959	1.48963	0.574953	1.7936	0.842862	1.20406	0.267908	Ependymin precursor
C220R070	0.000231626	0.349566	0.0153679	1.23228	0.301332	1.00255	0.0036778	-1.29893	-0.377328	-1.22914	-0.297654	-1.06498	-0.0908279	-1.21872	-0.285371	1.50299	0.587832	1.06854	0.0956347	-1.40659	-0.492197	Dehydrogenase/reductase SDR family member 1	52585	Mm.21623
C236R070	0.000241126	0.330982	0.0214703	1.28712	0.364152	1.51846	0.602608	1.05177	0.0728189	1.17973	0.238456	1.34682	0.429559	1.54323	0.625954	1.6482	0.720892	2.22799	1.15574	1.35177	0.434851	Beta-2-microglobulin precursor
C092R071	0.00304353	0.265364	0.0267323	1.27905	0.355074	1.35939	0.442964	-1.01683	-0.0240751	1.06281	0.0878899	-1.12048	-0.164119	-1.29389	-0.371713	1.16073	0.21503	1.06831	0.0953259	-1.08651	-0.119704	Signal recognition particle receptor subunit alpha	6734	Hs.591936
C096R071	0.000244707	0.580893	0.000460316	1.45667	0.542673	1.20954	0.274456	-1.66159	-0.732563	-1.20432	-0.268217	-1.43196	-0.517995	-1.30545	-0.38455	1.69026	0.757241	1.53951	0.622469	-1.09792	-0.134772	Alpha-2-macroglobulin precursor
C179R071	0.000434978	0.544997	0.00565043	1.27517	0.350689	1.14141	0.190816	-1.35354	-0.436738	-1.11719	-0.159873	-1.16048	-0.214724	-1.19918	-0.26205	1.48731	0.572704	1.28833	0.365504	-1.15444	-0.207199	Protein BCCIP homolog	541348	Dr.105218
C180R071	0.00085085	0.297315	0.136239	1.10709	0.146776	1.25423	0.326807	-1.07135	-0.0994308	1.13291	0.180031	1.02096	0.0299214	-1.15029	-0.201995	1.21094	0.276128	1.16816	0.224243	-1.03662	-0.0518847	Prohibitin	5245	Hs.514303
C181R071	0.00180058	0.649916	0.631392	1.1554	0.208391	1.37166	0.455921	-1.02829	-0.0402448	1.18717	0.247531	1.04222	0.0596623	-1.10514	-0.144227	1.23825	0.308298	1.27628	0.35194	1.03071	0.0436417	RAF proto-oncogene serine/threonine-protein kinase	396245	Gga.42842
C190R071	0.00938967	0.677018	0.00634721	1.31872	0.399144	1.0353	0.0500454	-1.15765	-0.211193	-1.27376	-0.349098	-1.27073	-0.34566	-1.38685	-0.471815	1.20137	0.264676	-1.15715	-0.210576	-1.39016	-0.475253	Ubiquitin-conjugating enzyme E2 E1	7324	Hs.164853
C220R071	3.45588e-06	0.387919	0.0049341	1.48216	0.567703	1.07427	0.103355	-1.42391	-0.509855	-1.37969	-0.464348	-1.23667	-0.306458	-1.10652	-0.146031	1.70657	0.771099	1.3824	0.467179	-1.23449	-0.30392	118755 pfam10231, DUF2315, Uncharacterised conserved protein (DUF2315). This is a family of small conserved proteins found from worms to humans. The function is not known.
C099R072	0.00724527	0.0123704	1.23498e-05	1.49008	0.575386	1.49903	0.584031	-1.08031	-0.111441	1.00601	0.00864479	-1.56318	-0.644486	-1.65831	-0.729711	1.02978	0.0423416	-1.02402	-0.0342389	-1.05452	-0.0765805	Protein phosphatase 1 regulatory subunit 3C	393807	Dr.82649
C120R072	0.00316794	0.0397643	0.255704	-1.10345	-0.142025	-1.10051	-0.138172	1.06135	0.0858965	1.00267	0.00385337	-1.43877	-0.524841	1.01754	0.0250913	-1.68502	-0.752762	-1.14788	-0.198977	1.46793	0.553785	Follistatin-related protein 1 precursor	534482	Bt.89210
C154R072	0.000294095	0.0665355	8.3243e-05	1.38932	0.474382	1.13763	0.186036	-1.09231	-0.12738	-1.22124	-0.288346	-1.37145	-0.455701	-1.26676	-0.341147	1.10654	0.146061	-1.01941	-0.0277319	-1.12802	-0.173793	Protein MGR2 homolog	140823	Hs.472564
C205R072	0.00121057	0.218482	0.017722	1.53278	0.616153	-1.03351	-0.0475554	-1.02242	-0.0319864	-1.58415	-0.663708	-1.34678	-0.429515	-1.62737	-0.702545	1.16362	0.218624	-1.64503	-0.718114	-1.91419	-0.936738	Cytosolic sulfotransferase 2	368269	Dr.81642
C223R072	0.00292113	0.0835664	0.0001197	1.55649	0.638293	1.25549	0.328253	-1.28112	-0.357404	-1.23974	-0.310041	-1.76847	-0.822502	-1.23455	-0.303986	1.12755	0.173195	1.30285	0.381671	1.15547	0.208475	CD9 antigen	24936	Rn.2091
C242R072	0.00827091	0.249121	0.0601524	1.10672	0.146288	-1.08406	-0.116447	-1.31491	-0.39496	-1.19975	-0.262734	-1.02828	-0.0402284	-1.12811	-0.173905	1.41521	0.501019	1.0752	0.104608	-1.31623	-0.396411	Ribosome maturation protein SBDS	448365	Str.16646
C008R073	0.00596621	0.182702	0.471343	1.69805	0.763879	1.24383	0.314793	1.08867	0.122566	-1.36518	-0.449086	-1.21605	-0.282202	1.44286	0.528934	1.28264	0.359112	1.64851	0.721161	1.28525	0.36205	UNKNOWN
C023R073	0.00231757	0.140345	0.483101	-1.12913	-0.175217	1.16401	0.219106	1.10029	0.13789	1.31433	0.394323	-1.02773	-0.0394648	-1.19591	-0.258103	-1.27683	-0.352572	-1.13044	-0.176886	1.1295	0.175685	Protein FAM5C precursor	339479	Hs.65765
C053R073	0.00908482	0.216636	0.0182662	-1.14515	-0.195541	-1.1985	-0.261224	1.06399	0.0894897	-1.04658	-0.0656826	1.03391	0.0481106	1.27328	0.34855	-1.17847	-0.23692	-1.0015	-0.00216361	1.17671	0.234757	26S proteasome non-ATPase regulatory subunit 11	5717	Hs.655396
C093R073	0.00176323	0.341939	0.407425	-1.3652	-0.449117	-1.35703	-0.440457	1.2176	0.284042	1.00602	0.00865942	1.24565	0.316902	-1.17425	-0.231744	-1.33446	-0.416257	-1.94025	-0.956244	-1.45396	-0.539986	Calcium/calmodulin-dependent protein kinase type IV	814	Hs.591269
C183R073	1.8213e-05	0.846219	0.568494	1.43382	0.519859	2.40879	1.26831	-1.01095	-0.0157132	1.67998	0.748448	1.04922	0.0693158	1.20983	0.274805	1.52086	0.604888	2.94614	1.55882	1.93715	0.953936	H-2 class II histocompatibility antigen gamma chain		Rn.33804
C193R073	5.70715e-10	0.112452	0.0111875	1.46212	0.548058	1.72663	0.787962	-1.01936	-0.0276675	1.18091	0.239905	-1.06581	-0.0919473	-1.29137	-0.368906	1.3984	0.483778	1.36294	0.446724	-1.02602	-0.0370543	Ganglioside GM2 activator precursor	14667	Mm.287807
C224R073	0.00209295	0.206122	3.75038e-07	1.1627	0.217483	1.06796	0.094854	1.361	0.444663	-1.08872	-0.122629	1.74815	0.805832	1.6636	0.734308	1.49345	0.578652	1.30541	0.384499	-1.14405	-0.194153	Suppressor of G2 allele of SKP1 homolog	67955	Mm.18972
C239R073	0.00834245	0.428009	0.0246717	1.54973	0.632014	1.47584	0.561532	-1.07054	-0.0983379	-1.05007	-0.0704815	-1.29638	-0.374492	-1.48723	-0.572625	1.27975	0.355859	1.06234	0.0872453	-1.20465	-0.268614	118755 pfam10231, DUF2315, Uncharacterised conserved protein (DUF2315). This is a family of small conserved proteins found from worms to humans. The function is not known.
C241R073	0.00666343	0.831681	0.108491	1.17	0.226507	-1.08126	-0.112713	-1.1381	-0.186628	-1.26507	-0.33922	-1.11341	-0.154983	-1.04074	-0.057607	1.19595	0.258151	1.01137	0.0163075	-1.1825	-0.241844	Dynein light chain roadblock-type 2	768062	Bt.18339
C253R073	0.000673946	0.0742499	0.210965	-1.10664	-0.146181	-1.11546	-0.157635	1.07011	0.0977541	-1.00797	-0.0114541	-1.07293	-0.101556	1.1647	0.219952	-1.27058	-0.345491	-1.02487	-0.0354367	1.23975	0.310054	Cytochrome b-c1 complex subunit 2, mitochondrial precursor	7385	Hs.592048
C254R073	0.000789532	0.308948	0.384828	1.65157	0.723837	1.83781	0.877989	-1.06923	-0.096574	1.11277	0.154152	-1.44848	-0.534536	1.10502	0.144079	1.21915	0.285875	2.17142	1.11864	1.7811	0.832767	Allograft inflammatory factor 1	29427	Rn.32080
C262R073	0.00312553	0.210988	0.905163	1.32214	0.40287	1.36732	0.451353	1.15077	0.202599	1.03418	0.0484833	1.01945	0.0277849	-1.14828	-0.199469	1.17125	0.228055	1.03475	0.049285	-1.13192	-0.17877	Cell cycle progression protein 1	427496	Gga.3364
C001R074	2.5627e-05	0.960916	0.622104	-1.53948	-0.622439	-1.52105	-0.605064	-1.06839	-0.0954328	1.01212	0.0173747	-1.0243	-0.0346358	-1.0276	-0.0392722	-1.47595	-0.561642	-1.46297	-0.548903	1.00887	0.0127383	Lathosterol oxidase	6309	Hs.287749
C007R074	0.00401488	0.784835	0.00590353	-1.16307	-0.217932	1.12927	0.175385	1.23981	0.310115	1.31341	0.393317	1.16903	0.225314	1.33669	0.41867	-1.23348	-0.302734	1.21751	0.283939	1.50178	0.586673	UNKNOWN
C010R074	0.00953103	0.496856	0.000146822	1.35285	0.435998	1.14231	0.191957	-1.22287	-0.290267	-1.1843	-0.24404	-1.41522	-0.501029	-1.46588	-0.551768	1.16897	0.225235	-1.04938	-0.0695437	-1.2267	-0.294779	26S proteasome non-ATPase regulatory subunit 9	161475	Rn.24127
C072R074	0.000868482	0.320242	0.0145335	-1.23502	-0.304532	-1.12886	-0.174861	-1.04472	-0.0631135	1.09404	0.129672	-1.23915	-0.309351	-1.35363	-0.436835	-1.46487	-0.55077	-1.46265	-0.548583	1.00152	0.00218719	High mobility group protein B2	3148	Hs.434953
C075R074	0.000281163	0.501109	0.0150166	1.37416	0.458546	1.70841	0.772651	1.23678	0.306588	1.24324	0.314105	1.1666	0.222313	1.64904	0.721625	1.29618	0.37427	2.27787	1.18769	1.75737	0.813418	Beta-2-microglobulin precursor
C098R074	0.0032977	0.0452981	2.24147e-09	1.20072	0.263894	1.18245	0.241778	2.33827	1.22544	-1.01545	-0.0221159	4.69971	2.23257	6.32388	2.66081	2.41332	1.27102	3.19794	1.67714	1.32512	0.406124	Interferon-induced 35 kDa protein homolog	70110	Mm.45558
C107R074	0.00768557	0.273704	0.0469887	1.25303	0.325423	1.10096	0.138766	1.00264	0.00380898	-1.13812	-0.186656	-1.13971	-0.188667	-1.20012	-0.263182	1.09653	0.132947	-1.09295	-0.128224	-1.19845	-0.261171	Uncharacterized protein C11orf73 homolog	446847	Xl.6804
C123R074	0.000185013	0.13291	6.32169e-09	1.55156	0.633717	1.75612	0.812391	2.74753	1.45814	1.13184	0.178674	4.90945	2.29556	6.94762	2.79652	2.77241	1.47114	4.44065	2.15077	1.60173	0.67963	UNKNOWN
C188R074	7.41257e-05	0.597864	0.367896	1.54841	0.630788	1.16885	0.225091	1.10014	0.137685	-1.32473	-0.405697	1.24293	0.313749	-1.04234	-0.0598214	1.74939	0.806851	1.0193	0.0275844	-1.71626	-0.779267	57920 cd03600, CLECT_thrombomodulin_like, CLECT_thrombomodulin_like: C-type lectin-like domain (CTLD) of the type found in human thrombomodulin(TM), Endosialin, C14orf27, and C1qR. CTLD refers to a domain homologous to the carbohydrate-recognition dom...
C208R074	0.00227777	0.926832	0.019285	1.45972	0.545688	1.11077	0.151555	-1.25828	-0.331453	-1.31415	-0.394133	-1.23913	-0.309324	-1.37444	-0.458843	1.48228	0.567817	1.01689	0.024165	-1.45766	-0.543652	UNKNOWN
C224R074	0.00171647	0.699717	0.000148132	1.39741	0.482757	1.09251	0.12764	-1.35737	-0.44081	-1.27909	-0.355117	-1.48415	-0.569636	-1.27923	-0.355279	1.27804	0.35393	1.15923	0.213171	-1.10249	-0.140759	Elongation factor 1-beta	399326	Xl.41761
C227R074	0.00225846	0.555393	0.00806093	-1.39181	-0.476965	-1.48599	-0.571424	1.19866	0.26142	-1.06767	-0.0944592	1.18293	0.242367	1.51141	0.595897	-1.41032	-0.496019	-1.1785	-0.236948	1.19671	0.259071	Tumor protein p53-inducible nuclear protein 2	58476	Hs.516994
C041R075	0.00629346	0.0831444	0.00195354	-1.26996	-0.344782	-1.05058	-0.0711906	1.02479	0.0353268	1.20881	0.273592	1.26195	0.335656	1.2664	0.340734	-1.03129	-0.0444525	1.17627	0.234217	1.21308	0.27867	73156 cd01650, RT_nLTR_like, RT_nLTR: Non-LTR (long terminal repeat) retrotransposon and non-LTR retrovirus reverse transcriptase (RT). This subfamily contains both non-LTR retrotransposons and non-LTR retrovirus RTs. RTs catalyze the conversion of sin...
C043R075	0.00995362	0.288074	0.487488	-1.08922	-0.123302	-1.1644	-0.219585	1.09301	0.128307	-1.06902	-0.0962834	-1.13108	-0.177706	-1.11968	-0.163083	-1.34659	-0.429314	-1.42501	-0.510976	-1.05824	-0.0816612	39S ribosomal protein L17, mitochondrial precursor	27397	Mm.44225
C054R075	0.000212405	0.213206	0.953543	1.58251	0.662211	1.11	0.150563	-1.01228	-0.0176117	-1.42568	-0.511648	-1.19801	-0.260639	1.1962	0.258463	1.33717	0.419184	1.3441	0.426638	1.00518	0.00745399	UNKNOWN
C070R075	0.00533824	0.163543	2.03002e-11	1.12536	0.170382	1.15524	0.208195	1.97838	0.984318	1.02656	0.0378134	2.55519	1.35343	2.93684	1.55427	1.45346	0.539493	1.71492	0.778143	1.17989	0.23865	Protein deltex-3-like	151636	Hs.518201
C089R075	0.00102224	0.234326	0.0992386	-1.34229	-0.424699	-1.00068	-0.000980213	1.18223	0.241511	1.34138	0.423719	1.24921	0.32102	-1.0689	-0.0961224	-1.27032	-0.34519	-1.26454	-0.338613	1.00457	0.00657681	Ran-binding protein 3	8498	Hs.531752
C096R075	7.7829e-05	0.832917	0.00507179	-1.32271	-0.403492	-1.23626	-0.305987	1.12288	0.167197	1.06992	0.0975058	1.16329	0.218214	1.2159	0.282028	-1.27675	-0.352476	-1.14168	-0.191156	1.11831	0.161319	Mothers against decapentaplegic homolog 2
C098R075	0.00323234	0.603747	0.231797	1.15942	0.213397	1.148	0.199121	1.04823	0.067962	-1.00994	-0.014276	1.13527	0.183039	1.00962	0.0138151	1.25568	0.328475	1.10571	0.144975	-1.13564	-0.1835	Proline-rich nuclear receptor coactivator 1	10957	Hs.75969
C112R075	0.00310597	0.254583	0.00034548	-1.24348	-0.314377	1.05969	0.0836407	1.12165	0.165627	1.3177	0.398018	1.33663	0.418595	1.25138	0.323525	-1.04348	-0.0614093	1.18225	0.241539	1.23366	0.302948	Cohesin subunit SA-1		Hs.412586
C166R075	0.00634312	0.254533	0.749382	-1.18833	-0.24894	-1.03153	-0.0447857	1.24327	0.314134	1.15201	0.204155	-1.07194	-0.10023	-1.0627	-0.0877403	-1.58371	-0.663304	-1.36288	-0.44666	1.16203	0.216644	Low-density lipoprotein receptor 2 precursor	373644	Xl.821
C194R075	0.00112866	0.942433	0.0480512	1.20856	0.273285	1.96891	0.977396	-1.35631	-0.439688	1.62914	0.70411	-1.37445	-0.458859	-1.22216	-0.289431	1.1926	0.254114	2.18503	1.12765	1.83215	0.873538	Ig kappa chain V region Mem5
C214R075	0.00184646	0.526388	0.000852408	-1.43866	-0.524728	-1.24901	-0.320787	1.1983	0.260987	1.15184	0.203941	1.32916	0.410517	1.51245	0.596892	-1.29702	-0.375197	1.01053	0.0151176	1.31068	0.390315	G patch domain-containing protein 8	23131	Hs.463129
C225R075	0.0033392	0.213554	0.00514542	1.16976	0.226207	1.12855	0.174472	-1.12503	-0.169969	-1.03651	-0.0517344	-1.05536	-0.0777356	-1.35357	-0.436775	1.24698	0.31844	-1.06609	-0.092333	-1.3294	-0.410773	F-box/LRR-repeat protein 5	242960	Mm.25794
C007R076	0.00129667	0.983667	0.853279	-1.35083	-0.433848	-1.10873	-0.148906	-1.00322	-0.00463636	1.21836	0.284942	1.01411	0.0202096	1.02978	0.0423327	-1.32777	-0.409002	-1.07321	-0.101937	1.23719	0.307065	UNKNOWN
C058R076	0.00985862	0.0318758	0.565786	-1.02212	-0.0315601	1.0099	0.0142137	1.08198	0.11367	1.03224	0.0457738	-1.17833	-0.236739	1.197	0.259418	-1.30312	-0.381969	1.11726	0.159963	1.45592	0.541931	Integrator complex subunit 1	68510	Mm.292942
C082R076	0.00126045	0.0197838	0.104795	1.55173	0.633876	1.27723	0.353014	-1.00789	-0.0113362	-1.21492	-0.280863	-1.4513	-0.537345	1.03954	0.0559429	1.07763	0.107868	1.3382	0.420293	1.24179	0.312425	Clusterin precursor
C089R076	0.00370863	0.211101	0.231581	1.48845	0.573814	1.66912	0.739091	-1.23521	-0.304754	1.12138	0.165277	-1.65494	-0.72678	1.19822	0.260891	1.11095	0.151788	2.47038	1.30474	2.22368	1.15295	Transient receptor potential cation channel subfamily V member 1	193034	Mm.447485
C153R076	0.00182079	0.216021	0.664128	1.66518	0.735681	1.50229	0.587168	1.18206	0.241304	-1.10843	-0.148513	-1.13798	-0.186475	-1.17151	-0.228373	1.23791	0.307902	1.08485	0.117491	-1.14109	-0.190411	Iron-sulfur cluster assembly enzyme ISCU, mitochondrial precursor	23479	Hs.615131
C184R076	0.000956759	0.0313539	0.946298	-1.61627	-0.69267	-1.41934	-0.505217	-1.15108	-0.202983	1.13875	0.187453	1.29931	0.37775	-1.11152	-0.152539	-1.08068	-0.111937	-1.37057	-0.454773	-1.26825	-0.342836	Fibulin-1 precursor	30240	Dr.120690; Dr.560
C230R076	0.00273866	0.21237	0.0246777	-1.11663	-0.15915	-1.19855	-0.261292	-1.08201	-0.11372	-1.07337	-0.102142	-1.03114	-0.0442359	-1.35876	-0.442289	-1.06412	-0.0896657	-1.5051	-0.589861	-1.4144	-0.500195	RWD domain-containing protein 4A	201965	Hs.133337; Hs.650425
C265R076	0.00872551	0.130757	0.000943494	1.14923	0.200665	1.04708	0.0663756	1.08849	0.122327	-1.09755	-0.13429	1.21319	0.278808	1.56426	0.645483	1.28089	0.357147	1.50476	0.589532	1.17478	0.232385	UNKNOWN
C029R077	0.00931688	0.107431	0.0837606	-1.24832	-0.319988	1.0335	0.0475387	-1.08501	-0.117705	1.29014	0.367527	1.174	0.231438	1.41607	0.501891	1.02041	0.0291548	1.58792	0.667135	1.55615	0.63798	Urea transporter, erythrocyte	6563	Hs.101307
C052R077	0.00193385	0.171372	0.00168876	1.28224	0.358668	1.17163	0.22852	-1.36772	-0.451771	-1.09441	-0.130148	-1.10398	-0.142717	-1.76868	-0.822672	1.58856	0.667722	-1.10373	-0.142381	-1.75334	-0.810103	Elongation factor 1-alpha 1	1915; 8805	Hs.490287; Hs.520703; Hs.586423; Hs.644639; Hs.646224
C061R077	0.0012145	0.982806	0.503482	1.45486	0.540875	1.66768	0.737843	-1.07087	-0.0987816	1.14629	0.196968	-1.05183	-0.072904	-1.11024	-0.150867	1.48119	0.566753	1.60855	0.685758	1.08599	0.119005	RNA 3'-terminal phosphate cyclase-like protein	59028	Mm.28630
C119R077	0.00115944	0.647525	0.0210943	1.21606	0.282217	1.69603	0.76216	1.17761	0.235859	1.39469	0.479943	1.45655	0.542551	1.32999	0.41142	1.50411	0.588909	1.9155	0.937721	1.27351	0.348812	Beta-2-microglobulin precursor
C147R077	4.20565e-05	0.604952	0.194212	1.44632	0.532384	1.35036	0.433348	-1.01437	-0.0205881	-1.07106	-0.0990359	-1.14385	-0.193898	-1.09177	-0.126667	1.2826	0.359075	1.25464	0.327269	-1.02229	-0.0318053	Cytochrome b5 domain-containing protein 2	795950; 796175	Dr.114925; Dr.83829
C009R078	0.00417823	0.865091	0.313638	1.46998	0.555795	-1.14511	-0.195491	-1.2546	-0.32723	-1.68329	-0.751285	-1.06959	-0.0970606	-1.17221	-0.229234	1.72424	0.785964	-1.06991	-0.0974951	-1.84479	-0.883459	Tissue factor pathway inhibitor 2 precursor	360007	Bt.29514
C070R078	0.00254914	0.429053	0.00970114	1.32333	0.404169	1.23354	0.302803	-1.17544	-0.233204	-1.07279	-0.101366	-1.33048	-0.411949	-1.08667	-0.119916	1.16912	0.225424	1.33431	0.41609	1.14129	0.190667	Receptor expression-enhancing protein 5	7905	Hs.429608
C075R078	6.77865e-05	0.433181	0.0329848	1.43541	0.521466	2.38033	1.25116	-1.33805	-0.420128	1.65829	0.729697	-1.73315	-0.793395	-1.10495	-0.143975	1.10818	0.148198	2.88249	1.52732	2.60109	1.37912	Ig kappa chain V region Mem5
C088R078	2.62895e-06	0.407659	0.78576	1.31971	0.400224	1.69914	0.764809	1.01096	0.0157304	1.28751	0.364585	1.08279	0.114752	-1.15138	-0.203364	1.41347	0.499245	1.45974	0.545714	1.03273	0.0464695	UNKNOWN
C205R078	0.000612595	0.379461	0.0844441	1.17013	0.226673	1.14117	0.190511	1.04484	0.0632864	-1.02538	-0.0361623	1.19765	0.260203	1.05139	0.0722949	1.34126	0.42359	1.14832	0.199519	-1.16802	-0.22407	Proline-rich protein 12	57479	Hs.590971
C047R079	0.00505828	0.74773	0.0210575	-1.38523	-0.470126	-1.18654	-0.246762	1.25562	0.328399	1.16745	0.223363	1.32733	0.408527	1.11772	0.160559	-1.31039	-0.389998	-1.33293	-0.414603	-1.0172	-0.0246047	AN1-type zinc finger protein 5	100047896; 22682	Mm.292405; Mm.379919
C078R079	0.00599407	0.624337	0.129052	-1.26791	-0.342457	-1.06969	-0.0971903	-1.14255	-0.192262	1.18531	0.245266	-1.02848	-0.0405143	-1.09394	-0.12953	-1.14132	-0.19071	-1.02417	-0.0344586	1.11439	0.156251	Small ubiquitin-related modifier 3 precursor	436950	Dr.116391; Dr.33371
C117R079	0.00348561	0.848879	0.114741	1.26263	0.336427	1.30848	0.387896	-1.06437	-0.0899968	1.03632	0.0514681	-1.143	-0.19282	-1.11248	-0.153782	1.17577	0.233604	1.25189	0.324111	1.06474	0.0905066	UNKNOWN
C140R079	0.00534944	0.514288	0.506765	1.33569	0.417582	1.24914	0.320941	-1.05187	-0.0729528	-1.06928	-0.0966416	-1.17567	-0.233484	1.06239	0.08731	1.19503	0.257051	1.39591	0.481204	1.16809	0.224152	Medium-chain specific acyl-CoA dehydrogenase, mitochondrial precursor	505968	Bt.61205
C161R079	0.00396196	0.980191	0.000433508	-1.2276	-0.295836	-1.14919	-0.200612	1.23106	0.299896	1.06823	0.0952237	1.25506	0.327757	1.22832	0.296684	-1.20412	-0.267975	-1.15175	-0.203824	1.04547	0.0641514	BTB/POZ domain-containing protein 10	84280	Hs.332382
C164R079	0.00296145	0.0118456	0.361377	-1.25195	-0.324173	-1.13718	-0.185467	1.0504	0.0709335	1.10092	0.138706	1.21673	0.283011	-1.58599	-0.665386	-1.0808	-0.112095	-1.89446	-0.921786	-1.75284	-0.809691	UNKNOWN
C172R079	0.000668268	0.485038	0.10421	-1.28591	-0.362785	-1.19112	-0.252323	-1.01751	-0.0250458	1.07957	0.110462	-1.10064	-0.138347	-1.28049	-0.356695	-1.39097	-0.476087	-1.49897	-0.583973	-1.07765	-0.107887	High mobility group protein B2	397130	Ssc.226
C175R079	0.00696889	0.181749	0.59501	1.1398	0.188776	1.13674	0.184908	-1.18658	-0.246813	-1.00268	-0.00386778	1.13652	0.184627	1.20774	0.272311	1.5371	0.620215	1.62905	0.704032	1.05982	0.083817	Fibroleukin precursor	10875	Hs.520989
C189R079	0.00697975	0.497413	0.257931	1.21257	0.278073	1.2013	0.264597	-1.04834	-0.0681121	-1.00938	-0.0134762	1.01394	0.0199758	-1.20926	-0.274125	1.28892	0.366161	1.04144	0.0585839	-1.23763	-0.307577	Lipoyltransferase 1, mitochondrial precursor	51601	Hs.516235
C195R079	0.00955407	0.682998	0.207609	-1.37092	-0.455149	-1.39558	-0.480861	1.07913	0.109873	-1.01798	-0.0257115	1.2454	0.316612	1.05919	0.0829616	-1.1879	-0.248411	-1.42185	-0.507772	-1.19695	-0.259362	Ammonium transporter Rh type B	445989	Tru.1898
C229R079	0.00593534	0.823684	0.36946	-1.18005	-0.238853	-1.20992	-0.274909	-1.0373	-0.052839	-1.02531	-0.0360554	-1.01179	-0.0169088	-1.1086	-0.148744	-1.15103	-0.202923	-1.29308	-0.370813	-1.12341	-0.16789	Adenylosuccinate lyase	396540	Gga.2721
C231R079	0.00034438	0.704366	0.00578814	1.50883	0.593427	1.27436	0.349774	-1.16384	-0.218891	-1.18399	-0.243653	-1.31895	-0.399393	-1.27719	-0.352968	1.33138	0.412925	1.16126	0.215696	-1.14649	-0.197228	Tetraspanin-14	52588	Mm.28876
C264R079	9.30039e-09	0.973994	0.214478	1.4687	0.55454	1.45735	0.543352	-1.05624	-0.0789442	-1.00779	-0.0111885	-1.0498	-0.0701164	-1.08026	-0.111375	1.47771	0.563368	1.42496	0.510921	-1.03702	-0.0524468	UNKNOWN
C021R080	0.00227429	0.745411	0.726118	1.38762	0.472617	1.56579	0.646891	-1.04463	-0.0629885	1.1284	0.174275	-1.14813	-0.199289	1.07278	0.101356	1.26253	0.336316	1.75471	0.811236	1.38984	0.47492	GPI inositol-deacylase	316400	Rn.205923
C040R080	0.00373005	0.0685979	1.39445e-08	-1.10209	-0.140236	2.21613	1.14804	3.64089	1.86429	2.44236	1.28828	12.4647	3.63977	8.58982	3.10263	3.10641	1.63525	5.22843	2.38638	1.68311	0.751131	UNKNOWN
C087R080	0.00637704	0.200312	0.000163158	1.2581	0.331251	1.22491	0.29268	-1.10275	-0.141108	-1.0271	-0.0385718	-1.29712	-0.375316	-1.2547	-0.327345	1.06958	0.097043	1.07657	0.106442	1.00654	0.00939921	60S ribosomal protein L23
C132R080	0.00238808	0.798917	0.667485	-1.37452	-0.458929	-1.69115	-0.758004	-1.13265	-0.179705	-1.23036	-0.299075	-1.01017	-0.0145987	1.00905	0.0130018	-1.22588	-0.293823	-1.47969	-0.565297	-1.20704	-0.271474	Integrin beta-like protein 1 precursor	9358	Hs.696554
C161R080	0.000144286	0.226814	2.50517e-07	2.76526	1.46742	1.64235	0.715758	-2.10284	-1.07234	-1.68373	-0.751659	-3.59527	-1.8461	-2.72192	-1.44462	1.61738	0.69366	1.26881	0.343476	-1.27472	-0.350183	Plasma retinol-binding protein 1
C168R080	0.00458958	0.276424	0.00432122	1.30737	0.386662	1.32137	0.402039	-1.05666	-0.0795141	1.01072	0.0153765	-1.21874	-0.285385	-1.313	-0.392862	1.13351	0.180792	1.0634	0.0886906	-1.06592	-0.0921012	Cystatin-B
C180R080	0.00830857	0.958676	0.0223077	-1.12753	-0.173172	-1.17702	-0.235141	-1.11749	-0.160262	-1.04389	-0.0619685	-1.09388	-0.12946	-1.09289	-0.128147	-1.10372	-0.14237	-1.15111	-0.203026	-1.04294	-0.0606558	Dynein light chain 1, cytoplasmic	31405	Dm.5892
C202R080	0.000699398	0.184291	0.25937	-1.17717	-0.235327	-1.1986	-0.261347	1.15486	0.207721	-1.0182	-0.0260202	-1.07935	-0.110168	1.16185	0.216428	-1.46735	-0.553216	-1.19138	-0.25264	1.23164	0.300576	UNKNOWN
C207R080	0.0056861	0.485765	0.0166184	1.8227	0.866074	1.12915	0.175241	-1.2029	-0.266515	-1.61422	-0.690833	-1.65139	-0.723681	-1.35772	-0.441189	1.32768	0.408908	1.00039	0.000567138	-1.32716	-0.408341	Lysosomal protective protein precursor	5476	Hs.652282
C210R080	0.00773653	0.0703381	0.807752	1.28781	0.364923	1.05077	0.0714475	1.14618	0.196836	-1.22559	-0.293475	-1.09919	-0.136441	-1.08229	-0.114089	1.02218	0.031645	-1.18057	-0.239478	-1.20675	-0.271123	UNKNOWN
C038R081	1.16184e-07	0.962211	0.684597	1.35542	0.438742	1.57979	0.659737	-1.00701	-0.0100741	1.16554	0.220995	-1.01186	-0.0170035	-1.04376	-0.0617911	1.34893	0.431812	1.52417	0.60802	1.12991	0.176208	UNKNOWN
C053R081	0.00317632	0.035915	0.0532004	1.70224	0.767435	1.27231	0.347446	-1.16975	-0.226195	-1.33792	-0.419989	-1.73372	-0.793867	1.11245	0.153734	1.14851	0.199763	1.65562	0.727375	1.44154	0.527613	Clusterin precursor
C074R081	0.000152692	0.774182	0.531175	-1.38776	-0.472755	-1.15769	-0.211251	1.1214	0.165302	1.19873	0.261504	1.04345	0.0613664	-1.01701	-0.0243408	-1.49142	-0.576691	-1.32033	-0.400894	1.12959	0.175797	CXXC-type zinc finger protein 5	51523	Hs.189119
C102R081	0.000680963	0.85105	0.946269	-1.38266	-0.467451	-1.38511	-0.469999	-1.0374	-0.0529727	-1.00177	-0.00254762	-1.0221	-0.0315387	1.07674	0.106675	-1.36227	-0.446017	-1.24001	-0.310351	1.0986	0.135666	Tubulin alpha chain, testis-specific
C133R081	0.000384703	0.487723	0.0504749	1.24101	0.311514	1.2375	0.307431	-1.19116	-0.252369	-1.00283	-0.00408255	-1.03386	-0.0480448	-1.19816	-0.260818	1.42982	0.515838	1.23028	0.298982	-1.1622	-0.216856	Tripartite motif-containing protein 39	79263	Mm.40624
C228R081	0.000441712	0.415843	0.0292383	1.31843	0.398816	1.15297	0.205349	-1.17414	-0.231608	-1.14351	-0.193467	-1.04897	-0.0689749	-1.36447	-0.448344	1.47575	0.561448	-1.00792	-0.0113871	-1.48744	-0.572835	Ras-related protein Rab-1A	5861	Hs.310645
C051R082	0.0012183	0.438006	0.241526	-1.12764	-0.173311	1.0264	0.037594	1.11625	0.158664	1.15741	0.210905	1.04055	0.0573514	-1.0124	-0.0177771	-1.20968	-0.274624	-1.10103	-0.138847	1.09868	0.135777	Negative elongation factor D
C080R082	2.48139e-05	0.337119	0.669664	-1.45282	-0.538853	-1.80011	-0.848084	1.1091	0.149387	-1.23905	-0.309231	-1.25796	-0.331087	-1.01758	-0.0251469	-2.02697	-1.01933	-2.0316	-1.02262	-1.00228	-0.00329098	G2/mitotic-specific cyclin-B1
C087R082	3.60037e-05	0.551803	4.7885e-05	1.45806	0.544053	1.36329	0.447096	-1.2231	-0.29054	-1.06952	-0.0969575	-1.37902	-0.463648	-1.38645	-0.471394	1.2932	0.370945	1.20267	0.266241	-1.07527	-0.104704	Microsomal glutathione S-transferase 3	66447	Mm.218286
C164R082	0.00294156	0.120878	0.37803	-1.07953	-0.110409	-1.21007	-0.275089	1.17072	0.227395	-1.12092	-0.16468	-1.07624	-0.105997	-1.37784	-0.462405	-1.36018	-0.443801	-1.95191	-0.964889	-1.43504	-0.521088	Ras-related protein Rab-27B	282858	Bt.12771
C230R082	7.68099e-06	0.627807	0.000100949	1.83618	0.876708	1.52144	0.605441	-1.44505	-0.531115	-1.20687	-0.271267	-1.68367	-0.751609	-1.39835	-0.483727	1.57594	0.656214	1.57225	0.652829	-1.00235	-0.00338527	Ependymin precursor
C231R082	0.00491156	0.805135	0.493831	-1.14451	-0.194725	-1.20743	-0.271939	-1.02177	-0.0310675	-1.05498	-0.0772132	1.00247	0.00356375	-1.08801	-0.121691	-1.11736	-0.160094	-1.28571	-0.362562	-1.15067	-0.202468	Malate dehydrogenase, cytoplasmic	421281	Gga.1141
C251R082	0.00209429	0.892656	0.0090411	-1.33204	-0.413639	-1.13274	-0.179815	1.19887	0.261678	1.17595	0.233824	1.2562	0.329065	1.16337	0.218308	-1.27125	-0.346251	-1.16731	-0.223185	1.08905	0.123066	Receptor-type tyrosine-protein phosphatase F precursor	5792	Hs.272062
C142R083	0.000865982	0.260545	0.610235	-1.2176	-0.284045	-1.28983	-0.367178	1.0027	0.00388813	-1.05932	-0.0831335	-1.08665	-0.119881	1.18324	0.24274	-1.32667	-0.407814	-1.09302	-0.128326	1.21376	0.279487	High mobility group protein B2	397130	Ssc.226
C144R083	0.00726089	0.112053	0.0213031	1.68857	0.755798	1.17857	0.23704	1.03997	0.0565359	-1.43272	-0.518758	-1.37153	-0.45579	-2.06924	-1.0491	1.18384	0.243472	-1.82589	-0.868599	-2.16156	-1.11207	Acyl-coenzyme A oxidase 3, peroxisomal	8310	Hs.479122
C152R083	0.000483693	0.713855	0.813727	1.77614	0.828746	1.6765	0.745454	1.15379	0.20638	-1.05943	-0.0832919	-1.03138	-0.0445799	-1.0318	-0.0451666	1.49256	0.577786	1.40825	0.493908	-1.05986	-0.0838785	Paxillin	5829	Hs.446336
C264R083	0.00216022	0.212135	0.00488271	-1.62497	-0.700415	-1.22244	-0.289764	1.06938	0.0967733	1.32929	0.410651	1.41429	0.500077	1.56619	0.647257	-1.22868	-0.297112	1.19808	0.260719	1.47206	0.557832	La-related protein 1		Mm.248843
C044R084	0.00264202	0.355866	0.263629	-1.26938	-0.344126	-1.1154	-0.157555	1.28718	0.364212	1.13806	0.186571	-1.04267	-0.0602878	1.14131	0.19069	-1.70365	-0.768626	-1.25795	-0.331078	1.3543	0.437549	Tubulin beta chain	380418	Xl.46552
C060R084	0.00634156	0.0187856	0.000732586	1.0922	0.127243	1.08925	0.123333	1.15172	0.20379	-1.00271	-0.00391024	1.08063	0.111878	2.0347	1.02482	1.02479	0.0353309	1.92433	0.944358	1.87778	0.909027	Prostacyclin synthase	5740	Hs.302085
C069R084	0.000608064	0.0121737	0.473416	1.09654	0.132954	1.19141	0.252666	-1.1505	-0.202265	1.08652	0.119712	-1.38136	-0.466088	1.35323	0.436406	-1.09495	-0.13087	1.85489	0.891336	2.03102	1.02221	UNKNOWN
C091R084	0.00586128	0.198497	0.00127683	1.50276	0.587618	1.05007	0.0704911	-1.1217	-0.165689	-1.4311	-0.517127	-1.52786	-0.611517	-1.51308	-0.597486	1.10327	0.14179	-1.28459	-0.361306	-1.41725	-0.503096	Brain protein 44-like protein	55951	Mm.288510
C107R084	0.000864885	0.180454	0.0391928	-1.35435	-0.437601	-1.20125	-0.264535	1.17181	0.228734	1.12745	0.173067	1.33044	0.411907	-1.03186	-0.0452424	-1.19286	-0.254428	-1.45247	-0.538511	-1.21764	-0.284083	UNKNOWN
C118R084	1.39326e-06	0.211457	4.85103e-07	2.16734	1.11592	2.04785	1.03411	-1.54031	-0.623218	-1.05835	-0.0818154	-1.87135	-0.904079	-2.49601	-1.31962	1.78394	0.835064	1.26375	0.337707	-1.41163	-0.497358	GTP-binding nuclear protein Ran
C163R084	0.00738427	0.337427	0.0828843	1.56158	0.643005	1.28033	0.356515	-1.10335	-0.141892	-1.21967	-0.28649	-1.4257	-0.511673	-1.06529	-0.09124	1.20851	0.273224	1.32608	0.407167	1.09729	0.133943	UNKNOWN
C215R084	0.000289117	0.125339	0.889656	1.41097	0.496691	1.13525	0.183009	-1.14376	-0.193784	-1.24288	-0.313682	-1.16126	-0.215692	1.2863	0.363223	1.38971	0.474784	1.67019	0.740016	1.20183	0.265232	Ferritin, middle subunit
C004R085	0.00474434	0.650443	0.157002	-1.28024	-0.356409	-1.19074	-0.251864	1.12024	0.163809	1.07516	0.104546	1.0231	0.0329455	1.24189	0.312534	-1.40179	-0.487273	-1.07411	-0.103139	1.30508	0.384134	Bullous pemphigoid antigen 1, isoforms 6/9/10	667	Hs.631992; Hs.669931
C071R085	0.00085641	0.28654	0.0194449	-1.03078	-0.0437325	1.1872	0.247561	1.05291	0.0743873	1.22374	0.291294	1.08714	0.120532	1.33705	0.419058	1.00167	0.00241239	1.50758	0.592232	1.50506	0.58982	RRP1-like protein B	23076	Hs.654727
C081R085	0.000588182	0.0650625	0.000479639	1.32042	0.400993	1.45544	0.541457	-1.04462	-0.0629736	1.10226	0.140464	-1.30849	-0.387901	-1.31575	-0.39589	1.05414	0.0760655	1.15552	0.20854	1.09617	0.132475	60S ribosomal protein L4-B		Xl.8805
C112R085	0.00436424	0.861277	0.92614	-1.1926	-0.254105	-1.47444	-0.560171	-1.03337	-0.0473573	-1.23633	-0.306065	1.04993	0.070291	-1.03962	-0.0560601	-1.0992	-0.136457	-1.48336	-0.568873	-1.34949	-0.432417	UNKNOWN
C114R085	0.00546212	0.207469	0.00229103	1.1875	0.24793	1.02476	0.0352892	-1.07371	-0.102605	-1.15881	-0.212641	-1.15821	-0.211891	-1.40204	-0.487524	1.10087	0.138644	-1.27423	-0.34963	-1.40277	-0.488274	UNKNOWN
C141R085	0.00820189	0.10844	0.0155203	1.95612	0.967994	1.77985	0.831758	-1.24201	-0.31268	-1.09903	-0.136235	-2.24669	-1.1678	-1.15195	-0.204078	1.08138	0.112871	1.91901	0.940361	1.77459	0.82749	72149 pfam08725, Integrin_b_cyt, Integrin beta cytoplasmic domain. Integrins are a group of transmembrane proteins which function as extracellular matrix receptors and in cell adhesion. Integrins are ubiquitously expressed and are heterodimeric, each c...
C156R085	0.00257587	0.163493	2.7078e-13	1.37767	0.462228	1.26179	0.335472	5.55203	2.47301	-1.09184	-0.126755	10.0971	3.33587	10.7694	3.42887	2.50547	1.32508	2.44753	1.29133	-1.02367	-0.033754	TRAF and TNF receptor-associated protein homolog		Dr.18071
C169R085	0.00447733	0.883664	0.523806	1.23959	0.309865	1.30792	0.387276	-1.00371	-0.00534874	1.05512	0.0774105	-1.06539	-0.0913793	-1.05304	-0.0745613	1.16783	0.223835	1.24666	0.318063	1.06749	0.0942285	mRNA turnover protein 4 homolog	51154	Hs.463797
C202R085	0.00430486	0.65003	0.568572	-1.03295	-0.0467691	-1.4954	-0.580529	1.06139	0.0859597	-1.4477	-0.53376	-1.12615	-0.171404	-1.12528	-0.170287	-1.23468	-0.304132	-1.78605	-0.836776	-1.44658	-0.532643	Transcription factor SOX-11	396104	Gga.32193
C244R085	1.43465e-05	0.453665	0.524482	-1.21477	-0.280685	-1.47553	-0.561232	-1.02269	-0.032362	-1.21466	-0.280547	-1.13028	-0.176679	1.04237	0.0598682	-1.34257	-0.425001	-1.38415	-0.469002	-1.03097	-0.0440002	UNKNOWN
C024R086	0.00142049	0.586985	0.981187	1.32816	0.409425	1.39177	0.476925	-1.04919	-0.0692763	1.0479	0.0674994	-1.10251	-0.140787	1.14961	0.201139	1.26393	0.337915	1.6787	0.74734	1.32816	0.409425	RNA-binding protein with multiple splicing	395678	Gga.2695
C091R086	0.00133295	0.3242	0.719504	-1.15492	-0.207791	-1.12521	-0.170195	1.14084	0.190091	1.0264	0.0375968	-1.00951	-0.0136514	-1.06292	-0.0880336	-1.3301	-0.411534	-1.36445	-0.448319	-1.02583	-0.0367853	UNKNOWN
C120R086	0.00784079	0.0628921	5.49039e-13	-1.02295	-0.0327333	1.21599	0.282125	3.41828	1.77327	1.24389	0.314859	5.47772	2.45358	7.7469	2.95362	1.56653	0.647574	2.75581	1.46248	1.75918	0.814902	Signal transducer and activator of transcription 1		Mm.277406
C156R086	0.00282227	0.0140106	0.477491	1.28158	0.357918	1.3418	0.424166	1.14289	0.192685	1.04699	0.0662475	-1.09959	-0.136965	-1.13495	-0.182625	1.01979	0.0282681	1.03444	0.0488554	1.01437	0.0205872	40S ribosomal protein S13
C195R086	0.0008422	0.933228	0.000769258	-1.33557	-0.417454	-1.04334	-0.0612131	1.30107	0.379695	1.28009	0.356241	1.32173	0.402425	1.23766	0.307621	-1.31469	-0.394723	-1.09679	-0.133287	1.19867	0.261436	Cytoplasmic dynein 1 light intermediate chain 1	51143	Hs.529495
C214R086	0.00750977	0.311386	0.0044529	1.45941	0.545384	1.09776	0.134564	-1.16948	-0.225861	-1.32944	-0.41082	-1.47153	-0.557313	-1.19093	-0.252091	1.15985	0.213932	1.07798	0.108334	-1.07594	-0.105598	Neuronal membrane glycoprotein M6-b	2824	Hs.495710
C007R087	0.00565436	0.385588	1.91714e-09	2.01914	1.01374	1.3447	0.427281	-2.90917	-1.54061	-1.50156	-0.586461	-4.30468	-2.10591	-3.15059	-1.65562	1.36457	0.448443	1.24166	0.312266	-1.09899	-0.136177	Heme-binding protein 2	23593	Hs.486589
C043R087	0.00651333	0.110593	0.0614561	1.45816	0.544145	1.38015	0.464829	-1.00592	-0.00851494	-1.05652	-0.0793152	-1.38372	-0.468556	-1.10486	-0.143866	1.06003	0.0841037	1.25656	0.329479	1.1854	0.245375	Ornithine decarboxylase antizyme 2	4947	Hs.643010; Hs.74563
C078R087	0.000139502	0.100646	0.0837626	-1.3432	-0.425673	-1.34432	-0.426878	1.10558	0.144809	-1.00084	-0.00120583	-1.49544	-0.580569	-1.38219	-0.466958	-2.22076	-1.15105	-2.0543	-1.03865	1.08103	0.112406	Farnesyl pyrophosphate synthetase		Gga.42725
C086R087	7.74073e-05	0.0665744	0.0660839	1.7191	0.781656	1.62009	0.696078	1.04087	0.0577935	-1.06111	-0.0855784	-1.39656	-0.481877	-1.15333	-0.205803	1.18262	0.241985	1.34955	0.432481	1.14116	0.190496	Ictacalcin
C095R087	0.00504036	0.169455	0.103669	1.35756	0.44102	1.26059	0.334104	1.04111	0.058127	-1.07692	-0.106916	-1.18141	-0.240513	-1.17281	-0.229965	1.10372	0.14238	1.03241	0.046012	-1.06908	-0.0963682	Tubulin alpha-4A chain	7277	Hs.75318
C188R087	0.000394667	0.470359	2.09729e-05	1.66709	0.737336	1.5088	0.593404	-1.38405	-0.468896	-1.10491	-0.143932	-1.63587	-0.710057	-1.83794	-0.878092	1.41047	0.496175	1.13619	0.184208	-1.2414	-0.311967	117573 pfam09007, EBP50_C-term, EBP50, C-terminal. This C terminal domain allows interaction of EBP50 with FERM (four-point one ERM) domains, resulting in the activation of Ezrin-radixin-moesin (ERM), with subsequent cytoskeletal modulation and cellul...
C192R087	0.00221805	0.861715	0.941053	-1.1305	-0.17696	1.11901	0.162219	-1.03001	-0.0426592	1.26504	0.339179	-1.00281	-0.00405407	1.04478	0.0632004	-1.10065	-0.138355	1.2042	0.268078	1.32541	0.406434	ATP-binding cassette sub-family D member 3	5825	Hs.700576
C194R087	0.00221775	0.702921	0.0596286	1.20917	0.27402	-1.02036	-0.0290841	-1.1241	-0.168771	-1.2338	-0.303104	-1.14569	-0.196221	-1.0304	-0.0432048	1.18638	0.246571	1.06916	0.0964823	-1.10964	-0.150088	Dynein light chain roadblock-type 2	768062	Bt.18339
C206R087	0.000279601	0.278499	0.0188891	1.35254	0.435666	1.0634	0.0886904	-1.18378	-0.243404	-1.27189	-0.346976	-1.27788	-0.353752	-1.00367	-0.00528727	1.25294	0.325318	1.25423	0.326807	1.00103	0.00148916	Thioredoxin domain-containing protein 17	445062; 793434	Dr.34068
C209R087	9.57195e-05	0.420317	0.966731	2.09472	1.06676	1.75497	0.811447	1.13569	0.183573	-1.19359	-0.25531	-1.2069	-0.271303	1.04678	0.0659537	1.52825	0.611881	1.61757	0.693827	1.05844	0.081946	Lysozyme g
C217R087	2.3036e-05	0.515967	0.107352	2.18649	1.12861	2.73837	1.45332	-1.2528	-0.325154	1.25241	0.324706	-1.65647	-0.728109	-1.06676	-0.0932374	1.65366	0.725659	3.21593	1.68524	1.94474	0.959577	117849 pfam09307, MHC2-interact, CLIP, MHC2 interacting. Members of this family are found in class II invariant chain-associated peptide (CLIP), and are required for association with class II major histocompatibility complex (MHC) in the MHC class II ...
C229R087	0.000998039	0.222031	0.357236	1.14206	0.191637	1.11153	0.152543	-1.19313	-0.254747	-1.02747	-0.039094	1.00121	0.00174877	1.01995	0.0285053	1.36427	0.448133	1.35266	0.435796	-1.00859	-0.0123374	mRNA turnover protein 4 homolog	51154	Hs.463797
C006R088	4.76556e-05	0.495724	0.0464038	1.61259	0.689379	1.33892	0.421065	-1.08236	-0.114182	-1.2044	-0.268314	-1.28833	-0.365498	-1.13465	-0.182246	1.35478	0.438063	1.27721	0.353001	-1.06073	-0.0850623	Peroxiredoxin-5, mitochondrial precursor	25824	Hs.502823
C037R088	0.00769866	0.660247	0.00444389	-1.17812	-0.236487	1.4197	0.505589	-1.27478	-0.35025	1.67258	0.742076	-1.20606	-0.270308	-1.50099	-0.585912	-1.11461	-0.156545	1.20575	0.269927	1.34394	0.426472	Maleylacetoacetate isomerase	14874	Mm.29652; Mm.390529
C060R088	0.00596683	0.0897623	0.0538212	1.43447	0.520517	1.46766	0.553518	1.06803	0.0949541	1.02314	0.0330013	-1.20887	-0.273658	-1.34103	-0.423341	1.11104	0.151904	1.02472	0.0352234	-1.08424	-0.116681	Cytochrome c oxidase assembly protein COX15 homolog	226139	Mm.248237; Mm.435704
C063R088	0.00169684	0.954914	0.453368	1.04343	0.0613282	1.26516	0.33932	1.03631	0.0514545	1.21251	0.277991	1.01799	0.0257238	1.05593	0.0785189	1.02498	0.0355974	1.28912	0.366384	1.2577	0.330787	Arginine and glutamate-rich protein 1-B	406834	Dr.75129
C092R088	0.00235411	0.581706	0.000104184	1.36695	0.45096	1.35377	0.436987	1.45107	0.537113	-1.00973	-0.0139733	1.81131	0.857033	1.85989	0.895214	1.70631	0.770881	1.73518	0.795088	1.01692	0.0242075	UNKNOWN
C136R088	0.00162673	0.189392	0.829024	-1.17546	-0.233227	-1.29531	-0.373293	1.26312	0.336988	-1.10196	-0.140066	1.08323	0.115341	-1.28374	-0.360352	-1.37066	-0.454874	-2.10035	-1.07063	-1.53236	-0.615759	Transmembrane protein 47	83604	Hs.8769
C176R088	0.000278519	0.620932	0.000134196	-1.51476	-0.599091	-1.22295	-0.290367	1.27142	0.346444	1.23861	0.308724	1.46616	0.552038	1.40623	0.491837	-1.31357	-0.393497	-1.10571	-0.144974	1.18799	0.248523	Splicing factor U2AF 65 kDa subunit		Mm.360389
C036R089	0.00141154	0.832738	0.278777	3.32923	1.73519	3.88544	1.95808	-1.50584	-0.590566	1.16707	0.22289	-1.83993	-0.879648	-1.0846	-0.117164	2.72472	1.44611	5.39447	2.43148	1.97983	0.985375	Pro-MCH 2 precursor
C051R089	0.00609395	0.163616	0.40451	-1.43396	-0.520008	-1.32237	-0.403131	-1.12292	-0.16726	1.08439	0.116877	1.12511	0.170072	1.19004	0.251015	-1.13499	-0.182676	1.01055	0.0151443	1.14696	0.197821	Cell division control protein 42 homolog precursor	12540	Mm.1022; Mm.447553
C083R089	2.43627e-06	0.899309	0.137265	1.36715	0.451168	1.69803	0.763859	-1.12932	-0.175456	1.24202	0.312691	-1.06725	-0.093901	-1.13908	-0.18787	1.44666	0.532723	1.68348	0.751445	1.1637	0.218721	Vitamin D3 receptor
C108R089	0.00135695	0.344681	0.289225	1.22141	0.288549	1.37471	0.45913	-1.03632	-0.0514739	1.12551	0.170581	1.27363	0.348948	1.09914	0.136374	1.61213	0.688971	1.56588	0.646978	-1.02954	-0.0419931	ATP-binding cassette sub-family A member 1		Mm.277376
C131R089	0.0068774	0.0392471	0.64481	-1.22977	-0.298388	-1.00654	-0.00939818	1.07579	0.10539	1.22178	0.28899	1.18098	0.239986	-1.1886	-0.249261	-1.12023	-0.163793	-1.28703	-0.36405	-1.1489	-0.200257	E3 ubiquitin-protein ligase BRE1A	513326	Bt.10397
C136R089	1.47152e-05	0.512499	0.720659	-1.63594	-0.710124	-1.33595	-0.417863	-1.11785	-0.160722	1.22456	0.29226	1.05596	0.0785577	-1.01968	-0.0281232	-1.38592	-0.470844	-1.21863	-0.285265	1.13727	0.185579	FACT complex subunit SSRP1	6749	Hs.523680
C163R089	0.00693752	0.794537	0.00215334	-1.23949	-0.309745	1.15828	0.211986	1.22632	0.294341	1.43568	0.521731	1.36338	0.447192	1.32169	0.402379	-1.11488	-0.156894	1.24835	0.320025	1.39177	0.476919	Transposable element Tcb1 transposase
C170R089	0.000192193	0.763875	0.111263	1.47293	0.558686	1.82627	0.868904	1.17858	0.237046	1.23989	0.310217	1.08636	0.119502	1.3437	0.426213	1.35768	0.441142	2.08215	1.05807	1.53361	0.616929	Oocyte zinc finger protein XlCOF20
C198R089	2.34148e-05	0.643055	0.893751	1.55507	0.636979	2.64169	1.40146	-1.17048	-0.227098	1.69876	0.764484	-1.13673	-0.184891	1.24806	0.319685	1.60124	0.679186	3.85905	1.94825	2.41005	1.26906	Transketolase	445425	Bt.4750
C037R090	0.000584416	0.876347	0.478113	1.25711	0.330111	1.36249	0.446246	1.04504	0.0635586	1.08383	0.116135	1.00453	0.00652695	1.09154	0.126362	1.20838	0.273079	1.42311	0.509049	1.1777	0.235969	Pleiotropic regulator 1	533951	Bt.74313
C058R090	0.00951729	0.808342	0.249475	-1.11223	-0.153458	-1.07498	-0.104308	-1.03274	-0.0464762	1.03465	0.0491495	-1.08079	-0.11209	-1.02714	-0.0386381	-1.16398	-0.219071	-1.06915	-0.09647	1.0887	0.122601	UNKNOWN
C153R090	0.00155097	0.0680111	0.000833727	1.46901	0.554846	1.42463	0.510582	-1.0409	-0.0578282	-1.03116	-0.044264	-1.36482	-0.448707	-1.42513	-0.511092	1.12036	0.163967	1.04053	0.0573184	-1.07672	-0.106649	Calponin-3	54321	Rn.57635
C161R090	0.00809571	0.413496	0.000257015	1.21886	0.285531	1.20668	0.271046	-1.54575	-0.628305	-1.01009	-0.0144852	-1.24639	-0.317753	-1.59701	-0.675374	1.51161	0.596083	1.16795	0.223977	-1.29424	-0.372107	PCTP-like protein	56018	Mm.28896
C166R090	7.83504e-05	0.36467	0.00192823	1.20791	0.272514	1.59801	0.67628	1.18707	0.247401	1.32296	0.403767	1.31579	0.395934	1.71437	0.777683	1.3389	0.421046	2.30787	1.20656	1.72371	0.785516	Beta-2-microglobulin precursor
C203R090	0.000118462	0.740535	0.000575952	3.35514	1.74637	1.98129	0.986439	2.34765	1.23122	-1.69341	-0.759932	1.90708	0.931365	2.97905	1.57485	2.72549	1.44652	2.51415	1.33007	-1.08406	-0.116446	Galectin-3-binding protein precursor	3959	Hs.514535
C010R091	0.00495442	0.132707	0.00468365	-1.19972	-0.262701	1.14019	0.189275	1.04384	0.0618999	1.36791	0.451976	1.33029	0.411745	1.23451	0.303934	1.06227	0.0871447	1.34846	0.43131	1.26942	0.344165	NFX1-type zinc finger-containing protein 1	98999	Mm.297074
C026R091	0.00555866	0.37581	0.476317	-1.06916	-0.0964748	-1.10507	-0.144135	1.04567	0.0644335	-1.03359	-0.0476603	-1.05632	-0.0790463	-1.08072	-0.111999	-1.18096	-0.239955	-1.24882	-0.320568	-1.05747	-0.080613	ATP synthase lipid-binding protein, mitochondrial precursor	228033	Mm.2966
C030R091	0.00142359	0.164441	0.000997739	-1.35598	-0.439333	-1.23048	-0.299225	1.15256	0.204837	1.10199	0.140108	1.185	0.244885	1.67326	0.742662	-1.31885	-0.399285	1.17985	0.2386	1.55605	0.637885	Complement C1q-like protein 2 precursor	226359	Mm.337409
C085R091	0.0081865	0.628541	0.00971472	2.9024	1.53725	1.14827	0.199462	1.99122	0.993656	-2.52763	-1.33779	1.59029	0.669287	3.27481	1.71141	2.318	1.21288	1.88847	0.91722	-1.22745	-0.29566	40S ribosomal protein S2
C130R091	0.0021378	0.883813	0.00765171	1.44764	0.533701	1.42813	0.514129	-1.37564	-0.460099	-1.01366	-0.0195717	-1.27	-0.34483	-1.44295	-0.52902	1.56805	0.648971	1.36151	0.445208	-1.1517	-0.203762	Caldesmon	800	Hs.490203
C222R091	0.00176983	0.142267	0.0340841	-1.49693	-0.582003	-1.25409	-0.32664	1.23199	0.300994	1.19364	0.255362	1.50673	0.591424	-1.04506	-0.0635836	-1.22397	-0.291573	-1.61465	-0.691218	-1.31918	-0.399645	Calcium/calmodulin-dependent protein kinase type II gamma chain	818	Hs.699281
C223R091	0.00317445	0.718299	0.566974	-1.22853	-0.296931	-1.37427	-0.458666	-1.02141	-0.0305639	-1.11863	-0.161734	1.08036	0.111516	1.05079	0.0714676	-1.11331	-0.154851	-1.28043	-0.356634	-1.15012	-0.201783	Lamin-B receptor	98386	Mm.4538
C231R091	0.00151897	0.0217804	0.00335002	-1.12634	-0.171644	-1.14549	-0.195959	-1.12213	-0.166241	-1.017	-0.0243153	1.01162	0.0166622	-1.48271	-0.568237	1.00783	0.0112592	-1.51357	-0.597955	-1.52543	-0.609214	Replication protein A 70 kDa DNA-binding subunit		Dr.76790
C247R091	0.00420458	0.156682	0.213761	1.00633	0.00910813	1.11695	0.159569	-1.05913	-0.0828731	1.10992	0.150461	1.04677	0.065946	1.22491	0.292672	1.11568	0.157927	1.44906	0.535115	1.29881	0.377188	Pinin	5411	Hs.409965
C252R091	0.00209554	0.385502	0.279562	-1.5463	-0.628822	-1.10143	-0.139375	-1.07236	-0.10079	1.40391	0.489447	1.12951	0.175698	1.32431	0.405245	-1.27662	-0.352333	1.28936	0.36666	1.64603	0.718994	28981 cd00098, IGc, Immunoglobulin domain constant region subfamily; members of the IGc subfamily are components of immunoglobulins, T-cell receptors, CD1 cell surface glycoproteins, secretory glycoproteins A/C, and Major Histocompatibility Complex (MH...
C020R092	0.0015876	0.82724	0.0154672	1.43259	0.518627	1.42944	0.51545	-1.28392	-0.360555	-1.0022	-0.0031772	-1.19836	-0.261056	-1.40633	-0.491937	1.53488	0.618126	1.30502	0.384067	-1.17614	-0.234059	Annexin A2-A	397754	Xl.2610
C113R092	0.00023905	0.334687	1.5119e-05	1.8511	0.888386	1.54737	0.629822	-1.48966	-0.57498	-1.19629	-0.258564	-2.01464	-1.01052	-1.61369	-0.690364	1.36874	0.452843	1.42844	0.514438	1.04362	0.061595	Galectin-3		Mm.248615
C121R092	0.00325127	0.600491	1.40062e-05	-1.2262	-0.29419	-1.46112	-0.547074	-1.58568	-0.6651	-1.19159	-0.252884	-1.42639	-0.512368	-1.80666	-0.853328	-1.10302	-0.141458	-1.66475	-0.735302	-1.50926	-0.593844	ADP-sugar pyrophosphatase	11164	Hs.555956
C167R092	3.06201e-06	0.880651	0.487793	1.45698	0.542977	1.70133	0.766666	-1.00367	-0.00528073	1.16772	0.223689	-1.06425	-0.0898418	-1.08067	-0.111922	1.37403	0.458416	1.58011	0.660025	1.14998	0.201609	UNKNOWN
C196R092	0.00319403	0.294172	0.614244	1.17835	0.236768	1.19846	0.26118	-1.09523	-0.13123	1.01706	0.0244116	-1.13536	-0.183155	1.13291	0.180031	1.13669	0.184843	1.48704	0.572441	1.30821	0.387598	Sestrin-1
C207R092	0.00684726	0.23943	0.603394	-1.07114	-0.0991406	-1.14157	-0.191021	1.09733	0.133991	-1.06576	-0.0918807	-1.09972	-0.137134	-1.09289	-0.12815	-1.29259	-0.370266	-1.36904	-0.453162	-1.05914	-0.0828966	Nuclear transport factor 2	291981	Rn.107980
C239R092	1.22593e-06	0.644227	0.0678358	2.5516	1.3514	1.60412	0.681778	-1.34308	-0.425547	-1.59066	-0.669627	-1.48382	-0.569312	-1.06619	-0.0924697	2.3096	1.20764	2.0207	1.01486	-1.14297	-0.192785	UNKNOWN
C256R092	0.00201981	0.601822	0.184905	1.19996	0.262982	1.50077	0.585705	1.13233	0.17929	1.25069	0.322723	1.1983	0.260987	-1.01228	-0.017605	1.26987	0.344679	1.30931	0.38881	1.03106	0.0441311	UNKNOWN
C021R093	0.00233924	0.672762	0.77797	1.7068	0.771293	2.08171	1.05777	1.21853	0.285141	1.21966	0.286475	1.0237	0.0337928	-1.10923	-0.149562	1.4339	0.519945	1.54014	0.623065	1.07409	0.10312	Phospholipase A1 member A precursor	334017	Dr.106430
C030R093	0.000746301	0.835573	0.80331	1.29433	0.37221	1.0749	0.104201	1.02227	0.031777	-1.20415	-0.26801	1.00524	0.00753376	-1.07561	-0.105153	1.27277	0.347967	-1.02295	-0.0327295	-1.30197	-0.380696	UNKNOWN
C055R093	0.000830583	0.246416	0.00346171	1.13146	0.178182	1.35133	0.434375	-1.37581	-0.460281	1.19432	0.256193	-1.08856	-0.122419	-1.29206	-0.369674	1.43003	0.516045	1.43892	0.524982	1.00621	0.00893784	Semaphorin-7A precursor	8482	Hs.24640
C096R093	0.00151703	0.562701	0.00562111	-1.42038	-0.50628	1.13045	0.1769	1.22916	0.29767	1.60568	0.68318	1.43843	0.524498	1.19235	0.253804	-1.21373	-0.279453	1.0966	0.133034	1.33098	0.412487	Retrovirus-related Pol polyprotein LINE-1
C117R093	0.000733466	0.0395892	0.140034	1.0786	0.109157	1.20645	0.270763	-1.15004	-0.201681	1.11853	0.161606	1.0901	0.124454	-1.17	-0.226511	1.35218	0.435292	1.18586	0.245932	-1.14026	-0.18936	mRNA turnover protein 4 homolog	51154	Hs.463797
C176R093	0.00505808	0.236481	0.606804	-1.26046	-0.333948	-1.13606	-0.184042	1.04821	0.0679302	1.1095	0.149906	1.16134	0.215788	-1.11424	-0.156059	-1.13768	-0.18609	-1.32687	-0.408032	-1.1663	-0.221941	UNKNOWN
C177R093	3.91124e-05	0.701425	0.459175	-1.1716	-0.228475	-1.11089	-0.151714	1.00431	0.00620719	1.05465	0.0767613	-1.05635	-0.0790937	-1.02799	-0.0398227	-1.24296	-0.313776	-1.1469	-0.197744	1.08375	0.116032	Transitional endoplasmic reticulum ATPase	507345	Bt.49331
C198R093	0.00963352	0.781529	0.114884	1.34495	0.427556	1.28774	0.364841	-1.08527	-0.118055	-1.04443	-0.0627153	-1.21018	-0.275216	-1.11578	-0.158054	1.20614	0.270396	1.25253	0.324843	1.03846	0.0544468	Pleckstrin homology domain-containing family A member 6	240753	Mm.253559
C255R093	0.00203019	0.674451	0.415463	1.34337	0.425861	1.15335	0.205824	-1.02148	-0.0306583	-1.16476	-0.220037	-1.12917	-0.175261	-1.01143	-0.0164027	1.21525	0.281258	1.1648	0.22008	-1.04332	-0.0611787	Transgelin-3	29114	Hs.169330
C258R093	0.00335136	0.725291	0.551033	1.19811	0.26076	1.70896	0.773119	-1.03029	-0.0430526	1.42638	0.512359	1.01994	0.0284801	1.29662	0.374759	1.25901	0.332292	2.283	1.19093	1.81333	0.858638	Lipocalin precursor
C001R094	0.00591773	0.388047	0.00841937	1.36581	0.449761	1.48051	0.566094	-1.0803	-0.111426	1.08398	0.116333	-1.25548	-0.328243	-1.39561	-0.480895	1.17523	0.232943	1.14601	0.196625	-1.02549	-0.0363182	UNKNOWN
C031R094	0.000304729	0.498984	0.000526445	-1.24064	-0.31108	-1.03022	-0.0429571	1.10677	0.146354	1.20424	0.268123	1.19716	0.259618	1.24907	0.320856	-1.14696	-0.197816	1.09547	0.131544	1.25646	0.32936	Cullin-associated NEDD8-dissociated protein 1	55832	Hs.546407
C045R094	0.00199044	0.0254941	0.332821	-1.1191	-0.162333	1.03399	0.0482261	1.32941	0.410781	1.15714	0.210559	1.04187	0.0591807	-1.1578	-0.211382	-1.42794	-0.513934	-1.48858	-0.573938	-1.04247	-0.060004	Mitochondrial 18 kDa protein	393659; 791606	Dr.16634
C054R094	7.3748e-05	0.531393	0.725738	-1.31539	-0.395491	-1.58528	-0.664739	1.03898	0.0551643	-1.20518	-0.269247	-1.08715	-0.120547	1.13362	0.180931	-1.48576	-0.571203	-1.45294	-0.538972	1.02259	0.0322309	Cyclin-dependent kinase 2-associated protein 1	8099	Hs.433201
C055R094	0.00355512	0.559902	0.587553	-1.24121	-0.31175	1.01691	0.024193	-1.1296	-0.175808	1.2622	0.335943	-1.05229	-0.0735267	1.06714	0.0937432	-1.15626	-0.209469	1.22582	0.293744	1.41737	0.503213	Protein transport protein Sec61 subunit alpha isoform A
C059R094	4.50717e-08	0.0942593	0.0725991	-1.31187	-0.391627	-1.29462	-0.372527	1.0426	0.0601909	1.01333	0.0191005	-1.19456	-0.256484	-1.15489	-0.207751	-1.63388	-0.708302	-1.55883	-0.640468	1.04814	0.0678342	Serine/threonine-protein kinase TAO3	395499	Gga.4360
C076R094	0.00997401	0.21456	0.540489	1.16576	0.221269	1.26442	0.338471	1.06951	0.0969489	1.08463	0.117202	-1.04734	-0.0667312	-1.09847	-0.135499	1.04073	0.0575891	1.07626	0.106023	1.03414	0.0484343	UNKNOWN
C085R094	0.00110546	0.700757	0.356965	1.14877	0.200092	1.32946	0.410836	-1.13908	-0.187871	1.15728	0.210744	-1.0815	-0.113036	1.0201	0.0287066	1.20993	0.274928	1.54479	0.627414	1.27676	0.352487	CKLF-like MARVEL transmembrane domain-containing protein 7	112616	Hs.440494
C095R094	0.0066924	0.806779	0.0472284	1.47188	0.557657	1.60119	0.679146	-1.15576	-0.20884	1.08786	0.12149	-1.33255	-0.414193	-1.28396	-0.360595	1.2766	0.352304	1.44132	0.527391	1.12903	0.175087	Riboflavin-binding protein precursor	396449	Gga.125
C105R094	5.23952e-05	0.500783	0.00231372	1.4035	0.489025	1.33991	0.42214	-1.20761	-0.272154	-1.04745	-0.0668853	-1.1506	-0.202388	-1.42414	-0.510093	1.47303	0.558791	1.13619	0.1842	-1.29647	-0.374591	Dehydrogenase/reductase SDR family member 1	52585	Mm.21623
C110R094	0.0057816	0.742426	0.0820951	-1.34728	-0.430051	-1.21182	-0.277177	1.07201	0.100323	1.11178	0.152874	1.19487	0.256848	1.137	0.185226	-1.20876	-0.273525	-1.14256	-0.192274	1.05794	0.0812516	High mobility group protein B3	3149	Hs.693708
C139R094	0.0086092	0.734855	2.14694e-05	-1.15029	-0.202004	1.18698	0.247292	1.6344	0.708758	1.36537	0.449296	1.45894	0.544916	1.73419	0.794259	-1.28864	-0.365845	1.25945	0.332794	1.62297	0.698639	Protein transport protein Sec24C	9632	Hs.654429
C192R094	0.00293255	0.99273	0.287239	-1.18728	-0.247659	-1.24921	-0.321011	1.0701	0.0977505	-1.05216	-0.0733521	1.05599	0.0785907	1.06	0.0840704	-1.20315	-0.266819	-1.26111	-0.334691	-1.04817	-0.0678723	E3 ubiquitin-protein ligase LNX	84708	Hs.655269
C201R094	0.000106177	0.838098	0.145956	1.35727	0.440712	1.08095	0.112305	-1.05533	-0.0776937	-1.25563	-0.328407	-1.07456	-0.103743	-1.16139	-0.215848	1.33299	0.414663	-1.01808	-0.0258502	-1.35709	-0.440513	UNKNOWN
C004R095	0.000808076	0.311078	0.00410853	1.08535	0.118164	1.18068	0.239616	-1.27738	-0.353192	1.08783	0.121452	-1.14209	-0.191682	-1.07066	-0.0984954	1.21392	0.279674	1.40865	0.494312	1.16041	0.214639	Translocator protein	24230	Rn.1820
C032R095	2.11695e-07	0.190437	0.258666	-1.44188	-0.527946	-1.2709	-0.345852	1.08464	0.117211	1.13453	0.182094	-1.13804	-0.186551	-1.19339	-0.25506	-1.77979	-0.831708	-1.64504	-0.718123	1.08191	0.113585	Isopentenyl-diphosphate Delta-isomerase 1
C049R095	0.000399385	0.26631	0.819329	-1.24903	-0.320812	-1.27951	-0.355592	1.19199	0.253378	-1.0244	-0.0347801	1.05447	0.0765162	-1.18951	-0.250373	-1.41193	-0.497674	-1.81421	-0.859343	-1.28491	-0.361669	Glycine receptor subunit alpha-2 precursor	2742	Hs.2700
C089R095	0.00014578	0.695212	0.113379	-1.5854	-0.664845	-1.01731	-0.024766	1.06113	0.0856034	1.55841	0.640079	1.23036	0.299077	1.16986	0.22634	-1.36734	-0.451372	1.0837	0.115971	1.48179	0.567343	RNA-binding protein Musashi homolog 2	124540	Hs.658922
C093R095	0.00162865	0.471896	1.1342e-05	1.48799	0.573361	1.36107	0.444746	-1.34241	-0.424828	-1.09324	-0.128615	-1.56069	-0.642188	-1.69688	-0.762886	1.27987	0.356	1.07675	0.106687	-1.18864	-0.249313	Ribosome biogenesis protein NSA2 homolog	10412	Hs.482526
C114R095	0.00855281	0.56297	6.58684e-05	1.15415	0.206836	1.19763	0.260179	-1.25582	-0.328633	1.03767	0.0533426	-1.1902	-0.251203	-1.37902	-0.463638	1.21779	0.284266	1.09064	0.125174	-1.11658	-0.159093	40S ribosomal protein S25	443521	Oar.1096
C115R095	7.19614e-09	0.828971	7.01033e-05	1.69296	0.759549	1.70767	0.772033	-1.26349	-0.337409	1.00869	0.0124844	-1.33744	-0.419472	-1.38017	-0.464847	1.59935	0.677486	1.5633	0.644595	-1.02306	-0.0328905	GTP cyclohydrolase 1 feedback regulatory protein	393735	Dr.82968
C198R095	0.00911948	0.237594	0.986969	-1.02222	-0.0317011	-1.19137	-0.252619	-1.02053	-0.0293209	-1.16548	-0.220918	1.16299	0.217835	-1.13583	-0.183751	1.16107	0.215454	-1.32597	-0.40705	-1.53955	-0.622504	Metabotropic glutamate receptor 8 precursor	60590	Rn.44420
C021R096	0.00188793	0.0152853	5.13149e-12	1.15571	0.208783	-1.01329	-0.0190508	2.6791	1.42175	-1.17108	-0.227834	5.78941	2.53342	6.09988	2.60878	2.49744	1.32045	2.24697	1.16798	-1.11147	-0.15247	Signal transducer and activator of transcription 1-alpha/beta	6772	Hs.699271
C057R096	0.00851555	0.0870376	2.93677e-11	1.15334	0.205815	1.09809	0.134998	2.33429	1.22299	-1.05031	-0.0708168	3.34025	1.73996	4.49132	2.16714	1.65036	0.722784	2.1128	1.07915	1.2802	0.356369	UNKNOWN
C063R096	0.000350185	0.64394	0.0155044	1.29073	0.368191	1.61977	0.695786	1.17054	0.22717	1.25492	0.327595	1.25642	0.329318	1.51785	0.602029	1.38543	0.470339	2.10037	1.07065	1.51604	0.600307	Beta-2-microglobulin precursor
C074R096	0.000119118	0.330834	0.271454	-1.39506	-0.480323	-1.50585	-0.590576	1.25195	0.324182	-1.07942	-0.110253	-1.07134	-0.099414	1.1989	0.261708	-1.87114	-0.903919	-1.57249	-0.65305	1.18992	0.250869	Chromosome-associated kinesin KIF4	394332	Xl.1232
C159R096	0.000858892	0.246762	0.367748	-1.20923	-0.274089	-1.32922	-0.410582	1.02828	0.0402354	-1.09923	-0.136492	-1.0666	-0.0930172	1.2141	0.279887	-1.32624	-0.407342	-1.12578	-0.17093	1.17806	0.236412	Uncharacterized protein C19orf22 homolog	614948	Bt.6058
C185R096	0.00783163	0.252205	1.77307e-05	1.34648	0.429196	1.21553	0.281591	-1.2269	-0.295017	-1.10773	-0.147605	-1.41342	-0.499186	-1.65052	-0.722921	1.1688	0.225028	-1.10674	-0.146312	-1.29355	-0.37134	Eukaryotic translation initiation factor 3 subunit K	515326	Bt.53466
C206R096	0.00124455	0.0238092	0.0342474	1.3035	0.382393	1.18932	0.250133	1.07102	0.0989801	-1.09601	-0.132261	-1.1032	-0.1417	-1.33512	-0.416967	1.10321	0.141713	-1.20231	-0.265814	-1.32641	-0.407527	118755 pfam10231, DUF2315, Uncharacterised conserved protein (DUF2315). This is a family of small conserved proteins found from worms to humans. The function is not known.
C235R096	0.00550644	0.733033	0.941206	1.14099	0.190286	1.00644	0.00926162	-1.02474	-0.0352528	-1.13369	-0.181024	-1.02898	-0.0412129	1.04578	0.0645802	1.13629	0.184326	1.07855	0.109095	-1.05353	-0.0752311	Neuron-specific protein family member 1	395251	Gga.39313
C237R096	0.00188746	0.246948	0.00278835	1.01234	0.0176969	-1.17971	-0.238431	-1.06136	-0.0859138	-1.19427	-0.256128	-1.20051	-0.263652	-1.34325	-0.425725	-1.11732	-0.160041	-1.49303	-0.578243	-1.33626	-0.418201	UNKNOWN
C028R097	0.00148754	0.5189	0.92664	-1.15764	-0.211192	-1.16443	-0.219622	1.07266	0.101188	-1.00586	-0.00843047	1.00303	0.0043681	-1.09178	-0.126681	-1.238	-0.308012	-1.36367	-0.447492	-1.10151	-0.13948	Sorting nexin-2	6643	Hs.696016
C048R097	0.000371265	0.159227	2.90446e-05	1.40477	0.490335	1.38509	0.469982	-1.14472	-0.195	-1.01421	-0.020353	-1.39304	-0.478236	-1.42339	-0.50933	1.15437	0.207099	1.11393	0.155652	-1.0363	-0.0514469	Transmembrane protein 50A	71817	Mm.88349
C083R097	0.00499174	0.872801	0.398273	1.14457	0.194803	1.4788	0.56443	1.11351	0.155114	1.29202	0.369626	1.02474	0.0352557	1.07419	0.103249	1.05332	0.0749451	1.42658	0.512565	1.35437	0.43762	Secretogranin-2 precursor	24765	Rn.45602
C084R097	0.000921257	0.0212305	0.588552	1.34287	0.425314	1.31277	0.392613	-1.19102	-0.252193	-1.02293	-0.0327017	-1.32502	-0.406017	1.93284	0.950719	1.20705	0.27149	3.02204	1.59552	2.50365	1.32403	Coronin-1A	11151	Hs.415067
C088R097	0.00405863	0.306881	0.0105117	1.40862	0.494286	1.2991	0.377517	-1.0572	-0.080255	-1.0843	-0.11677	-1.29108	-0.368581	-1.26814	-0.342716	1.15345	0.20596	1.08302	0.115056	-1.06504	-0.0909044	Cystatin precursor
C094R097	0.000683436	0.746867	0.02549	1.27656	0.352264	1.0707	0.0985535	-1.07156	-0.0997071	-1.19227	-0.25371	-1.14761	-0.198638	-1.15784	-0.211439	1.19196	0.253333	-1.00918	-0.0131781	-1.2029	-0.266511	BTB/POZ domain-containing protein KCTD17		Hs.517597
C120R097	0.00057151	0.473803	0.0291076	1.21048	0.275576	1.6504	0.722819	1.08865	0.122537	1.36343	0.447243	1.33087	0.412373	1.57085	0.651541	1.47981	0.565412	2.38142	1.25182	1.60928	0.686411	Beta-2-microglobulin precursor
C129R097	0.00014537	0.856196	0.000353644	-1.29127	-0.368793	1.0281	0.0399854	1.20528	0.269366	1.32756	0.408779	1.25889	0.332147	1.30194	0.380666	-1.23629	-0.306012	1.11056	0.151286	1.37297	0.457298	UNKNOWN
C140R097	0.000347085	0.459821	0.00210196	-1.33382	-0.415568	-1.2918	-0.369387	-1.21971	-0.286537	1.03253	0.0461804	-1.5194	-0.603506	-1.30831	-0.387705	-1.66156	-0.732537	-1.38564	-0.470555	1.19912	0.261981	Squalene monooxygenase	20775	Mm.218665; Mm.296169
C196R097	0.000229213	0.700264	0.0609823	1.29105	0.368549	1.16192	0.216516	-1.20543	-0.269551	-1.11113	-0.152033	-1.12593	-0.171116	-1.05678	-0.0796782	1.38222	0.466985	1.32536	0.406389	-1.0429	-0.0605958	Protein BCCIP homolog	444344	Xl.78605
C238R097	0.00158287	0.705726	0.00274691	-1.06925	-0.0965935	-1.27688	-0.352618	-1.13114	-0.177783	-1.19418	-0.256024	-1.21901	-0.285709	-1.26126	-0.334869	-1.1523	-0.204519	-1.42376	-0.509703	-1.23558	-0.305184	Acyl-CoA-binding protein	768330	Bt.46917
C015R098	0.00185913	0.323004	6.03242e-05	1.46582	0.551707	1.23242	0.3015	-1.21854	-0.285154	-1.18938	-0.250207	-1.4769	-0.562576	-1.54112	-0.623982	1.20939	0.274285	-1.02621	-0.0373277	-1.24109	-0.311613	ATP synthase subunit delta, mitochondrial precursor	66043	Mm.278560
C035R098	0.00110723	0.727862	0.0957909	1.05987	0.0838849	1.34399	0.426528	1.04879	0.068723	1.26808	0.342643	1.11684	0.159423	1.20176	0.265144	1.12864	0.174585	1.54002	0.622948	1.36449	0.448364	Sorting nexin-14		Hs.485871
C046R098	0.00132866	0.817627	0.24381	-1.07002	-0.0976329	1.09776	0.134565	1.01514	0.0216788	1.17462	0.232198	1.03339	0.0473897	1.07359	0.102446	-1.05112	-0.071922	1.16097	0.215332	1.22032	0.287254	NMDA receptor-regulated protein 1	80155	Hs.555985
C052R098	0.000155844	0.920905	0.00671365	-1.4768	-0.562475	-1.02449	-0.034908	1.23255	0.301645	1.4415	0.527567	1.25979	0.333179	1.34924	0.432152	-1.44487	-0.530941	1.06851	0.0955988	1.54386	0.62654	Ena/VASP-like protein	79115	Rn.28912
C146R098	0.00517052	0.717394	0.00444812	-1.06592	-0.0920978	1.14367	0.193665	1.15023	0.201919	1.21905	0.285763	1.13182	0.178638	1.26981	0.344616	-1.08326	-0.115378	1.26257	0.336362	1.36769	0.45174	Zinc finger BED domain-containing protein 5	612956	Cfa.1579
C149R098	0.000694159	0.0405676	0.0817289	1.54625	0.628771	1.14474	0.195025	-1.13263	-0.179679	-1.35074	-0.433746	-1.46218	-0.54812	1.11634	0.15878	1.19775	0.26033	1.44742	0.533484	1.20845	0.273154	Macrophage migration inhibitory factor	280858	Bt.15528
C198R098	0.00844886	0.991567	0.625675	1.19554	0.257658	1.11834	0.161364	1.02186	0.0311973	-1.06902	-0.0962932	1.01976	0.0282331	1.03798	0.0537798	1.19308	0.254693	1.13599	0.183947	-1.05026	-0.0707466	RING finger protein 121	55298	Hs.368554
C231R098	0.00440899	0.663663	0.00538403	-1.03805	-0.0538747	-1.29076	-0.368217	-1.2183	-0.284866	-1.24344	-0.314343	-1.13358	-0.180884	-1.32642	-0.407535	1.03534	0.0501078	-1.40531	-0.490887	-1.45498	-0.540995	Deoxyuridine 5'-triphosphate nucleotidohydrolase, mitochondrial precursor	1854	Hs.527980
C251R098	0.00276082	0.956592	0.0385468	1.25119	0.323302	2.26638	1.18039	-1.32344	-0.404291	1.81138	0.857088	-1.35332	-0.436499	-1.48858	-0.573935	1.22357	0.291094	2.01495	1.01075	1.64678	0.719652	Ig kappa chain V-IV region STH
C256R098	0.00933423	0.235589	0.63748	1.232	0.300998	1.34071	0.422998	1.14565	0.196173	1.08824	0.122	1.05998	0.084042	-1.12303	-0.1674	1.13987	0.188868	1.04205	0.0594256	-1.09387	-0.129442	UNKNOWN
C010R099	0.00643033	0.114697	0.168387	-1.11377	-0.15545	1.06491	0.090728	-1.07716	-0.107233	1.18606	0.246178	1.06497	0.0908078	1.31011	0.38969	1.02996	0.0425911	1.5028	0.587651	1.45908	0.54506	UNKNOWN
C034R099	0.00334527	0.0697034	0.0219524	1.11097	0.151826	1.20552	0.269656	1.15581	0.208908	1.0851	0.117831	-1.0388	-0.0549122	1.37704	0.46157	-1.08072	-0.111994	1.43626	0.522319	1.5522	0.634313	Probable ATP-dependent RNA helicase DDX49	54555	Hs.143187
C038R099	0.000240825	0.148626	0.366987	-1.18409	-0.243774	-1.08014	-0.111214	1.16154	0.216043	1.09624	0.132561	-1.09372	-0.129247	1.11359	0.155212	-1.50427	-0.589064	-1.12665	-0.172044	1.33517	0.41702	Thymosin beta	100002634; 402820	Dr.119962; Dr.81294
C060R099	4.1507e-05	0.426519	0.661114	1.4932	0.578408	2.27574	1.18634	1.18692	0.247222	1.52407	0.607928	-1.12365	-0.168198	1.09547	0.131552	1.1196	0.162989	2.1004	1.07067	1.87602	0.907677	Homeobox protein orthopedia B	30316	Dr.81295
C095R099	0.000452499	0.0329285	0.000222093	1.96884	0.977345	1.83512	0.875877	-1.25253	-0.324844	-1.07286	-0.101468	-2.23918	-1.16297	-1.39123	-0.47636	1.10131	0.139217	1.65217	0.724362	1.50019	0.585144	Corticotropin-releasing factor-binding protein precursor	1393	Hs.115617
C161R099	0.00373317	0.170113	0.15302	-1.10277	-0.141127	-1.31347	-0.393384	1.33051	0.411982	-1.19107	-0.252257	-1.04916	-0.0692408	1.14916	0.200576	-1.53938	-0.62235	-1.52076	-0.60479	1.01225	0.0175604	Cyclin-dependent kinase 2-associated protein 1	8099	Hs.433201
C208R099	0.00278981	0.747147	0.221812	-1.37379	-0.458156	-1.11462	-0.156554	1.12294	0.167277	1.23251	0.301602	1.17772	0.235999	1.00805	0.0115609	-1.30988	-0.389434	-1.24166	-0.31227	1.05494	0.0771638	THO complex subunit 5 homolog	325064	Dr.2250
C227R099	0.00494429	0.879211	0.000465443	1.39907	0.484465	1.08811	0.121818	-1.32872	-0.410034	-1.28578	-0.362648	-1.44687	-0.532939	-1.40525	-0.490824	1.28481	0.36156	1.02885	0.0410275	-1.24879	-0.320532	Procollagen-lysine,2-oxoglutarate 5-dioxygenase 1 precursor	116552	Rn.4445
C236R099	0.00213957	0.428681	0.263578	-1.29013	-0.367518	-1.40073	-0.48618	-1.02708	-0.0385494	-1.08573	-0.118663	1.13139	0.178096	1.1119	0.153024	-1.11024	-0.150872	-1.22655	-0.294607	-1.10476	-0.143735	Protein HGV2
C249R099	0.00202744	0.118909	0.127737	-1.27873	-0.354707	-1.283	-0.359519	-1.04291	-0.0606176	-1.00334	-0.00481178	1.15159	0.203624	1.11357	0.155193	-1.06471	-0.0904658	-1.10474	-0.143708	-1.03759	-0.0532427	Acidic leucine-rich nuclear phosphoprotein 32 family member A	335907	Dr.20261
C254R099	0.000400423	0.0296104	0.0611834	1.35849	0.442007	-1.02407	-0.0343209	1.08107	0.112453	-1.3912	-0.476328	-1.2417	-0.312322	-1.19518	-0.257231	1.01202	0.0172319	-1.32318	-0.404006	-1.33908	-0.421238	Chloride intracellular channel protein 4
C006R100	0.000686216	0.488411	0.0505654	-1.11138	-0.152351	-1.25615	-0.329003	-1.02947	-0.0419029	-1.13026	-0.176652	-1.16342	-0.218368	-1.16504	-0.220375	-1.25598	-0.328816	-1.42156	-0.507475	-1.13183	-0.178659	Ufm1-conjugating enzyme 1	537221	Bt.7911
C011R100	0.00292892	0.0769663	0.0120567	1.36146	0.445159	1.18679	0.247067	1.01929	0.0275612	-1.14718	-0.198092	-1.17878	-0.237292	-1.43756	-0.523621	1.13312	0.180306	-1.23466	-0.304115	-1.39902	-0.484421	DNA-damage-inducible transcript 4 protein	378866	Dr.82488
C075R100	0.00210832	0.282389	0.0238668	1.43533	0.521387	2.38417	1.25349	-1.04324	-0.0610713	1.66105	0.732099	-1.51694	-0.601167	-1.57831	-0.65838	-1.01305	-0.0187085	1.5759	0.656178	1.59647	0.674886	Complement C1q subcomponent subunit B precursor	713	Hs.8986
C085R100	0.00689053	0.601754	0.9342	-1.22852	-0.296917	-1.09782	-0.13464	1.00525	0.00755256	1.11905	0.162277	1.06248	0.0874337	-1.08217	-0.113933	-1.16234	-0.217036	-1.19427	-0.256125	-1.02747	-0.0390892	WD repeat-containing protein 1	422842	Gga.2409
C134R100	0.00155017	0.258995	0.426832	-1.20453	-0.268469	-1.06349	-0.0888094	1.13169	0.178473	1.13262	0.17966	1.10245	0.140718	-1.10234	-0.140574	-1.23647	-0.306224	-1.32671	-0.407856	-1.07299	-0.101632	Iron-responsive element-binding protein 2	64831	Rn.10132
C164R100	3.45479e-05	0.183244	0.0787811	1.1691	0.225397	1.68499	0.752739	-1.00234	-0.00337303	1.44127	0.527342	1.07024	0.0979339	1.70496	0.769738	1.25414	0.326704	2.87956	1.52585	2.29604	1.19915	HLA class II histocompatibility antigen gamma chain	972	Hs.694723
C203R100	0.0084717	0.764475	0.0368997	1.13689	0.185094	1.16657	0.222279	1.08971	0.123944	1.02611	0.0371845	1.17447	0.23201	1.10291	0.14132	1.22532	0.29316	1.18071	0.239655	-1.03778	-0.053505	U3 small nucleolar RNA-associated protein 14 homolog A	10813	Hs.458598
C215R100	0.00811018	0.859683	0.723206	1.25428	0.326863	1.09764	0.13441	-1.04347	-0.061395	-1.1427	-0.192452	-1.06143	-0.0860079	1.03365	0.0477523	1.23307	0.30225	1.18391	0.243558	-1.04152	-0.0586919	Transmembrane protein 106B	312132	Rn.106000
C265R100	0.00195965	0.753911	0.0363341	1.39411	0.479344	1.20458	0.268535	-1.19058	-0.251664	-1.15734	-0.210809	-1.27294	-0.348162	-1.09561	-0.131739	1.30391	0.382846	1.30899	0.388459	1.0039	0.00561367	NFU1 iron-sulfur cluster scaffold homolog	56748	Mm.23809
C005R101	0.00164831	0.633999	0.000380824	1.31642	0.39662	-1.09173	-0.126611	-1.5657	-0.646805	-1.43717	-0.523231	-1.34855	-0.431414	-1.7334	-0.793608	1.52839	0.612011	-1.20866	-0.273414	-1.84731	-0.885424	Acetyl-CoA acetyltransferase, mitochondrial precursor	38	Hs.232375
C014R101	0.00653825	0.677294	0.0554517	1.30712	0.386388	1.23228	0.301329	-1.06135	-0.0859015	-1.06073	-0.0850594	-1.18307	-0.242532	-1.15947	-0.213461	1.17264	0.229757	1.128	0.173769	-1.03957	-0.0559878	Fasciculation and elongation protein zeta-1	9638	Hs.224008
C038R101	0.00843402	0.562738	0.0934231	-1.15063	-0.202418	-1.16982	-0.226281	1.1267	0.17211	-1.01668	-0.0238623	1.01932	0.027614	1.1726	0.229709	-1.27184	-0.346914	-1.12403	-0.168681	1.1315	0.178233	Tubulin beta-1 chain
C061R101	0.00380424	0.117293	1.60043e-05	1.44335	0.529421	1.29657	0.374698	-1.18589	-0.245975	-1.11321	-0.154723	-1.55084	-0.63305	-1.45416	-0.540183	1.1037	0.142346	1.05738	0.0804895	-1.04381	-0.0618566	Eukaryotic translation initiation factor 3 subunit K	515326	Bt.53466
C103R101	0.00725741	0.0839898	7.29078e-07	1.48856	0.57392	2.16921	1.11717	-1.42468	-0.510643	1.45725	0.543249	-2.01339	-1.00962	-2.6299	-1.39501	1.05332	0.0749395	1.17512	0.232806	1.11564	0.157866	Down syndrome cell adhesion molecule precursor	1826	Hs.397800
C104R101	0.00686761	0.561638	0.00113944	1.20923	0.274087	1.16195	0.216544	-1.16114	-0.215547	-1.04069	-0.0575426	-1.26659	-0.340953	-1.13393	-0.181329	1.10856	0.148681	1.18984	0.250763	1.07332	0.102082	UNKNOWN
C115R101	0.00802204	0.319995	0.097848	-1.13865	-0.187322	-1.46284	-0.548777	-1.01194	-0.0171175	-1.28472	-0.361455	-1.15655	-0.209832	-1.89682	-0.92358	-1.30137	-0.380037	-2.74202	-1.45524	-2.10702	-1.0752	UNKNOWN
C129R101	8.19052e-05	0.822026	0.557979	1.49094	0.576222	1.48078	0.566353	-1.02039	-0.0291188	-1.00686	-0.00986838	-1.11299	-0.154443	-1.00998	-0.0143336	1.36689	0.450897	1.49603	0.581139	1.09448	0.130241	Peroxiredoxin-5, mitochondrial precursor	25824	Hs.502823
C132R101	0.000643413	0.722329	0.00294557	1.14386	0.193906	1.35199	0.435083	-1.22229	-0.28959	1.18196	0.241177	-1.28276	-0.359253	-1.13198	-0.178855	1.08994	0.124242	1.45985	0.545818	1.33939	0.421576	Replication factor C subunit 3	5983	Hs.115474
C192R101	0.00214731	0.775441	0.708488	1.27745	0.353269	1.18144	0.240548	1.07045	0.0982166	-1.08127	-0.112722	-1.00256	-0.00369154	-1.00488	-0.00702887	1.19033	0.251361	1.09832	0.135302	-1.08377	-0.116059	UNKNOWN
C222R101	0.00122581	0.134901	0.000278016	-1.50108	-0.586	-1.22745	-0.295665	1.10937	0.149739	1.22292	0.290335	1.41833	0.50419	1.5324	0.615797	-1.1741	-0.23155	1.12536	0.170392	1.32129	0.401942	Cell wall protein AWA1 precursor
C238R101	0.00414271	0.349886	0.819694	-1.12707	-0.172581	-1.25841	-0.331604	-1.01363	-0.019527	-1.11653	-0.159023	1.10221	0.140406	-1.13292	-0.180051	-1.00881	-0.0126487	-1.40652	-0.492128	-1.39424	-0.47948	UNKNOWN
C020R102	0.00341853	0.979346	0.359737	1.42045	0.506351	1.70318	0.768232	1.13949	0.188393	1.19904	0.261881	1.08623	0.119333	1.12307	0.167447	1.35406	0.437291	1.67863	0.747286	1.2397	0.309995	UNKNOWN
C026R102	1.35479e-05	0.342335	0.0922807	-1.47753	-0.563185	-1.2042	-0.268076	1.07639	0.106206	1.22698	0.295109	1.22816	0.2965	1.01337	0.0191567	-1.29495	-0.372891	-1.2791	-0.355125	1.01239	0.0177655	RNA-binding protein Musashi homolog 2	124540	Hs.658922
C088R102	0.00568956	0.287962	0.010494	-1.31555	-0.395664	-1.33125	-0.412776	1.11499	0.157028	-1.01193	-0.017112	1.11709	0.159749	1.51212	0.596575	-1.31307	-0.392943	1.01873	0.0267707	1.33766	0.419714	UNKNOWN
C102R102	0.0018358	0.481562	0.0521161	1.36912	0.453254	1.29477	0.372699	-1.10222	-0.140416	-1.05742	-0.0805546	-1.07504	-0.104393	-1.38792	-0.472921	1.40374	0.489277	1.02825	0.0401943	-1.36517	-0.449082	Nucleoside diphosphate kinase homolog 5	8382	Hs.519602
C108R102	0.00718197	0.570403	0.743861	1.23449	0.303916	1.30513	0.384197	1.07514	0.10452	1.05722	0.0802806	-1.05565	-0.0781322	1.04204	0.0594153	1.08769	0.121264	1.26496	0.339092	1.16298	0.217828	Coiled-coil domain-containing protein 82	79780	Hs.525088
C155R102	0.00202385	0.769689	0.00838437	1.21289	0.278449	-1.09622	-0.132538	-1.14304	-0.192881	-1.32959	-0.410987	-1.1881	-0.248653	-1.29983	-0.378326	1.1669	0.222677	-1.24659	-0.317983	-1.45464	-0.540659	Glutathione S-transferase kappa 1	76263	Mm.267014
C170R102	0.000276492	0.75644	1.28488e-06	1.41639	0.502223	1.20106	0.264311	-1.39522	-0.480495	-1.17928	-0.237912	-1.53376	-0.617074	-1.49386	-0.579041	1.28846	0.365643	1.12176	0.165764	-1.1486	-0.199879	Integral membrane protein 2B	395969	Gga.9467
C181R102	0.0089166	0.467861	0.000371759	1.35857	0.442089	1.14556	0.196051	-1.20455	-0.268495	-1.18595	-0.246038	-1.42336	-0.509299	-1.30213	-0.380872	1.14972	0.201285	1.05971	0.0836737	-1.08494	-0.117611	Acyl-CoA-binding domain-containing protein 7	414149	Hs.644598
C189R102	0.00383808	0.691802	0.0058786	1.25245	0.324751	1.08484	0.117479	-1.19948	-0.262404	-1.1545	-0.207272	-1.15176	-0.203845	-1.35082	-0.433839	1.30433	0.38331	-1.03811	-0.0539558	-1.35404	-0.437266	Eukaryotic translation initiation factor 3 subunit E	534165	Bt.48825
C193R102	0.00251471	0.133529	0.010483	-1.171	-0.227746	-1.18414	-0.243842	1.04675	0.0659157	-1.01122	-0.0160955	1.19876	0.261546	1.05699	0.0799654	-1.02251	-0.0321162	-1.17267	-0.229792	-1.14685	-0.197676	Splicing factor, arginine/serine-rich 7	6432	Hs.309090
C010R103	0.00890917	0.050967	0.0142709	1.04081	0.0577115	-1.16188	-0.216459	-1.0024	-0.00345707	-1.2093	-0.274171	-1.28694	-0.363944	-1.13132	-0.178006	-1.23352	-0.302775	-1.31131	-0.391009	-1.06307	-0.0882332	Acyl-CoA-binding protein	768330	Bt.46917
C151R103	4.67699e-05	0.702815	0.0019637	1.4599	0.545866	1.81762	0.862049	1.31886	0.399289	1.24503	0.316183	1.36806	0.452126	1.67156	0.741195	1.51435	0.598703	2.3037	1.20395	1.52124	0.605251	Beta-2-microglobulin precursor
C197R103	0.0015779	0.690276	0.350206	1.50741	0.592073	1.98799	0.991312	1.08761	0.121165	1.31881	0.399239	1.00347	0.00499044	1.4429	0.528974	1.39078	0.475899	2.63741	1.39912	1.89635	0.923222	UNKNOWN
C251R103	0.000462414	0.298099	0.00199594	1.40886	0.494525	2.61938	1.38923	-1.30466	-0.383679	1.85923	0.894702	-2.08419	-1.05949	-1.63831	-0.71221	-1.13389	-0.181285	2.08594	1.0607	2.36523	1.24198	Xanthine dehydrogenase/oxidase	396025	Gga.43173
C031R104	0.00552222	0.712415	0.012094	1.19377	0.255527	1.19293	0.254512	-1.07799	-0.108346	-1.0007	-0.00101531	-1.15744	-0.210939	-1.13874	-0.187434	1.11183	0.152934	1.1293	0.175425	1.01571	0.0224904	RING finger protein 13	396303	Gga.3523
C079R104	0.00707779	0.273939	0.0148295	-1.15335	-0.205831	-1.04385	-0.0619174	-1.03602	-0.0510517	1.1049	0.143913	-1.27535	-0.350888	-1.32557	-0.406611	-1.41978	-0.505667	-1.33559	-0.417476	1.06304	0.0881907	UNKNOWN
C108R104	0.00262292	0.255929	0.000416248	1.20552	0.269653	1.19067	0.251775	-1.12501	-0.169935	-1.01247	-0.017878	-1.13742	-0.185762	-1.37395	-0.458333	1.19236	0.253825	-1.02571	-0.0366231	-1.22302	-0.290449	LITAF-like protein	510242	Bt.9310
C119R104	0.00479493	0.692002	0.0166154	1.20889	0.273683	1.36139	0.445081	-1.0982	-0.135147	1.12615	0.171398	-1.13817	-0.18671	-1.257	-0.329988	1.16645	0.222121	1.18941	0.250241	1.01968	0.0281198	UNKNOWN
C134R104	0.00205803	0.138622	0.0870995	1.06259	0.0875799	1.17457	0.232132	-1.19394	-0.255736	1.10539	0.144552	1.0197	0.028139	-1.10014	-0.137693	1.29366	0.371455	1.27471	0.350174	-1.01486	-0.0212808	Uncharacterized protein C9orf25 homolog	445197	Dr.86268
C137R104	0.000182829	0.236023	0.931376	1.2154	0.281432	1.93816	0.954687	-1.3855	-0.470404	1.59467	0.673255	1.12768	0.173356	1.27806	0.353951	1.89894	0.925193	3.43198	1.77904	1.80732	0.85385	60S acidic ribosomal protein P2	100034001	Eca.137
C149R104	0.000202518	0.454389	0.893772	1.54729	0.629747	1.13413	0.181591	-1.03906	-0.0552769	-1.3643	-0.448156	-1.14137	-0.190771	1.14794	0.199052	1.40859	0.494253	1.35277	0.43592	-1.04126	-0.0583332	Calcium and integrin-binding protein 1	10519	Hs.135471
C177R104	0.00372122	0.351988	0.00151529	-1.14157	-0.191014	-1.1973	-0.259789	-1.14278	-0.192547	-1.04883	-0.068775	-1.18007	-0.238868	-1.45896	-0.544938	-1.17881	-0.237335	-1.52857	-0.61218	-1.2967	-0.374845	UNKNOWN
C199R104	1.31877e-05	0.711591	0.991659	2.17854	1.12336	1.81258	0.858046	-1.01243	-0.0178285	-1.2019	-0.265318	-1.14125	-0.190613	1.16022	0.214396	1.93265	0.950579	2.12914	1.09027	1.10167	0.139691	Lysozyme g
C245R104	5.57061e-05	0.234668	0.383411	-1.21457	-0.280445	-1.6491	-0.721675	-1.17747	-0.235689	-1.35776	-0.44123	-1.06776	-0.0945839	1.0883	0.122071	-1.1014	-0.139339	-1.28691	-0.363914	-1.16843	-0.224575	Contactin-1a precursor		Dr.104287
C259R104	0.000354226	0.973907	0.00266583	1.58083	0.66068	1.33954	0.421738	-1.44191	-0.52798	-1.18013	-0.238941	-1.40858	-0.494243	-1.35529	-0.438597	1.61823	0.694417	1.42516	0.511121	-1.13548	-0.183296	Pentraxin fusion protein precursor		Xl.307
C232R105	0.00211761	0.641615	0.0942675	-1.14791	-0.199009	-1.17443	-0.231966	-1.02679	-0.0381411	-1.02311	-0.0329572	-1.11301	-0.154466	-1.14962	-0.201158	-1.2443	-0.315334	-1.31493	-0.394983	-1.05676	-0.0796494	UNKNOWN
C236R105	0.000448353	0.139241	3.74807e-05	-1.08586	-0.11884	-1.24603	-0.317335	-1.27433	-0.349742	-1.1475	-0.198495	-1.13093	-0.177513	-1.49908	-0.584075	1.0377	0.0533893	-1.46578	-0.551668	-1.52104	-0.605057	UNKNOWN
C265R105	5.73444e-06	0.84924	0.000216021	1.67527	0.744394	1.56701	0.648015	-1.39826	-0.48363	-1.06909	-0.096379	-1.37475	-0.459172	-1.56283	-0.644162	1.70391	0.768853	1.402	0.487483	-1.21535	-0.281369	Otoraplin precursor	57329	Mm.157751
C032R106	0.000859476	0.164826	3.23109e-05	2.24557	1.16708	1.29791	0.376187	-1.83548	-0.876155	-1.73015	-0.790897	-2.81896	-1.49516	-1.50252	-0.58738	1.46214	0.548078	1.58553	0.664962	1.08439	0.116884	Complement component C7 precursor	507339	Bt.18557
C039R106	3.41317e-05	0.721813	0.00176701	1.30761	0.386931	2.60902	1.38351	-1.35756	-0.441018	1.99526	0.996579	-1.64872	-0.721344	-1.58991	-0.668941	1.07669	0.106605	2.22775	1.15559	2.06907	1.04898	Ig kappa chain V-IV region STH
C058R106	3.32309e-06	0.145293	0.132637	1.26066	0.334178	1.12298	0.167327	-1.04941	-0.0695853	-1.12261	-0.166851	1.07506	0.104413	1.21575	0.281847	1.42225	0.508176	1.43272	0.518759	1.00736	0.0105831	Syntabulin	319613	Mm.207715
C073R106	1.67151e-07	0.370426	0.704083	-1.89123	-0.919323	-1.79196	-0.841536	1.13874	0.187439	1.0554	0.0777862	1.01374	0.0196816	-1.30074	-0.379336	-2.12444	-1.08708	-2.65426	-1.40831	-1.2494	-0.321231	UNKNOWN
C075R106	0.000383182	0.675144	0.0421853	1.35204	0.435136	1.25015	0.322101	-1.22686	-0.294966	-1.0815	-0.113035	-1.08197	-0.113657	-1.25063	-0.322653	1.53309	0.616446	1.22639	0.294414	-1.25009	-0.322031	Non-receptor tyrosine-protein kinase TYK2	7297	Hs.75516
C144R106	0.00632572	0.504323	0.308201	-1.10671	-0.146284	-1.10554	-0.144751	1.02284	0.0325759	1.00106	0.00153242	-1.07664	-0.10653	-1.1001	-0.137635	-1.21874	-0.285389	-1.24398	-0.314962	-1.02071	-0.0295727	Protein FAM45A	404636	Hs.434241
C182R106	0.000899339	0.91676	0.814354	1.74458	0.802879	1.80907	0.855251	1.03638	0.0515477	1.03697	0.0523728	-1.02086	-0.0297802	-1.11601	-0.158344	1.64895	0.72155	1.56413	0.645359	-1.05423	-0.0761912	Lysozyme g
C228R106	0.000521521	0.535487	0.000925847	-1.20197	-0.265396	-1.21824	-0.284803	-1.15495	-0.207834	-1.01354	-0.0194063	-1.16199	-0.216599	-1.34109	-0.423401	-1.20929	-0.274162	-1.41458	-0.50037	-1.16976	-0.226208	Protein RCC2 homolog	406455	Dr.828
C241R106	0.00210594	0.297794	0.151982	-1.28942	-0.366717	-1.17925	-0.237871	-1.01471	-0.0210708	1.09342	0.128846	1.04369	0.0616956	1.26224	0.335988	-1.21752	-0.28395	1.08612	0.119188	1.32238	0.403138	Zinc fingers and homeoboxes protein 2
C243R106	0.00100667	0.0108768	0.000617529	-1.00631	-0.00907272	1.41272	0.498472	-1.01301	-0.0186424	1.42163	0.507544	2.53066	1.33952	2.27327	1.18477	2.54751	1.34909	3.25325	1.70188	1.27703	0.352798	Proteasome subunit beta type-6 precursor	510069	Bt.2116
C009R107	0.00631104	0.154335	0.0459271	-1.22284	-0.290232	1.08602	0.119047	-1.02507	-0.0357166	1.32802	0.409279	1.22727	0.295454	1.23176	0.300721	1.02878	0.040938	1.37124	0.455484	1.33288	0.414546	Probable RNA-directed DNA polymerase from transposon BS
C017R107	0.00702436	0.894506	0.15366	1.15788	0.211489	1.32672	0.40786	1.0725	0.100976	1.14581	0.196371	1.14926	0.200705	1.11762	0.160428	1.24075	0.311218	1.38253	0.467312	1.11427	0.156094	NF-kappa-B inhibitor alpha		Mm.170515
C047R107	0.00224806	0.0553301	0.648655	1.53618	0.619348	1.41423	0.500021	1.08103	0.112403	-1.08623	-0.119327	-1.33742	-0.419453	1.10789	0.147816	1.06252	0.0874914	1.44938	0.535434	1.36409	0.447943	Proto-oncogene tyrosine-protein kinase LCK		Gga.11320
C055R107	0.0065946	0.829891	0.0904947	1.24125	0.311796	1.53116	0.61462	1.22875	0.297196	1.23356	0.302825	1.17198	0.228942	1.07467	0.103895	1.1839	0.243542	1.33915	0.421319	1.13114	0.177777	DENN domain-containing protein 2D	79961	Hs.557850
C110R107	0.00920626	0.602379	0.000158136	1.36327	0.447073	1.17343	0.230726	-1.31822	-0.398588	-1.16179	-0.216347	-1.5089	-0.593501	-1.30444	-0.383427	1.19099	0.25216	1.18582	0.245887	-1.00436	-0.00627266	Syntaxin-binding protein 6		Mm.285400
C138R107	0.00120926	0.125481	0.0299365	-1.39866	-0.484046	1.0529	0.0743697	-1.00263	-0.00379249	1.47265	0.558415	1.16933	0.225682	1.92331	0.943589	-1.19298	-0.254571	2.03038	1.02175	2.42221	1.27632	Adenylosuccinate synthetase isozyme 1	122622	Hs.592327
C181R107	0.00663719	0.675711	0.841708	1.11446	0.156348	1.08835	0.122146	-1.05847	-0.0819855	-1.02399	-0.0342018	1.00171	0.00246675	1.03021	0.0429399	1.18165	0.2408	1.1868	0.247071	1.00436	0.0062713	SAFB-like transcription modulator	79811	Hs.512932
C196R107	0.00122991	0.458818	0.00921667	1.34416	0.426702	1.08895	0.122937	-1.08381	-0.116106	-1.23436	-0.303764	-1.19444	-0.256335	-1.34494	-0.427544	1.21965	0.286472	-1.13958	-0.188501	-1.38989	-0.474973	UNKNOWN
C221R107	0.000840034	0.113585	0.00528484	-1.15254	-0.204817	-1.33692	-0.418911	-1.24049	-0.31091	-1.15997	-0.214093	-1.01795	-0.0256609	-1.48317	-0.568682	1.05733	0.0804321	-1.59846	-0.676682	-1.69011	-0.757114	60S ribosomal protein L23a	360572
C227R107	0.00469689	0.921937	0.890373	1.27208	0.347193	1.24325	0.314113	1.00241	0.00347832	-1.02319	-0.0330798	-1.02382	-0.0339606	1.05128	0.0721525	1.2395	0.309754	1.30386	0.382788	1.05193	0.0730333	UNKNOWN
C257R107	0.00952601	0.305691	0.132176	-1.48595	-0.571381	-1.51196	-0.596417	1.02112	0.0301516	-1.0175	-0.0250355	1.37688	0.461405	1.11152	0.152528	-1.102	-0.140128	-1.38899	-0.47404	-1.26043	-0.333912	Magnesium transporter protein 1 precursor	324944	Dr.78952
C068R108	0.000132594	0.193151	0.0618356	-1.22735	-0.295549	-1.25164	-0.323818	1.00522	0.00750568	-1.01979	-0.0282696	-1.29896	-0.377352	-1.17332	-0.230598	-1.60259	-0.680406	-1.47623	-0.561922	1.08559	0.118484	Isocitrate dehydrogenase [NADP] cytoplasmic	24479	Rn.3561
C083R108	8.59329e-06	0.419657	0.0146753	1.3789	0.463517	1.83132	0.872885	1.0988	0.135926	1.3281	0.409368	1.30888	0.388337	1.56451	0.645712	1.64254	0.715929	2.60751	1.38267	1.58748	0.666742	Beta-2-microglobulin precursor
C124R108	0.000845058	0.0160728	0.0240673	-1.33059	-0.412071	-1.21979	-0.286632	-1.002	-0.00287683	1.09084	0.12544	-1.02137	-0.0305097	1.88873	0.917415	-1.35633	-0.439704	1.5515	0.633661	2.10434	1.07336	T-cell differentiation antigen CD6 precursor		Hs.695959
C136R108	2.56462e-05	0.490643	0.0389406	1.3071	0.386367	1.23957	0.309845	-1.25229	-0.324572	-1.05447	-0.0765218	-1.13255	-0.179571	-1.0449	-0.0633663	1.4453	0.531368	1.48561	0.571051	1.02789	0.0396825	DnaJ homolog subfamily C member 12	619393	Rn.211982; Rn.9583
C156R108	0.000755716	0.625944	0.0123364	1.15237	0.204607	1.62526	0.700675	1.20579	0.269976	1.41036	0.496067	1.25456	0.32718	1.5901	0.669119	1.19898	0.261812	2.14328	1.09982	1.78758	0.838005	H-2 class II histocompatibility antigen gamma chain	16149	Mm.439737
C162R108	3.94065e-08	0.575002	0.681612	-1.5071	-0.591771	-1.57637	-0.656604	1.02635	0.0375249	-1.04596	-0.0648338	-1.11057	-0.151302	1.00034	0.000490665	-1.71784	-0.780597	-1.61736	-0.693639	1.06213	0.0869584	Interleukin-1 receptor-like 1 precursor	25556	Rn.10072
C194R108	0.000198954	0.147917	0.083916	1.32792	0.409168	1.48367	0.569171	-1.0024	-0.00346333	1.11729	0.160003	1.03543	0.0502287	1.72862	0.789618	1.37827	0.46286	2.57086	1.36225	1.86528	0.899392	C-C chemokine receptor type 3
C203R108	0.00996969	0.653654	0.572215	-1.21648	-0.282713	-1.21918	-0.285914	-1.03245	-0.0460726	-1.00222	-0.00320045	1.04242	0.0599431	1.08022	0.111327	-1.13029	-0.176698	-1.09317	-0.128514	1.03396	0.0481839	UNKNOWN
C236R108	0.00434824	0.596449	0.549725	1.21641	0.282627	2.17851	1.12334	-1.19733	-0.259827	1.79094	0.840715	1.11973	0.163146	-1.25419	-0.326758	1.63082	0.705599	2.07975	1.05641	1.27528	0.350811	60S acidic ribosomal protein P2	100034001	Eca.137
C250R108	0.00028109	0.42367	0.332363	1.34852	0.431375	1.54909	0.631417	-1.29944	-0.377887	1.14873	0.200041	-1.18858	-0.249242	1.12279	0.167088	1.47429	0.56002	2.26011	1.17639	1.53301	0.616371	Rho GTPase-activating protein 29	378998	Dr.85725
C024R109	0.00143359	0.139929	0.00560385	-1.17168	-0.228579	-1.20803	-0.272654	-1.14854	-0.1998	-1.03102	-0.0440748	-1.02065	-0.0294907	-1.31578	-0.395922	-1.04122	-0.0582698	-1.38393	-0.468775	-1.32915	-0.410506	Guanine nucleotide-binding protein G(I)/G(S)/G(O) subunit gamma-10 precursor	2790	Hs.534196; Hs.656890
C054R109	0.00381825	0.275693	0.000180606	1.18467	0.244486	1.05804	0.0813911	-1.30068	-0.379267	-1.11969	-0.163095	-1.3087	-0.388131	-1.07958	-0.110468	1.17741	0.235622	1.27473	0.350191	1.08265	0.114568	Eukaryotic translation initiation factor 3 subunit D	515226	Bt.23244
C079R109	0.000760901	0.929141	0.0518296	1.27857	0.354533	1.61544	0.691925	1.16137	0.215833	1.26347	0.337392	1.24578	0.317046	1.23711	0.306978	1.37149	0.455747	1.72079	0.783069	1.25468	0.327323	17-beta-hydroxysteroid dehydrogenase 14	282652	Bt.88264
C084R109	0.00384438	0.196131	0.000918033	1.465	0.550897	1.36208	0.445814	-1.17939	-0.238039	-1.07556	-0.105083	-1.54882	-0.631171	-1.25374	-0.32624	1.11556	0.157764	1.2813	0.357614	1.14858	0.199849	CD209 antigen-like protein E	170780	Mm.52281
C088R109	0.00490599	0.703698	0.0248816	-1.00268	-0.00385897	1.19741	0.259923	1.08567	0.118587	1.20062	0.263781	1.10562	0.144856	1.22163	0.288808	1.01565	0.0224101	1.34737	0.430144	1.3266	0.407734	Alcohol dehydrogenase [NADP+]
C106R109	0.000148334	0.394619	0.200335	1.38302	0.467817	1.02895	0.0411776	-1.03509	-0.0497562	-1.3441	-0.426639	-1.18137	-0.240463	-1.01193	-0.0171093	1.21176	0.27711	1.0525	0.0738245	-1.15132	-0.203285	Uncharacterized protein C2orf25, mitochondrial precursor	27249	Hs.5324
C211R109	0.000807529	0.597041	0.871068	-1.28754	-0.36462	-1.25954	-0.332891	1.03068	0.0436002	1.02224	0.0317286	1.08774	0.121337	-1.08743	-0.120929	-1.22	-0.286883	-1.41169	-0.49742	-1.15712	-0.210537	SET and MYND domain-containing protein 2	56950	Hs.66170
C229R109	0.00304691	0.0417836	0.0118375	-1.56906	-0.6499	-1.59342	-0.67213	-1.03298	-0.0468156	-1.01553	-0.0222293	1.17407	0.231513	1.87202	0.904597	-1.29376	-0.371571	1.21359	0.279283	1.5701	0.650854	Myosin-IXb		Hs.123198
C005R110	0.00522066	0.349115	0.00231531	-1.24548	-0.316707	-1.28322	-0.359773	1.10278	0.141147	-1.0303	-0.0430655	1.15655	0.209831	1.36857	0.452668	-1.18758	-0.248024	-1.03401	-0.0482519	1.14852	0.199772	Flavin-containing amine oxidase domain-containing protein 1	221656	Hs.484813
C022R110	0.000165794	0.0727285	0.819026	-1.46201	-0.547958	-2.05905	-1.04198	-1.0294	-0.041802	-1.40836	-0.494019	-1.35038	-0.433367	1.50302	0.587868	-1.91789	-0.939522	-1.33081	-0.412307	1.44115	0.527216	Condensin complex subunit 3	398088	Xl.445
C030R110	0.00382433	0.124551	0.00443226	-1.30284	-0.381665	1.01037	0.0148878	1.11789	0.160774	1.31636	0.396553	1.33672	0.418692	1.06278	0.0878473	-1.08956	-0.123747	-1.04105	-0.0580391	1.0466	0.065708	Transposable element Tcb1 transposase
C105R110	0.0001144	0.604076	0.02015	1.40498	0.490546	1.69288	0.759477	1.1517	0.20376	1.20491	0.268931	1.26001	0.333433	1.54247	0.625247	1.53711	0.620219	2.26728	1.18096	1.47503	0.560744	Beta-2-microglobulin precursor
C126R110	0.00879721	0.394601	0.595323	-1.01066	-0.0152907	1.27141	0.346425	-1.03476	-0.0492919	1.28495	0.361716	1.13358	0.180887	1.0032	0.00460796	1.16061	0.214889	1.3198	0.400325	1.13716	0.185436	Autophagy-related protein 3	336632	Dr.1496
C207R110	0.0010814	0.738656	0.010295	1.54583	0.62838	1.18571	0.245747	-1.17365	-0.230998	-1.30372	-0.382633	-1.31433	-0.394333	-1.38775	-0.472752	1.38036	0.465045	1.00277	0.00399277	-1.37655	-0.461052	Ribosome maturation protein SBDS	448365	Str.16646
C218R110	0.00976158	0.490471	0.485686	1.37253	0.456842	1.28658	0.363537	1.02278	0.0324969	-1.06681	-0.0933047	-1.06719	-0.0938236	1.29037	0.367782	1.25747	0.330521	1.62318	0.698822	1.29083	0.368301	Ceruloplasmin precursor	1356	Hs.558314
C226R110	0.000283902	0.0525532	0.00214965	-2.3537	-1.23493	-2.43083	-1.28145	1.01711	0.0244814	-1.03277	-0.0465156	1.59197	0.670818	2.44605	1.29046	-1.50378	-0.588594	-1.01078	-0.0154708	1.48774	0.573123	Paired box protein Pax[Zf-a]	30567	Dr.24244
C237R110	0.00444398	0.746038	0.00740054	-1.43309	-0.519127	-1.36166	-0.445363	1.24842	0.320108	1.05246	0.0737636	1.25058	0.322603	1.50452	0.589301	-1.43061	-0.516632	-1.12988	-0.176169	1.26616	0.340462	Stathmin-2	20257	Mm.29580
C052R111	0.00500303	0.459812	0.0564721	-1.32457	-0.405525	-1.21995	-0.286819	1.06692	0.0934549	1.08576	0.118705	1.0867	0.119954	1.36346	0.447272	-1.30046	-0.379025	1.04753	0.0669977	1.36228	0.446023	Actin-related protein 2-A	406820	Dr.76576
C060R111	0.000121227	0.204354	0.00333145	1.54112	0.623977	1.37885	0.463463	-1.08992	-0.124219	-1.11769	-0.160514	-1.38266	-0.467442	-1.23309	-0.302282	1.21483	0.280755	1.21875	0.2854	1.00323	0.00464541	Neurabin-1	55607	Hs.21816
C062R111	0.000187781	0.189548	3.30023e-05	1.32995	0.411377	1.26384	0.33781	1.26523	0.339403	-1.05231	-0.0735664	1.65127	0.72358	1.93372	0.951376	1.73574	0.795554	1.93158	0.949783	1.11283	0.154229	Choline transporter-like protein 2	57153	Hs.631631
C067R111	0.00668234	0.222412	0.00223941	-1.45204	-0.538085	-1.45779	-0.543779	1.09668	0.133146	-1.00395	-0.00569397	1.30959	0.389112	1.5962	0.674637	-1.21598	-0.282119	-1.00159	-0.0022876	1.21405	0.279831	Myelin basic protein	4155	Hs.551713
C130R111	0.004175	0.324621	0.948159	-1.03929	-0.0556037	1.24499	0.31613	-1.15747	-0.210973	1.29391	0.371734	-1.04469	-0.0630692	1.23018	0.298869	1.06607	0.0923003	1.77273	0.825973	1.66287	0.733672	UNKNOWN
C171R111	0.00336998	0.640177	0.455205	-1.24852	-0.32022	-1.53494	-0.618183	-1.14325	-0.19314	-1.22941	-0.297963	1.02078	0.0296782	-1.07294	-0.101567	-1.06984	-0.0974017	-1.44054	-0.52661	-1.34649	-0.429208	Bleomycin hydrolase	395996	Gga.4171
C179R111	0.000206269	0.0259539	6.8184e-07	1.63634	0.710472	1.30866	0.388093	-1.47823	-0.563875	-1.25039	-0.32238	-2.07954	-1.05627	-1.2947	-0.372619	1.16318	0.21808	1.49418	0.579349	1.28456	0.361269	CD9 antigen	24936	Rn.2091
C235R111	2.88979e-05	0.826966	1.96257e-06	1.92537	0.945136	1.38913	0.474185	-1.828	-0.87027	-1.38602	-0.470952	-1.90516	-0.929914	-2.20261	-1.13921	1.84739	0.885492	1.15288	0.205242	-1.60242	-0.68025	Intermediate filament protein ON3
C259R111	0.00110777	0.691337	0.648448	1.34459	0.427171	1.53365	0.616965	1.04515	0.0637116	1.1406	0.189794	-1.02245	-0.0320279	-1.13418	-0.181648	1.25826	0.331432	1.29379	0.371606	1.02824	0.0401737	Krueppel-like factor 2	16598	Mm.26938
C032R112	0.00221808	0.564517	0.000375577	1.31263	0.392461	1.29299	0.370706	-1.17408	-0.231528	-1.01519	-0.0217548	-1.32741	-0.408609	-1.29193	-0.36953	1.16101	0.21538	1.17504	0.232705	1.01208	0.0173246	Transmembrane protein 50A	71817	Mm.88349
C102R112	0.000324076	0.154352	0.00633109	-1.2694	-0.344145	-1.21812	-0.284652	-1.03447	-0.0488963	1.0421	0.0594925	-1.40458	-0.490136	-1.53932	-0.622292	-1.72355	-0.785384	-1.81258	-0.858048	-1.05166	-0.072664	7-dehydrocholesterol reductase	394844	Str.43032
C147R112	0.00315641	0.785279	0.0423599	1.3383	0.420405	1.68124	0.749527	-1.15179	-0.203878	1.25625	0.329122	-1.17791	-0.236231	-1.37265	-0.456962	1.30863	0.388052	1.41073	0.496444	1.07803	0.108392	Glutaminyl-peptide cyclotransferase precursor	25797	Hs.79033
C031R113	0.00125518	0.144697	0.0582456	1.04676	0.0659354	1.18007	0.238874	1.01233	0.0176781	1.12735	0.172938	1.17984	0.238594	1.05009	0.0705086	1.21997	0.286851	1.22409	0.291704	1.00337	0.00485298	Transcription factor MafK	17135	Mm.157313
C052R113	0.00971174	0.0183007	0.299322	-1.83812	-0.878228	-1.79172	-0.841347	-1.41072	-0.496429	1.02589	0.0368809	-1.04253	-0.060095	2.37336	1.24693	-1.35839	-0.441893	1.86867	0.902014	2.53838	1.34391	Trichohyalin		Hs.432416; Hs.553300
C129R113	0.00363933	0.360428	0.00586768	-1.48022	-0.565816	1.1549	0.207768	1.14331	0.19322	1.70951	0.773584	1.53176	0.615195	1.69691	0.762914	-1.10484	-0.143841	1.71411	0.777462	1.89383	0.921303	PiggyBac transposable element-derived protein 3	267004	Hs.654449
C132R113	0.00577034	0.128172	0.00136323	-1.48778	-0.573163	-1.20402	-0.267859	1.0769	0.106885	1.23568	0.305304	1.38411	0.468955	1.69305	0.759626	-1.15757	-0.211093	1.30575	0.384882	1.51149	0.595976	Zinc finger protein 135	7694	Hs.85863
C139R113	0.0030034	0.694356	0.978926	1.15102	0.202915	1.25567	0.328463	-1.04199	-0.0593387	1.09092	0.125548	-1.04122	-0.0582749	1.0902	0.124596	1.15187	0.203978	1.42642	0.512398	1.23835	0.308419	UNKNOWN
C166R113	0.00495528	0.289635	0.00190553	1.61466	0.691232	1.64212	0.715558	-1.53618	-0.61935	1.017	0.0243264	-2.09955	-1.07008	-1.23845	-0.308539	1.1814	0.240499	2.03689	1.02637	1.72413	0.785871	Cathepsin S precursor	403400	Cfa.1661
C208R113	0.00628	0.0153635	4.8954e-11	1.03822	0.0541178	1.09011	0.124478	2.56691	1.36003	1.04998	0.0703601	6.15827	2.62252	5.90664	2.56234	2.4908	1.31661	2.50842	1.32678	1.00708	0.0101725	Interferon-induced guanylate-binding protein 1
C223R113	0.000213139	0.871628	0.000754745	2.26359	1.17861	1.55133	0.633501	-1.63322	-0.707719	-1.45913	-0.545111	-1.91891	-0.940285	-1.79429	-0.843415	1.92658	0.946045	1.41206	0.497805	-1.36437	-0.44824	Peroxiredoxin
C225R113	0.00617477	0.484936	0.867181	1.17569	0.233505	1.28582	0.362693	1.00371	0.00534317	1.09368	0.129188	1.12104	0.164832	-1.0882	-0.121948	1.31312	0.392994	1.17723	0.235402	-1.11542	-0.157591	Putative cation exchanger C521.04c	2543342
C252R113	0.00111682	0.10204	0.712522	-1.34152	-0.423863	-1.13929	-0.188132	1.08601	0.119031	1.1775	0.235731	1.20341	0.267124	-1.2157	-0.281783	-1.21064	-0.275771	-1.50415	-0.588946	-1.24244	-0.313175	ATP-binding cassette sub-family D member 3	25270	Rn.7024
C002R114	0.00662925	0.99916	0.091045	1.28476	0.361494	1.26285	0.336682	-1.13666	-0.184799	-1.01735	-0.0248113	-1.14318	-0.193056	-1.14331	-0.193211	1.27742	0.353236	1.25551	0.32827	-1.01746	-0.0249658	GTP-binding protein Rit1	6016	Hs.491234
C041R114	0.00205671	0.0383561	0.261555	2.35905	1.23821	1.18608	0.246206	1.04445	0.0627487	-1.98894	-0.992003	-1.84745	-0.885533	1.11364	0.155288	1.22258	0.289927	1.26466	0.338745	1.03442	0.0488185	Forkhead box protein C1		Mm.12949
C069R114	0.00193322	0.125108	0.331762	-1.10531	-0.144455	-1.10807	-0.148054	1.02718	0.0386931	-1.0025	-0.00359949	-1.19975	-0.262734	1.00268	0.00385446	-1.36215	-0.445882	-1.13516	-0.182893	1.19996	0.262989	Voltage-dependent anion-selective channel protein 2
C079R114	0.00283924	0.469917	0.163023	1.19944	0.26236	1.2447	0.315802	1.11106	0.151932	1.03774	0.0534421	-1.00444	-0.00639807	1.10493	0.14396	1.07477	0.104029	1.23784	0.30783	1.15173	0.2038	SLAIN motif-containing protein 1	122060	Hs.349955
C115R114	3.95296e-05	0.835589	0.00418188	1.65301	0.725098	1.63419	0.708575	-1.28963	-0.366955	-1.01152	-0.0165236	-1.28341	-0.359979	-1.48147	-0.567026	1.66102	0.732074	1.42257	0.508503	-1.16762	-0.22357	Peroxiredoxin
C117R114	0.00117162	0.48766	0.672264	-1.18109	-0.240113	-1.21661	-0.282868	1.02203	0.0314379	-1.03008	-0.0427545	1.03832	0.0542577	-1.13679	-0.18497	-1.16255	-0.217294	-1.4135	-0.499276	-1.21586	-0.281982	UNKNOWN
C140R114	0.00142017	0.207983	0.619351	1.60816	0.685408	1.29246	0.370116	1.09715	0.133762	-1.24426	-0.315291	-1.22214	-0.289408	-1.01362	-0.0195103	1.19934	0.262237	1.16219	0.216844	-1.03196	-0.0453935	Methionine adenosyltransferase 2 subunit beta	541347	Dr.77100
C024R115	0.00803522	0.126596	0.00103787	1.50615	0.590862	1.21922	0.285959	-1.08235	-0.114169	-1.23534	-0.304904	-1.46672	-0.552592	-1.4924	-0.577633	1.11145	0.152439	-1.13093	-0.177506	-1.25697	-0.329945	Elongation factor 1-beta	399326	Xl.41761
C045R115	0.00190984	0.14929	0.71277	1.2713	0.346309	1.39905	0.484445	-1.0216	-0.0308343	1.10048	0.138136	1.20564	0.269802	-1.30034	-0.378892	1.56585	0.646945	1.09915	0.136387	-1.4246	-0.510558	UNKNOWN
C049R115	0.00687686	0.500448	0.031012	1.2602	0.333648	1.37956	0.464208	1.26371	0.337666	1.09472	0.13056	1.12105	0.164852	1.07253	0.101024	1.11793	0.160834	1.17086	0.227566	1.04734	0.0667318	UNKNOWN
C050R115	0.00789761	0.186216	0.00170132	-1.30208	-0.380815	-1.04432	-0.062568	1.06668	0.0931219	1.24681	0.318247	1.30804	0.387404	1.32172	0.402418	-1.06182	-0.0865331	1.18651	0.246728	1.25986	0.333261	73156 cd01650, RT_nLTR_like, RT_nLTR: Non-LTR (long terminal repeat) retrotransposon and non-LTR retrovirus reverse transcriptase (RT). This subfamily contains both non-LTR retrotransposons and non-LTR retrovirus RTs. RTs catalyze the conversion of sin...
C090R115	0.00166142	0.119538	0.0616377	1.2414	0.311962	1.27697	0.352722	1.03341	0.0474059	1.02866	0.0407596	-1.10095	-0.138743	-1.18549	-0.245488	1.09112	0.125813	1.04234	0.0598276	-1.0468	-0.0659857	Gamma-aminobutyric acid receptor-associated protein-like 2	282531	Bt.41007
C093R115	3.03645e-06	0.748446	0.16729	1.38641	0.471357	2.43735	1.28531	1.08114	0.112551	1.75802	0.813955	1.12319	0.167608	1.37319	0.457527	1.44034	0.526414	3.09575	1.63029	2.14931	1.10387	H-2 class II histocompatibility antigen gamma chain		Rn.33804
C127R115	0.001974	0.0313468	0.0685267	1.56457	0.645764	4.42873	2.14689	1.19382	0.25558	2.83064	1.50113	-1.07817	-0.108584	-2.87744	-1.52479	1.21554	0.2816	1.28924	0.366525	1.06063	0.0849254	Ig kappa chain V-IV region STH
C140R115	0.00869579	0.337761	0.0926709	1.3109	0.390555	1.16149	0.215977	1.00694	0.00997692	-1.12863	-0.174578	-1.16471	-0.219973	-1.16406	-0.21917	1.11776	0.160605	-1.00917	-0.0131706	-1.12801	-0.173775	Vacuolar proton pump subunit E 1	529	Hs.517338
C165R115	0.00160083	0.45528	0.00809781	1.37083	0.455049	1.65366	0.725663	-1.11799	-0.160907	1.20632	0.270615	-1.22127	-0.28838	-1.47083	-0.55663	1.2549	0.327576	1.25696	0.329941	1.00164	0.00236449	FK506-binding protein 10 precursor	535310	Bt.2698
C198R115	0.00516329	0.777897	0.0126012	1.03532	0.0500823	-1.24696	-0.318413	1.25308	0.325482	-1.29101	-0.368495	1.24868	0.320409	1.10934	0.149697	1.03169	0.0450098	-1.40854	-0.494198	-1.45317	-0.539208	UNKNOWN
C210R115	1.72953e-05	0.0431996	1.46842e-05	2.82985	1.50072	1.8846	0.914258	-1.6046	-0.682216	-1.50156	-0.586467	-3.04974	-1.60869	-1.58111	-0.66094	1.48891	0.574255	1.9126	0.935535	1.28456	0.36128	Ependymin precursor
C043R116	0.00571992	0.237095	0.0579476	-1.28963	-0.366958	-1.18989	-0.250823	1.12373	0.168298	1.08383	0.116134	1.29568	0.373705	-1.00978	-0.0140361	-1.11849	-0.16155	-1.35018	-0.433157	-1.20715	-0.271607	Metabotropic glutamate receptor 8 precursor		Mm.320732
C047R116	0.00351989	0.539036	0.673757	-1.31917	-0.399628	-1.17819	-0.236569	1.0301	0.0427782	1.11966	0.163059	1.04677	0.0659449	-1.19045	-0.251511	-1.29815	-0.376462	-1.44479	-0.530858	-1.11296	-0.154397	Inhibitor of growth protein 4	418281	Gga.7799
C082R116	0.00573385	0.266727	0.241775	1.26016	0.333603	1.00307	0.0044286	1.06349	0.0888048	-1.25629	-0.329174	-1.09375	-0.129288	-1.22977	-0.298392	1.08336	0.11551	-1.30384	-0.382768	-1.41253	-0.498278	SEC23-interacting protein	11196	Hs.435004
C089R116	6.77095e-07	0.046582	0.000260225	1.65493	0.726769	1.78709	0.837612	-1.24632	-0.317673	1.07986	0.110844	-1.72096	-0.783217	-1.14827	-0.199467	1.1985	0.261225	1.93968	0.955818	1.61843	0.694594	60S ribosomal protein L18a
C099R116	0.00020299	0.21033	0.000359007	-1.38645	-0.471398	-1.13404	-0.181474	1.16527	0.220664	1.22258	0.289924	1.37567	0.460138	1.14957	0.201089	-1.1744	-0.231923	-1.14953	-0.201049	1.02163	0.0308742	Profilin-2	18645	Mm.271744
C105R116	0.00323885	0.381482	0.866504	1.29519	0.373161	1.45332	0.539353	1.13345	0.180725	1.12209	0.166191	1.00581	0.0083584	-1.10376	-0.142428	1.14933	0.200794	1.16167	0.216199	1.01073	0.0154042	Nucleolar protein 5A	67134	Mm.292497; Mm.29363
C125R116	0.000241853	0.308804	0.0381801	1.08186	0.113515	1.68311	0.751132	1.10537	0.144524	1.55576	0.637617	1.13536	0.183154	1.81156	0.857233	1.11122	0.152144	2.75842	1.46384	2.48233	1.3117	Coronin-1A	155151	Rn.6990
C126R116	0.000389062	0.728193	0.00779927	1.53243	0.615826	1.40802	0.49367	-1.18188	-0.241081	-1.08836	-0.122155	-1.34844	-0.431292	-1.26626	-0.340577	1.34314	0.425614	1.31419	0.394174	-1.02203	-0.0314401	Tetraspanin-14	52588	Mm.28876
C169R116	0.000850726	0.646001	0.247959	-1.35957	-0.443146	-1.24697	-0.318426	-1.08181	-0.11345	1.0903	0.12472	1.00082	0.00118229	-1.17214	-0.22914	-1.25572	-0.328513	-1.35108	-0.434115	-1.07594	-0.105602	SLAIN motif-containing protein-like	326023	Dr.18138
C189R116	0.00167633	0.625074	0.00536182	2.37013	1.24497	1.48738	0.572778	1.58806	0.667266	-1.59349	-0.672187	1.82165	0.865245	2.91374	1.54287	2.71875	1.44294	2.72902	1.44838	1.00378	0.00543988	UNKNOWN
C037R117	0.00575047	0.701608	0.0246235	1.35447	0.437733	1.02918	0.0414909	-1.21917	-0.285901	-1.31608	-0.396242	-1.30065	-0.379228	-1.09481	-0.130683	1.26963	0.344406	1.14608	0.196708	-1.1078	-0.147697	BCL2/adenovirus E1B 19 kDa protein-interacting protein 3	12176	Mm.378890
C059R117	0.00056303	0.747999	0.0136692	-1.23541	-0.304995	-1.13527	-0.183041	1.20803	0.272653	1.08821	0.121954	1.10694	0.146582	1.17505	0.232721	-1.34823	-0.431067	-1.16714	-0.222974	1.15516	0.208093	Dihydropyrimidinase-related protein 5	56896	Hs.299315
C064R117	4.80433e-06	0.212511	0.136295	1.86242	0.897177	1.36254	0.446296	-1.05296	-0.0744463	-1.36687	-0.450881	-1.35897	-0.442518	-1.00946	-0.0135776	1.44303	0.529105	1.42125	0.507164	-1.01532	-0.0219404	Peroxiredoxin-5, mitochondrial precursor	25824	Hs.502823
C096R117	0.00117333	0.100421	0.737344	1.21087	0.276039	1.33614	0.418074	1.08045	0.111638	1.10346	0.142036	1.05816	0.0815641	-1.19748	-0.259998	1.18589	0.245965	1.03271	0.0464382	-1.14832	-0.199527	Eukaryotic initiation factor 4A-II	395232	Gga.4580
C100R117	0.00181102	0.0191827	0.00108088	4.46293	2.15799	2.21207	1.14539	-1.20981	-0.274783	-2.01754	-1.0126	-4.40116	-2.13788	-1.93735	-0.954082	1.22679	0.294891	1.38137	0.466095	1.126	0.171205	Serotransferrin-1 precursor
C102R117	0.008099	0.0720109	0.127279	1.17582	0.233664	1.40938	0.49506	1.04856	0.0684031	1.19864	0.261396	-1.01732	-0.0247796	-1.29632	-0.374417	1.10227	0.140481	1.03687	0.0522391	-1.06307	-0.088242	UNKNOWN
C127R117	0.00159307	0.542948	0.0729853	1.12308	0.167462	1.53022	0.613736	1.22243	0.289757	1.36252	0.446274	1.03813	0.053981	1.29921	0.377634	-1.04849	-0.0683141	1.62632	0.701613	1.70518	0.769927	C-type natriuretic peptide 4 precursor	445907	Tru.1919
C152R117	0.000451025	0.0219101	0.00263007	1.65365	0.725657	-1.02114	-0.0301752	1.28709	0.364112	-1.68861	-0.755832	-1.03434	-0.0487065	1.76589	0.820392	1.24215	0.312839	1.3436	0.426104	1.08167	0.113266	NF-kappa-B inhibitor alpha		Gga.41891
C158R117	0.00283733	0.391953	0.203771	1.19999	0.263022	1.17104	0.227795	-1.00392	-0.00564453	-1.02472	-0.0352263	-1.01202	-0.0172322	-1.18097	-0.239971	1.19039	0.251434	-1.00454	-0.00653076	-1.19579	-0.257965	RNA-binding protein 45	129831	Hs.377257
C169R117	0.00417076	0.0225012	0.0344797	-1.03497	-0.0495924	1.09618	0.13249	-1.0588	-0.0824304	1.13452	0.182082	1.19605	0.258273	1.17166	0.228553	1.22358	0.291111	1.35987	0.443474	1.11139	0.152363	Elongator complex protein 4	550331	Dr.132775; Dr.79765
C180R117	0.0053693	0.986744	3.24857e-05	1.48199	0.567539	1.20635	0.270649	-1.66358	-0.734287	-1.22849	-0.29689	-1.69327	-0.759813	-1.74224	-0.800945	1.456	0.542013	1.15188	0.203991	-1.26402	-0.338022	Solute carrier family 22 member 7
C184R117	0.00953942	0.484296	1.34051e-05	-1.38075	-0.465449	-1.19384	-0.255609	1.35036	0.433346	1.15656	0.20984	1.52332	0.607216	1.73905	0.798302	-1.22398	-0.291579	1.07874	0.109347	1.32035	0.400926	Chromobox protein homolog 5	23468	Hs.632724
C198R117	0.00313493	0.0447678	0.895395	-1.17256	-0.229668	-1.22227	-0.289558	-1.0876	-0.121146	-1.04239	-0.0598903	1.10546	0.144643	-1.0308	-0.0437687	1.02535	0.0361208	-1.15844	-0.212181	-1.18781	-0.248302	Glycine cleavage system H protein, mitochondrial precursor	415803	Gga.3298
C243R117	0.00657446	0.588871	0.0100684	-1.18449	-0.244272	-1.09798	-0.134852	-1.15243	-0.204681	1.07879	0.10942	-1.3139	-0.393858	-1.15453	-0.207306	-1.35046	-0.433449	-1.09998	-0.137477	1.22771	0.295971	Nitrilase homolog 1	504199	Bt.96669
C254R117	0.000616774	0.426876	0.0293007	1.29435	0.372227	1.45465	0.540675	1.20718	0.271639	1.12385	0.168448	1.04406	0.0622044	1.31986	0.400389	1.11945	0.162792	1.59044	0.669425	1.42073	0.506633	UNKNOWN
C018R118	0.00300424	0.355982	0.0856004	1.14686	0.197683	1.35349	0.43668	1.0033	0.00475141	1.18017	0.238996	1.15579	0.208881	1.4807	0.566281	1.32117	0.401813	1.99752	0.998209	1.51194	0.596396	Fermitin family homolog 1	241639	Mm.209784
C023R118	0.00893441	0.38497	0.00160528	1.09932	0.136612	1.05953	0.0834236	-1.28237	-0.358809	-1.03756	-0.0531884	-1.12107	-0.164874	-1.15677	-0.210098	1.25749	0.330547	1.17457	0.232135	-1.07059	-0.0984127	Coatomer subunit zeta-1	22818	Hs.505652
C055R118	0.00452678	0.686631	0.0235247	1.19679	0.259173	1.15976	0.213831	-1.26201	-0.33572	-1.03193	-0.0453419	-1.1518	-0.203889	-1.10533	-0.144471	1.31131	0.391005	1.32416	0.40508	1.0098	0.0140756	Eukaryotic translation initiation factor 3 subunit D	515226	Bt.23244
C086R118	4.58317e-05	0.211434	0.0472531	-1.60036	-0.678394	-1.22182	-0.289027	1.14989	0.201491	1.30982	0.389367	1.37146	0.455709	-1.00809	-0.0116277	-1.34181	-0.424176	-1.41632	-0.502145	-1.05553	-0.0779695	UNKNOWN
C088R118	0.000783332	0.944168	0.867499	1.28048	0.356683	2.31013	1.20797	-1.02348	-0.0334876	1.80411	0.85129	1.08338	0.115534	1.01994	0.0284883	1.41982	0.505705	2.41153	1.26995	1.69848	0.764244	Proactivator polypeptide precursor	395602	Gga.4403
C120R118	0.00551459	0.937811	0.773042	-1.20083	-0.264035	-1.25363	-0.326107	-1.03336	-0.0473472	-1.04396	-0.0620715	-1.03485	-0.0494252	1.01698	0.0242939	-1.20256	-0.266113	-1.19289	-0.254465	1.00811	0.0116476	Protein PHS1	853348
C136R118	0.000565356	0.905183	7.1336e-06	-1.14068	-0.189893	1.14205	0.19163	1.34043	0.4227	1.30272	0.381523	1.29086	0.36833	1.36122	0.4449	-1.18449	-0.244262	1.15976	0.21383	1.37372	0.458093	PR domain zinc finger protein 2	7799	Hs.371823
C167R118	0.00301646	0.595917	0.265485	1.20349	0.26723	1.31228	0.392077	-1.19726	-0.259735	1.09039	0.124847	-1.14487	-0.195188	1.0394	0.0557524	1.25856	0.331777	1.63304	0.707564	1.29755	0.375787	Secretogranin-2 precursor	20254	Mm.5038
C255R118	4.16497e-06	0.534674	0.000115158	1.48297	0.568487	1.31516	0.395237	-1.56665	-0.647685	-1.1276	-0.17325	-1.36363	-0.44745	-1.2903	-0.367712	1.70376	0.768723	1.59683	0.675211	-1.06696	-0.0935121	Nascent polypeptide-associated complex subunit alpha, muscle-specific form	17938	Mm.3746
C028R119	0.00873612	0.170249	0.026202	-1.05252	-0.0738487	1.00009	0.000132259	1.17343	0.230732	1.05262	0.073981	1.01311	0.018787	1.09606	0.132322	-1.21908	-0.285794	-1.07049	-0.0982776	1.1388	0.187516	UNKNOWN
C029R119	0.000326312	0.738637	0.0114439	1.26587	0.34013	1.64409	0.717293	1.19961	0.262562	1.29879	0.377163	1.27485	0.350333	1.47678	0.562455	1.34527	0.427901	2.02397	1.01719	1.5045	0.589284	Beta-2-microglobulin precursor
C061R119	0.00085162	0.650421	2.54869e-05	1.27384	0.349186	1.26703	0.341455	-1.21253	-0.278023	-1.00537	-0.00773045	-1.29518	-0.373148	-1.36248	-0.446231	1.19256	0.25406	1.12759	0.173247	-1.05761	-0.0808132	60S ribosomal protein L4-A		Xl.8672
C072R119	0.000142848	0.914402	0.0567629	-1.29362	-0.371413	-1.07003	-0.0976571	1.07953	0.110401	1.20895	0.273755	1.12522	0.170201	1.09996	0.137453	-1.24109	-0.311613	-1.05016	-0.0706057	1.18182	0.241007	UNKNOWN
C109R119	0.0086693	0.268586	0.0215128	-1.00914	-0.0131294	-1.18751	-0.247942	-1.02061	-0.0294382	-1.17675	-0.234812	-1.21245	-0.277922	-1.35221	-0.435324	-1.19882	-0.261613	-1.57334	-0.653828	-1.31241	-0.392215	Uncharacterized protein C6orf166	55122	Hs.485915
C125R119	0.00331337	0.606637	0.899457	-1.27965	-0.355746	-1.17995	-0.238721	1.06825	0.0952478	1.0845	0.117025	1.07125	0.0992979	-1.11367	-0.155328	-1.27606	-0.351695	-1.40376	-0.489297	-1.10007	-0.137601	UNKNOWN
C129R119	0.0020074	0.594228	0.787671	-1.2216	-0.288773	-1.1908	-0.251927	-1.02777	-0.0395151	1.02587	0.0368456	-1.03077	-0.0437234	1.10435	0.143198	-1.22517	-0.292981	-1.04915	-0.0692143	1.16778	0.223767	UNKNOWN
C196R119	0.0033679	0.273476	0.00253064	1.47119	0.556986	1.1996	0.262559	-1.1384	-0.187006	-1.2264	-0.294427	-1.44035	-0.526419	-1.23917	-0.309371	1.16278	0.217573	1.10205	0.140194	-1.0551	-0.0773788	Fumarylacetoacetate hydrolase domain-containing protein 1	302980	Rn.3918
C200R119	0.0034158	0.923456	0.346767	-1.19076	-0.251878	-1.18341	-0.242955	1.07907	0.109791	1.0062	0.00892334	1.03201	0.0454636	1.05304	0.0745651	-1.24505	-0.316205	-1.21266	-0.278181	1.02671	0.0380249	Heterogeneous nuclear ribonucleoprotein A0	10949	Hs.645902; Hs.96996
C220R119	0.0072654	0.0693257	7.72004e-07	1.1483	0.199503	-1.00177	-0.00255007	1.54797	0.630381	-1.15033	-0.202053	2.829	1.50029	2.52268	1.33496	2.09858	1.06941	1.62679	0.702027	-1.29001	-0.367386	Proteasome subunit alpha type-6	29673	Rn.107278
C241R119	9.8992e-05	0.514763	0.296152	-1.14248	-0.192168	-1.37078	-0.454999	-1.08021	-0.111312	-1.19983	-0.262831	-1.0914	-0.126183	1.03434	0.0487075	-1.15432	-0.207039	-1.22687	-0.294979	-1.06285	-0.0879407	UNKNOWN
C028R120	0.00822953	0.122258	0.159664	1.35459	0.437852	1.29335	0.371113	1.08062	0.111866	-1.04735	-0.066739	-1.1356	-0.18346	-1.23064	-0.299408	1.10384	0.142526	-1.02823	-0.0401611	-1.135	-0.182687	UNKNOWN
C071R120	0.00233401	0.22782	2.43694e-06	1.62866	0.703682	1.22299	0.290413	-1.44732	-0.533383	-1.3317	-0.413269	-1.95994	-0.970809	-1.59981	-0.677897	1.20268	0.266256	1.10642	0.145899	-1.087	-0.120357	Extracellular superoxide dismutase [Cu-Zn] precursor	6649	Hs.2420
C111R120	0.00599686	0.935481	0.0834206	1.61101	0.687968	1.20561	0.269766	-1.21344	-0.279107	-1.33626	-0.418202	-1.32002	-0.400563	-1.21393	-0.279691	1.48094	0.566512	1.20512	0.269182	-1.22887	-0.297331	UNKNOWN
C122R120	0.00549073	0.107289	1.4317e-05	1.45675	0.542751	1.23632	0.306048	-1.37173	-0.455998	-1.1783	-0.236703	-1.805	-0.851999	-1.27382	-0.349167	1.10707	0.14675	1.33134	0.412879	1.20258	0.266129	CD9 antigen	24936	Rn.2091
C151R120	0.00950855	0.251242	0.25329	1.21344	0.2791	-1.01468	-0.021031	1.01348	0.0193174	-1.23126	-0.300131	-1.14245	-0.192133	-1.03226	-0.0457997	1.04801	0.0676501	-1.06153	-0.0861481	-1.11249	-0.153798	Nascent polypeptide-associated complex subunit alpha	513312	Bt.24178
C255R120	0.000306625	0.528906	0.00501897	1.12288	0.167207	-1.09659	-0.133027	-1.20311	-0.266772	-1.23134	-0.300234	-1.0856	-0.118497	-1.15231	-0.204533	1.24443	0.315482	-1.05029	-0.0707878	-1.30701	-0.38627	39S ribosomal protein L13, mitochondrial	28998	Hs.333823
C070R121	0.00345099	0.563037	0.0833703	4.17786	2.06276	3.63804	1.86316	-1.35836	-0.441868	-1.14838	-0.199602	-1.45667	-0.542673	-3.75651	-1.90939	3.8959	1.96196	1.31552	0.395636	-2.96149	-1.56632	High choriolytic enzyme 1 precursor
C072R121	0.00101757	0.496145	0.0244453	-1.47804	-0.563685	-1.31937	-0.399854	1.06404	0.0895467	1.12026	0.163831	1.23449	0.303921	1.2988	0.377179	-1.27395	-0.349311	-1.08089	-0.112222	1.17861	0.237088	UNKNOWN
C085R121	9.19814e-06	0.153537	0.00175666	1.49629	0.58139	1.64925	0.72181	-1.16845	-0.224595	1.10223	0.14042	-1.5023	-0.587173	-1.15585	-0.20895	1.16378	0.218812	1.66723	0.737455	1.43261	0.518643	Integral membrane protein 2B	395969	Gga.9467
C110R121	0.00594763	0.262279	0.234748	1.13439	0.181915	1.01869	0.0267205	-1.23221	-0.301251	-1.11357	-0.155194	-1.01839	-0.0262932	-1.00174	-0.00250416	1.37256	0.456873	1.25307	0.325468	-1.09536	-0.131405	Zinc finger protein 37A	7587	Hs.292575
C120R121	0.000448346	0.0757756	0.0201292	-1.3883	-0.473317	-1.30556	-0.384664	1.0813	0.112771	1.06338	0.0886532	1.36996	0.454136	1.02992	0.0425318	-1.09578	-0.131952	-1.37069	-0.454903	-1.25089	-0.322951	Serine/threonine-protein phosphatase 2B catalytic subunit alpha isoform	286852	Bt.3966
C125R121	0.000218599	0.95765	0.351995	1.40335	0.488874	1.31653	0.396744	-1.09922	-0.136482	-1.06594	-0.0921303	-1.08583	-0.118796	-1.03715	-0.0526283	1.42066	0.50656	1.39532	0.480597	-1.01816	-0.0259624	UNKNOWN
C154R121	0.000372062	0.601926	0.768766	-1.2326	-0.3017	-1.20919	-0.274042	1.09743	0.134133	1.01936	0.0276582	1.02076	0.0296489	-1.06275	-0.0878035	-1.32518	-0.406185	-1.41028	-0.495979	-1.06422	-0.0897942	RNA-binding protein 4B
C168R121	0.00890943	0.855019	0.163205	-1.30847	-0.387877	-1.25029	-0.322268	1.16121	0.215626	1.04653	0.065609	1.06797	0.0948778	1.20351	0.26725	-1.42269	-0.508626	-1.20635	-0.270644	1.17934	0.237982	Inorganic pyrophosphatase	280701	Bt.7870
C196R121	0.00819288	0.754026	0.642347	1.07607	0.105778	-1.10051	-0.138167	1.0067	0.0096392	-1.18423	-0.243945	1.00732	0.0105286	-1.08506	-0.117772	1.07674	0.106667	-1.20212	-0.265578	-1.29437	-0.372245	UNKNOWN
C244R121	0.00717124	0.222162	2.26068e-08	1.93788	0.954476	1.20067	0.263835	-2.10719	-1.07532	-1.614	-0.690641	-3.35818	-1.74768	-2.75692	-1.46306	1.21598	0.282118	-1.08968	-0.123904	-1.32503	-0.406022	Heme-binding protein 2	23593	Hs.486589
C247R121	0.00956955	0.0323175	0.00701918	1.57237	0.652937	1.26495	0.339077	-1.23287	-0.302016	-1.24303	-0.31386	-1.83151	-0.873031	1.00423	0.00608462	1.05843	0.081921	1.5661	0.647177	1.47965	0.565256	Annexin A5	428767	Gga.1168
C043R122	0.00278254	0.590748	0.00157995	1.24335	0.314237	1.28203	0.358427	-1.12666	-0.172058	1.0311	0.0441905	-1.25197	-0.324205	-1.21209	-0.277499	1.11891	0.16209	1.19167	0.252987	1.06503	0.0908967	UNKNOWN
C064R122	0.00812483	0.537988	0.00538462	3.24574	1.69855	1.3566	0.439994	2.36401	1.24123	-2.39255	-1.25855	1.57642	0.656656	3.57622	1.83843	2.1644	1.11397	2.05223	1.03719	-1.05466	-0.0767729	40S ribosomal protein S2
C074R122	0.000185705	0.08697	0.380357	1.49272	0.577939	1.1296	0.175812	-1.10007	-0.13759	-1.32146	-0.402127	-1.28333	-0.359892	1.17673	0.234783	1.27955	0.355637	1.46224	0.548184	1.14278	0.192547	BCL2/adenovirus E1B 19 kDa protein-interacting protein 3	12176	Mm.378890
C124R122	0.00076869	0.637759	0.292176	-1.12299	-0.167343	-1.31245	-0.392264	1.0035	0.00504479	-1.16871	-0.224922	-1.11213	-0.153326	-1.09166	-0.126525	-1.25328	-0.325713	-1.43777	-0.523834	-1.1472	-0.19812	Deoxyuridine 5'-triphosphate nucleotidohydrolase, mitochondrial precursor	1854	Hs.527980
C128R122	0.00463175	0.633116	0.0582075	-1.3538	-0.437017	-1.05126	-0.0721168	1.05724	0.0803092	1.28779	0.3649	1.20206	0.265512	1.21037	0.275445	-1.1907	-0.251814	1.08901	0.123019	1.29669	0.374833	Casein kinase I isoform gamma-1	53944	Hs.646508
C144R122	0.000234463	0.101139	0.237341	1.12121	0.165061	1.21817	0.284711	-1.27187	-0.346946	1.08647	0.11965	1.01698	0.024289	1.00236	0.00339547	1.45024	0.536296	1.55299	0.635053	1.07085	0.0987565	Bifunctional purine biosynthesis protein PURH	471	Hs.90280
C162R122	0.00241441	0.478652	7.92183e-06	1.33132	0.412853	1.25436	0.326946	-1.25918	-0.332481	-1.06135	-0.0859069	-1.44745	-0.533514	-1.39626	-0.481567	1.15815	0.211819	1.1312	0.177859	-1.02382	-0.0339597	60S ribosomal protein L4-A		Xl.8672
C224R122	0.00863779	0.151416	0.517947	-1.02003	-0.0286176	1.53832	0.621356	-1.58154	-0.661333	1.56914	0.649973	1.15483	0.207682	1.0138	0.0197682	1.79054	0.840398	2.46649	1.30246	1.37751	0.462059	60S acidic ribosomal protein P2	100034001	Eca.137
C011R123	0.00338083	0.242228	0.224274	1.43331	0.519352	1.51059	0.595111	1.05788	0.0811727	1.05392	0.075759	-1.04381	-0.0618632	-1.3856	-0.470512	1.29802	0.376316	1.03056	0.0434256	-1.25953	-0.33289	Inositol-3-phosphate synthase B	446618	Xl.29469
C014R123	0.00329533	0.25509	0.0231062	-1.38426	-0.469119	1.00424	0.00610074	1.06959	0.0970609	1.39013	0.47522	1.32784	0.409077	1.12453	0.169327	-1.11505	-0.157103	1.05582	0.0783668	1.17729	0.23547	Ephrin type-A receptor 3 precursor	30311	Dr.75760
C040R123	0.000287713	0.193522	0.0193178	-1.21714	-0.2835	-1.18446	-0.244227	-1.00838	-0.012038	1.0276	0.0392733	-1.1788	-0.237319	-1.38722	-0.472198	-1.42285	-0.508782	-1.62945	-0.704387	-1.1452	-0.195605	High mobility group protein B2	3148	Hs.434953
C071R123	0.00788601	0.0215638	0.0401908	-2.84787	-1.50988	-1.61975	-0.695768	-1.25211	-0.324367	1.75822	0.814114	2.12843	1.08979	1.75324	0.810021	-1.0686	-0.095723	1.35531	0.438619	1.44828	0.534342	Armadillo repeat-containing protein 1	74252	Mm.316007; Mm.434309
C089R123	0.0014281	0.324339	0.0144792	-1.40574	-0.491333	-1.16091	-0.215259	1.08863	0.122517	1.2109	0.276075	1.158	0.211637	1.51834	0.602494	-1.32153	-0.402214	1.2014	0.264718	1.58769	0.666932	Fatty acid synthase	14104	Mm.236443; Mm.465985
C102R123	0.00310099	0.198278	0.333684	-1.08354	-0.115759	-1.37173	-0.455995	1.18107	0.2401	-1.26596	-0.340236	-1.15958	-0.2136	-1.44661	-0.532674	-1.48397	-0.569459	-2.34367	-1.22877	-1.57933	-0.659309	Aspartate aminotransferase, mitochondrial precursor	14719	Mm.230169
C120R123	0.000504391	0.929236	0.651346	1.19821	0.260882	1.14968	0.201236	1.02004	0.0286277	-1.04221	-0.0596459	1.04128	0.058357	-1.00141	-0.00203533	1.22316	0.290611	1.12551	0.170573	-1.08676	-0.120038	AN1-type zinc finger protein 2B	363253	Rn.32162
C183R123	0.000258752	0.816707	0.24363	-1.36287	-0.446647	-1.65356	-0.725578	-1.16082	-0.215146	-1.2133	-0.278931	-1.12845	-0.174346	-1.01534	-0.0219638	-1.32487	-0.405846	-1.44633	-0.532395	-1.09168	-0.126549	Acyl-CoA synthetase short-chain family member 3, mitochondrial precursor	531552	Bt.23786
C196R123	0.00808055	0.964835	0.506737	1.37512	0.459555	1.19922	0.262097	-1.0624	-0.0873315	-1.14668	-0.197458	-1.09514	-0.131111	-1.03035	-0.0431338	1.33402	0.415776	1.23653	0.306295	-1.07884	-0.109481	Keratin, type I cytoskeletal 18
C236R123	0.000612578	0.320668	0.000517061	-1.33742	-0.41945	-1.47518	-0.560891	-1.30353	-0.382428	-1.10301	-0.141442	-1.38802	-0.47303	-2.02595	-1.0186	-1.4241	-0.510051	-2.29272	-1.19706	-1.60994	-0.687007	Homeobox protein Hox-B6a	30341	Dr.132967
C012R124	0.000848809	0.677202	0.0691506	-1.13096	-0.177545	-1.24437	-0.31542	-1.05057	-0.0711673	-1.10028	-0.137874	-1.07467	-0.103896	-1.18323	-0.242728	-1.15691	-0.210274	-1.40151	-0.48698	-1.21143	-0.276706	Histone H3.3	117056	Rn.124815; Rn.198918; Rn.29857
C129R124	0.0045953	0.549653	4.28945e-09	1.3013	0.379958	1.72374	0.785539	3.14982	1.65527	1.32462	0.405581	4.29034	2.10109	4.74644	2.24684	1.77249	0.825781	2.59748	1.37711	1.46544	0.551332	Proteasome subunit beta type-7 precursor	85492	Rn.3846
C146R124	0.00900274	0.295146	1.46618e-10	1.3718	0.456074	1.19858	0.261323	3.60502	1.85001	-1.14453	-0.194751	5.63909	2.49546	6.53679	2.70858	2.14582	1.10153	2.17332	1.1199	1.01281	0.018369	Opioid growth factor receptor		Mm.250418
C160R124	0.000131923	0.0216842	9.79588e-05	1.54161	0.624441	1.46282	0.548752	-1.12628	-0.171559	-1.05386	-0.0756889	-1.24717	-0.31866	-2.06543	-1.04644	1.39217	0.477339	-1.25365	-0.32613	-1.74529	-0.803469	Repressor of RNA polymerase III transcription MAF1 homolog	406750; 554572	Dr.77656
C197R124	0.0013701	0.203572	0.0500913	1.11812	0.161076	1.02059	0.029403	-1.22352	-0.291034	-1.09556	-0.131673	-1.02523	-0.0359473	-1.07524	-0.104661	1.33437	0.416163	1.16133	0.215775	-1.14901	-0.200387	26S proteasome non-ATPase regulatory subunit 7	5713	Hs.696154
C093R125	0.00429819	0.293933	0.00146467	1.26511	0.339258	1.04057	0.0573786	-1.08137	-0.112863	-1.21578	-0.28188	-1.25145	-0.323597	-1.29862	-0.376981	1.09317	0.128524	-1.15408	-0.20674	-1.26161	-0.335264	Dynein light chain roadblock-type 2	768062	Bt.18339
C152R125	0.00272524	0.539343	0.0332742	-1.16899	-0.225258	-1.2348	-0.304275	1.29608	0.374158	-1.0563	-0.079017	1.143	0.192821	1.0817	0.113304	-1.32555	-0.406596	-1.47952	-0.565129	-1.11615	-0.158533	Myelin expression factor 2	17876	Mm.18535
C196R125	0.0070686	0.935419	0.641135	-1.09379	-0.129339	-1.27806	-0.353952	-1.04582	-0.0646372	-1.16846	-0.224613	-1.02732	-0.0388827	1.00231	0.00333205	-1.07444	-0.103584	-1.21924	-0.285983	-1.13477	-0.182399	Proteasome subunit alpha type-6	29673	Rn.107278
C233R125	0.00192261	0.920188	0.0149915	-1.59217	-0.670996	-1.63436	-0.708723	1.48511	0.570566	-1.0265	-0.0377276	1.48273	0.568253	1.29666	0.374795	-1.59473	-0.673309	-1.87189	-0.904494	-1.1738	-0.231185	LAG1 longevity assurance homolog 2	539223	Bt.49574
C063R126	4.90314e-05	0.633681	4.39562e-05	1.39551	0.480797	1.05135	0.0722439	-1.34231	-0.424721	-1.32735	-0.408553	-1.41132	-0.497046	-1.2181	-0.28463	1.32728	0.408472	1.15856	0.212335	-1.14563	-0.196138	Glutathione S-transferase A
C096R126	0.00680963	0.12563	0.00682104	-1.1813	-0.240377	-1.16526	-0.220657	-1.11685	-0.159441	1.01376	0.01972	-1.07372	-0.102619	-1.60981	-0.686891	-1.13568	-0.183555	-1.67959	-0.748107	-1.47893	-0.564552	Transmembrane protein 59 precursor	733610	Ssc.10575
C146R126	0.000182168	0.100731	0.0345161	1.62647	0.701742	1.60957	0.686679	1.05139	0.0722969	-1.0105	-0.0150629	-1.2213	-0.288419	-1.42527	-0.511232	1.26666	0.341026	1.07412	0.10315	-1.17925	-0.237876	114504 pfam05782, ECM1, Extracellular matrix protein 1 (ECM1). This family consists of several eukaryotic extracellular matrix protein 1 (ECM1) sequences. ECM1 has been shown to regulate endochondral bone formation, stimulate the proliferation of endo...
C192R126	0.000560644	0.531532	0.803453	-1.13908	-0.187866	-1.30777	-0.387107	1.09835	0.135335	-1.14809	-0.199241	-1.04191	-0.0592275	-1.00739	-0.0106286	-1.30353	-0.382429	-1.44701	-0.533071	-1.11006	-0.150642	Protein phosphatase 1G	5496	Hs.699225
C204R126	7.55705e-05	0.9472	0.000532334	1.1714	0.228234	-1.20078	-0.263972	-1.25361	-0.326087	-1.40659	-0.492206	-1.20995	-0.274952	-1.23116	-0.300015	1.21366	0.279369	-1.17927	-0.2379	-1.43124	-0.517268	Pleiotrophic factor-alpha-1 precursor	397791	Xl.897
C016R127	0.000299123	0.0535061	0.0209155	-1.07363	-0.102499	-1.14239	-0.192053	1.03335	0.0473244	-1.06404	-0.0895534	-1.1045	-0.143398	-1.34907	-0.431962	-1.22537	-0.293222	-1.59255	-0.671339	-1.29964	-0.378117	Deoxyuridine 5'-triphosphate nucleotidohydrolase, mitochondrial precursor	1854	Hs.527980
C052R127	0.00472148	0.0234828	0.0471515	-1.0042	-0.00605364	1.10273	0.141083	1.29266	0.370345	1.10737	0.147137	-1.0886	-0.122472	1.22551	0.293385	-1.41311	-0.498871	1.04545	0.0641229	1.47733	0.562994	UNKNOWN
C063R127	0.0053415	0.0690139	1.033e-12	1.44811	0.534168	-1.07028	-0.0979829	4.63826	2.21358	-1.54987	-0.632151	7.25486	2.85895	13.6424	3.77002	2.26504	1.17953	2.74814	1.45845	1.21329	0.278921	Probable ATP-dependent RNA helicase DDX58	230073	Mm.86382
C071R127	0.00528626	0.31191	0.0650881	1.11966	0.163066	1.46492	0.55082	-1.71937	-0.781881	1.30836	0.387755	-1.40854	-0.494197	1.05355	0.0752582	1.36675	0.450749	2.65362	1.40796	1.94155	0.95721	Allograft inflammatory factor 1	29427	Rn.32080
C083R127	0.00685665	0.727444	0.588595	-1.29535	-0.373339	1.23198	0.300978	1.20568	0.269848	1.59584	0.674316	-1.0156	-0.0223266	1.03896	0.0551448	-1.58613	-0.665513	1.06163	0.0862748	1.68388	0.751788	Cytochrome P450 19 type I	403331	Ssc.56422
C146R127	0.00949291	0.85167	0.0587911	1.18134	0.240428	1.16237	0.217064	-1.16852	-0.224688	-1.01633	-0.0233638	-1.08825	-0.122008	-1.13797	-0.186467	1.26849	0.343108	1.19357	0.255285	-1.06277	-0.0878231	Mid1-interacting protein 1	68041	Mm.29429
C173R127	2.36769e-07	0.561608	0.303077	1.35324	0.43642	3.44583	1.78485	-1.20945	-0.274353	2.54635	1.34843	-1.39691	-0.482241	1.0771	0.107151	1.17164	0.228532	4.48888	2.16636	3.83127	1.93782	Ig kappa chain V-IV region B17 precursor
C174R127	0.00293704	0.192558	0.00221949	1.32209	0.402824	1.28481	0.36156	-1.06663	-0.0930619	-1.02901	-0.0412637	-1.29248	-0.370142	-1.22332	-0.290803	1.09107	0.125744	1.12025	0.16382	1.02674	0.0380756	NFU1 iron-sulfur cluster scaffold homolog		Hs.430439
C183R127	0.00211783	0.0501549	0.0536006	1.33756	0.419606	1.27236	0.34751	-1.02552	-0.0363553	-1.05124	-0.0720963	-1.3235	-0.404354	-1.01838	-0.0262726	1.03642	0.0516081	1.28129	0.357593	1.23626	0.305985	CDGSH iron sulfur domain-containing protein 1	52637	Mm.254114
C262R127	0.00180244	0.35353	0.340412	1.18238	0.241699	1.26982	0.344619	-1.00325	-0.00468689	1.07395	0.102921	1.02301	0.032814	-1.17054	-0.227179	1.21352	0.2792	1.08834	0.122128	-1.11502	-0.157072	Serine incorporator 1	294421	Rn.2078
C044R128	7.82066e-05	0.431951	0.00478561	1.42727	0.513256	1.23253	0.301621	-1.35971	-0.443302	-1.158	-0.211635	-1.34668	-0.429405	-1.06958	-0.0970431	1.44108	0.527152	1.56686	0.647879	1.08728	0.120727	Receptor expression-enhancing protein 5
C055R128	0.00970035	0.216659	7.43046e-13	1.41653	0.502358	1.44302	0.52909	11.1319	3.47663	1.0187	0.026732	21.7987	4.44617	31.6705	4.98507	2.77386	1.47189	4.10541	2.03753	1.48004	0.565632	Interferon-induced protein with tetratricopeptide repeats 5	24138	Hs.252839
C160R128	0.000788346	0.897678	0.561855	1.23835	0.308413	1.27759	0.353425	1.03668	0.0519667	1.03169	0.0450116	-1.00072	-0.00104168	1.0625	0.0874613	1.19367	0.255405	1.30941	0.38892	1.09696	0.133515	Receptor-type tyrosine-protein phosphatase-like N precursor	116660	Rn.11097
C180R128	0.00952582	0.684837	0.140846	1.01325	0.0189928	-1.1341	-0.181543	-1.01777	-0.0254107	-1.14912	-0.200536	-1.0811	-0.112504	-1.06574	-0.0918554	-1.04834	-0.0681005	-1.18755	-0.247988	-1.1328	-0.179887	NADH dehydrogenase [ubiquinone] 1 alpha subcomplex subunit 4	406298; 554934	Dr.119865; Dr.75972
C183R128	0.000151334	0.347761	0.0013239	-1.23553	-0.30513	-1.28321	-0.359754	-1.14981	-0.20139	-1.03859	-0.0546239	-1.15405	-0.206711	-1.43211	-0.518141	-1.2401	-0.310451	-1.59826	-0.676505	-1.28882	-0.366054	UNKNOWN
C215R128	0.000379318	0.0662438	1.04068e-06	2.39188	1.25814	1.11829	0.161294	-1.60843	-0.685656	-2.13887	-1.09685	-3.10568	-1.63491	-2.39456	-1.25976	1.23875	0.308891	-1.33128	-0.412812	-1.64913	-0.721703	Beta-1,3-glucosyltransferase	145173	Hs.13205
C250R128	0.00584279	0.264927	0.0309228	-1.02706	-0.0385148	-1.09746	-0.134175	-1.01891	-0.0270209	-1.06855	-0.0956597	-1.05631	-0.0790366	-1.20385	-0.26765	-1.06476	-0.0905305	-1.29666	-0.374804	-1.2178	-0.284273	UNKNOWN
C010R129	0.0022093	0.414448	0.0120232	-1.16022	-0.214397	-1.14617	-0.196826	1.29091	0.368393	1.01225	0.0175712	1.09675	0.133231	1.15253	0.204807	-1.36562	-0.449559	-1.28379	-0.360412	1.06374	0.0891473	Cell division protein kinase 5	1020	Hs.647078
C018R129	0.0040668	0.0560628	0.207499	-1.11884	-0.162006	1.06912	0.096426	1.14536	0.195806	1.19618	0.258432	-1.15684	-0.210191	-1.29169	-0.369264	-1.48247	-0.568004	-1.38381	-0.468645	1.0713	0.099359	Delta-aminolevulinic acid dehydratase
C024R129	1.13564e-08	0.607771	0.39313	1.74405	0.802444	2.40277	1.2647	-1.00497	-0.00714767	1.37769	0.462252	-1.00267	-0.00384698	-1.22322	-0.290687	1.74805	0.805745	1.97405	0.981157	1.12929	0.175412	UNKNOWN
C037R129	1.4077e-06	0.83617	0.537142	-1.47044	-0.556249	-1.50937	-0.59395	-1.0332	-0.0471138	-1.02648	-0.0377009	1.00667	0.00958416	-1.0967	-0.133171	-1.41377	-0.499551	-1.60215	-0.680006	-1.13324	-0.180456	Lamin-B receptor	89789	Rn.6499
C062R129	0.00146757	0.409972	0.420739	1.46816	0.554011	2.04249	1.03033	1.31382	0.393765	1.39119	0.476318	1.05452	0.0765805	-1.06811	-0.0950567	1.1784	0.236826	1.45549	0.541507	1.23515	0.304681	Inhibitor of growth protein 5	727773; 84289	Hs.529172; Hs.645460
C085R129	0.00375082	0.160964	2.26004e-06	1.30301	0.381844	1.20184	0.265245	-1.1771	-0.235242	-1.08418	-0.116599	-1.39853	-0.483914	-1.41712	-0.502962	1.0967	0.133172	-1.00172	-0.00247532	-1.09859	-0.135647	WW domain-binding protein 2	23558	Hs.514489
C124R129	0.00671528	0.188198	0.499387	-1.26485	-0.338963	-1.15162	-0.203663	1.09703	0.133606	1.09832	0.1353	1.06175	0.0864445	-1.40299	-0.48851	-1.30688	-0.386125	-1.77249	-0.825779	-1.35628	-0.439654	DNA replication licensing factor mcm4-B	397843	Xl.1014
C165R129	0.000328827	0.0231852	0.00643174	2.27006	1.18273	1.50659	0.591289	-1.24685	-0.318292	-1.50675	-0.591441	-2.24836	-1.16888	-1.03258	-0.0462583	1.25889	0.332147	1.81922	0.863323	1.44511	0.531176	Ependymin precursor
C171R129	0.000165685	0.0781624	2.33624e-07	1.92057	0.941533	1.43031	0.516326	-1.67188	-0.741468	-1.34277	-0.425207	-2.50864	-1.32691	-1.6124	-0.689208	1.27996	0.356094	1.48307	0.568587	1.15869	0.212493	Apolipoprotein Eb precursor	30314	Dr.121596; Dr.23502
C187R129	0.00664222	0.108924	0.613565	1.10915	0.149456	-1.00974	-0.0139806	1.06049	0.0847345	-1.11995	-0.163436	1.11676	0.159325	-1.3142	-0.394188	1.168	0.224046	-1.40727	-0.492903	-1.6437	-0.716949	Zinc finger and SCAN domain-containing protein 10	84891	Hs.334515
C250R129	0.00310565	0.938142	0.0302181	-1.35513	-0.438429	-1.41402	-0.499801	1.23143	0.300331	-1.04346	-0.0613721	1.18432	0.244056	1.28917	0.36644	-1.40903	-0.494704	-1.35069	-0.433691	1.0432	0.0610125	Nidogen-1 precursor	4811	Hs.356624
C044R130	0.00240494	0.0727405	9.20081e-05	2.35716	1.23705	1.34079	0.423088	-1.77214	-0.825496	-1.75803	-0.81396	-3.13702	-1.6494	-1.37951	-0.464153	1.33159	0.413146	1.72241	0.784431	1.2935	0.371284	Complement component C7 precursor	507339	Bt.18557
C078R130	0.00100269	0.604896	0.252805	-1.49196	-0.577208	1.09835	0.135334	-1.01498	-0.021448	1.63869	0.712542	1.1625	0.217228	1.2598	0.33319	-1.26447	-0.338532	1.40442	0.489971	1.77584	0.828503	Endonuclease domain-containing 1 protein precursor	23052	Hs.167115
C101R130	0.00298715	0.0744646	0.914196	-1.11225	-0.153484	-1.05052	-0.0711037	1.13292	0.180052	1.05876	0.0823801	1.05477	0.0769347	-1.17727	-0.235446	-1.19466	-0.256601	-1.40114	-0.486601	-1.17284	-0.23	14-3-3 protein beta/alpha-1
C110R130	0.00506202	0.894385	1.23766e-05	1.22936	0.297908	-1.03714	-0.0526122	-1.4543	-0.540325	-1.27502	-0.350521	-1.4256	-0.511569	-1.34126	-0.423586	1.25411	0.326665	1.04545	0.0641276	-1.19959	-0.262537	Malate dehydrogenase, cytoplasmic	421281	Gga.1141
C164R130	0.00287596	0.495294	0.015693	-1.14976	-0.201329	-1.05949	-0.0833648	1.18419	0.243899	1.0852	0.117964	1.05682	0.0797264	1.19598	0.258192	-1.28833	-0.365501	-1.04904	-0.0690716	1.2281	0.29643	5'-nucleotidase domain-containing protein 1	221294	Hs.520341
C170R130	0.00640876	0.296508	0.0539436	-1.25883	-0.332089	-1.37608	-0.460565	-1.19088	-0.25203	-1.09314	-0.128476	-1.00167	-0.00240448	-1.45789	-0.543881	-1.05882	-0.082463	-1.68461	-0.752416	-1.59102	-0.669953	Claudin-15	24146	Hs.38738
C171R130	0.000187965	0.625358	0.67087	-1.60496	-0.682538	-1.56933	-0.65015	-1.06022	-0.0843642	1.0227	0.0323886	-1.00287	-0.00412968	1.19908	0.261929	-1.51814	-0.602304	-1.23444	-0.303856	1.22982	0.298448	Myelin P0 protein		Bt.89094
C172R130	0.00375488	0.878339	0.141428	-1.18077	-0.239732	-1.21124	-0.276488	-1.05168	-0.0726964	-1.02581	-0.0367567	-1.09348	-0.128926	-1.13347	-0.180743	-1.2277	-0.295961	-1.30544	-0.384535	-1.06332	-0.0885739	Uncharacterized protein C2orf32 homolog
C208R130	0.000108131	0.664717	0.0951336	-1.63386	-0.708288	-1.50995	-0.594496	-1.27545	-0.351003	1.08207	0.113792	-1.10413	-0.142915	-1.1039	-0.14261	-1.41441	-0.5002	-1.30686	-0.386103	1.0823	0.114097	C-4 methylsterol oxidase	406662	Dr.12110
C236R130	1.85246e-05	0.158946	0.00282499	1.58259	0.662289	1.33899	0.42114	-1.25973	-0.333116	-1.18193	-0.241149	-1.50223	-0.587102	-1.05428	-0.0762563	1.32712	0.408303	1.59992	0.678001	1.20555	0.269697	Ictacalcin
C014R131	0.00892388	0.125116	2.12299e-07	1.05284	0.0742877	1.11844	0.161482	1.30373	0.382642	1.0623	0.0871943	1.68078	0.749128	1.66909	0.739062	1.35733	0.440773	1.43187	0.517901	1.05492	0.0771281	Suppressor of G2 allele of SKP1 homolog	67955	Mm.18972
C037R131	0.00213495	0.26026	0.249438	-1.31298	-0.39284	-1.11861	-0.161707	-1.02181	-0.0311223	1.17376	0.231133	-1.00799	-0.0114845	1.3539	0.437124	-1.29522	-0.373202	1.23674	0.306539	1.60185	0.679741	Calmodulin-like protein 4	539277	Bt.49037
C041R131	0.00687595	0.932148	0.0787686	1.1411	0.190429	1.24589	0.317172	-1.11454	-0.156451	1.09183	0.126743	-1.13229	-0.179244	-1.07191	-0.100188	1.12322	0.167636	1.29543	0.373435	1.15332	0.205799	CD2 antigen cytoplasmic tail-binding protein 2	70233	Mm.28050
C052R131	0.00243817	0.0185483	0.220524	-1.02031	-0.0290018	1.02484	0.0353978	-1.00039	-0.000568122	1.04565	0.0643996	-1.22382	-0.291396	1.05651	0.0793086	-1.24818	-0.31983	1.08318	0.115275	1.35201	0.435104	Vesicle-associated membrane protein 3	29528	Rn.202344
C065R131	0.00330743	0.0336198	0.780321	-1.42677	-0.512758	-1.21557	-0.281634	-1.04096	-0.0579094	1.17375	0.231124	1.26416	0.338182	-1.29034	-0.367748	-1.08423	-0.116666	-1.50678	-0.591473	-1.38973	-0.474807	Protein MCM10 homolog	553396	Dr.40391
C146R131	0.00675206	0.390367	0.38083	-1.05408	-0.0759803	-1.21805	-0.284572	1.16688	0.222657	-1.15556	-0.208592	-1.01067	-0.0153103	1.01893	0.0270589	-1.2431	-0.313947	-1.39491	-0.48017	-1.12212	-0.166223	Small nuclear ribonucleoprotein Sm D3	6634	Hs.356549
C169R131	0.00913026	0.199321	0.113294	-1.44404	-0.530107	-2.17418	-1.12047	-1.24747	-0.319009	-1.50563	-0.590365	1.10693	0.146563	-4.37737	-2.13006	-1.04575	-0.0645354	-7.62918	-2.93153	-7.29542	-2.86699	DnaJ homolog subfamily B member 9	4189	Hs.6790
C210R131	1.57918e-05	0.237373	0.00998203	-1.26736	-0.341824	-1.36611	-0.45007	-1.07014	-0.0978042	-1.07792	-0.108246	-1.11382	-0.155516	-1.42883	-0.514832	-1.31908	-0.399536	-1.82399	-0.867098	-1.38277	-0.467562	Histone H2AV
C230R131	0.00025535	0.463026	0.107802	-1.16984	-0.226308	-1.26434	-0.33838	-1.04732	-0.0667005	-1.08078	-0.112072	-1.02011	-0.0287234	-1.20225	-0.265732	-1.13944	-0.188331	-1.45137	-0.537412	-1.27375	-0.349081	3-hydroxyisobutyrate dehydrogenase, mitochondrial precursor	11112	Hs.406758
C017R132	1.38374e-05	0.0102156	6.38207e-07	3.04783	1.60778	1.31881	0.399237	-1.52036	-0.604418	-2.31105	-1.20855	-3.44746	-1.78553	-2.04357	-1.03109	1.34413	0.426669	-1.0192	-0.0274369	-1.36993	-0.454106	Beta-1,3-glucosyltransferase	145173	Hs.13205
C026R132	8.22731e-06	0.64839	0.618278	-1.33724	-0.419256	-1.90251	-0.927907	1.04068	0.0575237	-1.42272	-0.50865	-1.0565	-0.0792863	1.14681	0.197629	-1.47026	-0.556066	-1.72644	-0.787801	-1.17425	-0.231735	68431 pfam04856, Securin, Securin sister-chromatid separation inhibitor. Securin is also known as pituitary tumour-transforming gene product. Over-expression of securin is associated with a number of tumours, and it has been proposed that this may be d...
C034R132	0.00872376	0.137248	7.58912e-07	1.25176	0.323957	1.23957	0.309841	-1.17796	-0.236294	-1.00983	-0.0141165	-1.39533	-0.480608	-1.39441	-0.479652	1.05676	0.0796431	1.04716	0.0664826	-1.00916	-0.0131605	60S ribosomal protein L12	6136	Hs.408054
C037R132	1.44952e-06	0.617475	0.863269	-1.3955	-0.480785	-1.40619	-0.491796	1.01836	0.0262532	-1.00766	-0.0110111	-1.09011	-0.124475	1.03745	0.0530425	-1.54919	-0.631513	-1.38032	-0.465006	1.12234	0.166507	High mobility group protein B2	397130	Ssc.226
C101R132	8.62616e-06	0.38458	0.154527	1.41554	0.501357	1.6341	0.708499	1.0003	0.000428736	1.1544	0.207142	-1.04502	-0.0635259	-1.25388	-0.326398	1.35416	0.437402	1.30285	0.381672	-1.03939	-0.0557302	UNKNOWN
C249R132	0.000937857	0.623867	0.520514	1.20256	0.266105	1.35211	0.435209	-1.03484	-0.0494036	1.12436	0.169104	1.11624	0.158653	1.07192	0.100198	1.38911	0.474162	1.49984	0.58481	1.07971	0.110649	UNKNOWN
C008R133	0.00526758	0.146289	0.929218	-1.12163	-0.165594	-1.03375	-0.0478897	1.1197	0.163113	1.08501	0.117704	1.02155	0.0307539	-1.15894	-0.212809	-1.2294	-0.297953	-1.34147	-0.423812	-1.09116	-0.125859	Cullin-associated NEDD8-dissociated protein 1	55832	Hs.546407
C010R133	0.00950336	0.167126	0.0236914	1.28756	0.364638	1.42393	0.509873	1.0078	0.0112162	1.10591	0.145236	-1.20121	-0.264487	-1.28382	-0.360445	1.06358	0.0889352	1.10054	0.138212	1.03475	0.0492767	B-cell CLL/lymphoma 7 protein family member B	9275	Hs.647051
C028R133	0.00363167	0.728367	0.131525	-1.16015	-0.214311	-1.12706	-0.17256	1.13387	0.181256	1.02936	0.0417514	1.04257	0.060144	1.07906	0.109779	-1.26175	-0.335423	-1.1843	-0.244036	1.06539	0.0913865	Interleukin enhancer-binding factor 3 homolog	321868	Dr.76843
C042R133	0.000326919	0.323791	2.61445e-07	1.27457	0.350016	1.27076	0.345691	-1.23367	-0.302953	-1.003	-0.0043247	-1.33903	-0.421192	-1.46717	-0.553035	1.17428	0.231778	1.06852	0.0956103	-1.09898	-0.136168	Cytochrome c oxidase subunit 1	808314
C049R133	0.000529111	0.816281	0.283493	1.24802	0.319642	1.14282	0.192598	1.01889	0.0270017	-1.09205	-0.127043	1.04977	0.0700705	1.1161	0.158472	1.28584	0.36271	1.25186	0.324069	-1.02715	-0.0386417	UNKNOWN
C085R133	0.00503906	0.562123	0.0599516	-1.46161	-0.547559	-1.1437	-0.193703	1.06073	0.0850611	1.27797	0.353855	1.19507	0.2571	1.38894	0.473989	-1.29731	-0.375519	1.1449	0.195224	1.48529	0.570744	Chromodomain-helicase-DNA-binding protein 4	107932	Mm.333388
C114R133	3.58001e-06	0.0586997	1.37241e-07	3.61938	1.85574	1.4506	0.536648	-2.0669	-1.04747	-2.4951	-1.3191	-4.25375	-2.08874	-2.40933	-1.26863	1.75865	0.814472	1.24443	0.315483	-1.41322	-0.498989	Beta-1,3-glucosyltransferase	145173	Hs.13205
C126R133	0.000405387	0.891418	0.929053	-1.32894	-0.410278	-1.28152	-0.357861	-1.00505	-0.00726168	1.037	0.0524174	-1.03102	-0.044067	1.05486	0.0770496	-1.36328	-0.447084	-1.20878	-0.27355	1.12782	0.173534	Scaffold attachment factor B2	9667	Hs.655392
C164R133	0.000691885	0.107353	0.0901949	-1.07584	-0.105458	-1.18898	-0.249725	1.01335	0.0191277	-1.10517	-0.144267	-1.21121	-0.276445	-1.06878	-0.0959615	-1.32045	-0.40103	-1.28772	-0.364814	1.02542	0.0362163	Histone H2A.Z	426361	Gga.4671
C193R133	0.000244523	0.883804	5.45082e-05	-1.14458	-0.194813	-1.42916	-0.515166	-1.32793	-0.409184	-1.24864	-0.320353	-1.28009	-0.356249	-1.38194	-0.466696	-1.10334	-0.141878	-1.48728	-0.572677	-1.34798	-0.430799	Rab11 family-interacting protein 2	22841	Hs.173656
C199R133	0.00867072	0.866936	7.35865e-06	1.8653	0.899407	1.21321	0.278832	-2.39559	-1.26038	-1.53749	-0.620575	-2.7515	-1.46022	-2.24296	-1.16541	1.62402	0.699573	1.29577	0.373808	-1.25333	-0.325764	Solute carrier family 22 member 7
C039R134	0.0040253	0.0147706	0.0269745	1.49192	0.577167	1.6528	0.724912	1.12591	0.171088	1.10784	0.147745	-1.25959	-0.33295	-1.44993	-0.535987	1.052	0.0731293	1.01244	0.0178363	-1.03907	-0.055293	Serine/threonine-protein phosphatase PP1-gamma catalytic subunit	282318	Bt.9578
C059R134	0.00971354	0.118059	0.865092	-1.01212	-0.0173753	-1.14698	-0.197842	1.08798	0.121658	-1.13325	-0.180467	-1.09674	-0.133225	1.02976	0.042303	-1.2077	-0.272258	-1.21184	-0.277198	-1.00343	-0.00493929	NADH dehydrogenase [ubiquinone] iron-sulfur protein 6, mitochondrial precursor
C069R134	0.00580581	0.110548	1.79314e-08	1.29877	0.377151	1.17251	0.229605	-1.30994	-0.389496	-1.10768	-0.147546	-1.60358	-0.6813	-1.39554	-0.480825	1.06094	0.085347	1.10059	0.138277	1.03737	0.0529295	60S ribosomal protein L15
C079R134	0.00344889	0.537402	0.955325	1.1648	0.220081	1.20182	0.265227	1.04714	0.066456	1.03179	0.0451459	-1.03936	-0.0557013	-1.00111	-0.00160436	1.07023	0.0979234	1.14644	0.197166	1.07121	0.0992428	UNKNOWN
C113R134	0.00453043	0.28698	0.175511	-1.12814	-0.173943	-1.23357	-0.302839	-1.01395	-0.0199841	-1.09346	-0.128896	1.00254	0.00366266	-1.3424	-0.424817	-1.1098	-0.150296	-1.63317	-0.707671	-1.47159	-0.557375	Phosphoglycerate kinase	395833	Gga.8606
C138R134	0.00333831	0.0273744	0.10003	-1.95114	-0.964318	-1.69216	-0.758864	-1.9439	-0.958952	1.15305	0.205454	-1.2667	-0.341075	1.29543	0.373434	-1.27142	-0.34644	1.48815	0.573523	1.89207	0.919963	ATP-binding cassette sub-family D member 2	225	Hs.591042
C142R134	0.00774858	0.267369	0.0618197	1.36309	0.446879	1.02121	0.0302805	-1.37391	-0.458284	-1.33478	-0.416598	-1.35199	-0.435081	1.07405	0.103063	1.38519	0.470081	1.50694	0.591627	1.0879	0.121546	Syntaxin-12	100226	Mm.28237; Mm.456905
C253R134	0.000991783	0.522218	0.512816	1.1926	0.25411	1.30317	0.38202	1.07082	0.0987185	1.09271	0.127911	1.08979	0.124055	-1.05958	-0.0834926	1.21373	0.279446	1.14855	0.199809	-1.05675	-0.0796371	Class B basic helix-loop-helix protein 2	79431	Rn.81055
C057R135	1.91116e-05	0.0930329	0.00188142	2.1692	1.11716	1.38485	0.46973	-1.15593	-0.209055	-1.56638	-0.647434	-1.78993	-0.839905	-1.30985	-0.389406	1.40086	0.486314	1.22211	0.289378	-1.14626	-0.196936	Clusterin precursor
C084R135	0.00855183	0.913152	0.475792	-1.11013	-0.150723	-1.30117	-0.379807	-1.02015	-0.0287783	-1.17209	-0.229085	-1.07802	-0.108383	-1.04536	-0.0639995	-1.1731	-0.230327	-1.33332	-0.415028	-1.13658	-0.184702	Splicing factor, arginine/serine-rich 7	225027	Mm.292016
C116R135	0.00115822	0.865705	0.492101	-1.2888	-0.366024	-1.18863	-0.249302	1.09537	0.131416	1.08427	0.116722	1.0546	0.0766916	-1.00359	-0.00516863	-1.33862	-0.420748	-1.30666	-0.385886	1.02446	0.0348622	UNKNOWN
C242R135	0.00461046	0.334963	0.000463927	1.15024	0.201932	1.30043	0.378984	1.22372	0.291274	1.13057	0.177052	1.6081	0.685355	1.53136	0.614815	1.51153	0.596013	1.62735	0.702526	1.07662	0.106512	UNKNOWN
C266R135	0.000254325	0.278012	0.00400349	1.63426	0.708635	1.45671	0.54271	-1.2846	-0.361323	-1.12189	-0.165925	-1.60867	-0.685864	-1.13288	-0.179998	1.30504	0.384094	1.65179	0.724034	1.2657	0.33994	Hydroxyacid oxidase 2	509481	Bt.46051
C019R136	0.00360358	0.291973	0.285238	1.22277	0.290148	1.36735	0.451387	1.16664	0.222363	1.11825	0.16124	1.07811	0.108508	-1.06377	-0.089182	1.12998	0.176292	1.10178	0.139842	-1.02559	-0.0364506	Splicing factor 3B subunit 1		Mm.279736
C026R136	0.00575873	0.218577	0.521734	-1.18835	-0.248954	1.03625	0.051367	1.16309	0.217964	1.23142	0.300321	1.08872	0.122627	-1.13094	-0.177522	-1.26953	-0.344291	-1.26938	-0.344119	1.00012	0.000171721	UNKNOWN
C030R136	0.00923473	0.254261	0.112979	-1.16164	-0.216161	1.14152	0.190962	1.18225	0.241535	1.32604	0.407123	1.16358	0.218568	-1.06085	-0.0852184	-1.18028	-0.239128	-1.09869	-0.135791	1.07426	0.103337	Serine/threonine-protein phosphatase 2B catalytic subunit alpha isoform	24674	Rn.6866
C034R136	0.00188146	0.169395	0.0781416	-1.2401	-0.310457	-1.15683	-0.210178	1.07067	0.0985079	1.07198	0.100279	-1.32177	-0.402476	-1.42569	-0.511662	-1.75496	-0.811441	-1.76583	-0.820348	-1.00619	-0.00890765	1-acyl-sn-glycerol-3-phosphate acyltransferase delta		Bt.25871
C105R136	0.00321797	0.209707	0.0585748	1.15903	0.212913	1.23978	0.310089	-1.00984	-0.0141302	1.06968	0.0971758	-1.02953	-0.0419794	-1.20796	-0.272568	1.13687	0.185064	1.03645	0.0516513	-1.09689	-0.133413	UNKNOWN
C150R136	0.000784153	0.352848	8.04344e-05	1.39281	0.477995	1.13757	0.185961	-1.19366	-0.255393	-1.22436	-0.292033	-1.41462	-0.500416	-1.30537	-0.384458	1.17525	0.232971	1.04023	0.0568967	-1.12981	-0.176075	Thioredoxin domain-containing protein 17	445062; 793434	Dr.34068
C168R136	0.00212832	0.869517	0.556378	-1.25221	-0.324475	-1.11269	-0.154047	-1.00381	-0.00549316	1.12539	0.170428	1.03113	0.0442322	1.07051	0.0982922	-1.20978	-0.274749	-1.03545	-0.0502612	1.16836	0.224488	Ornithine decarboxylase antizyme 2	259193	Dr.28785
C217R136	0.00361276	0.635769	0.033485	1.27986	0.355981	1.12541	0.170456	-1.1727	-0.229837	-1.13723	-0.185524	-1.08824	-0.121992	-1.3257	-0.406754	1.37919	0.463826	-1.00449	-0.00646061	-1.38538	-0.470286	AN1-type zinc finger protein 2B	363253	Rn.32162
C242R136	5.24587e-05	0.810786	0.10487	-1.49258	-0.577807	-1.71189	-0.775591	-1.16393	-0.219002	-1.14694	-0.197785	-1.2638	-0.337764	-1.08692	-0.120243	-1.62065	-0.696568	-1.59863	-0.676832	1.01377	0.0197364	DNA replication licensing factor mcm7	407945	Str.48019
C041R137	0.00734968	0.160812	0.099624	-1.1259	-0.171085	1.16276	0.217549	-1.07594	-0.105597	1.30915	0.388633	1.03275	0.0464862	-1.17075	-0.227437	-1.01326	-0.0190016	1.06859	0.0957085	1.08276	0.11471	Homeobox protein Dlx1a	30568	Dr.128
C075R137	1.08008e-05	0.39075	0.224948	1.64406	0.717267	4.8116	2.26652	1.04622	0.0651797	2.92665	1.54925	-1.60101	-0.678979	-1.29854	-0.376893	-1.01882	-0.0268925	3.54171	1.82445	3.60835	1.85134	Ig mu chain C region membrane-bound form
C150R137	0.00652878	0.705359	0.413523	1.10518	0.144282	1.13017	0.176541	1.00014	0.000207216	1.02261	0.0322595	1.01262	0.0180984	1.09219	0.127218	1.11897	0.162173	1.23418	0.303552	1.10296	0.141379	UNKNOWN
C156R137	0.00431491	0.357452	0.0400335	1.13333	0.180571	-1.17395	-0.231365	-1.2987	-0.377069	-1.33047	-0.411936	-1.11708	-0.159726	-1.04636	-0.0653816	1.3176	0.397914	1.05725	0.080322	-1.24625	-0.317592	Deoxyhypusine synthase	288923	Rn.105891
C178R137	3.61269e-06	0.224952	0.302839	1.31425	0.394242	1.4061	0.491704	-1.15747	-0.21098	1.06989	0.0974615	1.07196	0.100255	-1.1314	-0.178115	1.63068	0.705477	1.4385	0.524569	-1.1336	-0.180908	Sequestosome-1	113894	Rn.107103
C196R137	0.0042146	0.781355	0.00230142	1.22903	0.297517	-1.04736	-0.0667549	-1.23834	-0.308412	-1.28723	-0.364272	-1.26694	-0.341351	-1.13823	-0.186791	1.20128	0.264578	1.03876	0.0548658	-1.15646	-0.209712	UNKNOWN
C210R137	1.7453e-05	0.806408	0.298054	-1.20779	-0.272365	-1.41228	-0.498031	1.09705	0.133623	-1.16932	-0.225666	1.02259	0.0322313	1.05537	0.0777554	-1.29572	-0.373757	-1.46805	-0.553899	-1.133	-0.180142	Deoxyuridine 5'-triphosphate nucleotidohydrolase, mitochondrial precursor	1854	Hs.527980
C002R138	0.00688094	0.440068	3.28058e-08	1.28201	0.358403	1.17706	0.23519	-1.37218	-0.456473	-1.08916	-0.123213	-1.54301	-0.625747	-1.60785	-0.685131	1.14008	0.189129	1.00454	0.00653201	-1.13493	-0.182597	40S ribosomal protein S3a	100049481	Ola.4914
C015R138	0.00445345	0.490812	0.906664	-1.13295	-0.180081	-1.19399	-0.255786	1.08975	0.123996	-1.05388	-0.0757049	1.043	0.0607427	-1.11244	-0.153732	-1.18373	-0.243335	-1.44745	-0.533514	-1.22279	-0.29018	Signal recognition particle 72 kDa protein	403944	Cfa.3804
C063R138	2.25632e-08	0.067536	1.77567e-06	1.83245	0.873773	1.76878	0.822751	-1.19215	-0.253569	-1.036	-0.0510218	-1.56203	-0.64342	-1.56441	-0.645616	1.39854	0.483922	1.34789	0.430704	-1.03758	-0.0532178	RNA-binding protein PNO1	393520	Dr.13878
C094R138	0.00511082	0.018849	0.0514567	-1.10646	-0.14595	-1.05286	-0.0743168	1.0923	0.127369	1.05091	0.071633	-1.0332	-0.0471197	-1.71392	-0.777299	-1.24871	-0.320438	-1.97108	-0.978984	-1.57849	-0.658546	B-cell CLL/lymphoma 7 protein family member A	57952	Dr.28229
C096R138	0.00996328	0.105933	0.971014	1.03401	0.0482467	1.16177	0.216323	-1.30069	-0.379281	1.12356	0.168077	1.0639	0.0893621	1.21038	0.275464	1.43087	0.51689	1.82902	0.871068	1.27826	0.354179	Receptor-type tyrosine-protein phosphatase-like N precursor	116660	Rn.11097
C104R138	0.000540285	0.568342	0.767155	-1.44734	-0.533407	-1.02509	-0.0357562	1.03625	0.0513762	1.41191	0.497651	1.12769	0.173366	-1.09289	-0.128142	-1.32999	-0.411418	-1.16092	-0.215274	1.14563	0.196143	Casein kinase II subunit alpha'	415626	Gga.22917
C117R138	0.00733531	0.277184	0.474477	-1.13851	-0.187152	-1.19389	-0.255667	1.12067	0.164357	-1.04864	-0.0685147	-1.05245	-0.0737527	-1.28523	-0.362028	-1.34282	-0.425261	-1.71957	-0.782052	-1.28057	-0.35679	Transcription elongation factor 1 homolog	84337	Hs.631633
C145R138	0.000193578	0.604077	0.00794038	1.53831	0.621343	1.13152	0.178261	-1.13394	-0.181341	-1.35951	-0.443082	-1.31678	-0.397017	-1.28212	-0.358535	1.3247	0.405667	1.00074	0.00106704	-1.32372	-0.4046	Vacuolar ATP synthase subunit e 2	155066	Hs.556998
C149R138	0.000526041	0.0918053	0.230264	1.34191	0.424285	1.2065	0.270823	-1.0039	-0.0056102	-1.11224	-0.153463	-1.21872	-0.285368	1.02556	0.0364107	1.10537	0.144527	1.24215	0.312843	1.12375	0.168316	CDGSH iron sulfur domain-containing protein 1	52637	Mm.254114
C163R138	0.00457072	0.144365	0.811583	-1.23413	-0.303499	-1.21628	-0.282476	1.02024	0.0289117	1.01468	0.0210228	1.1586	0.212383	-1.24138	-0.311947	-1.08676	-0.120028	-1.54043	-0.623335	-1.41746	-0.503307	Hemagglutinin/amebocyte aggregation factor precursor
C212R138	0.000191878	0.120887	0.523476	-1.5596	-0.641177	-1.61616	-0.692571	-1.09727	-0.133919	-1.03627	-0.0513936	1.25783	0.33094	1.0106	0.0152086	-1.13	-0.176319	-1.45745	-0.543443	-1.28978	-0.367125	Peroxiredoxin-6	429062	Gga.34325
C001R139	3.37794e-05	0.890432	0.0612804	-1.19897	-0.26179	-1.49053	-0.575822	-1.09417	-0.12984	-1.24318	-0.314032	-1.15845	-0.212192	-1.11555	-0.157752	-1.2694	-0.344142	-1.51964	-0.603733	-1.19714	-0.259591	Stathmin	396057	Gga.2844
C034R139	0.00118259	0.73612	0.00708414	1.2743	0.3497	1.38538	0.470286	-1.12563	-0.170729	1.08718	0.120587	-1.18029	-0.239139	-1.2757	-0.351287	1.21528	0.28129	1.22241	0.289729	1.00587	0.00843853	Receptor-type tyrosine-protein phosphatase-like N precursor		Mm.2902
C104R139	0.000971156	0.828397	2.29351e-06	2.32785	1.219	1.56884	0.649699	-2.44992	-1.29273	-1.4838	-0.569299	-3.00519	-1.58746	-2.96406	-1.56757	1.89773	0.924274	1.29671	0.374858	-1.46349	-0.549416	Beta-1,3-glucosyltransferase	145173	Hs.13205
C196R139	0.000352044	0.148738	0.00254703	-1.06189	-0.0866372	-1.30006	-0.378583	-1.20928	-0.274153	-1.22429	-0.291945	-1.0619	-0.0866438	-1.51725	-0.601463	1.07242	0.100872	-1.63115	-0.705892	-1.74928	-0.806764	Cleavage stimulation factor 77 kDa subunit	228410	Mm.259876; Mm.439826
C213R139	0.006161	0.263264	0.0315416	-1.04212	-0.0595262	-1.10932	-0.14968	-1.00443	-0.00637136	-1.06448	-0.0901536	-1.12895	-0.174977	-1.16967	-0.226101	-1.17132	-0.228132	-1.29182	-0.369409	-1.10288	-0.141277	Proteasome subunit beta type-5 precursor	19173	Mm.8911
C042R140	0.00129332	0.117233	0.653847	1.28094	0.357201	1.24032	0.310718	1.09059	0.125104	-1.03274	-0.0464829	-1.08781	-0.121427	-1.0602	-0.084342	1.07973	0.110669	1.07272	0.101271	-1.00654	-0.00939778	UNKNOWN
C084R140	0.00945992	0.281565	0.0487433	1.55617	0.638003	1.23634	0.306079	-1.06381	-0.0892404	-1.25869	-0.331925	-1.4193	-0.505181	-1.15133	-0.203304	1.1664	0.222063	1.14236	0.192015	-1.02105	-0.0300475	Homeodomain-only protein	386589	Dr.117691
C086R140	0.00297394	0.219114	0.00669045	-1.57465	-0.655033	-1.49529	-0.580423	1.07204	0.100363	1.05308	0.0746102	1.28694	0.363947	1.67107	0.740773	-1.31171	-0.391449	1.04246	0.0599865	1.3674	0.451435	UNKNOWN
C149R140	0.0069634	0.26884	0.000482154	1.14838	0.199595	1.07996	0.110973	1.12688	0.172332	-1.06335	-0.0886219	1.15155	0.203583	1.39396	0.479187	1.17352	0.230845	1.33591	0.417828	1.13838	0.186983	UNKNOWN
C189R140	0.00138568	0.0249053	0.00980336	-1.05238	-0.0736508	-1.1954	-0.257495	-1.19405	-0.255867	-1.13591	-0.183844	1.06149	0.0860972	-1.823	-0.866315	1.2044	0.268313	-1.82506	-0.867943	-2.1981	-1.13626	Glutathione S-transferase theta-1	396322	Gga.2437
C225R140	0.00245451	0.211403	0.0310081	-1.68746	-0.754853	-1.43346	-0.519504	1.13037	0.176797	1.17719	0.235349	1.57695	0.657136	1.11069	0.151455	-1.20959	-0.274514	-1.45886	-0.544845	-1.20608	-0.270331	Zinc finger protein 490	57474	Hs.655860
C255R140	0.0051212	0.194414	6.08333e-05	-1.3628	-0.446571	-1.27832	-0.35425	1.18877	0.249466	1.06608	0.0923209	1.34455	0.427119	1.67527	0.744396	-1.2049	-0.268919	1.10242	0.14068	1.32832	0.409598	Synaptotagmin-4	6860	Hs.8059
C256R140	9.26074e-05	0.949987	0.289017	1.26872	0.343373	1.71873	0.781339	-1.08238	-0.114203	1.35469	0.437967	-1.13086	-0.177419	-1.06679	-0.0932767	1.21433	0.280157	1.74384	0.802266	1.43605	0.522109	Formin-like protein 1	57778	Mm.138913
C265R140	0.000152798	0.0862507	2.14041e-05	-1.38422	-0.469075	-1.11013	-0.150725	1.16194	0.216538	1.2469	0.31835	1.3255	0.406539	1.71569	0.778789	-1.21342	-0.279074	1.33009	0.411526	1.61395	0.6906	Plectin-1	64204	Rn.1085
C063R141	0.00194175	0.606998	0.00153856	-1.25377	-0.326269	-1.05884	-0.0824914	1.14926	0.200705	1.18409	0.243778	1.19358	0.255296	1.34115	0.423476	-1.20721	-0.271679	1.10212	0.140279	1.33049	0.411958	Microtubule-associated protein 6 homolog
C069R141	0.000152895	0.866586	0.130641	-1.43447	-0.520517	-1.43823	-0.524299	1.06494	0.0907724	-1.00263	-0.00378251	1.12069	0.164385	1.1733	0.230575	-1.36311	-0.446904	-1.3054	-0.384496	1.04421	0.0624076	X/potassium-transporting ATPase subunit beta-m	23439	Hs.662608
C111R141	0.000320334	0.552934	5.09887e-07	1.31673	0.396964	1.07332	0.10208	-1.31499	-0.395054	-1.22679	-0.294884	-1.45756	-0.543559	-1.3322	-0.413806	1.18794	0.248458	1.05946	0.0833273	-1.12127	-0.165131	60S ribosomal protein L10	286790; 782629	Bt.46990
C180R141	0.00120468	0.62157	2.31193e-05	1.43879	0.524859	1.26806	0.342626	-1.31733	-0.397618	-1.13464	-0.182233	-1.48341	-0.568913	-1.54589	-0.628436	1.27771	0.353564	1.08058	0.111808	-1.18243	-0.241756	Ribosome biogenesis protein NSA2 homolog	10412	Hs.482526
C185R141	0.00917867	0.472252	0.0255835	1.2766	0.352304	1.10549	0.144684	-1.06416	-0.0897169	-1.15478	-0.20762	-1.21527	-0.281281	-1.12652	-0.17187	1.11786	0.160741	1.0443	0.0625311	-1.07044	-0.0982098	118767 pfam10243, MIP-T3, Microtubule-binding protein MIP-T3. This protein, which interacts with both microtubules and TRAF3 (tumour necrosis factor receptor-associated factor 3), is conserved from worms to humans. The N-terminal region is the microtu...
C208R141	0.00583322	0.656991	0.472801	1.32903	0.410372	1.29738	0.375601	-1.02906	-0.0413224	-1.02439	-0.0347705	1.03184	0.0452223	1.25082	0.32287	1.41119	0.496916	1.66994	0.739794	1.18335	0.242877	UNKNOWN
C259R141	0.00319321	0.529487	0.00766132	3.18882	1.67302	1.35709	0.440519	1.99197	0.994199	-2.34974	-1.2325	1.51124	0.595728	3.40974	1.76966	2.41923	1.27455	2.32299	1.21598	-1.04143	-0.0585667	40S ribosomal protein S2
C026R142	0.000449766	0.080293	0.000322329	1.5598	0.641363	1.66408	0.734721	-1.10981	-0.150308	1.06685	0.0933572	-1.56848	-0.649366	-1.43275	-0.518791	1.10367	0.142305	1.28899	0.366238	1.16791	0.223933	Ictacalcin
C036R142	0.00465025	0.401031	0.435821	-1.13551	-0.183343	-1.1872	-0.247564	1.09081	0.125404	-1.04552	-0.0642208	-1.05456	-0.0766351	1.10511	0.144195	-1.30621	-0.385382	-1.17184	-0.228773	1.11466	0.156609	Histone H2AV
C083R142	0.00043297	0.0762641	0.000602147	-1.31403	-0.394001	1.06121	0.0857088	1.38105	0.465761	1.39446	0.47971	1.41199	0.497735	-1.00019	-0.000268936	-1.28523	-0.362028	-1.30163	-0.380321	-1.01276	-0.0182937	Uncharacterized protein KIAA1853 homolog	68955	Mm.146779
C130R142	0.000108691	0.805423	0.634709	-1.50761	-0.592262	-1.50402	-0.588822	-1.09509	-0.131053	1.00239	0.00343984	-1.07956	-0.110448	1.04959	0.0698292	-1.48623	-0.571656	-1.30852	-0.38794	1.13581	0.183717	Dysbindin domain-containing protein 1	79007	Hs.301394
C176R142	0.00506859	0.0998467	1.48016e-05	-1.09869	-0.135787	-1.09844	-0.135459	-1.17878	-0.237292	1.00023	0.000328004	-1.15748	-0.21099	-1.49961	-0.584589	-1.07884	-0.109485	-1.39741	-0.482756	-1.29529	-0.373271	Endothelial differentiation-related factor 1 homolog	417286	Gga.4585
C179R142	0.00271552	0.424682	0.00908822	1.03989	0.0564274	-1.34599	-0.428665	-1.09712	-0.133726	-1.39968	-0.485093	-1.337	-0.419004	-1.30992	-0.389481	-1.1719	-0.228851	-1.60706	-0.68442	-1.37132	-0.45557	Protein preY, mitochondrial precursor	496649	Str.20118
C191R142	0.00181714	0.803591	0.0642499	-1.06259	-0.0875868	-1.24325	-0.314117	-1.10109	-0.138939	-1.17002	-0.226531	-1.07761	-0.107839	-1.03475	-0.0492824	-1.03993	-0.0564868	-1.16834	-0.224461	-1.12348	-0.167974	Eukaryotic translation initiation factor 1b	10289	Hs.315230
C229R142	0.00735348	0.568527	0.908594	-1.40879	-0.494458	-1.26399	-0.337982	-1.11199	-0.153144	1.11456	0.156476	1.05582	0.0783625	1.02545	0.0362556	-1.19993	-0.262952	-1.10848	-0.148582	1.0825	0.114369	Acyl-CoA desaturase
C231R142	0.00325275	0.0169861	3.2391e-11	1.12639	0.171709	-1.08373	-0.116	2.39596	1.2606	-1.2207	-0.287709	5.16451	2.36863	5.0811	2.34514	2.42794	1.27974	1.95685	0.968536	-1.24074	-0.3112	Signal transducer and activator of transcription 1-alpha/beta	6772	Hs.699271
C240R142	0.00853291	0.115924	0.0038925	1.16385	0.218903	-1.93437	-0.951865	-1.62267	-0.698368	-2.25131	-1.17077	-1.83206	-0.873465	1.03001	0.0426589	1.03083	0.0438058	-1.15736	-0.210838	-1.19304	-0.254644	Collagen alpha-1(I) chain precursor		Gga.2073; Gga.43371
C263R142	1.7834e-07	0.190771	0.451335	-1.39354	-0.478754	-1.37385	-0.458228	1.21249	0.277969	1.01433	0.0205253	-1.03134	-0.0445161	-1.01747	-0.0249849	-1.7426	-0.801239	-1.69488	-0.761183	1.02815	0.0400565	Histone H2AV
C018R143	0.000216128	0.0423963	5.58077e-10	2.74287	1.45569	1.49274	0.577964	-2.32459	-1.21697	-1.83747	-0.877722	-4.68693	-2.22864	-5.1178	-2.35552	1.36039	0.444018	-1.47487	-0.560586	-2.00639	-1.0046	Plasma retinol-binding protein 2
C031R143	0.00832307	0.0289762	1.61578e-05	1.96487	0.974432	1.40291	0.488423	-1.25633	-0.329212	-1.40057	-0.486009	-2.32716	-1.21857	-1.84319	-0.882202	1.06074	0.0850706	-1.04577	-0.0645682	-1.10929	-0.149639	Laminin subunit beta-1 precursor		Mm.172674
C085R143	0.00282281	0.417917	0.402693	1.41257	0.498322	1.03536	0.0501379	-1.12373	-0.16829	-1.36432	-0.448184	-1.20694	-0.271355	1.10337	0.141922	1.31518	0.395257	1.28374	0.36035	-1.02449	-0.0349069	Methylmalonate-semialdehyde dehydrogenase [acylating], mitochondrial precursor	104776	Mm.247510
C109R143	0.000365475	0.185027	0.594801	-1.59411	-0.672747	-2.01956	-1.01404	-1.15855	-0.212317	-1.26689	-0.341292	-1.04164	-0.0588503	1.41782	0.503679	-1.43324	-0.51928	-1.22948	-0.298043	1.16573	0.221237	Histone H1
C141R143	0.000129909	0.648061	0.498015	-1.10988	-0.150404	-1.46702	-0.552888	1.06464	0.0903688	-1.32178	-0.402484	-1.03013	-0.0428219	1.08884	0.122793	-1.21722	-0.283595	-1.43442	-0.520464	-1.17843	-0.236869	Histone H1.0-B
C213R143	0.00236008	0.950925	0.0312591	1.31019	0.389774	-1.19336	-0.255025	-1.29247	-0.370136	-1.56352	-0.644799	-1.2386	-0.308713	-1.1992	-0.262072	1.36717	0.451196	-1.10724	-0.146962	-1.51378	-0.598159	UNKNOWN
C222R143	0.00263211	0.491416	0.31806	1.01564	0.0223958	-1.16973	-0.226178	1.07652	0.10637	-1.18803	-0.248573	1.12988	0.176175	-1.04126	-0.0583236	1.06599	0.0922001	-1.31119	-0.390872	-1.39772	-0.483072	26S protease regulatory subunit 8	397043	Ssc.5451
C226R143	0.0019367	0.924275	0.000296924	1.25459	0.327216	-1.0226	-0.0322418	-1.28183	-0.358206	-1.28294	-0.359458	-1.28866	-0.365868	-1.37017	-0.45435	1.24795	0.319555	-1.09307	-0.128386	-1.36409	-0.447941	26S proteasome non-ATPase regulatory subunit 9	161475	Rn.24127
C015R144	0.00127298	0.948153	0.128827	-1.43624	-0.522299	-1.24566	-0.316905	1.19573	0.257891	1.153	0.205394	1.16439	0.21957	1.10484	0.143843	-1.4749	-0.560619	-1.34812	-0.430953	1.09404	0.129667	Calreticulin precursor	811	Hs.515162
C042R144	0.000138114	0.200676	0.144294	-1.14449	-0.194702	-1.24016	-0.310522	1.01237	0.0177313	-1.08359	-0.11582	-1.19577	-0.257936	-1.06842	-0.095475	-1.38546	-0.470369	-1.34139	-0.423729	1.03286	0.0466408	6-phosphogluconolactonase	616120	Bt.60804
C088R144	0.00162496	0.0323819	0.380232	-1.15362	-0.206167	1.01281	0.0183618	1.07913	0.10987	1.1684	0.224529	1.03682	0.0521684	-1.25142	-0.323563	-1.20069	-0.263869	-1.33336	-0.415072	-1.1105	-0.151203	Myosin light polypeptide 6	362816	Rn.146093
C093R144	0.00302154	0.0282964	0.332068	-1.28897	-0.366215	-1.47011	-0.555929	1.06783	0.0946752	-1.14054	-0.189714	-1.33135	-0.412891	1.74879	0.806359	-1.83246	-0.873781	1.114	0.155755	2.04137	1.02954	Calreticulin precursor	100009050	Ocu.1840
C102R144	0.000281188	0.126407	0.281934	1.14562	0.196125	1.1475	0.198495	-1.19502	-0.257034	1.00164	0.00236952	-1.09378	-0.129327	1.10756	0.147379	1.25165	0.323832	1.51877	0.602908	1.21342	0.279076	Eukaryotic translation initiation factor 5
C123R144	1.1138e-05	0.459249	1.30425e-05	1.44793	0.533991	1.18875	0.249441	-1.34823	-0.431071	-1.21803	-0.28455	-1.30707	-0.386338	-1.62715	-0.702351	1.49353	0.578724	-1.01525	-0.0218391	-1.51631	-0.600563	Uncharacterized protein C7orf24 homolog	533374	Bt.21270
C139R144	0.0060061	0.0364648	0.104762	1.21047	0.27557	1.39663	0.481953	-1.08108	-0.112478	1.15379	0.206383	1.13809	0.186614	-1.60301	-0.680781	1.48933	0.574662	-1.06168	-0.0863497	-1.58119	-0.661012	Protein LTV1 homolog	436587	Dr.84279
C161R144	0.00609671	0.395851	0.00365619	-1.61793	-0.694153	-1.47459	-0.560314	1.20984	0.274819	1.09721	0.13384	1.37092	0.45514	1.87185	0.904461	-1.42784	-0.513832	1.04923	0.0693287	1.49813	0.583161	Voltage-gated potassium channel subunit beta-2	541597	Bt.37440
C217R144	0.00265314	0.397374	0.131936	-1.01114	-0.0159892	-1.21773	-0.284195	-1.01135	-0.0162758	-1.20431	-0.268206	-1.04714	-0.0664489	-1.27165	-0.3467	-1.04693	-0.0661622	-1.53115	-0.614619	-1.46252	-0.548457	UNKNOWN
C219R144	0.00108598	0.959044	0.596678	-1.09897	-0.136155	-1.2361	-0.305799	1.03912	0.0553664	-1.12478	-0.169644	1.01997	0.0285288	1.00964	0.0138392	-1.11961	-0.162993	-1.2722	-0.347326	-1.13629	-0.184333	Proteasome subunit alpha type-5	26442	Mm.208883
C221R144	0.00389649	0.720898	0.0030421	1.23056	0.299316	-1.15165	-0.203704	-1.19082	-0.251956	-1.41718	-0.50302	-1.30689	-0.386136	-1.39471	-0.479961	1.12127	0.165136	-1.34883	-0.431709	-1.51241	-0.596845	Cytochrome c oxidase polypeptide VIIa-liver/heart, mitochondrial precursor	327688	Bt.4970
C227R144	0.000187517	0.36939	0.0240005	-1.27427	-0.34967	-1.56821	-0.649119	-1.27991	-0.356038	-1.23067	-0.299449	-1.09828	-0.13524	-1.08355	-0.115768	-1.09344	-0.128873	-1.32763	-0.408849	-1.21418	-0.279976	UNKNOWN
C259R144	0.00276845	0.551239	0.0370644	-1.47453	-0.560258	1.05064	0.0712724	1.09281	0.128038	1.54921	0.63153	1.34146	0.423809	1.26045	0.333936	-1.20121	-0.264487	1.21182	0.277171	1.45564	0.541658	UNKNOWN
C044R145	0.00237835	0.31107	0.0144817	1.304	0.382947	1.59176	0.670622	1.37289	0.457219	1.22067	0.287675	1.06009	0.0841889	1.47746	0.563123	1.0069	0.00991636	1.713	0.776525	1.70127	0.766609	fMet-Leu-Phe receptor
C064R145	7.58366e-05	0.152196	0.000274657	-1.41946	-0.505342	-1.24954	-0.321401	1.0825	0.114371	1.13598	0.183941	1.28775	0.364849	1.34612	0.42881	-1.19322	-0.254864	-1.00484	-0.00696304	1.18748	0.247901	UNKNOWN
C070R145	0.00059933	0.266656	0.0468975	1.24125	0.311793	1.29876	0.37714	-1.02121	-0.0302748	1.04634	0.0653471	-1.18182	-0.241005	-1.08786	-0.121495	1.07256	0.101063	1.21919	0.28592	1.1367	0.184857	40S ribosomal protein S23
C106R145	0.00103796	0.694232	0.0084343	-1.26197	-0.335682	-1.28548	-0.362307	-1.1687	-0.2249	-1.01863	-0.0266255	-1.12929	-0.175417	-1.30601	-0.385165	-1.21942	-0.286198	-1.43651	-0.522572	-1.17803	-0.236374	Methionine-R-sulfoxide reductase B1		Dr.24956
C122R145	0.00787431	0.582372	0.0231879	-1.04388	-0.0619511	-1.20579	-0.269978	-1.06701	-0.093573	-1.15511	-0.208027	-1.1491	-0.200509	-1.25343	-0.325876	-1.12419	-0.168887	-1.41645	-0.502282	-1.25997	-0.333395	Acyl-CoA-binding protein	768330	Bt.46917
C127R145	0.00197988	0.840282	0.00668727	-1.2764	-0.352081	1.0007	0.00101037	1.19553	0.257653	1.27729	0.353092	1.2424	0.31313	1.13387	0.181258	-1.22825	-0.296605	-1.05364	-0.0753855	1.16572	0.221219	Glutamate receptor 2 precursor
C142R145	0.00182194	0.787398	0.709306	-1.33862	-0.420744	-1.5991	-0.677263	1.08104	0.112414	-1.19459	-0.256519	-1.05525	-0.0775837	1.10101	0.138825	-1.52704	-0.610742	-1.57009	-0.650851	-1.02819	-0.0401099	Glycine receptor subunit alpha-2 precursor	24397	Rn.10379
C164R145	2.6119e-07	0.278425	0.00532909	-1.46358	-0.5495	-1.33818	-0.420272	1.29185	0.369436	1.09371	0.129228	1.27864	0.354615	1.02067	0.0295146	-1.47869	-0.56432	-1.69372	-0.760193	-1.14542	-0.195873	Enhancer of zeste homolog 2	14056	Mm.246688
C185R145	0.00244762	0.36974	0.0151996	1.28961	0.366939	-1.15135	-0.203326	-1.22013	-0.287034	-1.4848	-0.570265	-1.31987	-0.400394	-1.03023	-0.0429647	1.19216	0.25358	1.02864	0.0407434	-1.15896	-0.212836	NADH dehydrogenase [ubiquinone] 1 beta subcomplex subunit 6	4712	Hs.493668
C194R145	0.00967786	0.385747	0.0406123	1.4307	0.516722	1.19385	0.255625	-1.09757	-0.134309	-1.19839	-0.261097	-1.14307	-0.192917	-1.64056	-0.714192	1.37375	0.458115	-1.25202	-0.324258	-1.71996	-0.782372	60S ribosomal protein L3	41347	Dm.6703
C234R145	9.87399e-05	0.862798	0.128801	1.21336	0.279002	1.13289	0.180006	-1.09696	-0.133508	-1.07103	-0.0989961	-1.06846	-0.0955372	-1.03537	-0.0501434	1.24571	0.316973	1.20028	0.26337	-1.03785	-0.0536024	UPF0446 protein C12orf31 homolog	100003313; 566419	Dr.114725; Dr.76242
C125R146	0.00321418	0.251764	0.635063	-1.086	-0.119024	-1.28004	-0.35619	-1.00744	-0.0106968	-1.17868	-0.237166	-1.13859	-0.187252	1.06976	0.097284	-1.22738	-0.295579	-1.18773	-0.24821	1.03338	0.0473696	115720 pfam07084, Spot_14, Thyroid hormone-inducible hepatic protein Spot 14. This family consists of several thyroid hormone-inducible hepatic protein (Spot 14 or S14) sequences. Mainly expressed in tissues that synthesise triglycerides, the mRNA cod...
C134R146	0.00276885	0.924999	0.636173	-2.49847	-1.32105	-1.58869	-0.667838	1.26292	0.336765	1.57266	0.653209	1.0217	0.0309784	1.13584	0.183761	-3.08834	-1.62683	-1.76644	-0.820842	1.74835	0.805992	Latent-transforming growth factor beta-binding protein 1 precursor	59107	Rn.40942
C151R146	0.00248358	0.133963	0.481112	1.56153	0.642959	1.2933	0.371058	1.00594	0.00854874	-1.2074	-0.271901	-1.32973	-0.411132	1.10417	0.142957	1.16738	0.223278	1.41958	0.505466	1.21604	0.282188	Medium-chain specific acyl-CoA dehydrogenase, mitochondrial precursor	505968	Bt.61205
C212R146	0.00159122	0.800893	0.122346	-1.36616	-0.450124	-1.65096	-0.723308	-1.23932	-0.30955	-1.20847	-0.273184	-1.09616	-0.132462	-1.14242	-0.192093	-1.20835	-0.273035	-1.52188	-0.60585	-1.25947	-0.332815	UNKNOWN
C240R146	0.00635628	0.140988	0.554317	-1.34347	-0.425967	-1.34824	-0.431075	-1.04967	-0.0699425	-1.00355	-0.00510782	1.23986	0.310172	-1.04404	-0.0621759	-1.03229	-0.0458524	-1.341	-0.423309	-1.29905	-0.377456	UNKNOWN
C006R147	0.000126932	0.0395917	0.0143712	-1.34273	-0.425168	-1.22724	-0.295416	-1.02411	-0.0343738	1.09411	0.129753	1.19436	0.256237	1.16159	0.216103	-1.09776	-0.134557	-1.03164	-0.0449384	1.06409	0.0896189	UNKNOWN
C014R147	0.0038789	0.035571	5.8545e-09	1.04929	0.0694136	1.02909	0.0413727	1.28972	0.367055	-1.01963	-0.0280409	1.69845	0.76422	1.57744	0.657582	1.38183	0.466578	1.25867	0.3319	-1.09785	-0.134679	Suppressor of G2 allele of SKP1 homolog	67955	Mm.18972
C016R147	2.44707e-05	0.31567	0.00772906	-1.24057	-0.311002	-1.36746	-0.451503	-1.05961	-0.0835389	-1.10229	-0.1405	-1.25555	-0.328321	-1.33957	-0.421773	-1.46997	-0.555784	-1.72876	-0.789737	-1.17605	-0.233952	UNKNOWN
C021R147	0.00586264	0.648206	0.425609	1.19528	0.257347	1.10577	0.14505	1.01866	0.0266673	-1.08095	-0.112297	-1.01046	-0.0150084	1.11649	0.158972	1.16124	0.215671	1.21197	0.277355	1.04368	0.0616837	Probable ubiquitin carboxyl-terminal hydrolase CYLD	1540	Hs.578973
C032R147	0.00296327	0.672136	0.528328	-1.2354	-0.304979	-1.06538	-0.0913712	1.01276	0.0182877	1.15958	0.213608	-1.00294	-0.00423989	-1.12786	-0.173588	-1.25484	-0.327507	-1.21693	-0.283247	1.03115	0.0442599	Sorting nexin-3	8724	Hs.12102
C073R147	0.00639811	0.255284	0.766936	-1.09032	-0.124746	1.13423	0.181707	-1.12919	-0.175289	1.23666	0.306453	-1.00748	-0.0107572	1.21205	0.27745	1.02796	0.0397861	1.55234	0.634446	1.51012	0.59466	40S ribosomal protein S15a	6210	Hs.370504
C088R147	0.000976741	0.865713	0.0648494	-1.13108	-0.177701	1.19022	0.251224	1.13461	0.182192	1.34623	0.428925	1.07854	0.109074	1.16655	0.222254	-1.18988	-0.250819	1.22373	0.291286	1.4561	0.542105	CAP-Gly domain-containing linker protein 1	395784	Gga.3130
C095R147	0.000130289	0.041242	0.00119754	1.71608	0.77912	1.44773	0.53379	-1.03938	-0.0557188	-1.18536	-0.24533	-1.51218	-0.596627	-1.36855	-0.452653	1.17953	0.238212	1.09951	0.136856	-1.07278	-0.101355	Pentraxin fusion protein precursor		Xl.307
C104R147	0.000866467	0.0780795	0.0290858	-1.83198	-0.873402	-1.42825	-0.514251	-1.00077	-0.00110844	1.28267	0.359151	1.54222	0.625005	1.21826	0.284824	-1.18697	-0.247289	-1.17147	-0.228319	1.01324	0.0189697	Dynamin-1-like protein	393896	Dr.77967
C115R147	0.00237373	0.679797	7.58801e-06	-1.22644	-0.294475	-1.17183	-0.228759	1.55884	0.640473	1.0466	0.0657152	1.37816	0.462743	1.44617	0.532239	-1.38723	-0.472204	-1.26312	-0.336994	1.09825	0.135211	UNKNOWN
C152R147	0.00762537	0.646288	0.192241	5.92652	2.56719	5.68694	2.50765	-1.38189	-0.466638	-1.04213	-0.0595329	-1.32214	-0.402872	-4.5603	-2.18913	6.19434	2.63095	1.72329	0.785161	-3.5945	-1.84579	UNKNOWN
C157R147	0.000212503	0.977351	0.039686	1.38541	0.470313	1.33506	0.416906	1.15815	0.211817	-1.03771	-0.0534073	1.14499	0.195333	1.19179	0.253129	1.36967	0.453829	1.37384	0.458218	1.00305	0.00438922	UNKNOWN
C199R147	1.12001e-07	0.273228	7.25881e-05	2.27542	1.18613	2.00501	1.00361	-1.26328	-0.337178	-1.13487	-0.182523	-1.66155	-0.732529	-1.70033	-0.765818	1.73001	0.790784	1.48965	0.574971	-1.16136	-0.215813	Membrane-associated progesterone receptor component 1
C238R147	0.00671021	0.239506	6.14965e-05	-1.57973	-0.659682	-1.21738	-0.283776	1.2697	0.344486	1.29765	0.375906	1.7211	0.783332	1.60867	0.685864	-1.16541	-0.220837	1.04073	0.0576017	1.21288	0.278439	UNKNOWN
C077R148	0.00737417	0.304731	0.49256	2.5389	1.3442	2.00143	1.00103	1.31136	0.391064	-1.26854	-0.343171	-1.11119	-0.15211	-1.86042	-0.895627	1.74234	0.801027	-1.21897	-0.285662	-2.12386	-1.08669	UNKNOWN
C086R148	0.000150627	0.862568	0.0847785	1.38682	0.471777	2.67852	1.42144	-1.43122	-0.517249	1.93142	0.949661	-1.4716	-0.557388	-1.16412	-0.219236	1.34876	0.431639	3.29311	1.71945	2.44158	1.28781	Mitogen-activated protein kinase kinase kinase kinase 5	399510	Mm.291936; Mm.341948
C104R148	0.000161518	0.665123	0.0501738	1.54006	0.622988	1.19924	0.26212	-1.09963	-0.13702	-1.2842	-0.360868	-1.25672	-0.329658	-1.14075	-0.18998	1.34756	0.43035	1.15602	0.209161	-1.16569	-0.22119	Keratin, type I cytoskeletal 13
C130R148	0.00919749	0.752986	0.167812	-1.19786	-0.260455	-1.39143	-0.476571	-1.04688	-0.0660981	-1.1616	-0.216116	-1.1982	-0.26087	-1.23157	-0.300503	-1.371	-0.455227	-1.63691	-0.710976	-1.19396	-0.255749	Abhydrolase domain-containing protein 6-A	444738	Xl.2672
C158R148	0.0084584	0.262025	0.00884526	1.61376	0.690423	1.32268	0.40346	-1.10003	-0.137547	-1.22007	-0.286963	-1.51157	-0.596047	-1.33524	-0.4171	1.1744	0.231923	1.08968	0.123907	-1.07774	-0.108016	UNKNOWN
C189R148	0.00278686	0.890456	0.092964	1.21023	0.27528	-1.03624	-0.0513574	-1.11266	-0.154018	-1.25409	-0.326637	-1.12513	-0.170096	-1.05271	-0.0741114	1.19682	0.259202	1.01999	0.0285496	-1.17337	-0.230652	Golgi phosphoprotein 3	66629	Mm.250936
C190R148	0.000181739	0.0838436	0.00186796	1.21517	0.281158	1.01113	0.0159669	-1.01516	-0.0217139	-1.20179	-0.265191	-1.16449	-0.219693	-1.21523	-0.281235	1.05935	0.0831782	-1.18391	-0.243554	-1.25417	-0.326732	Septin-7	989	Hs.191346
C199R148	0.00035815	0.8691	5.06294e-06	2.61813	1.38854	1.53916	0.622143	-2.55242	-1.35187	-1.70101	-0.766394	-3.11424	-1.63888	-2.88108	-1.52661	2.14581	1.10152	1.36358	0.447401	-1.57366	-0.654123	Beta-1,3-glucosyltransferase	145173	Hs.13205
C244R148	0.00831678	0.0567438	0.894006	-1.28743	-0.364497	-1.70786	-0.772189	-1.24698	-0.318441	-1.32656	-0.407693	-1.07126	-0.0993129	1.29744	0.375663	-1.10601	-0.145369	-1.05562	-0.0780856	1.04774	0.0672829	Histidine triad nucleotide-binding protein 3	733971	Str.66503
C248R148	0.00289712	0.0115908	0.000271175	-1.32784	-0.409086	-1.36477	-0.448661	1.09225	0.127299	-1.02781	-0.0395745	1.14326	0.193149	1.98026	0.98569	-1.2686	-0.343236	1.32844	0.40973	1.68525	0.752966	UNKNOWN
C009R149	0.000803929	0.314456	0.687224	-1.2528	-0.325155	-1.17842	-0.236853	1.05847	0.0819803	1.06312	0.0883027	-1.12336	-0.167823	1.15969	0.21374	-1.48964	-0.574959	-1.07556	-0.105093	1.38498	0.469866	101892 PRK05648, PRK05648, DNA polymerase III subunits gamma and tau; Reviewed.
C058R149	3.37333e-05	0.0650993	0.41394	-1.14183	-0.191347	-1.17742	-0.235634	1.09263	0.127806	-1.03117	-0.0442875	1.00713	0.0102545	-1.23441	-0.303825	-1.23876	-0.308898	-1.58806	-0.667266	-1.28197	-0.358367	UNKNOWN
C094R149	0.000437128	0.0870018	0.000520752	1.20052	0.263664	1.34907	0.431962	-1.18463	-0.244437	1.12373	0.168299	-1.06726	-0.0939068	-1.47611	-0.561803	1.33255	0.414194	1.08267	0.114596	-1.2308	-0.299598	UNKNOWN
C178R149	0.000663604	0.589415	0.820946	-1.24919	-0.320995	-1.71938	-0.781888	1.03674	0.0520544	-1.37639	-0.460893	1.17831	0.236719	-1.13428	-0.181771	-1.09911	-0.136331	-2.0219	-1.01571	-1.83959	-0.879383	UNKNOWN
C194R149	0.00978731	0.98911	0.00103737	1.2882	0.365355	-1.01574	-0.0225378	-1.37604	-0.460522	-1.30848	-0.387893	-1.36447	-0.448337	-1.33173	-0.413306	1.29912	0.377539	1.01725	0.0246784	-1.27709	-0.352861	Brain protein 44-like protein	55951	Mm.288510
C063R150	3.11626e-05	0.174029	0.0464062	-1.24659	-0.317982	1.05422	0.0761779	1.00533	0.00766672	1.31418	0.39416	-1.0668	-0.0932868	-1.26371	-0.337662	-1.33694	-0.418935	-1.2051	-0.269151	1.1094	0.149784	Coagulation factor V precursor	397217	Ssc.15822
C074R150	0.00119495	0.517794	1.92843e-08	1.40034	0.485774	1.83517	0.875914	2.58476	1.37003	1.31052	0.390141	3.46856	1.79434	2.57652	1.36542	1.87915	0.910079	1.82932	0.871305	-1.02724	-0.0387737	UNKNOWN
C117R150	0.00856175	0.261511	0.377949	-1.23729	-0.307178	-1.08164	-0.113225	1.02071	0.0295785	1.14389	0.193953	1.04104	0.0580251	-1.26673	-0.341113	-1.21313	-0.278732	-1.39854	-0.483917	-1.15283	-0.205186	UNKNOWN
C150R150	0.00413716	0.995982	0.165072	1.20887	0.27366	-1.06142	-0.085996	-1.08387	-0.116191	-1.28312	-0.359656	-1.09488	-0.130778	-1.09538	-0.131427	1.19671	0.259073	-1.07269	-0.101232	-1.2837	-0.360305	39S ribosomal protein L13, mitochondrial	28998	Hs.333823
C210R150	0.00801839	0.80008	0.415595	-1.14448	-0.19469	-1.31109	-0.390761	-1.00083	-0.00119264	-1.14557	-0.196071	-1.0571	-0.0801142	-1.14862	-0.199901	-1.20883	-0.273612	-1.50469	-0.589469	-1.24475	-0.315857	Peptidyl-prolyl cis-trans isomerase-like 1	100047806; 68816	Mm.328928
C255R150	0.00148687	0.330235	1.26187e-05	1.78524	0.836116	1.27282	0.348028	-1.50354	-0.588361	-1.40259	-0.488089	-2.05659	-1.04025	-1.65957	-0.730806	1.30516	0.384224	1.15315	0.205583	-1.13182	-0.178641	112899 pfam04103, CD20, CD20/IgE Fc receptor beta subunit family. This family includes the CD20 protein and the beta subunit of the high affinity receptor for IgE Fc. The high affinity receptor for IgE is a tetrameric structure consisting of a single ...
C005R151	0.00167843	0.623717	4.71376e-05	1.17644	0.234423	1.04781	0.0673705	-1.2508	-0.322856	-1.12276	-0.167052	-1.19469	-0.256631	-1.35633	-0.439711	1.2317	0.300648	-1.0349	-0.0494849	-1.27468	-0.350133	Probable Bax inhibitor 1
C010R151	0.00017622	0.192104	0.746097	-1.1031	-0.141565	-1.19461	-0.256541	1.08272	0.114654	-1.08296	-0.114977	-1.08841	-0.122229	-1.039	-0.055193	-1.29994	-0.378447	-1.34387	-0.426388	-1.03379	-0.0479409	Cytochrome c	415158	Dr.76432
C046R151	0.00249016	0.894723	0.72571	-1.21927	-0.286021	-1.24539	-0.316599	-1.04225	-0.0597041	-1.02142	-0.0305774	-1.03947	-0.0558449	1.02272	0.0324082	-1.21602	-0.282162	-1.16836	-0.224486	1.04079	0.0576757	Ubiquitin-like protein 4A	8266	Hs.76480
C050R151	3.18714e-05	0.558762	0.259113	1.1772	0.235355	1.35555	0.438879	-1.14235	-0.192004	1.15151	0.203524	-1.02109	-0.0301095	-1.03267	-0.046383	1.31699	0.397249	1.49952	0.5845	1.13859	0.187251	Acetyl-CoA carboxylase	396504	Gga.1480
C196R151	0.000559725	0.510667	1.54146e-05	1.13261	0.179655	1.07424	0.103321	-1.18121	-0.24027	-1.05434	-0.0763337	-1.13219	-0.179122	-1.2528	-0.325162	1.18165	0.240803	1.01286	0.018429	-1.16665	-0.222374	40S ribosomal protein S25	393788	Dr.32370
C219R151	0.00816067	0.0475802	6.87506e-05	-1.15251	-0.204784	-1.2187	-0.285347	1.20758	0.272116	-1.05743	-0.0805627	1.52741	0.611089	1.1346	0.182183	1.09748	0.134189	-1.29709	-0.37528	-1.42353	-0.509468	UNKNOWN
C236R151	0.00323041	0.0227768	0.994632	-1.39069	-0.475797	-1.28927	-0.366551	-1.13259	-0.179631	1.07866	0.109246	1.20849	0.273209	-1.06582	-0.0919703	-1.01604	-0.0229573	-1.21326	-0.278891	-1.19411	-0.255933	UNKNOWN
C255R151	0.000308296	0.349704	0.387692	1.18374	0.243358	1.19378	0.255534	-1.06107	-0.0855224	1.00848	0.0121756	1.07579	0.105403	1.14704	0.197918	1.35124	0.434283	1.45294	0.538974	1.07526	0.104691	UNKNOWN
C012R152	0.0059622	0.590036	0.00704695	1.39655	0.481863	1.33586	0.417767	-1.24309	-0.313931	-1.04543	-0.0640968	-1.43843	-0.524494	-1.17949	-0.238161	1.20689	0.2713	1.40789	0.493537	1.16654	0.222237	109812 pfam00769, ERM, Ezrin/radixin/moesin family. This family of proteins contain a band 4.1 domain (pfam00373), at their amino terminus. This family represents the rest of these proteins.
C024R152	2.7519e-05	0.58805	0.157354	-1.61266	-0.689439	-1.92525	-0.945046	1.41815	0.504006	-1.19384	-0.255607	1.22606	0.294028	1.00391	0.00563538	-1.86531	-0.899417	-2.71964	-1.44342	-1.45801	-0.543999	UNKNOWN
C037R152	0.000147513	0.446492	0.205533	-1.11623	-0.158633	-1.25291	-0.325286	1.01678	0.0240096	-1.12245	-0.166653	-1.06693	-0.0934591	-1.1515	-0.20352	-1.21092	-0.276102	-1.46695	-0.552816	-1.21143	-0.276714	Prefoldin subunit 2	404138	Bt.1544
C044R152	0.00975069	0.102488	0.0601096	-1.03079	-0.0437521	-1.19199	-0.253376	1.03625	0.0513762	-1.15639	-0.209623	-1.34373	-0.42624	-1.19514	-0.257178	-1.43532	-0.521369	-1.47624	-0.56193	-1.02851	-0.040561	Histone H2AV
C077R152	0.000156068	0.574959	0.378191	-1.2072	-0.271669	-1.0879	-0.121546	1.09733	0.133997	1.10966	0.150122	-1.01111	-0.0159333	1.05026	0.0707474	-1.33941	-0.421599	-1.13666	-0.184796	1.17838	0.236803	UNKNOWN
C119R152	0.00136598	0.123233	0.0162437	-1.0999	-0.137368	-1.22596	-0.293917	1.01358	0.0194536	-1.11462	-0.156549	-1.24756	-0.319107	-1.50712	-0.591791	-1.39081	-0.475929	-1.87275	-0.905161	-1.34652	-0.429233	Differentially expressed in FDCP 6 homolog	394015	Dr.26673
C135R152	0.000347863	0.960319	8.64345e-06	-1.29394	-0.371773	-1.06701	-0.0935732	1.31266	0.392494	1.21268	0.2782	1.35312	0.436286	1.34067	0.422953	-1.25526	-0.327981	-1.04472	-0.0631142	1.20152	0.264867	Staphylococcal nuclease domain-containing protein 1	324404	Dr.76177
C197R152	0.00896431	0.348995	0.00486122	1.06072	0.0850458	-1.05147	-0.072402	-1.06395	-0.0894289	-1.11531	-0.157448	-1.08834	-0.122136	-1.23642	-0.30617	1.03694	0.0523389	-1.22191	-0.289143	-1.26706	-0.341482	mRNA export factor	393973	Dr.115501; Dr.75426
C006R153	0.00295416	0.120738	0.673899	-1.07062	-0.0984501	-1.09354	-0.129008	1.05996	0.0840063	-1.02141	-0.0305576	1.04561	0.0643413	-1.16535	-0.220758	-1.08532	-0.118115	-1.35076	-0.433772	-1.24458	-0.315657	Histone H3.3	117056	Rn.124815; Rn.198918; Rn.29857
C009R153	0.00370342	0.277373	0.311174	-1.16402	-0.219112	-1.00951	-0.0136566	1.05553	0.0779641	1.15305	0.205455	-1.21123	-0.27647	-1.09844	-0.13545	-1.48818	-0.573546	-1.17046	-0.227071	1.27145	0.346475	Type I inositol-3,4-bisphosphate 4-phosphatase	80849	Rn.11215
C025R153	0.00230418	0.807216	0.657336	1.28613	0.363032	1.11995	0.163439	-1.0091	-0.0130727	-1.14837	-0.199593	1.09635	0.132706	1.02153	0.0307249	1.42288	0.50881	1.15447	0.207237	-1.23249	-0.301574	UNKNOWN
C097R153	3.7352e-05	0.0884385	0.000172463	1.32737	0.40857	1.29336	0.371126	-1.06159	-0.0862221	-1.02629	-0.037444	-1.18833	-0.248936	-1.35688	-0.440291	1.1858	0.245857	1.01189	0.0170576	-1.17186	-0.228799	Microsomal glutathione S-transferase 3	66447	Mm.218286
C105R153	0.00464391	0.669366	0.0766873	1.24934	0.321171	1.72323	0.785115	-1.0793	-0.1101	1.37931	0.463944	-1.14814	-0.199303	-1.34734	-0.430114	1.17444	0.231968	1.38041	0.465101	1.17538	0.233132	Beta-2 adrenergic receptor
C142R153	0.00452838	0.370052	3.00093e-07	1.38243	0.467209	1.69013	0.757134	2.56932	1.36138	1.22258	0.289925	4.38409	2.13228	4.00982	2.00354	2.35888	1.2381	2.63771	1.39929	1.1182	0.161184	Proteasome subunit beta type-7 precursor	85492	Rn.3846
C177R153	0.00421942	0.758505	0.265139	-1.40208	-0.487566	-1.68875	-0.755959	-1.23688	-0.306702	-1.20447	-0.268393	-1.08751	-0.121028	-1.05043	-0.0709743	-1.23276	-0.301892	-1.43419	-0.520231	-1.16339	-0.218339	Structural maintenance of chromosomes protein 2		Mm.2999
C190R153	0.00253228	0.472245	0.435366	-1.12076	-0.164481	-1.23797	-0.30798	1.0721	0.100437	-1.10458	-0.143499	-1.04079	-0.0576732	1.09423	0.129914	-1.25057	-0.322591	-1.21294	-0.278503	1.03103	0.0440875	Aspartate aminotransferase, mitochondrial precursor	14719	Mm.230169
C196R153	0.0081554	0.93976	0.000181833	1.12707	0.172581	-1.08574	-0.118678	-1.20467	-0.268639	-1.22371	-0.29126	-1.23922	-0.309436	-1.25145	-0.323596	1.09565	0.131785	-1.1279	-0.173635	-1.23578	-0.30542	Eukaryotic translation initiation factor 1b	10289	Hs.315230
C043R154	0.000134307	0.741787	0.00467222	1.31675	0.396982	1.67566	0.744726	1.2308	0.299602	1.27257	0.347744	1.34065	0.422932	1.50104	0.585965	1.43427	0.520312	2.04357	1.03109	1.42482	0.510776	Beta-2-microglobulin precursor
C080R154	0.00730487	0.105593	0.212483	-1.13382	-0.181197	-1.03741	-0.0529819	1.11502	0.157066	1.09294	0.128215	-1.09461	-0.130412	-1.34156	-0.423912	-1.38384	-0.468675	-1.55182	-0.63396	-1.12139	-0.165285	Microtubule-associated protein RP/EB family member 1
C098R154	0.00762051	0.963787	0.0465249	1.50064	0.585583	1.21968	0.286503	-1.35495	-0.43824	-1.23036	-0.29908	-1.2957	-0.373736	-1.24415	-0.315162	1.56926	0.650086	1.3283	0.40958	-1.18141	-0.240506	Forkhead box protein C1	2296	Hs.348883
C105R154	0.00871067	0.653198	0.23837	-1.12214	-0.166259	-1.05377	-0.0755543	1.10199	0.140116	1.06489	0.0907044	1.00915	0.0131352	1.06693	0.0934723	-1.22539	-0.29324	-1.08839	-0.122198	1.12587	0.171041	Apoptosis-inducing factor 1, mitochondrial precursor	83533	Rn.203165
C145R154	0.00537097	0.836727	0.896828	-1.06783	-0.0946801	-1.27147	-0.346503	-1.00909	-0.0130561	-1.19071	-0.251823	-1.0222	-0.0316803	1.04996	0.0703329	-1.0817	-0.113304	-1.20007	-0.263114	-1.10942	-0.14981	Splicing factor, arginine/serine-rich 7	225027	Mm.292016
C194R154	0.000248919	0.263632	0.00233699	-1.64129	-0.714831	-1.61444	-0.69103	1.16752	0.223444	1.01663	0.0238008	1.55474	0.636677	1.29885	0.377234	-1.23251	-0.301599	-1.45119	-0.537241	-1.17743	-0.235642	Glycylpeptide N-tetradecanoyltransferase 1		Bt.88362
C055R155	0.00807106	0.481376	0.000292535	1.40749	0.493122	1.63466	0.708993	-1.26703	-0.341456	1.1614	0.21587	-1.53319	-0.616538	-1.62874	-0.703759	1.16315	0.21804	1.27164	0.34669	1.09327	0.12865	UNKNOWN
C077R155	0.00707922	0.0170962	0.000123171	-1.0029	-0.00418118	-1.05021	-0.0706812	-1.03445	-0.0488689	-1.04717	-0.0665	-1.45784	-0.543835	-1.53203	-0.615445	-1.41338	-0.499147	-1.55537	-0.637257	-1.10046	-0.13811	UNKNOWN
C123R155	0.00139408	0.42447	0.0480906	-1.27533	-0.350875	-1.27743	-0.353249	-1.07761	-0.107838	-1.00165	-0.00237421	-1.0816	-0.113172	-1.39053	-0.475634	-1.28006	-0.356209	-1.64838	-0.721045	-1.28774	-0.364836	HHIP-like protein 1 precursor	214305	Mm.36423
C136R155	0.00267604	0.24172	0.00027498	1.12794	0.173689	1.34274	0.425177	1.26656	0.340921	1.19043	0.251488	1.36061	0.444255	1.08218	0.113935	1.21169	0.277023	1.14726	0.198191	-1.05616	-0.0788319	Radixin	5962	Hs.263671; Hs.592679
C137R155	1.70159e-06	0.410154	0.000499853	-1.38949	-0.474557	-1.40118	-0.486647	1.29602	0.374083	-1.00842	-0.0120907	1.14049	0.189659	1.38183	0.466578	-1.57897	-0.658981	-1.31417	-0.394153	1.20149	0.264828	Tubulin alpha-4A chain	7277	Hs.75318
C144R155	0.00396826	0.0615057	0.00236347	1.54842	0.630798	1.29777	0.376035	-1.11472	-0.156683	-1.19314	-0.254763	-1.5903	-0.669301	-1.18117	-0.240221	1.08537	0.118181	1.22476	0.292497	1.12843	0.174316	Legumain precursor	281281	Bt.8947
C168R155	0.00173064	0.524744	0.00844989	-1.37037	-0.454567	-1.21532	-0.281338	1.3989	0.484291	1.12758	0.173229	1.14903	0.200411	1.49363	0.578826	-1.66838	-0.738447	-1.13824	-0.186803	1.46575	0.551644	EF-hand domain-containing protein D2	514259	Bt.15561
C174R155	8.12114e-06	0.413567	0.596537	-1.40802	-0.493668	-1.23427	-0.303659	1.02527	0.0359971	1.14077	0.190009	1.12212	0.166229	-1.05974	-0.0837056	-1.28649	-0.363436	-1.34105	-0.423361	-1.04241	-0.0599254	26S proteasome non-ATPase regulatory subunit 3	5709	Hs.12970
C202R155	0.00101621	0.579702	0.000395982	1.19879	0.261576	1.0191	0.027291	-1.35208	-0.435186	-1.17632	-0.234285	-1.20881	-0.273587	-1.21116	-0.276391	1.34087	0.423174	1.13767	0.186086	-1.17861	-0.237088	UNKNOWN
C240R155	0.00545657	0.792139	0.873109	-1.25676	-0.329706	-1.16202	-0.216639	-1.02634	-0.0375132	1.08153	0.113068	-1.02524	-0.0359591	1.08539	0.118214	-1.2554	-0.328152	-1.04312	-0.0609117	1.2035	0.26724	UNKNOWN
C030R156	0.0096207	0.969378	0.0753481	-1.00721	-0.0103609	-1.33912	-0.421283	-1.16172	-0.21626	-1.32954	-0.410922	-1.12113	-0.164951	-1.13763	-0.186028	1.02879	0.0409476	-1.31135	-0.391051	-1.3491	-0.431999	Phosphorylase b kinase gamma catalytic chain, skeletal muscle isoform	29353	Rn.10399
C130R156	0.00260064	0.0648852	0.171575	-1.09014	-0.124513	-1.12337	-0.167832	1.13728	0.185582	-1.03048	-0.0433185	-1.22263	-0.289983	-1.27664	-0.352352	-1.5158	-0.600078	-1.63101	-0.705765	-1.07601	-0.105687	Insulin-induced gene 1 protein	334189	Dr.115835
C136R156	0.000976947	0.606499	0.224789	1.97304	0.980418	1.76855	0.822563	-1.02279	-0.0325102	-1.11563	-0.157855	-1.34376	-0.426277	-1.20204	-0.265487	1.50176	0.586651	1.50482	0.589587	1.00204	0.00293568	UNKNOWN
C138R156	5.07396e-05	0.353777	9.54708e-06	1.71047	0.77439	1.49774	0.582783	-1.44106	-0.527131	-1.14203	-0.191606	-1.81772	-0.862126	-1.4618	-0.547742	1.35604	0.439395	1.47649	0.562173	1.08883	0.122778	Annexin A5	428767	Gga.1168
C141R156	0.0068595	0.799264	0.0266657	1.0999	0.137377	1.09853	0.135572	1.07949	0.110353	-1.00125	-0.00180569	1.10304	0.141484	1.04439	0.0626639	1.1239	0.168509	1.06281	0.0878827	-1.05748	-0.080626	Ras-related protein Rab-7a	7879	Hs.15738; Hs.644809
C157R156	0.000304301	0.563004	0.180654	-1.21732	-0.283705	-1.24785	-0.31944	1.06168	0.0863554	-1.02508	-0.0357351	1.00225	0.00324917	1.15252	0.204792	-1.2895	-0.366811	-1.1495	-0.201003	1.12179	0.165808	14-3-3 protein zeta	425619	Gga.8276
C182R156	0.00175242	0.182152	0.000143808	-1.09674	-0.133218	-1.18947	-0.250321	-1.13454	-0.182103	-1.08455	-0.117103	-1.38458	-0.469444	-1.51197	-0.596433	-1.33845	-0.420559	-1.58518	-0.664651	-1.18435	-0.244092	WD repeat-containing protein 55	54853	Hs.286261
C202R156	0.00839176	0.552871	0.722329	1.28712	0.364145	-1.09404	-0.129663	1.06578	0.0919113	-1.40816	-0.493809	-1.07409	-0.103121	1.08547	0.118318	1.12437	0.169113	-1.0742	-0.103256	-1.20779	-0.27237	UNKNOWN
C221R156	0.00143438	0.634174	0.011842	1.19508	0.257109	-1.23544	-0.305027	-1.15694	-0.210315	-1.47645	-0.562137	-1.27042	-0.3453	-1.11137	-0.152343	1.08834	0.122125	-1.18678	-0.247055	-1.29162	-0.369179	NADH dehydrogenase [ubiquinone] 1 beta subcomplex subunit 2, mitochondrial precursor
C232R156	0.0059227	0.844491	0.542403	-1.16276	-0.217548	-1.17559	-0.233391	1.01429	0.0204754	-1.01104	-0.0158427	1.06069	0.08501	1.00714	0.0102661	-1.11189	-0.153013	-1.18394	-0.2436	-1.0648	-0.0905865	Putative pre-mRNA-splicing factor ATP-dependent RNA helicase DHX15	13204	Mm.993
C237R156	0.00214345	0.0304761	0.249951	-1.11361	-0.155243	-1.08352	-0.115719	1.00707	0.01017	1.02777	0.0395237	1.06901	0.0962717	-1.2236	-0.291136	-1.04909	-0.0691413	-1.33517	-0.417026	-1.27269	-0.347884	UNKNOWN
C257R156	0.000304085	0.648537	0.994277	1.55318	0.635226	1.46265	0.548588	1.10298	0.14141	-1.06189	-0.0866383	-1.03999	-0.0565716	-1.05868	-0.0822716	1.35402	0.437245	1.25258	0.324906	-1.08098	-0.112338	RNA 3'-terminal phosphate cyclase-like protein	59028	Mm.28630
C015R157	1.44792e-06	0.492246	0.585046	-1.28955	-0.366863	-1.75787	-0.813829	1.04937	0.0695276	-1.36317	-0.446966	1.0177	0.0253089	-1.2171	-0.283442	-1.32968	-0.411082	-2.24513	-1.1668	-1.68847	-0.755716	Whey acidic protein precursor
C030R157	0.00472589	0.403138	0.133325	-1.47978	-0.565383	-1.21915	-0.285871	1.09849	0.13552	1.21378	0.279512	1.32448	0.405423	1.018	0.0257368	-1.22729	-0.29548	-1.31554	-0.395655	-1.0719	-0.100174	UNKNOWN
C114R157	0.000726627	0.019039	1.23155e-06	1.11222	0.153442	1.27144	0.34646	1.36416	0.448014	1.14315	0.193018	2.48828	1.31515	3.83979	1.94103	2.02873	1.02058	3.57879	1.83947	1.76406	0.818897	Eukaryotic translation initiation factor 4 gamma 3	230861	Mm.268903
C131R157	0.00105646	0.874093	0.476252	1.2639	0.337886	1.39434	0.479578	1.01901	0.0271679	1.1032	0.141692	1.02761	0.0392933	1.12727	0.172832	1.27457	0.350012	1.54247	0.625242	1.21019	0.27523	Non-receptor tyrosine-protein kinase TYK2	7297	Hs.75516
C134R157	2.11002e-06	0.440517	0.29642	-1.5514	-0.633573	-1.53836	-0.621397	1.05648	0.0792721	1.00848	0.0121757	-1.1461	-0.196727	-1.2267	-0.29478	-1.87849	-0.909572	-1.9937	-0.995449	-1.06133	-0.0858776	Farnesyl pyrophosphate synthetase		Gga.42725
C164R157	0.00439633	0.135622	0.000848786	-1.15428	-0.206992	1.03851	0.0545215	1.20252	0.266064	1.19874	0.261513	1.17306	0.230274	1.81719	0.861712	-1.18327	-0.242781	1.56935	0.650169	1.85697	0.892951	ESF1 homolog	366203	Rn.22208
C187R157	0.00117673	0.911706	0.00117336	1.3784	0.462993	1.23968	0.30997	1.3069	0.386144	-1.1119	-0.153022	1.25185	0.324058	1.35443	0.437686	1.32034	0.400907	1.28477	0.361513	-1.02768	-0.039394	Sorting nexin-2	6643	Hs.696016
C194R157	0.000178078	0.470524	0.0686255	1.00597	0.00858974	-1.28379	-0.360409	-1.01665	-0.023818	-1.29146	-0.368998	-1.13669	-0.184835	-1.14065	-0.189857	-1.11144	-0.152427	-1.44038	-0.526448	-1.29596	-0.374021	UNKNOWN
C196R157	3.78493e-05	0.964397	0.0714733	1.12133	0.165208	1.91115	0.934438	-1.23406	-0.303408	1.70436	0.76923	-1.20504	-0.269081	-1.15281	-0.205153	1.14833	0.199535	2.04584	1.03269	1.78158	0.833158	Ig kappa chain V-IV region B17 precursor
C214R157	0.00831963	0.62969	0.794453	-1.10614	-0.145529	-1.19563	-0.25777	1.04923	0.0693278	-1.08091	-0.11224	1.06658	0.0929905	-1.07246	-0.100918	-1.08814	-0.121867	-1.34538	-0.428015	-1.2364	-0.306148	UPF0480 protein C15orf24 homolog
C218R157	0.00549853	0.93548	0.62271	1.24481	0.315921	-1.00171	-0.00245848	-1.00155	-0.0022372	-1.24693	-0.31838	-1.03841	-0.0543729	-1.05774	-0.0809796	1.20063	0.263786	-1.0579	-0.0812009	-1.27014	-0.344986	Tubulin alpha-4A chain	7277	Hs.75318
C245R157	4.446e-05	0.611349	0.0259483	1.59882	0.677004	1.28593	0.362811	-1.23574	-0.305379	-1.24332	-0.314193	-1.33344	-0.415154	-1.07639	-0.106201	1.48168	0.567229	1.4763	0.561989	-1.00364	-0.00524037	GTP cyclohydrolase 1 feedback regulatory protein	393735	Dr.82968
C017R158	0.00363631	0.391215	0.112048	-1.14851	-0.199761	-1.15864	-0.212428	-1.0347	-0.0492149	-1.00882	-0.012667	-1.01748	-0.0250047	-1.21528	-0.281292	-1.1294	-0.175551	-1.36085	-0.444506	-1.20493	-0.268955	Thioredoxin-like protein 1	9352	Hs.114412
C024R158	0.000222542	0.630747	0.954564	1.54432	0.626969	1.86531	0.899419	1.00346	0.00498611	1.20786	0.27245	-1.15996	-0.214073	1.13339	0.180639	1.32676	0.40791	2.10683	1.07507	1.58795	0.667162	Complement C1s subcomponent precursor	192262	Rn.4037
C029R158	0.00087068	0.0226492	0.000443536	1.41851	0.50438	1.86762	0.9012	-1.06186	-0.0865927	1.3166	0.39682	-1.21301	-0.278596	-1.90597	-0.930525	1.24175	0.312377	1.04049	0.0572681	-1.19343	-0.255109	Xaa-Pro aminopeptidase 1	7511	Hs.390623
C121R158	0.00400582	0.161077	0.0716773	-1.24798	-0.319596	-1.06388	-0.0893293	1.24264	0.313408	1.17305	0.230266	1.25157	0.323741	-1.08899	-0.122986	-1.23907	-0.309263	-1.43966	-0.525724	-1.16188	-0.216461	Protein LSM12 homolog A	406422	Dr.76714
C131R158	0.00218708	0.65241	0.00030562	-1.52975	-0.613296	-1.25122	-0.323331	1.35647	0.439853	1.22261	0.289965	1.58851	0.667675	1.37983	0.464494	-1.30629	-0.385474	-1.23003	-0.29869	1.062	0.086784	Plasma membrane calcium-transporting ATPase 2
C181R158	6.09422e-06	0.764792	0.473625	1.60583	0.683315	1.25861	0.331836	1.10317	0.14166	-1.27587	-0.351479	-1.00339	-0.00488052	1.05654	0.0793411	1.45073	0.536775	1.2054	0.269518	-1.20352	-0.267258	6-pyruvoyl tetrahydrobiopterin synthase
C204R158	0.000653186	0.473166	0.39486	1.33156	0.413115	-1.07455	-0.103731	-1.22733	-0.295522	-1.43082	-0.516846	-1.06986	-0.0974284	1.05669	0.0795511	1.52754	0.611209	1.20693	0.271342	-1.26564	-0.339867	Tripartite motif-containing protein 39	309591	Rn.211560
C223R158	8.33246e-09	0.0979549	0.110983	-1.51137	-0.595855	-1.82529	-0.86813	-1.01754	-0.025083	-1.20771	-0.272275	1.03999	0.0565722	-1.44733	-0.533389	-1.4282	-0.514199	-2.59626	-1.37644	-1.81785	-0.862236	Histone H2AV
C228R158	4.287e-09	0.801813	0.148817	-1.52649	-0.610222	-1.9604	-0.971148	-1.05256	-0.0739086	-1.28425	-0.360926	-1.08223	-0.114007	-1.1849	-0.244762	-1.56952	-0.650321	-2.20687	-1.142	-1.40608	-0.49168	Histone H2AV
C076R159	0.00806321	0.181644	0.617389	1.58618	0.66556	1.73895	0.798219	1.28474	0.361479	1.09631	0.132659	-1.19215	-0.253562	1.09967	0.137074	1.03564	0.0505184	1.48845	0.573814	1.43723	0.523295	RAS and EF-hand domain-containing protein homolog	242505	Mm.389582; Mm.414247
C194R159	0.00673534	0.458312	0.199041	1.41936	0.505238	1.35349	0.436687	-1.11386	-0.155568	-1.04866	-0.0685513	-1.31872	-0.399138	1.01395	0.0199804	1.19886	0.261668	1.52863	0.612235	1.27506	0.350567	UNKNOWN
C202R159	0.000447969	0.57842	0.702141	1.04179	0.0590669	-1.15145	-0.203447	1.0327	0.0464209	-1.19957	-0.262514	-1.02933	-0.0417004	-1.04279	-0.060447	-1.02034	-0.0290544	-1.23998	-0.310315	-1.21526	-0.28126	14-3-3 protein beta/alpha-1
C205R159	0.000593296	0.376509	0.0179907	1.20142	0.264743	-1.06045	-0.0846772	-1.03478	-0.0493206	-1.27405	-0.34942	-1.16283	-0.21764	-1.14603	-0.196639	1.06912	0.0964229	-1.17446	-0.231996	-1.25564	-0.328419	Mid1-interacting protein 1	68041	Mm.29429
C207R159	0.000391678	0.971836	0.647086	-1.09992	-0.1374	-1.33183	-0.413407	-1.0283	-0.0402636	-1.21084	-0.276007	-1.00763	-0.0109603	-1.03131	-0.0444804	-1.07781	-0.108097	-1.33573	-0.417624	-1.2393	-0.309527	Flap endonuclease 1-A	394303; 398125	Xl.34968; Xl.440
C213R159	0.000479482	0.73363	0.589542	1.71976	0.782204	1.64357	0.716832	1.01312	0.0188045	-1.04635	-0.0653714	1.01102	0.0158126	-1.24978	-0.321672	1.71619	0.779212	1.29806	0.376356	-1.32212	-0.402856	Lysozyme g
C033R160	0.00860452	0.872707	0.18154	-1.33005	-0.411476	-1.4017	-0.487182	1.06412	0.0896657	-1.05388	-0.0757062	1.11686	0.159448	1.19533	0.25741	-1.26724	-0.341693	-1.24784	-0.319438	1.01555	0.0222553	Integrin beta-like protein 1 precursor	9358	Hs.696554
C188R160	0.00152433	0.0847159	0.627284	-1.02803	-0.0398817	-1.09747	-0.134176	1.0777	0.107955	-1.06754	-0.0942945	1.03532	0.0500748	-1.18418	-0.243892	-1.07011	-0.0977619	-1.40058	-0.486024	-1.30882	-0.388262	BNIP2 motif-containing molecule at the C-terminal region 1
C212R160	0.000259832	0.0560228	0.000546129	1.15925	0.213198	-1.11094	-0.151778	-1.24444	-0.315501	-1.28786	-0.364976	-1.11858	-0.16167	-1.99293	-0.99489	1.28969	0.367029	-1.77912	-0.831167	-2.29453	-1.1982	Phospholipid hydroperoxide glutathione peroxidase, mitochondrial precursor
C218R160	0.00245936	0.369285	0.183793	1.02397	0.0341692	-1.94923	-0.962902	-1.12055	-0.164205	-1.99594	-0.997071	-1.47215	-0.557925	1.00993	0.0142491	-1.28303	-0.35955	-1.72243	-0.784448	-1.34248	-0.424897	Tumor protein D54
C250R160	0.00757394	0.512565	0.34686	1.78678	0.837363	1.41942	0.505298	-1.04168	-0.0589078	-1.25881	-0.332064	-1.38044	-0.465133	-1.01776	-0.0253975	1.3483	0.431138	1.45277	0.538809	1.07749	0.107671	Cystathionine beta-synthase
C254R160	0.000336266	0.792186	0.512539	-1.36237	-0.446115	-1.44029	-0.52636	-1.01487	-0.0212972	-1.0572	-0.0802457	1.06169	0.0863602	1.09106	0.12573	-1.2644	-0.338457	-1.30074	-0.379334	-1.02874	-0.0408764	Histone H3.3	117056	Rn.124815; Rn.198918; Rn.29857
C011R161	0.00968574	0.630738	0.611486	-1.35404	-0.437271	-1.12386	-0.168464	-1.07574	-0.105329	1.20481	0.268808	1.05311	0.0746566	-1.09451	-0.130281	-1.19523	-0.257286	-1.14347	-0.193416	1.04527	0.0638697	RNA exonuclease 4	448635	Str.8400
C018R161	0.00978506	0.445103	0.0488432	1.4253	0.511261	1.24144	0.312016	1.09169	0.126561	-1.1481	-0.199245	1.23231	0.30136	1.75243	0.809358	1.60888	0.686059	1.99282	0.994813	1.23864	0.308753	Tumor necrosis factor receptor superfamily member 1A precursor	21937	Mm.1258; Mm.466360
C090R161	0.00131058	0.262757	0.0208552	-1.25153	-0.323697	-1.21636	-0.282569	1.24982	0.321718	1.02892	0.0411276	1.02229	0.0318109	1.39516	0.480431	-1.53008	-0.613604	-1.08964	-0.123856	1.4042	0.489748	Acidic leucine-rich nuclear phosphoprotein 32 family member B	509685	Bt.7074
C135R161	0.000161773	0.144112	0.568835	1.40303	0.488547	1.44488	0.530954	1.08587	0.118855	1.02983	0.0424066	-1.1598	-0.213878	-1.03202	-0.0454779	1.11405	0.155814	1.28933	0.366621	1.15734	0.210807	Iron-sulfur cluster assembly enzyme ISCU, mitochondrial precursor	66383	Mm.29497
C142R161	6.50722e-06	0.204123	0.994834	-1.17119	-0.227976	-1.21317	-0.278787	1.1043	0.143129	-1.03585	-0.0508112	-1.00371	-0.00534807	-1.0993	-0.136585	-1.29815	-0.376453	-1.47274	-0.558501	-1.13449	-0.182048	Deoxyuridine 5'-triphosphate nucleotidohydrolase, mitochondrial precursor	1854	Hs.527980
C187R161	0.0063555	0.392522	0.0118095	-1.20668	-0.271046	-1.35019	-0.433165	-1.23566	-0.305283	-1.11893	-0.16212	-1.08592	-0.118912	-1.47294	-0.558694	-1.06045	-0.0846747	-1.60946	-0.686576	-1.51772	-0.601901	Probable global transcription activator SNF2L4	6597	Hs.327527
C189R161	0.00136469	0.631928	0.00117926	-1.00422	-0.00607558	-1.21498	-0.280935	-1.17607	-0.233969	-1.20988	-0.27486	-1.13001	-0.17633	-1.28141	-0.357736	1.03639	0.0515639	-1.32382	-0.404702	-1.37199	-0.456266	Histone H3.3	117056	Rn.124815; Rn.198918; Rn.29857
C250R161	0.000973387	0.10251	0.391442	-1.63524	-0.709503	-1.21838	-0.284959	1.10194	0.140043	1.34215	0.424544	1.4014	0.486864	-1.21225	-0.277693	-1.28581	-0.362682	-1.62754	-0.702695	-1.26577	-0.340014	Dachshund homolog 2	93837	Mm.79760
C035R162	0.0016153	0.345991	0.00292138	-1.18114	-0.240186	-1.1392	-0.188026	1.25217	0.324431	1.03682	0.0521596	1.24854	0.320238	1.04267	0.0602789	-1.18458	-0.244379	-1.3681	-0.452178	-1.15493	-0.207799	UNKNOWN
C108R162	0.00439916	0.265221	0.611413	-1.14699	-0.197848	-1.13015	-0.176516	1.08724	0.120672	1.0149	0.0213314	1.00848	0.0121758	-1.20523	-0.269311	-1.23657	-0.306343	-1.48093	-0.566499	-1.19761	-0.260155	112077 pfam03247, Prothymosin, Prothymosin/parathymosin family. Prothymosin alpha and parathymosin are two ubiquitous small acidic nuclear proteins that are thought to be involved in cell cycle progression, proliferation, and cell differentiation.
C124R162	0.00167105	0.54852	0.290273	1.22184	0.289061	1.23412	0.303486	1.10579	0.145073	1.01005	0.0144252	1.10261	0.140924	-1.03701	-0.0524327	1.21834	0.284913	1.07623	0.105981	-1.13205	-0.178931	Brain protein 16	59053	Mm.133202
C178R162	0.00051807	0.160715	0.0539868	-1.16966	-0.226085	-1.25674	-0.329692	1.02822	0.0401431	-1.07446	-0.103607	1.18676	0.247032	1.03421	0.0485324	-1.0134	-0.0191968	-1.24946	-0.321303	-1.23294	-0.302106	FERM, RhoGEF and pleckstrin domain-containing protein 1	10160	Hs.403917
C192R162	4.63815e-06	0.365407	5.14487e-06	1.34789	0.430702	1.07988	0.110865	-1.56895	-0.649802	-1.24819	-0.319837	-1.3137	-0.393632	-1.37581	-0.460278	1.60979	0.686873	1.23148	0.300389	-1.3072	-0.386484	Microsomal glutathione S-transferase 3	66447	Mm.218286
C210R162	0.000803997	0.14409	0.00855337	-1.1588	-0.212635	-1.46423	-0.550145	-1.33405	-0.415811	-1.26357	-0.33751	-1.0161	-0.0230434	-1.44038	-0.526451	1.13299	0.180132	-1.58094	-0.660785	-1.79119	-0.840918	SWI/SNF-related matrix-associated actin-dependent regulator of chromatin subfamily E member 1	6605	Hs.696086
C212R162	0.00303411	0.2565	0.00316191	1.05253	0.0738628	-1.13179	-0.1786	-1.11929	-0.162582	-1.19124	-0.252463	-1.12002	-0.163527	-1.44187	-0.52794	1.05184	0.0729174	-1.45797	-0.543958	-1.53355	-0.616876	UNKNOWN
C038R163	0.00768836	0.583687	0.0936839	-1.20789	-0.272491	-1.01917	-0.0273966	1.15065	0.20245	1.18517	0.245094	1.15392	0.206545	1.00154	0.00222578	-1.20447	-0.268396	-1.1709	-0.227621	1.02867	0.0407747	Replication protein A 14 kDa subunit	68240	Mm.29073
C088R163	0.000209694	0.729278	0.959433	1.2764	0.352075	1.23454	0.303979	1.01407	0.0201573	-1.0339	-0.0480965	1.05696	0.079921	-1.06274	-0.087792	1.33038	0.411839	1.14554	0.196029	-1.16136	-0.21581	Protein phosphatase 1 regulatory subunit 15A	23645	Hs.631593
C106R163	0.00682745	0.488744	0.832277	1.2255	0.293373	1.36712	0.451144	1.05388	0.0757065	1.11556	0.15777	1.11882	0.161972	-1.12578	-0.170926	1.30102	0.379638	1.1523	0.204512	-1.12906	-0.175127	Short transient receptor potential channel 7	57113	Hs.591263
C113R163	2.05787e-05	0.731018	0.00911356	1.61506	0.691589	1.48643	0.571853	-1.14664	-0.197412	-1.08654	-0.119736	-1.26009	-0.333527	-1.32562	-0.406664	1.46965	0.555474	1.28574	0.362601	-1.14304	-0.192873	Riboflavin-binding protein precursor	396449	Gga.125
C175R163	0.00099529	0.514784	0.895064	-1.47416	-0.559891	-1.71829	-0.780975	1.08939	0.123515	-1.16561	-0.221085	-1.19736	-0.259856	1.15874	0.212562	-1.92287	-0.943262	-1.61544	-0.691928	1.19031	0.251334	Structural maintenance of chromosomes protein 3	9126	Hs.24485
C227R163	8.20643e-05	0.357801	0.122443	1.65131	0.723613	-1.10843	-0.148514	1.02857	0.0406393	-1.83036	-0.872128	-1.19223	-0.25366	-1.47282	-0.558586	1.34659	0.429314	-1.67916	-0.74774	-2.26114	-1.17705	Tissue factor pathway inhibitor 2 precursor	360007	Bt.29514
C236R163	0.000185977	0.381616	0.00480572	2.64986	1.40592	1.28503	0.3618	1.52049	0.604534	-2.06211	-1.04412	1.36665	0.450643	2.73698	1.45259	2.38176	1.25203	2.31314	1.20985	-1.02967	-0.0421758	Galectin-3-binding protein precursor	3959	Hs.514535
C254R163	0.000102475	0.252962	0.216788	-1.15202	-0.20416	-1.35388	-0.437096	1.04045	0.0572132	-1.17522	-0.232935	-1.19135	-0.252603	-1.11092	-0.151756	-1.42798	-0.513976	-1.56489	-0.646065	-1.09588	-0.132089	C-X-C motif chemokine 14 precursor	9547	Hs.483444
C047R164	0.00213698	0.357312	0.191313	-1.2714	-0.346423	-1.32007	-0.400618	-1.00535	-0.00769329	-1.03828	-0.054195	1.1625	0.217231	1.07022	0.0979094	-1.08786	-0.121499	-1.2269	-0.295015	-1.1278	-0.173516	Rho-related GTP-binding protein RhoG precursor	391	Hs.501728
C055R164	0.00309	0.180499	0.0375383	-1.06213	-0.0869544	-1.23018	-0.298875	-1.1175	-0.160274	-1.15823	-0.211921	1.0018	0.00260121	-1.4294	-0.515405	1.05403	0.0759205	-1.57353	-0.654007	-1.65856	-0.729927	G protein pathway suppressor 2	2874	Hs.438219
C102R164	2.33353e-06	0.974824	0.575563	-1.73702	-0.796617	-1.93256	-0.950516	-1.03617	-0.051266	-1.11257	-0.153899	-1.08449	-0.117013	-1.05571	-0.0782107	-1.81801	-0.862364	-1.969	-0.977461	-1.08305	-0.115097	Ribonucleoside-diphosphate reductase subunit M2	30733	Dr.75098; Dr.75709
C128R164	0.00764097	0.0340865	0.854819	-1.16955	-0.225954	1.00749	0.0107715	1.17135	0.228172	1.17832	0.236725	1.1266	0.171974	-1.27831	-0.354241	-1.21601	-0.282152	-1.48621	-0.571641	-1.22221	-0.28949	UNKNOWN
C131R164	0.00598776	0.960004	0.354663	-1.26783	-0.342365	-1.14394	-0.194011	1.03726	0.0527723	1.1083	0.148354	1.07201	0.100318	1.07339	0.102169	-1.22673	-0.29482	-1.10544	-0.144615	1.10973	0.150205	Tubulin beta chain
C158R164	0.000300692	0.574892	0.0124506	1.72069	0.782987	1.66565	0.736083	-1.1406	-0.189792	-1.03305	-0.0469043	-1.3433	-0.425781	-1.47361	-0.559357	1.46104	0.546998	1.28924	0.366517	-1.13326	-0.180481	Peroxiredoxin
C204R164	0.000110198	0.596006	0.000490755	1.47979	0.565392	1.26908	0.343787	-1.1886	-0.249268	-1.16603	-0.221605	-1.32693	-0.408095	-1.38752	-0.472513	1.32553	0.406565	1.08714	0.120543	-1.21927	-0.286023	CD63 antigen	12512	Mm.277857; Mm.371552
C217R164	1.07629e-05	0.140072	2.17234e-05	1.05531	0.0776627	-1.24661	-0.318015	-1.32113	-0.401767	-1.31556	-0.395678	-1.13271	-0.179777	-1.46378	-0.549701	1.23085	0.299653	-1.38123	-0.465949	-1.70008	-0.765602	DNA-binding protein inhibitor ID-1	3397	Hs.504609
C048R165	1.99174e-05	0.35846	0.00249005	1.53233	0.615723	2.08365	1.05911	1.23739	0.307304	1.3598	0.443392	1.81697	0.861538	1.77441	0.827342	2.25005	1.16996	2.98794	1.57915	1.32795	0.409196	UNKNOWN
C103R165	0.00730522	0.249814	0.000869229	1.28145	0.357782	1.40867	0.494336	-1.10287	-0.141261	1.09928	0.136553	-1.33961	-0.421816	-1.32779	-0.409026	1.05499	0.0772269	1.17005	0.22657	1.10906	0.149343	Vacuolar ATP synthase subunit e 1	338075	Bt.2450
C152R165	0.000151439	0.367601	0.714793	-1.1486	-0.19987	-1.18602	-0.246132	1.09388	0.129449	-1.03259	-0.0462613	1.03683	0.0521796	-1.0803	-0.11143	-1.21179	-0.277139	-1.40154	-0.487011	-1.15659	-0.209871	Heterogeneous nuclear ribonucleoprotein K	426516	Gga.42749
C158R165	1.33008e-05	0.4192	0.603884	-1.27551	-0.351079	-1.50034	-0.58529	1.07647	0.10631	-1.17626	-0.234211	-1.00323	-0.00465912	-1.20449	-0.268425	-1.3775	-0.462048	-1.94534	-0.960025	-1.41223	-0.497977	Aspartate aminotransferase, cytoplasmic	396261	Gga.730
C165R165	0.00178235	0.537139	0.942213	-1.34496	-0.427566	-1.08838	-0.122188	1.10648	0.145984	1.23574	0.305377	1.05446	0.0765024	-1.14633	-0.197017	-1.41132	-0.497047	-1.3805	-0.465189	1.02233	0.0318578	Iron-responsive element-binding protein 2	64831	Rn.10132
C173R165	0.00543532	0.564003	1.07024e-05	1.3179	0.398236	1.01424	0.0204	-1.42488	-0.510838	-1.29939	-0.377836	-1.55641	-0.638219	-1.29676	-0.374908	1.20652	0.270856	1.11445	0.15633	-1.08262	-0.114525	Eukaryotic translation initiation factor 3 subunit K	515326	Bt.53466
C194R165	2.22563e-06	0.395691	0.383282	-1.57415	-0.65457	-2.01031	-1.00742	1.09645	0.132838	-1.27708	-0.352847	-1.23165	-0.300587	-1.2069	-0.271309	-2.12578	-1.08799	-2.66025	-1.41156	-1.25142	-0.323569	PCNA-associated factor	9768	Hs.81892
C203R165	0.000159169	0.333639	0.00217764	-1.03922	-0.0554994	-1.34711	-0.429869	-1.25042	-0.322414	-1.29627	-0.37437	-1.08369	-0.115952	-1.30768	-0.387006	1.11031	0.150963	-1.4088	-0.494462	-1.5642	-0.645424	Nucleophosmin	614028	Bt.61659
C236R165	5.38493e-05	0.534499	0.90598	1.23974	0.310036	1.36968	0.453841	-1.04027	-0.0569634	1.10482	0.143805	1.09244	0.127559	-1.02813	-0.04002	1.40889	0.494559	1.38586	0.470784	-1.01662	-0.0237745	Non-receptor tyrosine-protein kinase TYK2	7297	Hs.75516
C038R166	0.00693339	0.590557	0.0652404	-1.3714	-0.455645	1.014	0.0200596	1.2356	0.305216	1.3906	0.475705	1.29431	0.372187	1.02501	0.0356329	-1.30919	-0.388674	-1.18881	-0.249523	1.10126	0.13915	Pre-mRNA-processing factor 40 homolog A		Hs.643580
C039R166	0.00175892	0.147865	0.0190229	-1.099	-0.136194	-1.09332	-0.128716	-1.02781	-0.0395695	1.0052	0.00747805	-1.03415	-0.0484469	-1.23342	-0.302669	-1.10579	-0.145071	-1.31204	-0.391816	-1.18653	-0.246744	Ras-related protein Rab-11B
C114R166	0.00687427	0.787493	0.660778	1.13294	0.180072	-1.02089	-0.0298223	-1.02428	-0.0346068	-1.1566	-0.209895	1.02262	0.0322699	-1.06812	-0.0950744	1.18669	0.246949	-1.06458	-0.0902899	-1.26334	-0.337239	UNKNOWN
C135R166	0.00250036	0.404352	0.0840255	-1.33064	-0.412122	-1.37727	-0.461809	-1.08019	-0.111283	-1.03504	-0.0496867	-1.06509	-0.0909758	-1.51451	-0.598855	-1.31204	-0.391815	-1.93104	-0.949381	-1.47178	-0.557566	Insulinoma-associated protein 1	53626	Mm.379070
C157R166	0.00456202	0.91718	0.411312	-1.22976	-0.298379	-1.02549	-0.0363104	1.08217	0.113926	1.1992	0.262068	1.06198	0.0867631	1.01243	0.0178184	-1.25313	-0.325541	-1.09613	-0.132418	1.14324	0.193123	Sodium/potassium-transporting ATPase subunit beta-233
C184R166	0.00176342	0.0741628	0.000124721	-1.054	-0.0758801	-1.26493	-0.339059	-1.45462	-0.540645	-1.20012	-0.263179	-1.11057	-0.151299	-1.73977	-0.798898	1.24269	0.313466	-1.5129	-0.597312	-1.88006	-0.910779	Hydroxyacyl-coenzyme A dehydrogenase, mitochondrial precursor	3033	Hs.438289
C059R167	5.59108e-05	0.814969	0.360159	1.71815	0.780853	1.52216	0.606119	-1.06578	-0.0919163	-1.12876	-0.174734	-1.18433	-0.244069	-1.03675	-0.0520633	1.54617	0.6287	1.56479	0.645972	1.01204	0.0172717	Cathepsin K precursor	513038	Bt.23218
C083R167	7.91374e-05	0.898491	0.529454	-1.25956	-0.332919	-1.63782	-0.711779	1.10448	0.143371	-1.30031	-0.37886	1.05771	0.0809461	1.00116	0.00166684	-1.31526	-0.395344	-1.80686	-0.853483	-1.37377	-0.458139	Whey acidic protein precursor
C109R167	0.000278784	0.996485	0.000115522	1.63745	0.711448	1.54633	0.628845	-1.60084	-0.678828	-1.05893	-0.0826034	-1.63019	-0.705036	-1.6174	-0.693675	1.60797	0.685241	1.53049	0.613998	-1.05062	-0.0712427	Lipoprotein lipase precursor	280843	Bt.5387
C123R167	0.00772154	0.353795	0.0403381	-1.31372	-0.393653	-1.29105	-0.368545	1.12177	0.16578	1.01756	0.0251083	1.33425	0.416034	1.05797	0.0812998	-1.1045	-0.143399	-1.36891	-0.453025	-1.23939	-0.309626	Calcium-activated potassium channel subunit alpha-1	3778	Hs.144795
C172R167	0.00648313	0.447287	0.754246	-1.12219	-0.16632	-1.14413	-0.194245	1.01349	0.019328	-1.01954	-0.0279244	1.07663	0.106521	-1.05241	-0.0736913	-1.05638	-0.0791269	-1.22032	-0.287264	-1.1552	-0.208137	Transforming protein RhoA precursor	11848	Mm.757
C179R167	0.00985887	0.884318	2.43795e-05	1.17811	0.236472	-1.00165	-0.0023819	-1.3882	-0.473211	-1.18005	-0.238854	-1.32882	-0.410147	-1.29686	-0.375022	1.23075	0.299536	1.06866	0.0958069	-1.15167	-0.203729	60S ribosomal protein L3	6122	Hs.119598
C193R167	0.00341904	0.303083	0.6403	1.20495	0.268968	1.04864	0.0685217	1.05912	0.0828629	-1.14905	-0.200447	1.03678	0.052109	-1.19246	-0.253944	1.17953	0.238214	-1.20438	-0.268285	-1.4206	-0.5065	Nucleolar complex protein 4 homolog	554096	Dr.32197
C024R168	0.000248802	0.105297	3.65692e-05	1.52332	0.607223	1.47359	0.559336	-1.14024	-0.189339	-1.03375	-0.0478867	-1.44586	-0.531931	-1.56536	-0.646496	1.20133	0.264631	1.07339	0.102179	-1.11919	-0.162452	CD63 antigen	12512	Mm.277857; Mm.371552
C034R168	0.00451627	0.871043	0.976433	1.12268	0.166941	2.24365	1.16585	1.11691	0.15951	1.99849	0.998907	-1.01323	-0.0189596	-1.0871	-0.120489	-1.00802	-0.0115288	1.84785	0.885849	1.86268	0.897378	Thyroliberin type A precursor
C036R168	0.00015155	0.812428	0.945907	-1.41525	-0.50106	-1.60267	-0.680477	1.08558	0.118461	-1.13243	-0.179417	1.02203	0.0314377	-1.08747	-0.120973	-1.50325	-0.588083	-1.892	-0.919911	-1.25861	-0.331828	Cytochrome P450 4B1	24307	Rn.86651
C059R168	3.04369e-05	0.318636	0.0210651	1.22043	0.287387	1.24128	0.311824	-1.27203	-0.347128	1.01708	0.024437	-1.08497	-0.117649	-1.08622	-0.119315	1.43084	0.516867	1.45361	0.539637	1.01591	0.0227704	mRNA turnover protein 4 homolog	51154	Hs.463797
C068R168	4.59861e-08	0.14018	1.11862e-08	3.12871	1.64557	1.20617	0.270432	-2.20738	-1.14233	-2.59393	-1.37514	-3.41719	-1.77281	-2.12689	-1.08875	2.02103	1.01509	1.25181	0.32402	-1.61448	-0.691072	Beta-1,3-glucosyltransferase	145173	Hs.13205
C203R168	0.00135089	0.0250411	0.00175042	-1.01078	-0.0154672	-1.12801	-0.17378	-1.23653	-0.306303	-1.11598	-0.158313	1.01162	0.0166682	-1.60293	-0.680707	1.23756	0.307504	-1.46224	-0.548184	-1.80962	-0.855688	UNKNOWN
C206R168	2.63308e-06	0.151982	0.026684	-1.31595	-0.396103	-1.81405	-0.859216	1.10886	0.149073	-1.37851	-0.463113	1.43284	0.51888	1.05259	0.0739501	-1.01839	-0.0262961	-1.91102	-0.934339	-1.8765	-0.908043	UNKNOWN
C212R168	3.8497e-05	0.0740501	0.0252115	1.02402	0.0342432	-1.27252	-0.347685	1.04011	0.0567376	-1.30308	-0.381928	-1.14987	-0.201471	-1.38457	-0.469441	-1.16794	-0.223965	-1.83256	-0.873864	-1.56906	-0.649899	FK506-binding protein 2 precursor	14227	Mm.4234
C247R168	0.000659383	0.322351	0.651385	-1.46541	-0.551305	-1.57044	-0.651168	-1.18612	-0.246246	-1.07167	-0.0998628	1.05097	0.0717264	1.01912	0.0273263	-1.17555	-0.233332	-1.29917	-0.377595	-1.10517	-0.144263	Tubulin alpha chain
C024R169	0.00295501	0.194577	0.00552256	1.09337	0.128778	-1.05159	-0.0725755	-1.03288	-0.0466758	-1.14978	-0.201354	-1.10842	-0.148508	-1.26216	-0.335892	1.01885	0.0269465	-1.28502	-0.361792	-1.30925	-0.388738	Cytochrome c oxidase polypeptide VIa, mitochondrial precursor
C033R169	0.00382948	0.0450284	0.0059304	-1.53742	-0.620516	-1.29991	-0.378406	-1.01159	-0.0166221	1.18272	0.242109	1.40291	0.48842	1.33265	0.414294	-1.08333	-0.115474	1.03707	0.0525096	1.12349	0.167983	Acidic leucine-rich nuclear phosphoprotein 32 family member B	509685	Bt.7074
C037R169	0.000558239	0.603884	6.76503e-05	2.18882	1.13015	1.67681	0.745716	-1.64088	-0.714466	-1.30535	-0.384434	-2.09769	-1.0688	-2.29815	-1.20047	1.71215	0.775812	1.19724	0.259709	-1.43009	-0.516103	Peroxiredoxin
C039R169	0.00681357	0.246143	0.0105601	-1.32078	-0.401394	-1.16274	-0.217532	1.09698	0.133534	1.13592	0.183863	1.31211	0.391885	1.0992	0.136456	-1.10423	-0.143042	-1.16039	-0.214609	-1.05086	-0.0715669	UNKNOWN
C064R169	6.41e-05	0.0604419	0.117608	1.20151	0.264843	1.18036	0.239226	1.03825	0.0541504	-1.01791	-0.0256171	-1.02559	-0.0364557	-1.16427	-0.21943	1.12837	0.174237	-1.0241	-0.0343543	-1.15556	-0.208591	Serine incorporator 1	294421	Rn.2078
C092R169	0.00160628	0.421014	0.963802	-1.25726	-0.330282	-1.26864	-0.343281	-1.04417	-0.0623634	-1.00905	-0.0129994	1.08945	0.123602	-1.03607	-0.0511247	-1.10521	-0.144317	-1.25879	-0.332043	-1.13897	-0.187726	UNKNOWN
C107R169	0.00303645	0.84086	0.0492835	1.59475	0.673334	1.20486	0.26887	-1.16077	-0.21508	-1.3236	-0.404464	-1.31629	-0.396482	-1.26573	-0.339968	1.40633	0.491932	1.10495	0.143983	-1.27275	-0.34795	Proteolipid protein 2	5355	Hs.77422
C113R169	0.005361	0.201213	0.000135943	1.125	0.169929	1.07991	0.110909	-1.16026	-0.21445	-1.04176	-0.0590193	-1.11	-0.150557	-1.36535	-0.44927	1.17595	0.233821	-1.08969	-0.123911	-1.28141	-0.357732	Epsilon-sarcoglycan precursor	407209	Bt.30480
C120R169	0.000653018	0.341581	0.17198	-1.30526	-0.384341	-1.1688	-0.225027	1.08739	0.120867	1.11676	0.159313	1.19147	0.252737	-1.03318	-0.0470877	-1.19124	-0.25247	-1.3131	-0.392982	-1.1023	-0.140512	UNKNOWN
C125R169	0.0036865	0.012288	0.168576	-1.42799	-0.513984	-1.15267	-0.204976	1.01397	0.0200214	1.23885	0.309007	1.23727	0.307159	-1.95532	-0.967402	-1.17027	-0.226846	-2.28533	-1.1924	-1.95281	-0.965553	UNKNOWN
C140R169	0.0035407	0.641492	0.162701	-1.23123	-0.300104	-1.3238	-0.404682	1.27372	0.349051	-1.07518	-0.104578	1.09883	0.135963	1.05746	0.0805987	-1.42721	-0.513193	-1.59453	-0.673135	-1.11724	-0.159942	UNKNOWN
C152R169	0.00226869	0.237552	0.0292908	1.17127	0.228078	1.04491	0.0633732	-1.11843	-0.16148	-1.12094	-0.164705	-1.01517	-0.0217262	-1.34704	-0.429797	1.29041	0.367832	-1.15264	-0.204943	-1.48738	-0.572775	PEST proteolytic signal-containing nuclear protein	615197	Bt.9809
C221R169	0.00320201	0.39255	0.00797821	-1.17756	-0.235796	-1.48467	-0.570144	-1.3529	-0.436059	-1.26081	-0.334347	-1.09786	-0.134689	-1.30419	-0.383159	1.0465	0.0655738	-1.43122	-0.517244	-1.49777	-0.582817	Tetraspanin-3	10099	Hs.5062; Hs.592528
C034R170	0.00640392	0.166353	0.476834	-1.17904	-0.237616	-1.1771	-0.235236	-1.03544	-0.0502411	1.00165	0.00238032	1.09281	0.128042	-1.17813	-0.236499	-1.04198	-0.0593333	-1.33931	-0.421493	-1.28535	-0.36216	SAPS domain family member 3	423116	Gga.7672
C037R170	5.27982e-05	0.0721928	5.05062e-05	1.34588	0.42855	-1.10196	-0.140074	-1.13083	-0.177383	-1.48311	-0.568624	-1.41098	-0.496693	-1.74923	-0.80672	1.07866	0.10924	-1.70457	-0.769411	-1.83866	-0.878651	Electron transfer flavoprotein subunit alpha, mitochondrial precursor	521892	Bt.5350
C047R170	0.00459683	0.53993	0.0504532	1.05943	0.0832832	-1.22731	-0.295494	-1.10166	-0.139678	-1.30024	-0.378778	-1.08686	-0.120169	-1.36057	-0.444216	1.07385	0.102792	-1.51575	-0.600032	-1.62769	-0.702824	Histone H1.0	407939	Str.4764
C071R170	0.00461081	0.0313521	0.0064087	-1.13106	-0.177673	-1.09937	-0.136676	-1.09584	-0.132043	1.02882	0.0409972	1.01748	0.0249965	-1.2943	-0.372169	-1.0144	-0.0206334	-1.29846	-0.376802	-1.28002	-0.356168	COP9 signalosome complex subunit 4	325592	Dr.77245
C095R170	0.00175047	0.167069	2.04297e-07	1.27323	0.34849	-1.01154	-0.0165491	-1.25418	-0.326745	-1.28792	-0.365039	-1.51429	-0.598642	-1.52298	-0.606901	1.05453	0.0765942	-1.22834	-0.296704	-1.29531	-0.373299	88293 cd05022, S-100A13, S-100A13: S-100A13 domain found in proteins similar to S100A13. S100A13 is a calcium-binding protein belonging to a large S100 vertebrate-specific protein family within the EF-hand superfamily of calcium-binding proteins. Note ...
C135R170	0.00799365	0.207838	0.256469	-1.06917	-0.0964903	-1.06485	-0.0906444	1.15603	0.209184	1.00406	0.00584589	-1.01692	-0.0242018	1.02811	0.0400014	-1.25691	-0.329876	-1.19733	-0.259827	1.04975	0.0700491	28S ribosomal protein S18a, mitochondrial precursor	55168	Hs.520149

## Sheet: MFX-polyIC-2043
Spot ID	p-value(IHNV status)	p-value(IHNV status-polyIC)	p-value(polyIC)	Fold change([control-survivor] vs [control-naive])	Log Fold change([control-survivor] vs [control-naive])	Fold change([control-z_carrier] vs [control-naive])	Log Fold change([control-z_carrier] vs [control-naive])	Fold change([polyIC-naive] vs [control-naive])	Log Fold change([polyIC-naive] vs [control-naive])	Fold change([control-z_carrier] vs [control-survivor])	Log Fold change([control-z_carrier] vs [control-survivor])	Fold change([polyIC-survivor] vs [control-survivor])	Log Fold change([polyIC-survivor] vs [control-survivor])	Fold change([polyIC-z_carrier] vs [control-z_carrier])	Log Fold change([polyIC-z_carrier] vs [control-z_carrier])	Fold change([polyIC-survivor] vs [polyIC-naive])	Log Fold change([polyIC-survivor] vs [polyIC-naive])	Fold change([polyIC-z_carrier] vs [polyIC-naive])	Log Fold change([polyIC-z_carrier] vs [polyIC-naive])	Fold change([polyIC-z_carrier] vs [polyIC-survivor])	Log Fold change([polyIC-z_carrier] vs [polyIC-survivor])	Description	GeneId	UniGene
C206R003	0.0434432	0.180298	6.78221e-08	1.02347	0.0334666	-1.15325	-0.2057	1.54095	0.623822	-1.18031	-0.239166	2.1162	1.08147	1.81836	0.862637	1.40553	0.491118	1.02322	0.0331163	-1.37364	-0.458002	[Protein ADP-ribosylarginine] hydrolase	11544	Mm.20047
C028R009	0.378701	0.392501	9.13122e-08	-1.02495	-0.0355574	1.04572	0.064499	1.55628	0.638099	1.07182	0.100056	1.93808	0.954631	1.88241	0.912585	1.21502	0.280975	1.26487	0.338985	1.04103	0.05801	[Protein ADP-ribosylarginine] hydrolase	11544	Mm.20047
C048R078	0.663678	0.616948	0.000375595	1.11545	0.157624	1.06272	0.0877576	-1.23653	-0.306302	-1.04962	-0.0698661	-1.39012	-0.475212	-1.24207	-0.312749	-1.00785	-0.0112869	1.05798	0.08131	1.06629	0.0925969	1,2-dihydroxy-3-keto-5-methylthiopentene dioxygenase	324079	Dr.26944
C072R011	0.00150569	0.154884	0.00369423	-1.21831	-0.284881	-1.02864	-0.0407438	1.11489	0.156903	1.18438	0.244137	1.10807	0.148048	1.55488	0.636806	-1.22581	-0.293736	1.35581	0.43916	1.66197	0.732895	103038 PRK07764, PRK07764, DNA polymerase III subunits gamma and tau; Validated.
C036R068	0.679141	0.0627326	7.01614e-07	-1.18318	-0.242665	1.10159	0.139588	1.71459	0.777867	1.30337	0.382252	2.88235	1.52725	1.71464	0.777904	1.42081	0.506716	1.10162	0.139625	-1.28975	-0.367091	105544 PRK12323, PRK12323, DNA polymerase III subunits gamma and tau; Provisional.
C012R152	0.0059622	0.590036	0.00704695	1.39655	0.481863	1.33586	0.417767	-1.24309	-0.313931	-1.04543	-0.0640968	-1.43843	-0.524494	-1.17949	-0.238161	1.20689	0.2713	1.40789	0.493537	1.16654	0.222237	109812 pfam00769, ERM, Ezrin/radixin/moesin family. This family of proteins contain a band 4.1 domain (pfam00373), at their amino terminus. This family represents the rest of these proteins.
C038R057	0.00621768	0.701658	0.00267368	-1.19853	-0.261271	1.12323	0.167654	1.16162	0.216137	1.34623	0.428925	1.28378	0.360396	1.31147	0.39119	-1.08449	-0.117012	1.26813	0.342707	1.37527	0.459719	110496 pfam01498, Transposase_5, Transposase. Transposase proteins are necessary for efficient DNA transposition. This family includes the amino-terminal region of Tc1, Tc1A, Tc1B and Tc2B transposases of C.elegans. The region encompasses the specific...
C126R102	0.0129443	0.0914622	0.000855997	-1.68863	-0.755854	-1.33011	-0.411548	1.08675	0.120025	1.26954	0.344306	1.62866	0.703686	1.8704	0.903343	-1.12677	-0.172193	1.29394	0.37177	1.45797	0.543963	111005 pfam02063, MARCKS, MARCKS family.
C025R152	0.133835	0.478602	0.00182399	-1.48392	-0.569409	-1.16114	-0.215537	1.29744	0.375669	1.27799	0.353872	1.74473	0.803005	1.51647	0.600721	-1.10349	-0.142073	1.00662	0.00951427	1.11079	0.151588	111634 pfam02758, PAAD_DAPIN, PAAD/DAPIN/Pyrin domain. This domain is predicted to contain 6 alpha helices and to have the same fold as the pfam00531 domain. This similarity may mean that this is a protein-protein interaction domain.
C244R049	0.00770894	0.0356145	0.00586034	-1.18942	-0.250254	-1.16412	-0.21924	-1.17067	-0.227339	1.02173	0.0310142	1.01506	0.0215694	-1.69818	-0.763989	-1.00093	-0.00134563	-1.68867	-0.75589	-1.6871	-0.754545	112077 pfam03247, Prothymosin, Prothymosin/parathymosin family. Prothymosin alpha and parathymosin are two ubiquitous small acidic nuclear proteins that are thought to be involved in cell cycle progression, proliferation, and cell differentiation.
C076R158	0.211908	0.861531	0.00558147	1.02458	0.0350355	1.23354	0.302803	-1.21318	-0.278792	1.20394	0.267768	-1.18811	-0.248666	-1.3161	-0.396273	1.0462	0.065162	1.13707	0.185322	1.08686	0.12016	112106 pfam03276, Gag_spuma, Spumavirus gag protein.
C255R150	0.00148687	0.330235	1.26187e-05	1.78524	0.836116	1.27282	0.348028	-1.50354	-0.588361	-1.40259	-0.488089	-2.05659	-1.04025	-1.65957	-0.730806	1.30516	0.384224	1.15315	0.205583	-1.13182	-0.178641	112899 pfam04103, CD20, CD20/IgE Fc receptor beta subunit family. This family includes the CD20 protein and the beta subunit of the high affinity receptor for IgE Fc. The high affinity receptor for IgE is a tetrameric structure consisting of a single ...
C165R065	0.575695	0.690716	0.00994584	1.2121	0.277512	1.1379	0.186378	-1.19322	-0.254859	-1.06521	-0.0911332	-1.4157	-0.501518	-1.35983	-0.443431	1.02162	0.0308529	-1.00152	-0.00219339	-1.02317	-0.0330462	113968 pfam05217, STOP, STOP protein. Neurons contain abundant subsets of highly stable microtubules that resist de-polymerising conditions such as exposure to the cold. Stable microtubules are thought to be essential for neuronal development, mainten...
C249R059	0.0704019	0.523989	0.00262796	-1.28792	-0.365038	-1.2083	-0.272973	1.16209	0.216717	1.0659	0.0920656	1.37332	0.457665	1.28046	0.356657	-1.08982	-0.124091	-1.0966	-0.133033	-1.00622	-0.0089424	115030 pfam06346, Drf_FH1, Formin Homology Region 1. This region is found in some of the Diaphanous related formins (Drfs). It consists of low complexity repeats of around 12 residues.
C188R087	0.000394667	0.470359	2.09729e-05	1.66709	0.737336	1.5088	0.593404	-1.38405	-0.468896	-1.10491	-0.143932	-1.63587	-0.710057	-1.83794	-0.878092	1.41047	0.496175	1.13619	0.184208	-1.2414	-0.311967	117573 pfam09007, EBP50_C-term, EBP50, C-terminal. This C terminal domain allows interaction of EBP50 with FERM (four-point one ERM) domains, resulting in the activation of Ezrin-radixin-moesin (ERM), with subsequent cytoskeletal modulation and cellul...
C097R018	0.0263009	0.764649	0.00259281	-1.34142	-0.423764	-1.08721	-0.120626	1.25522	0.327943	1.23383	0.303138	1.36109	0.444758	1.50451	0.589291	-1.23709	-0.30695	1.10246	0.140722	1.36384	0.447671	118302 pfam09770, PAT1, Topoisomerase II-associated protein PAT1. Members of this family are necessary for accurate chromosome transmission during cell division.
C126R131	0.0461305	0.0115584	0.00356211	1.21735	0.283739	1.09822	0.135173	1.06051	0.0847515	-1.10847	-0.148566	-1.23482	-0.304302	-1.52608	-0.609835	-1.07573	-0.105315	-1.47367	-0.559414	-1.36993	-0.454099	118334 pfam09803, DUF2346, Uncharacterized conserved protein (DUF2346). Members of this family of proteins have no known function.
C009R030	0.0143987	0.121569	0.00628068	1.5138	0.598171	1.22077	0.287787	-1.02207	-0.0314958	-1.24004	-0.310383	-1.41401	-0.499797	-1.46063	-0.546593	1.09419	0.12987	-1.17065	-0.227311	-1.28092	-0.35718	118755 pfam10231, DUF2315, Uncharacterised conserved protein (DUF2315). This is a family of small conserved proteins found from worms to humans. The function is not known.
C220R071	3.45588e-06	0.387919	0.0049341	1.48216	0.567703	1.07427	0.103355	-1.42391	-0.509855	-1.37969	-0.464348	-1.23667	-0.306458	-1.10652	-0.146031	1.70657	0.771099	1.3824	0.467179	-1.23449	-0.30392	118755 pfam10231, DUF2315, Uncharacterised conserved protein (DUF2315). This is a family of small conserved proteins found from worms to humans. The function is not known.
C264R054	0.0356597	0.2249	0.00980598	-1.61728	-0.693566	-1.24574	-0.317007	1.07244	0.100895	1.29824	0.376558	1.47774	0.563397	1.97896	0.984744	-1.1737	-0.231063	1.48128	0.566842	1.73858	0.797906	118767 pfam10243, MIP-T3, Microtubule-binding protein MIP-T3. This protein, which interacts with both microtubules and TRAF3 (tumour necrosis factor receptor-associated factor 3), is conserved from worms to humans. The N-terminal region is the microtu...
C227R038	0.209035	0.187898	0.00224541	-1.11953	-0.162894	-1.09001	-0.12434	1.13681	0.184992	1.02708	0.0385542	1.21247	0.277954	1.73635	0.79606	-1.04967	-0.0699321	1.40126	0.486728	1.47086	0.55666	14 kDa transmembrane protein
C069R041	0.000741964	0.245296	0.00972279	-1.21783	-0.284316	-1.15236	-0.204586	1.07165	0.0998299	1.05682	0.0797299	1.06297	0.0880966	1.30243	0.381201	-1.22778	-0.296049	1.05466	0.0767845	1.29489	0.372834	14-3-3 protein gamma-1
C106R088	0.0233934	0.813084	4.2631e-05	1.17036	0.226954	1.14606	0.196688	1.33165	0.413213	-1.0212	-0.0302653	1.44967	0.53572	1.45408	0.540108	1.27408	0.34946	1.25144	0.323584	-1.0181	-0.0258767	1-acyl-sn-glycerol-3-phosphate acyltransferase eta	254531	Hs.352614
C100R044	0.493115	0.216112	0.00440386	1.1456	0.196103	1.05364	0.0753779	-1.07725	-0.10735	-1.08728	-0.120725	-1.42915	-0.515155	-1.6002	-0.67825	-1.15805	-0.211703	-1.40983	-0.495523	-1.21741	-0.28382	1-O-acylceramide synthase precursor	192654	Mm.284770
C014R072	0.285353	0.815592	0.00202177	-1.20998	-0.274978	-1.10376	-0.142426	-1.38859	-0.47362	1.09623	0.132552	-1.26561	-0.339828	-1.44974	-0.53579	-1.10281	-0.141186	-1.15236	-0.204597	-1.04493	-0.0634108	1-phosphatidylinositol-4,5-bisphosphate phosphodiesterase delta-3	569040	Dr.50929
C040R050	0.000214809	0.486154	0.000356302	-1.08443	-0.116941	1.39369	0.478907	1.28468	0.361404	1.51136	0.595848	1.32282	0.403618	1.68184	0.750037	-1.05316	-0.0747269	1.82455	0.86754	1.92155	0.942267	1-phosphatidylinositol-4,5-bisphosphate phosphodiesterase gamma-2	5336	Hs.413111
C171R077	0.168771	0.113863	0.00806095	1.14761	0.198629	1.20725	0.271719	-1.1199	-0.163375	1.05197	0.0730898	-1.09326	-0.128643	-1.81027	-0.856205	1.17557	0.233361	-1.33896	-0.421112	-1.57404	-0.654473	26S protease regulatory subunit 6A	29677	Rn.11173
C009R016	0.603414	0.194857	0.00906092	1.11073	0.151505	-1.13583	-0.18375	-1.44004	-0.526107	-1.2616	-0.335254	-1.48785	-0.573227	1.0195	0.0278633	1.07504	0.104384	1.29255	0.37022	1.20233	0.265836	26S protease regulatory subunit S10B	5706	Hs.156171
C251R051	0.48455	0.471102	0.00110106	-1.15069	-0.202495	-1.03426	-0.0485927	1.18373	0.243335	1.11257	0.153902	1.40906	0.494732	1.484	0.56949	1.03448	0.0489022	1.21215	0.277562	1.17175	0.22866	26S proteasome non-ATPase regulatory subunit 1	5707	Hs.3887
C108R001	0.0170414	0.707396	0.00582262	-1.14609	-0.196715	-1.19129	-0.252519	-1.15043	-0.202167	-1.03944	-0.0558043	-1.19772	-0.260293	-1.33856	-0.42068	-1.1932	-0.254841	-1.3861	-0.471031	-1.16166	-0.216191	26S proteasome non-ATPase regulatory subunit 12	5718	Hs.646575
C226R137	0.244906	0.416049	0.00381212	1.01773	0.025348	-1.02387	-0.0340326	-1.32136	-0.402028	-1.04202	-0.0593806	-1.11105	-0.151921	-1.26057	-0.334074	1.21038	0.275455	1.02379	0.0339218	-1.18225	-0.241533	26S proteasome non-ATPase regulatory subunit 14	10213	Hs.567410
C166R170	0.778621	0.994808	0.00523801	1.05217	0.0733731	-1.00541	-0.00777891	-1.30305	-0.381888	-1.05786	-0.081152	-1.29557	-0.373585	-1.32696	-0.408125	1.05825	0.0816765	-1.02386	-0.0340155	-1.08349	-0.115692	26S proteasome non-ATPase regulatory subunit 5
C123R033	0.00132328	0.387773	0.00220058	-1.12833	-0.174184	-1.13371	-0.181054	-1.07804	-0.10841	-1.00477	-0.00686989	-1.15962	-0.213649	-1.27415	-0.349539	-1.21371	-0.279423	-1.33995	-0.422183	-1.10402	-0.14276	26S proteasome non-ATPase regulatory subunit 7	5713	Hs.696154
C188R040	0.142794	0.597758	0.000686573	1.00964	0.0138414	-1.08095	-0.112295	-1.22231	-0.289607	-1.09137	-0.126136	-1.12246	-0.16667	-1.16856	-0.224728	1.09945	0.136779	-1.03341	-0.0474159	-1.13618	-0.184195	26S proteasome non-ATPase regulatory subunit 8	5714	Hs.78466
C100R151	0.277295	0.303541	0.000198608	1.05112	0.0719241	1.0929	0.128157	-1.22571	-0.293622	1.03975	0.0562327	-1.14101	-0.190316	-1.43023	-0.516248	1.12914	0.17523	-1.06767	-0.0944693	-1.20556	-0.269699	26S proteasome non-ATPase regulatory subunit 8	5714	Hs.78466
C116R037	0.118422	0.689346	0.000223559	1.215	0.28096	1.03759	0.0532363	-1.27949	-0.355574	-1.17099	-0.227724	-1.4237	-0.509649	-1.27561	-0.351193	1.09193	0.126885	1.04075	0.0576179	-1.04918	-0.0692671	26S proteasome non-ATPase regulatory subunit 9	161475	Rn.24127
C224R050	0.00515614	0.203572	0.00469482	1.26904	0.343739	-1.04822	-0.0679481	-1.06008	-0.0841752	-1.33024	-0.411688	-1.30334	-0.38221	-1.2167	-0.282969	1.03219	0.0457043	-1.20309	-0.266742	-1.24181	-0.312446	26S proteasome non-ATPase regulatory subunit 9	161475	Rn.24127
C010R074	0.00953103	0.496856	0.000146822	1.35285	0.435998	1.14231	0.191957	-1.22287	-0.290267	-1.1843	-0.24404	-1.41522	-0.501029	-1.46588	-0.551768	1.16897	0.225235	-1.04938	-0.0695437	-1.2267	-0.294779	26S proteasome non-ATPase regulatory subunit 9	161475	Rn.24127
C226R143	0.0019367	0.924275	0.000296924	1.25459	0.327216	-1.0226	-0.0322418	-1.28183	-0.358206	-1.28294	-0.359458	-1.28866	-0.365868	-1.37017	-0.45435	1.24795	0.319555	-1.09307	-0.128386	-1.36409	-0.447941	26S proteasome non-ATPase regulatory subunit 9	161475	Rn.24127
C213R026	0.125189	0.886486	0.00149539	1.25907	0.332357	1.00162	0.00233097	-1.41813	-0.503991	-1.25704	-0.330026	-1.5002	-0.585153	-1.32433	-0.405264	1.19019	0.251195	1.07256	0.101059	-1.10967	-0.150136	28S ribosomal protein S7, mitochondrial precursor	619204	Dr.77424
C097R138	0.280115	0.425884	0.000315698	1.204	0.267837	-1.0019	-0.00273427	-1.22919	-0.297709	-1.20629	-0.270571	-1.51786	-0.602037	-1.47202	-0.557797	-1.02562	-0.036491	-1.19982	-0.262823	-1.16986	-0.226332	28S ribosomal protein S7, mitochondrial precursor	619204	Dr.77424
C155R107	0.189803	0.607195	0.0034046	1.08274	0.114682	1.00304	0.00438401	-1.19446	-0.256354	-1.07945	-0.110298	-1.17478	-0.232396	-1.41022	-0.495924	1.10087	0.13864	-1.17706	-0.235186	-1.29579	-0.373826	28S ribosomal protein S9, mitochondrial precursor	519302	Bt.53127
C188R011	0.273102	0.10525	1.35024e-10	-1.09848	-0.13551	-1.11775	-0.160602	3.41716	1.7728	-1.01754	-0.0250919	5.85068	2.5486	9.10262	3.18628	1.55865	0.640296	2.38317	1.25288	1.529	0.612587	29114 cd01119, Chemokine_CC_DCCL, Chemokine_CC_DCCL: subgroup of the Chemokine_CC subgroup based on the presence of a DCCL motif involving the two N-terminal cysteine residues; includes a number of small inducible cytokines capable of reversibly inhib...
C017R076	0.0232267	0.167168	2.44562e-09	1.31225	0.392047	1.2668	0.341192	5.03192	2.33111	-1.03588	-0.0508552	11.2061	3.48621	17.6321	4.14013	2.92239	1.54715	4.43893	2.15021	1.51894	0.603063	29114 cd01119, Chemokine_CC_DCCL, Chemokine_CC_DCCL: subgroup of the Chemokine_CC subgroup based on the presence of a DCCL motif involving the two N-terminal cysteine residues; includes a number of small inducible cytokines capable of reversibly inhib...
C076R042	0.0291928	0.18511	0.00590324	1.69847	0.764235	1.06264	0.0876594	-1.17506	-0.232737	-1.59834	-0.676576	-1.8262	-0.868846	-1.33117	-0.412697	1.09287	0.128126	-1.06607	-0.0923008	-1.16508	-0.220427	29127 cd02052, PEDF, Pigment epithelium-derived factor (PEDF)_like. PEDF is non-inhibitory member of the Serpin superfamily. It exhibits neurotrophic, neuroprotective and antiangiogenic properties and is widely expressed in the developing and adult ner...
C080R144	0.22947	0.118743	0.000116966	1.30695	0.386199	-1.15038	-0.202105	2.37501	1.24794	-1.50348	-0.588304	2.6797	1.42207	14.9727	3.90426	1.47461	0.560333	5.48017	2.45422	3.71635	1.89389	2-oxoisovalerate dehydrogenase subunit beta, mitochondrial precursor	594	Hs.654441
C026R160	0.353857	0.104352	0.000102364	1.17596	0.233833	-1.39569	-0.480975	2.33988	1.22644	-1.64126	-0.714808	2.98726	1.57882	17.8475	4.15765	1.50131	0.586219	5.46508	2.45024	3.64021	1.86402	2-oxoisovalerate dehydrogenase subunit beta, mitochondrial precursor	594	Hs.654441
C134R038	0.110308	0.0449917	8.41447e-12	-1.31606	-0.39622	-1.08016	-0.111244	4.51926	2.17609	1.21839	0.284976	9.4391	3.23865	16.3787	4.03375	1.58705	0.666343	3.35526	1.74642	2.11415	1.08008	30070 cd01439, TCCD_inducible_PARP_like, Poly(ADP-ribose) polymerases catalyse the covalent attachment of ADP-ribose units from NAD+ to itself and to a limited number of other DNA binding proteins, which decreases their affinity for DNA. Poly(ADP-ribos...
C060R046	0.108643	0.303001	1.58929e-12	1.22603	0.293997	1.08182	0.113462	14.5566	3.8636	-1.1333	-0.180535	29.8189	4.89815	38.4776	5.26595	2.51149	1.32855	2.85958	1.5158	1.1386	0.187258	30190 cd01672, TMPK, Thymidine monophosphate kinase (TMPK), also known as thymidylate kinase, catalyzes the phosphorylation of thymidine monophosphate (TMP) to thymidine diphosphate (TDP) utilizing ATP as its preferred phophoryl donor. TMPK represents ...
C010R112	0.357736	0.0554341	4.36283e-12	-1.14984	-0.201434	-1.25522	-0.327939	3.68204	1.8805	-1.09165	-0.126505	7.75969	2.956	8.15598	3.02786	1.83281	0.87406	1.76469	0.819415	-1.0386	-0.0546455	30190 cd01672, TMPK, Thymidine monophosphate kinase (TMPK), also known as thymidylate kinase, catalyzes the phosphorylation of thymidine monophosphate (TMP) to thymidine diphosphate (TDP) utilizing ATP as its preferred phophoryl donor. TMPK represents ...
C110R040	0.190925	0.319937	0.00383895	1.17612	0.23404	1.14249	0.192187	-1.07243	-0.100889	-1.02944	-0.041853	-1.19951	-0.262441	-1.34723	-0.429991	1.05153	0.0724867	-1.09955	-0.136916	-1.15621	-0.209403	32199 COG2016, COG2016, Predicted RNA-binding protein (contains PUA domain) [Translation, ribosomal structure and biogenesis].
C200R103	0.018359	0.698036	0.0083348	1.17433	0.231836	1.10189	0.139979	-1.11282	-0.154218	-1.06574	-0.0918575	-1.12326	-0.167697	-1.24557	-0.316804	1.16341	0.218357	-1.01579	-0.0226075	-1.18178	-0.240964	32199 COG2016, COG2016, Predicted RNA-binding protein (contains PUA domain) [Translation, ribosomal structure and biogenesis].
C255R120	0.000306625	0.528906	0.00501897	1.12288	0.167207	-1.09659	-0.133027	-1.20311	-0.266772	-1.23134	-0.300234	-1.0856	-0.118497	-1.15231	-0.204533	1.24443	0.315482	-1.05029	-0.0707878	-1.30701	-0.38627	39S ribosomal protein L13, mitochondrial	28998	Hs.333823
C150R166	0.176943	0.805986	6.09069e-05	1.17714	0.235283	-1.1413	-0.190676	-1.50739	-0.592054	-1.34347	-0.42596	-1.71819	-0.78089	-1.57094	-0.651625	1.03272	0.0464472	-1.18941	-0.250247	-1.22833	-0.296694	39S ribosomal protein L16, mitochondrial precursor	538054	Bt.4402
C012R006	0.10619	0.158516	0.000510593	1.18242	0.241747	1.13589	0.183829	-1.06105	-0.0854897	-1.04096	-0.0579181	-1.23347	-0.302727	-1.24566	-0.316907	1.01713	0.0245097	-1.03354	-0.0475889	-1.05124	-0.0720986	39S ribosomal protein L28, mitochondrial precursor	447374	Xl.5698
C088R018	0.0922445	0.0772251	0.00439614	1.21919	0.285923	-1.13001	-0.176335	-1.46819	-0.554042	-1.3777	-0.462258	-1.51501	-0.599325	1.06183	0.0865481	1.18152	0.240639	1.3796	0.464255	1.16766	0.223615	3-hydroxyacyl-CoA dehydrogenase type-2	281809	Bt.5231
C189R130	0.313342	0.61307	7.03376e-05	1.09258	0.12774	1.04936	0.0695146	-1.16425	-0.219399	-1.04118	-0.0582253	-1.22792	-0.29622	-1.3061	-0.385268	1.03592	0.0509187	-1.06907	-0.0963539	-1.10747	-0.147273	3-ketoacyl-CoA thiolase, mitochondrial	170465	Rn.3786
C020R039	0.453961	0.147849	0.00341042	1.1419	0.191442	1.12347	0.167964	-1.06574	-0.0918504	-1.01641	-0.0234779	-1.29494	-0.372884	-1.14842	-0.199655	-1.06407	-0.0895917	1.04258	0.0601591	1.10938	0.149751	40S ribosomal protein S11
C044R006	0.206599	0.996379	0.00481051	-1.06892	-0.0961528	-1.2219	-0.289129	-1.29624	-0.374331	-1.14312	-0.192976	-1.28293	-0.359438	-1.30561	-0.384723	-1.05794	-0.0812596	-1.23074	-0.29952	-1.16333	-0.218261	40S ribosomal protein S12	326582	Bt.11675
C041R090	0.183834	0.136168	0.000472923	1.14188	0.191415	1.18971	0.25061	-1.05336	-0.0749964	1.04188	0.0591949	-1.2171	-0.283453	-1.25269	-0.325033	-1.01188	-0.0170416	1.0004	0.000573084	1.01228	0.0176147	40S ribosomal protein S15a	6210	Hs.370504
C241R001	0.109797	0.23606	5.80638e-06	1.16962	0.226043	1.09189	0.126832	-1.18774	-0.248219	-1.07119	-0.099211	-1.33903	-0.421183	-1.4897	-0.57502	1.03748	0.0530791	-1.14867	-0.199969	-1.19172	-0.253048	40S ribosomal protein S16
C050R037	0.899972	0.711406	0.00730953	1.1071	0.146788	1.0274	0.038998	-1.23009	-0.298764	-1.07758	-0.10779	-1.39811	-0.483474	-1.21606	-0.282219	-1.02663	-0.0379212	1.03925	0.0555439	1.06693	0.0934651	40S ribosomal protein S16
C148R075	0.0803366	0.0604202	0.000818185	1.31321	0.3931	1.20947	0.274376	-1.05134	-0.0722294	-1.08577	-0.118724	-1.38934	-0.474399	-1.29392	-0.371747	-1.00631	-0.00906917	-1.01758	-0.0251423	-1.0112	-0.0160732	40S ribosomal protein S16
C235R146	0.150146	0.567327	8.97212e-05	1.13866	0.187341	-1.0368	-0.0521402	-1.21025	-0.275301	-1.18057	-0.239481	-1.34397	-0.426506	-1.22679	-0.294888	1.02536	0.0361365	-1.05097	-0.0717265	-1.07763	-0.107863	40S ribosomal protein S16
C085R091	0.0081865	0.628541	0.00971472	2.9024	1.53725	1.14827	0.199462	1.99122	0.993656	-2.52763	-1.33779	1.59029	0.669287	3.27481	1.71141	2.318	1.21288	1.88847	0.91722	-1.22745	-0.29566	40S ribosomal protein S2
C064R122	0.00812483	0.537988	0.00538462	3.24574	1.69855	1.3566	0.439994	2.36401	1.24123	-2.39255	-1.25855	1.57642	0.656656	3.57622	1.83843	2.1644	1.11397	2.05223	1.03719	-1.05466	-0.0767729	40S ribosomal protein S2
C259R141	0.00319321	0.529487	0.00766132	3.18882	1.67302	1.35709	0.440519	1.99197	0.994199	-2.34974	-1.2325	1.51124	0.595728	3.40974	1.76966	2.41923	1.27455	2.32299	1.21598	-1.04143	-0.0585667	40S ribosomal protein S2
C214R007	0.955562	0.276772	0.00374328	1.13748	0.185842	1.04813	0.0678184	-1.11057	-0.151306	-1.08525	-0.118024	-1.38685	-0.471813	-1.22869	-0.297126	-1.09784	-0.134665	-1.05555	-0.0780016	1.04006	0.0566633	40S ribosomal protein S20	122772	Rn.103133
C092R004	3.98693e-05	0.066796	0.00412075	1.31606	0.396225	1.28858	0.365779	-1.09997	-0.137463	-1.02133	-0.0304466	-1.3186	-0.399007	-1.04216	-0.0595732	1.09785	0.134681	1.36006	0.443668	1.23884	0.308987	40S ribosomal protein S23
C192R039	0.176654	0.237996	0.00769105	1.21115	0.276374	1.0141	0.0201965	-1.08203	-0.113737	-1.19431	-0.256178	-1.31039	-0.389995	-1.13913	-0.187937	1.00008	0.000115938	-1.03814	-0.0540037	-1.03823	-0.0541196	40S ribosomal protein S23
C136R042	0.000163407	0.537958	3.95638e-05	1.1909	0.252052	1.2469	0.318351	-1.22373	-0.291288	1.04703	0.0662986	-1.29972	-0.378198	-1.15408	-0.206745	1.12128	0.165142	1.32216	0.402893	1.17915	0.237751	40S ribosomal protein S25	443521	Oar.1096
C114R095	0.00855281	0.56297	6.58684e-05	1.15415	0.206836	1.19763	0.260179	-1.25582	-0.328633	1.03767	0.0533426	-1.1902	-0.251203	-1.37902	-0.463638	1.21779	0.284266	1.09064	0.125174	-1.11658	-0.159093	40S ribosomal protein S25	443521	Oar.1096
C184R128	0.0233242	0.421916	0.000716739	1.12181	0.16583	1.06994	0.0975278	-1.27917	-0.355204	-1.04848	-0.0683018	-1.25665	-0.329586	-1.08299	-0.115023	1.14191	0.191448	1.26375	0.337709	1.1067	0.146261	40S ribosomal protein S25	443521	Oar.1096
C196R151	0.000559725	0.510667	1.54146e-05	1.13261	0.179655	1.07424	0.103321	-1.18121	-0.24027	-1.05434	-0.0763337	-1.13219	-0.179122	-1.2528	-0.325162	1.18165	0.240803	1.01286	0.018429	-1.16665	-0.222374	40S ribosomal protein S25	393788	Dr.32370
C258R120	0.121831	0.857571	0.000145843	1.10913	0.149423	1.08246	0.114309	-1.35596	-0.439319	-1.02464	-0.0351142	-1.26758	-0.342077	-1.3514	-0.43446	1.18646	0.246665	1.08611	0.119168	-1.0924	-0.127497	40S ribosomal protein S3a	100049481	Ola.4914
C002R138	0.00688094	0.440068	3.28058e-08	1.28201	0.358403	1.17706	0.23519	-1.37218	-0.456473	-1.08916	-0.123213	-1.54301	-0.625747	-1.60785	-0.685131	1.14008	0.189129	1.00454	0.00653201	-1.13493	-0.182597	40S ribosomal protein S3a	100049481	Ola.4914
C086R141	0.0144797	0.340418	3.81985e-06	1.23998	0.310319	1.28886	0.3661	-1.22461	-0.292318	1.03942	0.0557803	-1.37275	-0.457068	-1.49118	-0.576456	1.10617	0.14557	1.05846	0.0819619	-1.04508	-0.0636082	40S ribosomal protein S3a	100049481	Ola.4914
C196R167	0.0369944	0.133575	1.0943e-07	1.06268	0.0877038	1.04564	0.0643803	-1.3745	-0.458905	-1.0163	-0.0233235	-1.24875	-0.320486	-1.63356	-0.708016	1.16969	0.226123	-1.1366	-0.18473	-1.32947	-0.410853	40S ribosomal protein S3a	100049481	Ola.4914
C024R116	0.267788	0.172142	0.000424048	1.13408	0.181524	1.15301	0.205399	-1.06117	-0.0856513	1.01669	0.0238749	-1.19775	-0.260322	-1.27164	-0.346692	1.00476	0.00685295	-1.03932	-0.0556421	-1.04427	-0.0624951	40S ribosomal protein S4
C039R014	0.049265	0.28754	2.28776e-05	1.0995	0.136854	1.09621	0.132528	-1.28352	-0.360108	-1.003	-0.00432588	-1.37452	-0.458931	-1.13184	-0.178665	1.02671	0.038031	1.24312	0.313971	1.21078	0.27594	40S ribosomal protein S9	6203	Hs.467284; Hs.546288
[truncated: 1,963 more rows]

## Sheet: Interaction-262
Spot ID	p-value(IHNV status)	p-value(IHNV status-polyIC)	p-value(polyIC)	Fold change([control-survivor] vs [control-naive])	Log Fold change([control-survivor] vs [control-naive])	Fold change([control-z_carrier] vs [control-naive])	Log Fold change([control-z_carrier] vs [control-naive])	Fold change([polyIC-naive] vs [control-naive])	Log Fold change([polyIC-naive] vs [control-naive])	Fold change([control-z_carrier] vs [control-survivor])	Log Fold change([control-z_carrier] vs [control-survivor])	Fold change([polyIC-survivor] vs [control-survivor])	Log Fold change([polyIC-survivor] vs [control-survivor])	Fold change([polyIC-z_carrier] vs [control-z_carrier])	Log Fold change([polyIC-z_carrier] vs [control-z_carrier])	Fold change([polyIC-survivor] vs [polyIC-naive])	Log Fold change([polyIC-survivor] vs [polyIC-naive])	Fold change([polyIC-z_carrier] vs [polyIC-naive])	Log Fold change([polyIC-z_carrier] vs [polyIC-naive])	Fold change([polyIC-z_carrier] vs [polyIC-survivor])	Log Fold change([polyIC-z_carrier] vs [polyIC-survivor])	Description	GeneId	UniGene
[truncated: 262 more rows]
